# Supplementary material
Source: publisher figshare collection journal article supplement (https://gsapubs.figshare.com/articles/dataset/_/14673861)
Supplement: Supplementary file 1 [file 1]

## Sheet: Info
Supplementary File S3. Compiled detrital zircon geochronology
Compiled sample information and detrital zircon U-Pb analytical data are given on separate tabs. Analyses with red text have been flitered due to high U/Th, high U, violating concordance criteria, or significantly younger than independent age controls. Analyses with blue text are young isolated ages. Analyses with orange text are high U (1000-2000 ppm) but apparently concordant analyses that were…
Please cite these data as the paper in which this supplementary file was published: Attia, S., Paterson, S.R., Saleeby, J., and Cao, W., 2021, Detrital zircon provenance and depositional links of Mesozoic Sierra Nevada intra-arc strata: Geosphere, v. xx, n. xx, p. xx-xx.

## Sheet: Summary Table
TABLE 1. DETRITAL ZIRCON SAMPLE SUMMARY
Sample	Sample	Location*		MDA#	Depositional	Reference
name	no.	Easting	Northing	(Ma)	age
Northern Sierra Nevada
EPF	4	221383	4329726	178	Lower Jurassic	Christe et al., 2018
BVS	1	194387	4357493	187		Christe et al., 2018
Sea2000-SCF	2	194455	4357453	200		Spurlin et al., 2000
Sea2000-UUT	3	193504	4352591	**255	Triassic	Spurlin et al., 2000
Eastern Sierra Nevada
DL16-35-a	29	304337	4178781	101	mid-Cretaceous	this study (IESNI000P##)
K-34	17	295074	4212648	117	Lower Cretaceous	Cao et al., 2015
EC345	10	277456	4230560	136	lowermost Cretaceous	this study (IESNI000D)
Mea10a-JT14	7	273090	4231376	144		Memeti et al., 2010a
EM16-50-c	31	308783	4177765	148	Middle-Upper Jurassic	this study (IESNI000R)
VT16-2-b	32	312920	4174218	152		this study (IESNI000Y)
EC141	8	281240	4231351	154		this study (IESNI000E)
EC46	9	284521	4231175	162		this study (IESNI000G)
2-68	18	298179	4206033	163		this study (IESNI000K)
S-31	21	299075	4203335	171		this study (IESNI000N)
VT15-28	33	312886	4174217	***N.D.		this study (IESNI000X)
A-158	28	311023	4179913	185	Lower Jurassic	this study (IESNI000U)
S-33	14	293459	4216017	186		Cao et al., 2015
S-40	15	293455	4215567	187		Cao et al., 2015
3-100	20	298574	4204080	191		this study (IESNI000L)
B-49B	30	307872	4178063	193		this study (IESNI000Q)
EC544	13	292943	4220577	194		this study (IESNI000H)
NR15-98	27	309790	4183553	194		this study (IESNI000T)
3-57	19	298608	4205001	**212	Lower Jurassic(?)	this study (IESNI000M)
VT15-9-c	35	312611	4174056	208	uppermost Triassic	this study (IESNI000W)
VT15-15-a	36	311528	4173770	210		this study (IESNI000V)
VT15-20	37	309687	4173267	216		this study (IESNI000S)
S-1823	39	375610	4085541	216	Triassic	this study (IESNI0010)
TCL-13-5	26	301573	4198736	217		Ardill et al., 2020
VT15-3-a	34	314306	4174216	217		this study (IESNI000Z)
TP-7	23	300724	4200625	219		Ardill et al., 2020
TP-1	24	300967	4199767	220		Ardill et al., 2020
KA-9	25	300695	4199512	220		Ardill et al., 2020
EC538	12	293373	4220867	**220		this study (IESNI000I)
K-57	16	299270	4214813	221		Cao et al., 2015
EC472	11	297051	4221271	225		this study (IESNI000J)
EC386	6	281847	4233194	230		this study (IESNI000F)
S-23	22	299444	4203232	247		this study (IESNI000O)
S1822	38	374555	4086173	255	Permo-Triassic	Attia et al., 2018
Axial Sierra Nevada
Mea10a-JT013	40	298499	4157381	97	mid-Cretaceous	Memeti et al., 2010
BCP-6	42	334429	4077096	114	Lower Cretaceous	this study (IESNI0001)
Mea10a-JT-09	41	297845	4157323	183	Lower Jurassic	Memeti et al., 2010
Mea10a-SLP-5	5	273761	4228634	188		Memeti et al., 2010
09-KK-1	43	338950	4075188	**194		this study (IESNI0002)
Southern Sierra Nevada
050611-3	49	368265	3990624	142	lowermost Cretaceous	this study (IESNI0016)
050611-2	47	368098	3990849	159	Jurassic	this study (IESNI0015)
02SS06	50	377986	3942469	171		this study (IESNI0018)
14SS03	51	377944	3941470	178		this study (IESNI0017)
050611-1	48	368015	3990844	***N.D.	Jurassic(?)	this study (IESNI0014)
MK318	45	356301	4032907	187	Lower Jurassic	this study (IESNI0012)
09-KK-4	44	341569	4043016	**188		this study (IESNI0011)
08TC44	52	368106	3870470	238	Triassic	Chapman et al., 2012
MK23	46	359278	4029993	265		this study (IESNI0013)
Central Western Metamorphic Belt
PB65A	58	209450	4188200	153	Middle-Upper Jurassic	Snow and Ernst, 2008
PB131A	62	219700	4170600	154		Snow and Ernst, 2008
PB04B	57	209700	4188900	157		Snow and Ernst, 2008
MR-5	61	252911	4172876	157		this study (IESNI000C)
PB158A	59	206200	4173200	159		Snow and Ernst, 2008
PB23A	68	224300	4162500	160		Snow and Ernst, 2008
MR-6	60	250155	4173165	**160		this study (IESNI000B)
MR-7	67	235751	4164695	168		this study (IESNI000A)
CH-MR-9	65	229405	4166071	170		this study (IESNI0008)
CH-MR-1	64	229887	4166555	171		this study (IESNI0009)
MVPriest	56	212021	4190056	172		this study (IESNI0003)
Sal82-MLB1	53	201347	4194460	###198	Middle-Upper Jurassic(?)	Saleeby, 1982
SP-2	54	222452	4190584	**467		this study (IESNI0005)
SP-3	55	212667	4190486	***N.D.		this study (IESNI0004)
Bagby1	63	223414	4167039	206	uppermost Triassic	this study (IESNI0006)
CH-MR-7	66	228019	4165979	255	Permo-Triassic	this study (IESNI0007)
CH-MR-5	-	228124	4165760	-	Mississippian(?)	Attia et al., 2018
Southern Western Metamorphic Belt
MM-GP-03	72	307374	4055032	135	lowermost Cretaceous	Martin and Clemens-Knott, 2015
MM-GP-02	73	307329	4054955	135		Martin and Clemens-Knott, 2015
MM-GP-07	77	307305	4053154	135		Martin and Clemens-Knott, 2015
MM-GP-09	78	309073	4049828	136		Martin and Clemens-Knott, 2015
MM-GP-13	76	308144	4054059	138		Martin and Clemens-Knott, 2015
MM-GP-12	75	308038	4054155	140		Martin and Clemens-Knott, 2015
MM-GP-08	74	307663	4054350	160		Martin and Clemens-Knott, 2015
C9	79	317567	4011365	165	Middle-Upper Jurassic	Saleeby, 2011
FG-2-2	70	262385	4114246	165		this study (IESNI0019)
09-KK-5	80	325497	3962710	**173	Middle-Upper Jurassic(?)	this study (IESNI001C)
VM-30	71	312773	4069702	***N.D.		this study (IESNI001B)
SN-11-2	69	263639	4128398	187	Lower Jurassic	this study (IESNI001A)
Twin Lakes Assemblage
S08-15b	-	293019	4216615	-	mid- to upper Paleozoic	Cao et al., 2015
Cao16-522	-	296064	4224132	-		Cao, 2016
Cao16-77	-	285692	4228632	-		Cao, 2016
EC 133	-	295266	4229112	-		Cao, 2016
EC 190	-	290366	4226721	-		Cao, 2016
EC 238	-	292795	4227558	-		Cao, 2016
P-8	-	290243	4226757	-		Cao, 2016
S-59A	-	280772	4231836	-		Cao, 2016
Chert-Argillite Unit
TP-8	-	301024	4202977	-	mid-Paleozoic	Ardill et al., 2020
1-96	-	300913	4205737	-		this study (IESNI001D)
Morrison Block
RTCL1	-	334870	4161266	-	Paleozoic	Attia et al., 2018
RTF01	-	338123	4161740	-		Attia et al., 2018
RTMG01	-	348306	4156916	-		Attia et al., 2018
VT15-12-A	-	316148	4172932	-		Attia et al., 2018
El Paso Terrane
B-D1-10	-	381268	3997075	-	lower Paleozoic	Attia et al., 2018
K-D1-10	-	403098	3970390	-		Attia et al., 2018
K-D23-10	-	395956	3981518	-		Attia et al., 2018
Northern Sierra Terrane
Sea2000-AF	-	190327	4375067	-	lower to mid-Paleozoic	Spurlin et al., 2000
Sea2000-PVF	-	208291	4349081	-		Spurlin et al., 2000
Hea20-CLA	-	188472	4373764	-		Hardin et al., 2000
Hea20-DPA	-	186440	4362602	-		Hardin et al., 2000
Hea20-LS	-	191211	4348049	-		Hardin et al., 2000
Hea20-SCM	-	186572	4385950	-		Hardin et al., 2000
VP-XIII-BL-11	-	188768	4374033	-		Powerman et al., 2020
Snow Lake Terrane
Mea10a-BP-M-314	-	277368	4211224	-	Neoproterozoic-lower Paleozoic	Memeti et al., 2010
Mea10a-ML-369	-	280093	4190294	-		Memeti et al., 2010
Mea10a-ML-459	-	280093	4190294	-		Memeti et al., 2010
Mea10a-RE-242	-	278552	4210145	-		Memeti et al., 2010
Mea10a-SLP-13	-	270372	4227324	-		Memeti et al., 2010
Mea10a-SLP-21	-	269801	4226839	-		Memeti et al., 2010
Mea10a-SN7131	-	286675	4176986	-		Memeti et al., 2010
SLP-Sterling1	-	271000	4228100	-		Grasse et al., 2001; Memeti et al., 2010
SLP-Zabriskie1	-	269500	4227000	-		Grasse et al., 2001; Memeti et al., 2010
09-KK-6	-	336487	4077507	-		Attia et al., 2018
BC-31	-	336412	4076587	-		Attia et al., 2018
BCE-8	-	339506	4074888	-		Attia et al., 2018
He-8	-	279254	4154173	-		Attia et al., 2018
SP-1	-	252787	4181361	-		Attia et al., 2018
ML-262-3	-	280789	4190815	-		this study (IESNI001F)
FD-2	-	282575	4156502	-		this study (IESNI001E)
Kernville Terrane
07SS10	-	366730	3980080		Neoproterozoic-Ordovician(?)	Attia et al., 2018
081103E	-	368852	3968604			Attia et al., 2018
09-KK-3	-	341179	4042873			Attia et al., 2018
89SS4	-	369387	3960859			Saleeby, 2011
91SS32	-	368931	3968408			Saleeby, 2011
Tehachapi Mountains
08BC60	-	374800	3872352	-	Ordovician(?)	Chapman et al., 2012
08SE258	-	312700	3859978	-	Neoproterozoic-Paleozoic(?)	Chapman et al., 2012
*UTM coordinates given in NAD27 zone 11.
#MDA = maximum depositional age, determined by center of youngest age peak
**poorly constrained MDA
##SESAR sample IGSN in parantheses
***N.D. = no reliable interpreted maximum depositional age
###MDA based on multigrain fraction anlaysis
08BC60	-	374800	3872352			Chapman et al., 2012	Tehachapi Mountains
08SE258	-	312700	3859978			Chapman et al., 2012	Tehachapi Mountains

## Sheet: DZ U-Pb Analytical Data
			Isotope ratios										Apparent ages (Ma)
			U	206Pb	U/Th	206Pb*	±	207Pb*	±	206Pb*	±	error	206Pb*	±	207Pb*	±	206Pb*	±	Best age	± (1SD)	Conc
Analyses	SampleName	GeologicAge	(ppm)	204Pb		207Pb*	(%)	235U*	(%)	238U	(%)	corr.	238U*	(Ma)	235U	(Ma)	207Pb*	(Ma)	(Ma)	(Ma)	(%)	Filtering	Comment
02SS06-15	02SS06	PTr-K	1640.78	36326.3	2.55892	19.5424	3.36664	0.214087	3.58365	0.0303436	1.22813	0.342703	192.698	2.33156	196.976	6.41655	248.552	77.5362	192.698	2.33156	NA	exclude	high U
02SS06-63	02SS06	PTr-K	1415.41	134991	2.70636	19.5785	0.870471	0.253922	1.55348	0.0360561	1.28669	0.828266	228.34	2.88661	229.757	3.19424	244.272	20.0478	228.34	2.88661	NA	exclude	high U
02SS06-104	02SS06	PTr-K	1027.42	69909.1	0.990768	19.4467	1.58324	0.282504	1.75064	0.0398445	0.747053	0.426731	251.869	1.84531	252.642	3.91557	259.801	36.372	251.869	1.84531	NA	exclude	high U
02SS06-76	02SS06	PTr-K	121.283	48029.7	1.84201	11.6958	6.91072	0.554252	11.5599	0.0470149	9.2668	0.801632	296.169	26.8246	447.778	41.8809	1326.9	133.951	296.169	26.8246	NA	exclude	off concordia
02SS06-86	02SS06	PTr-K	363.237	53603.2	1.61577	20.0904	5.0137	0.182423	5.57496	0.0265807	2.43783	0.437282	169.113	4.06907	170.143	8.73352	184.479	116.829	169.113	4.06907	NA
02SS06-38	02SS06	PTr-K	338.658	26531.3	1.70577	19.4738	5.46984	0.189592	5.87367	0.0267775	2.14029	0.364387	170.348	3.59819	176.281	9.50548	256.594	125.806	170.348	3.59819	NA
02SS06-83	02SS06	PTr-K	653.968	70618.8	0.777547	20.0448	2.56589	0.184412	2.76784	0.0268096	1.03786	0.374971	170.55	1.74686	171.85	4.37583	189.765	59.693	170.55	1.74686	NA
02SS06-59	02SS06	PTr-K	184.853	16101.1	0.636729	20.2622	10.3556	0.183636	10.7505	0.0269862	2.88679	0.268527	171.659	4.89003	171.185	16.9371	164.617	242.583	171.659	4.89003	NA
02SS06-67	02SS06	PTr-K	864.55	96369.4	1.16951	19.9529	1.82159	0.187986	2.20574	0.0272039	1.24383	0.563906	173.024	2.12351	174.91	3.54406	200.494	42.2893	173.024	2.12351	NA
02SS06-24	02SS06	PTr-K	219.589	11094.9	1.05432	20.4262	11.8357	0.188198	12.3753	0.0278804	3.61453	0.292076	177.269	6.32015	175.09	19.9052	145.786	278.419	177.269	6.32015	NA
02SS06-60	02SS06	PTr-K	471.182	25966.3	1.38344	20.2196	3.9798	0.201808	4.65114	0.0295945	2.40713	0.517536	188.01	4.46029	186.655	7.93052	169.524	92.9754	188.01	4.46029	NA
02SS06-36	02SS06	PTr-K	777.58	25681	1.14479	20.0213	3.14328	0.204876	3.215	0.0297496	0.675259	0.210034	188.981	1.25759	189.243	5.5509	192.539	73.1029	188.981	1.25759	NA
02SS06-56	02SS06	PTr-K	261.314	16343	1.0595	20.4143	12.0066	0.20177	12.4527	0.0298737	3.30333	0.26527	189.758	6.17698	186.622	21.2321	147.145	282.393	189.758	6.17698	NA
02SS06-78	02SS06	PTr-K	726.495	89548.1	1.03778	20.1783	3.36279	0.205776	3.46015	0.0301146	0.81504	0.23555	191.266	1.53599	190.002	5.99596	174.305	78.4905	191.266	1.53599	NA
02SS06-58	02SS06	PTr-K	289.826	31203.6	1.125	19.5946	8.30376	0.212499	8.67891	0.0301989	2.52408	0.290829	191.793	4.7697	195.647	15.4456	242.367	191.624	191.793	4.7697	NA
02SS06-102	02SS06	PTr-K	221.321	22562.7	3.08773	21.1034	7.76547	0.198566	8.05245	0.0303918	2.13057	0.264586	193	4.05105	183.912	13.5465	68.7119	184.989	193	4.05105	NA
02SS06-18	02SS06	PTr-K	234.861	24065.6	1.76005	19.9835	10.6687	0.215054	11.2408	0.0311686	3.5403	0.314953	197.858	6.89838	197.785	20.2039	196.915	248.48	197.858	6.89838	NA
02SS06-96	02SS06	PTr-K	186.841	14445.8	1.84376	20.5154	11.0158	0.21815	11.2295	0.0324589	2.1802	0.194149	205.919	4.4185	200.369	20.4222	135.505	259.516	205.919	4.4185	NA
02SS06-84	02SS06	PTr-K	493.406	37205.6	3.14417	20.7444	4.7189	0.217077	5.07298	0.0326598	1.862	0.367044	207.174	3.79626	199.474	9.18756	109.354	111.483	207.174	3.79626	NA
02SS06-82	02SS06	PTr-K	364.483	35259.8	2.83067	19.8739	3.23363	0.229196	4.09291	0.033036	2.50908	0.613032	209.522	5.17255	209.535	7.74918	209.697	74.9549	209.522	5.17255	NA
02SS06-25	02SS06	PTr-K	986.5	68305.1	2.07711	19.4945	1.47338	0.263521	1.6315	0.0372586	0.700685	0.429473	235.818	1.62249	237.5	3.45503	254.153	33.8776	235.818	1.62249	NA
02SS06-20	02SS06	PTr-K	180.704	10261.5	3.24625	20.1485	7.50401	0.25982	7.97516	0.0379678	2.70056	0.338621	240.224	6.36801	234.522	16.7022	177.744	175.174	240.224	6.36801	NA
02SS06-97	02SS06	PTr-K	581.701	113336	1.25712	19.3958	3.52293	0.279663	3.67057	0.0393407	1.03057	0.280767	248.745	2.51467	250.39	8.1454	265.855	80.8788	248.745	2.51467	NA
02SS06-73	02SS06	PTr-K	118.136	11008.7	2.30847	19.6631	11.943	0.280997	12.825	0.0400731	4.67366	0.364419	253.286	11.6082	251.448	28.5729	234.363	276.45	253.286	11.6082	NA
02SS06-16	02SS06	PTr-K	679.826	43068.3	3.30981	19.5817	2.81082	0.285174	3.65278	0.0405004	2.33284	0.638646	255.934	5.85355	254.754	8.23021	243.918	64.7709	255.934	5.85355	NA
02SS06-32	02SS06	PTr-K	666.171	71395.3	0.567757	19.4886	2.19888	0.287279	2.30932	0.0406053	0.705614	0.305551	256.584	1.77493	256.415	5.23298	254.89	50.5504	256.584	1.77493	NA
02SS06-29	02SS06	PTr-K	241.135	26765.2	1.61832	18.8274	3.3078	0.305786	3.8006	0.0417548	1.87163	0.492458	263.701	4.83593	270.909	9.03731	333.691	75.0056	263.701	4.83593	NA
02SS06-105	02SS06	PTr-K	465.544	42306.2	1.90493	19.419	2.92493	0.302217	3.06912	0.0425642	0.92969	0.302917	268.708	2.4468	268.13	7.23247	263.087	67.1628	268.708	2.4468	NA
02SS06-13	02SS06	PTr-K	331.056	32745.8	1.07781	19.7785	4.24103	0.297698	4.59566	0.042704	1.77024	0.385197	269.572	4.67366	264.601	10.7052	220.79	98.1746	269.572	4.67366	NA
02SS06-21	02SS06	PTr-K	224.866	18454.7	1.06961	19.6588	6.23563	0.300979	6.96278	0.0429134	3.09794	0.444929	270.866	8.21743	267.165	16.3575	234.864	144.013	270.866	8.21743	NA
02SS06-47	02SS06	PTr-K	163.648	23642.6	3.61701	19.2515	10.1275	0.311269	10.284	0.043461	1.78713	0.173777	274.25	4.79841	275.164	24.7926	282.965	232.199	274.25	4.79841	NA
02SS06-52	02SS06	PTr-K	674.572	73598.3	3.11754	19.4315	1.49227	0.315364	1.77673	0.0444444	0.964304	0.542742	280.323	2.64524	278.33	4.32533	261.625	34.2736	280.323	2.64524	NA
02SS06-39	02SS06	PTr-K	53.995	6284.69	0.853594	20.9826	24.8887	0.316849	25.2438	0.0482182	4.21906	0.167133	303.573	12.511	279.476	61.7497	82.3251	598.679	303.573	12.511	NA
02SS06-12	02SS06	PTr-K	657.401	125967	0.380593	19.0855	1.46276	0.349234	1.85125	0.0483412	1.13466	0.612917	304.33	3.37288	304.145	4.86551	302.748	33.3677	304.33	3.37288	NA
02SS06-98	02SS06	PTr-K	274.101	44769.3	1.41368	18.1461	1.89736	0.491795	2.23286	0.0647241	1.17716	0.527196	404.292	4.61298	406.133	7.47436	416.595	42.4025	404.292	4.61298	NA
02SS06-42	02SS06	PTr-K	741.713	162914	1.24882	18.2065	0.888315	0.503836	1.05058	0.0665294	0.560912	0.533905	415.212	2.25556	414.295	3.57397	409.17	19.8717	415.212	2.25556	NA
02SS06-90	02SS06	PTr-K	317.092	59319.4	0.63757	18.1425	3.71098	0.525414	3.77802	0.069135	0.708531	0.187541	430.942	2.95354	428.762	13.2139	417.039	82.943	430.942	2.95354	NA
02SS06-51	02SS06	PTr-K	94.9154	26863	0.55052	18.4058	9.24162	0.528059	9.36545	0.0704914	1.51789	0.162073	439.116	6.44335	430.52	32.874	384.758	208.034	439.116	6.44335	NA
02SS06-17	02SS06	PTr-K	242.386	20008.2	1.18707	17.2089	3.74516	0.585714	6.66429	0.0731036	5.5124	0.827155	454.827	24.208	468.127	24.9996	533.882	82.0228	454.827	24.208	NA
02SS06-6	02SS06	PTr-K	425.079	87228.9	2.11524	17.5875	2.10806	0.617161	2.46438	0.0787229	1.27643	0.51795	488.495	6.00488	488.066	9.54982	486.052	46.559	488.495	6.00488	NA
02SS06-27	02SS06	PTr-K	70.7656	13271.6	1.20975	17.1323	8.00345	0.725362	8.37661	0.0901298	2.47231	0.295144	556.305	13.1769	553.827	35.7728	543.652	175.189	556.305	13.1769	102.327
02SS06-3	02SS06	PTr-K	38.123	8382.75	1.98878	17.9669	15.5786	0.741928	16.188	0.0966795	4.39974	0.271791	594.92	25.0036	563.53	70.1202	438.721	348.567	594.92	25.0036	135.603
02SS06-45	02SS06	PTr-K	92.1497	15474.8	1.24354	16.2627	4.11055	0.946608	4.89813	0.111651	2.66366	0.54381	682.327	17.2461	676.335	24.1899	656.417	88.1773	682.327	17.2461	103.947
02SS06-26	02SS06	PTr-K	307.42	74500.3	2.01263	15.8524	1.53889	0.992297	1.71482	0.114087	0.756588	0.441206	696.438	4.99452	699.892	8.67254	711.004	32.7132	696.438	4.99452	97.9513
02SS06-57	02SS06	PTr-K	385.97	68445.8	1.10962	15.988	1.14798	0.999722	2.56244	0.115923	2.29091	0.894033	707.057	15.3413	703.669	13.0082	692.846	24.4553	707.057	15.3413	102.051
02SS06-94	02SS06	PTr-K	82.7439	35388.5	2.4644	14.899	5.53844	1.09249	8.45013	0.118052	6.38203	0.755258	719.341	43.4405	749.713	44.8259	841.474	115.346	719.341	43.4405	85.4858
02SS06-41	02SS06	PTr-K	157.025	45646.3	7.58185	14.189	1.58126	1.42942	2.21414	0.147099	1.54985	0.699978	884.682	12.812	901.307	13.2287	942.285	32.4003	942.285	32.4003	93.8869
02SS06-66	02SS06	PTr-K	238.229	116804	1.68292	14.0362	1.20674	1.58328	1.34859	0.161177	0.602043	0.446426	963.317	5.38706	963.659	8.39275	964.458	24.6412	964.458	24.6412	99.8817
02SS06-68	02SS06	PTr-K	162.358	62909.7	2.57777	14.0097	2.20839	1.5125	3.55047	0.153682	2.78008	0.783018	921.571	23.8734	935.451	21.7056	968.297	45.0523	968.297	45.0523	95.1745
02SS06-4	02SS06	PTr-K	147.037	46890.8	1.78067	13.8087	2.06863	1.6617	6.55342	0.16642	6.21837	0.948874	992.354	57.1947	994.026	41.5656	997.697	42.0302	997.697	42.0302	99.4644
02SS06-100	02SS06	PTr-K	235.053	120175	2.46483	13.7816	0.807557	1.62771	2.2399	0.162696	2.08926	0.932747	971.74	18.8461	980.973	14.0892	1001.68	16.39	1001.68	16.39	97.0111
02SS06-62	02SS06	PTr-K	190.601	63433.9	2.82098	13.743	1.47223	1.72273	1.66816	0.171711	0.784414	0.470226	1021.53	7.41039	1017.04	10.7176	1007.37	29.8603	1007.37	29.8603	101.405
02SS06-92	02SS06	PTr-K	26.7513	7450.84	2.55554	13.7058	7.58912	1.5126	8.4498	0.150358	3.71543	0.439706	902.971	31.3058	935.489	51.6954	1012.87	154.031	1012.87	154.031	89.1499
02SS06-87	02SS06	PTr-K	341.996	170603	3.37482	13.7031	0.385433	1.72416	0.70539	0.171354	0.590777	0.837518	1019.56	5.57118	1017.57	4.53322	1013.28	7.81183	1013.28	7.81183	100.621
02SS06-49	02SS06	PTr-K	174.64	100106	2.03023	13.6331	1.4817	1.72588	1.84724	0.170649	1.10311	0.597166	1015.69	10.3661	1018.22	11.8762	1023.64	30.0034	1023.64	30.0034	99.2228
02SS06-54	02SS06	PTr-K	229.725	168255	4.34347	13.5875	0.738092	1.72773	1.13156	0.170261	0.857703	0.757981	1013.55	8.04428	1018.91	7.27764	1030.42	14.939	1030.42	14.939	98.3627
02SS06-37	02SS06	PTr-K	156.062	77284.7	3.34463	13.5215	1.66075	1.7457	2.50748	0.171196	1.87866	0.749223	1018.7	17.7024	1025.57	16.189	1040.25	33.5431	1040.25	33.5431	97.9279
02SS06-77	02SS06	PTr-K	104.007	33654.5	3.13941	13.3505	1.9126	1.87206	2.3952	0.181265	1.44186	0.601978	1073.88	14.2629	1071.26	15.8538	1065.94	38.4681	1065.94	38.4681	100.745
02SS06-5	02SS06	PTr-K	93.0015	53995.2	4.83914	13.3109	2.88058	1.85511	3.93379	0.179091	2.67899	0.681019	1062.01	26.2312	1065.25	25.9586	1071.9	57.8851	1071.9	57.8851	99.0768
02SS06-46	02SS06	PTr-K	362.639	243709	2.57191	13.1785	0.666402	1.922	1.05312	0.183704	0.81546	0.774326	1087.18	8.15825	1088.76	7.03378	1091.91	13.3473	1091.91	13.3473	99.5666
02SS06-33	02SS06	PTr-K	205.444	102080	5.90436	13.0834	1.52724	1.73888	2.75359	0.165002	2.29124	0.832093	984.513	20.9196	1023.05	17.7529	1106.44	30.5241	1106.44	30.5241	88.9799
02SS06-69	02SS06	PTr-K	71.1091	33868.5	2.76664	12.9964	2.81073	1.933	2.95314	0.182202	0.905998	0.306791	1079	9.00135	1092.58	19.7647	1119.77	56.0753	1119.77	56.0753	96.359
02SS06-103	02SS06	PTr-K	227.172	168480	2.93382	12.8129	1.1077	2.10271	3.67142	0.195401	3.50034	0.9534	1150.57	36.8847	1149.69	25.2692	1148.03	21.9988	1148.03	21.9988	100.221
02SS06-1	02SS06	PTr-K	359.709	241742	2.6723	12.7441	0.566747	2.12713	1.10305	0.196608	0.946317	0.85791	1157.07	10.0232	1157.66	7.61871	1158.73	11.2382	1158.73	11.2382	99.8573
02SS06-7	02SS06	PTr-K	160.098	142799	1.35621	12.6731	0.946109	2.15976	1.53911	0.198512	1.21397	0.788751	1167.32	12.962	1168.2	10.6823	1169.79	18.7508	1169.79	18.7508	99.7891
02SS06-79	02SS06	PTr-K	102.456	60842	2.93914	12.4775	0.820368	2.15473	1.23008	0.194993	0.916564	0.745126	1148.37	9.64128	1166.58	8.53107	1200.56	16.1679	1200.56	16.1679	95.6526
02SS06-31	02SS06	PTr-K	314.312	191236	3.04967	12.0365	0.630041	2.47914	2.41902	0.216422	2.33553	0.965486	1262.94	26.7869	1265.97	17.5042	1271.09	12.2766	1271.09	12.2766	99.3585
02SS06-23	02SS06	PTr-K	130.121	80970.5	1.88254	11.4559	1.74278	2.76792	1.90173	0.229976	0.761111	0.40022	1334.37	9.17386	1346.93	14.186	1366.91	33.5554	1366.91	33.5554	97.6196
02SS06-91	02SS06	PTr-K	158.7	119092	1.05987	11.4161	1.21705	2.83434	2.96252	0.234677	2.70098	0.911719	1358.96	33.0949	1364.67	22.2393	1373.61	23.4102	1373.61	23.4102	98.9336
02SS06-40	02SS06	PTr-K	250.395	172734	0.844713	11.1535	0.662375	2.95766	1.39796	0.239254	1.23108	0.880624	1382.82	15.3216	1396.81	10.6084	1418.23	12.6627	1418.23	12.6627	97.5032
02SS06-80	02SS06	PTr-K	537.253	58325	2.80333	11.062	0.310355	3.05684	1.49594	0.245248	1.46339	0.978243	1413.92	18.5794	1421.95	11.4458	1433.96	5.92041	1433.96	5.92041	98.6028
02SS06-71	02SS06	PTr-K	290.204	163253	2.39968	11.0229	0.568833	3.10169	1.06763	0.247966	0.903478	0.846243	1427.98	11.5724	1433.11	8.19781	1440.73	10.8414	1440.73	10.8414	99.115
02SS06-1	02SS06	PTr-K	301.69	211867	2.04934	10.6423	0.640762	3.31614	1.28859	0.255958	1.11798	0.867602	1469.13	14.6875	1484.86	10.053	1507.38	12.102	1507.38	12.102	97.4623
02SS06-9	02SS06	PTr-K	435.509	186909	2.19025	10.0145	0.34072	3.74184	0.903255	0.271777	0.836529	0.926126	1549.81	11.5239	1580.37	7.23746	1621.37	6.33884	1621.37	6.33884	95.5865
02SS06-53	02SS06	PTr-K	88.6747	36524	1.23187	9.997	0.978331	3.91361	3.17007	0.283756	3.01533	0.951187	1610.25	42.9657	1616.5	25.6429	1624.62	18.1969	1624.62	18.1969	99.1155
02SS06-30	02SS06	PTr-K	262.51	158544	2.23968	9.94973	0.756861	3.91916	1.3626	0.282815	1.13306	0.831547	1605.53	16.1032	1617.64	11.0234	1633.43	14.0612	1633.43	14.0612	98.2914
02SS06-70	02SS06	PTr-K	570.557	677338	1.8012	9.76372	0.470275	3.57842	2.25279	0.253399	2.20316	0.977969	1455.98	28.7132	1544.76	17.8801	1668.42	8.69709	1668.42	8.69709	87.2671
02SS06-81	02SS06	PTr-K	55.9451	67624.7	1.14779	9.55815	1.68979	4.33408	2.01267	0.300448	1.09336	0.543238	1693.53	16.2839	1699.87	16.6065	1707.68	31.1016	1707.68	31.1016	99.1716
02SS06-34	02SS06	PTr-K	194.224	409976	3.17696	9.55269	0.475856	4.34805	1.04572	0.301245	0.931179	0.890465	1697.48	13.8967	1702.53	8.63288	1708.73	8.75544	1708.73	8.75544	99.3416
02SS06-8	02SS06	PTr-K	388.229	234415	1.65603	9.46285	0.769467	4.287	7.33056	0.294221	7.29007	0.994476	1662.59	106.845	1690.87	60.426	1726.1	14.1297	1726.1	14.1297	96.3206
02SS06-11	02SS06	PTr-K	94.566	69840.3	1.42231	9.43374	1.11629	4.39171	3.58395	0.30048	3.40568	0.950257	1693.69	50.7275	1710.78	29.6499	1731.75	20.4824	1731.75	20.4824	97.8022
02SS06-93	02SS06	PTr-K	717.167	748714	1.3909	9.25222	0.188134	4.48437	1.56874	0.300917	1.55742	0.992783	1695.85	23.2232	1728.08	13.0251	1767.32	3.43693	1767.32	3.43693	95.9562
02SS06-64	02SS06	PTr-K	133.563	69108	2.87047	9.2191	0.643322	4.83999	2.49716	0.323617	2.41287	0.966246	1807.37	38.03	1791.88	21.017	1773.87	11.7413	1773.87	11.7413	101.888
02SS06-44	02SS06	PTr-K	194.889	154687	1.43352	9.20985	0.629974	4.68601	1.12912	0.313007	0.937045	0.829887	1755.49	14.4001	1764.74	9.44886	1775.7	11.4951	1775.7	11.4951	98.8616
02SS06-22	02SS06	PTr-K	107.934	84919.9	1.80922	9.14637	1.12451	4.80175	2.4724	0.318528	2.20187	0.890581	1782.54	34.2904	1785.21	20.7802	1788.31	20.4888	1788.31	20.4888	99.6771
02SS06-35	02SS06	PTr-K	122.029	83822.9	1.09874	8.90378	1.04846	5.02049	1.16982	0.324205	0.518866	0.443543	1810.23	8.18913	1822.78	9.90553	1837.14	18.989	1837.14	18.989	98.5351
02SS06-43	02SS06	PTr-K	118.933	114482	0.893168	8.84311	1.21535	5.17852	1.50852	0.332131	0.893611	0.592377	1848.7	14.3625	1849.09	12.8388	1849.52	21.9792	1849.52	21.9792	99.9559
02SS06-88	02SS06	PTr-K	110.939	83716.7	1.11824	8.75975	0.613189	5.26258	1.51012	0.33434	1.38002	0.913849	1859.38	22.2909	1862.81	12.8858	1866.63	11.0671	1866.63	11.0671	99.6121
02SS06-74	02SS06	PTr-K	86.7245	77163.2	1.46829	8.61405	0.874123	5.71018	1.34915	0.356743	1.02767	0.761719	1966.72	17.4193	1932.91	11.658	1896.84	15.7176	1896.84	15.7176	103.684
02SS06-61	02SS06	PTr-K	91.8879	119110	1.55205	8.55301	0.652309	5.48822	1.95732	0.340447	1.84542	0.942832	1888.82	30.2146	1898.75	16.8127	1909.62	11.7127	1909.62	11.7127	98.9109
02SS06-50	02SS06	PTr-K	469.669	532612	1.64969	8.18302	0.192709	5.655	1.19967	0.335618	1.1841	0.987014	1865.55	19.1809	1924.52	10.3512	1988.64	3.42816	1988.64	3.42816	93.8105
02SS06-10	02SS06	PTr-K	247.589	99196.4	2.25285	6.76916	0.300932	8.23217	2.66248	0.404155	2.64542	0.993592	2188.14	49.0856	2256.89	24.1107	2319.79	5.16066	2319.79	5.16066	94.3251
02SS06-19	02SS06	PTr-K	593.151	380916	2.02777	6.26696	0.172927	9.36229	0.623168	0.425538	0.598694	0.960726	2285.57	11.5208	2374.14	5.71697	2451.06	2.92559	2451.06	2.92559	93.2481
02SS06-75	02SS06	PTr-K	45.786	53439.2	1.1408	5.65061	0.973731	11.6184	1.23231	0.476144	0.755275	0.612893	2510.45	15.7049	2574.15	11.5216	2624.69	16.1949	2624.69	16.1949	95.6476
02SS06-65	02SS06	PTr-K	59.3148	97949.8	1.44969	5.35475	0.506882	13.4889	1.35884	0.523858	1.26076	0.927821	2715.52	27.9397	2714.5	12.8458	2713.74	8.35961	2713.74	8.35961	100.066
02SS06-95	02SS06	PTr-K	83.6988	109620	0.918586	5.31774	0.489014	13.3505	3.25798	0.514898	3.22107	0.988671	2677.51	70.5788	2704.76	30.7852	2725.17	8.05621	2725.17	8.05621	98.251
02SS06-48	02SS06	PTr-K	66.8709	199012	1.56664	5.3121	0.446475	13.7782	1.65875	0.530832	1.59753	0.963094	2744.96	35.7109	2734.58	15.7042	2726.92	7.3542	2726.92	7.3542	100.661
0506111-7	050611-1	PTr-K	1157.47	1692	2.50553	16.8399	3.20841	0.116587	3.65944	0.0142394	1.76	0.480948	91.1455	1.59287	111.974	3.87977	581.171	69.687	91.1455	1.59287	NA	exclude	high U
0506111-8	050611-1	PTr-K	106.659	4740	1.73187	6.26483	2.87688	7.48151	4.26603	0.339936	3.15001	0.738394	1886.36	51.5173	2170.78	38.2274	2451.64	48.6739	2451.64	48.6739	76.943	exclude	low concordance
0506111-1	050611-1	PTr-K	683.099	24212	0.966961	9.88922	1.28162	3.77422	1.88334	0.2707	1.38001	0.732744	1544.35	18.9516	1587.28	15.1188	1644.76	23.7774	1644.76	23.7774	93.8954
0506111-3	050611-1	PTr-K	216.711	10628	2.48266	6.09247	2.4245	9.94427	2.61885	0.439405	0.990035	0.378042	2347.98	19.4828	2429.62	24.1662	2498.72	40.8231	2498.72	40.8231	93.9674
0506112-119	050611-2	PTr-K	1224.16	24864	1.18083	20.1882	3.2047	0.16637	4.02182	0.0243596	2.43	0.604205	155.15	3.72513	156.263	5.82498	173.16	74.8212	155.15	3.72513	NA	exclude	high U
0506112-61	050611-2	PTr-K	1058.6	119256	4.58058	9.18899	3.81001	3.99109	7.36249	0.265985	6.3	0.855689	1520.39	85.3323	1632.38	59.8485	1779.84	69.5162	1779.84	69.5162	85.4231	exclude	high U
0506112-116	050611-2	PTr-K	323.146	10290	2.47473	21.261	7.45981	0.147139	7.52006	0.0226888	0.95	0.126329	144.627	1.35865	139.383	9.79436	50.9737	178.276	144.627	1.35865	NA		isolated young age
0506112-104	050611-2	PTr-K	105.469	5616	3.0412	11.4514	6.84631	2.11859	7.13246	0.175957	2.00001	0.280409	1044.85	19.2915	1154.88	49.2378	1367.67	131.944	1367.67	131.944	76.3966	exclude	low concordance
0506112-7	050611-2	PTr-K	1136.25	11295	0.76784	10.856	2.87365	1.10422	5.40687	0.0869406	4.58	0.847071	537.418	23.6158	755.387	28.8175	1469.74	54.5641	1469.74	54.5641	36.5655	exclude	low concordance
0506112-122	050611-2	PTr-K	474.616	67935	2.61435	9.3678	2.11017	3.40873	2.51589	0.231595	1.37	0.544539	1342.85	16.6074	1506.41	19.754	1744.61	38.6595	1744.61	38.6595	76.9716	exclude	low concordance
0506112-80	050611-2	PTr-K	495.036	67614	3.5328	9.30835	3.11008	3.54568	3.8445	0.239371	2.26	0.587853	1383.43	28.1384	1537.47	30.4579	1756.27	56.9034	1756.27	56.9034	78.7709	exclude	low concordance
0506112-103	050611-2	PTr-K	568.259	21918	9.68111	9.07645	1.71109	3.43886	2.44038	0.226376	1.74	0.713005	1315.48	20.705	1513.32	19.1991	1802.28	31.1233	1802.28	31.1233	72.9894	exclude	low concordance
0506112-84	050611-2	PTr-K	449.023	31494	1.10366	5.744	2.54018	8.46975	7.3152	0.352845	6.86	0.937774	1948.17	115.352	2282.69	66.5287	2597.39	42.3623	2597.39	42.3623	75.0049	exclude	low concordance
0506112-121	050611-2	PTr-K	333.657	80493	1.80534	5.58646	2.44004	9.26754	3.11106	0.375491	1.93	0.620367	2055.19	33.9642	2364.81	28.5201	2643.65	40.5114	2643.65	40.5114	77.7404	exclude	low concordance
0506112-91	050611-2	PTr-K	57.1422	16296	2.46738	5.3847	0.672602	9.96691	0.838096	0.389243	0.500012	0.596604	2119.32	9.03111	2431.72	7.73408	2704.54	11.1024	2704.54	11.1024	78.3616	exclude	low concordance
0506112-5	050611-2	PTr-K	442.347	80319	2.60068	5.38074	2.08003	9.38964	2.77707	0.366428	1.84	0.662569	2012.57	31.8084	2376.82	25.4892	2705.75	34.3269	2705.75	34.3269	74.3813	exclude	low concordance
0506112-86	050611-2	PTr-K	641.19	2664	0.42823	14.1404	6.65736	0.633715	8.42295	0.0649914	5.16	0.612612	405.909	20.2992	498.407	33.1869	949.31	136.387	405.909	20.2992	NA	exclude	off concordia
0506112-102	050611-2	PTr-K	562.705	5760	4.16837	19.3147	3.32893	0.174215	3.74244	0.0244045	1.71	0.456921	155.433	2.62611	163.07	5.63802	275.426	76.2621	155.433	2.62611	NA
0506112-117	050611-2	PTr-K	283.001	2703	1.50563	20.1252	4.62155	0.168652	5.00068	0.0246167	1.91	0.381948	156.768	2.95815	158.248	7.32778	180.443	107.743	156.768	2.95815	NA
0506112-114	050611-2	PTr-K	214.479	4371	3.14897	21.128	7.93509	0.160899	8.15475	0.0246552	1.88	0.23054	157.01	2.91613	151.49	11.4767	65.9415	189.137	157.01	2.91613	NA
0506112-110	050611-2	PTr-K	512.343	13590	3.08138	20.2671	5.33608	0.170232	5.35946	0.0250226	0.5	0.0932931	159.321	0.786841	159.621	7.91643	164.047	124.789	159.321	0.786841	NA
0506112-105	050611-2	PTr-K	264.7	5784	1.5376	19.2952	8.54909	0.178835	8.75552	0.0250266	1.89	0.215864	159.346	2.97472	167.058	13.4877	277.776	196.042	159.346	2.97472	NA
0506112-115	050611-2	PTr-K	214.641	5430	2.76256	21.1337	7.12037	0.163389	7.36438	0.0250436	1.88	0.255283	159.453	2.96095	153.665	10.5022	65.3024	169.702	159.453	2.96095	NA
0506112-125	050611-2	PTr-K	480.383	13662	1.6881	20.3633	4.01492	0.172574	4.1991	0.0254872	1.23	0.29292	162.242	1.97068	161.651	6.2752	153.013	94.0726	162.242	1.97068	NA
0506112-13	050611-2	PTr-K	270.496	7356	1.73805	20.0121	7.81472	0.176731	7.83928	0.0256509	0.62	0.0790889	163.271	0.99957	165.244	11.9553	193.613	181.916	163.271	0.99957	NA
0506112-99	050611-2	PTr-K	242.746	2808	1.85876	19.8129	5.02392	0.178744	5.67533	0.0256849	2.64	0.465171	163.485	4.26173	166.979	8.73863	216.783	116.368	163.485	4.26173	NA
0506112-69	050611-2	PTr-K	454.37	6165	1.90305	20.4585	4.0575	0.173297	4.29551	0.0257136	1.41	0.32825	163.665	2.27863	162.276	6.44219	142.062	95.2636	163.665	2.27863	NA
0506112-57	050611-2	PTr-K	313.719	7428	2.56904	21.1376	6.22372	0.167859	6.46779	0.0257336	1.76	0.272118	163.791	2.84641	157.56	9.4396	64.8584	148.308	163.791	2.84641	NA
0506112-72	050611-2	PTr-K	150.787	3039	3.49299	20.9751	9.14255	0.169339	9.46773	0.0257608	2.46	0.25983	163.962	3.9826	158.845	13.9226	83.1764	217.316	163.962	3.9826	NA
0506112-11	050611-2	PTr-K	413.938	7362	1.54679	20.355	7.25663	0.174708	7.51406	0.0257918	1.95	0.259513	164.157	3.16064	163.496	11.3476	153.961	170.123	164.157	3.16064	NA
0506112-55	050611-2	PTr-K	201.689	3012	2.40584	20.078	5.62755	0.177198	6.11795	0.0258035	2.4	0.392288	164.23	3.89174	165.647	9.35099	185.918	131.112	164.23	3.89174	NA
0506112-38	050611-2	PTr-K	438.161	5475	2.79326	20.9791	6.3639	0.170475	6.66778	0.0259386	1.99	0.29845	165.079	3.24336	159.831	9.86104	82.726	151.134	165.079	3.24336	NA
0506112-56	050611-2	PTr-K	171.081	4077	2.30123	19.4571	8.76219	0.185387	8.84672	0.0261611	1.22	0.137904	166.477	2.00502	172.685	14.0494	258.605	201.654	166.477	2.00502	NA
0506112-73	050611-2	PTr-K	428.014	9711	1.52506	20.6977	4.31163	0.17718	4.37467	0.0265972	0.74	0.169156	169.216	1.23591	165.631	6.68579	114.674	101.734	169.216	1.23591	NA
0506112-8	050611-2	PTr-K	288.781	5844	1.24792	20.0185	9.12013	0.184276	9.13383	0.0267546	0.500001	0.0547416	170.204	0.839886	171.733	14.432	192.865	212.427	170.204	0.839886	NA
0506112-45	050611-2	PTr-K	521.592	8112	2.56253	20.7373	4.65456	0.178388	4.74853	0.0268298	0.94	0.197956	170.676	1.5833	166.673	7.29919	110.195	109.934	170.676	1.5833	NA
0506112-42	050611-2	PTr-K	993.431	8982	1.99739	20.1091	1.30624	0.184637	1.68222	0.0269283	1.06	0.63012	171.295	1.79182	172.043	2.66224	182.314	30.4225	171.295	1.79182	NA
0506112-64	050611-2	PTr-K	353.525	6780	1.7636	20.3334	5.18581	0.182605	5.25181	0.0269291	0.83	0.158041	171.3	1.40307	170.3	8.23421	156.405	121.487	171.3	1.40307	NA
0506112-48	050611-2	PTr-K	481.696	9975	1.04334	20.2617	3.33283	0.183344	3.38122	0.0269427	0.57	0.168578	171.385	0.964026	170.934	5.31941	164.668	77.9171	171.385	0.964026	NA
0506112-79	050611-2	PTr-K	210.921	3966	3.15216	20.4822	11.6341	0.181731	11.7087	0.0269962	1.32	0.112737	171.721	2.2368	169.549	18.285	139.355	273.972	171.721	2.2368	NA
0506112-49	050611-2	PTr-K	264.904	2760	1.92317	20.1091	4.89742	0.185311	4.95759	0.0270267	0.77	0.155318	171.913	1.30623	172.621	7.87006	182.31	114.137	171.913	1.30623	NA
0506112-6	050611-2	PTr-K	196.967	2277	1.66528	17.7253	28.3487	0.210234	28.3689	0.0270267	1.07	0.0377175	171.913	1.81516	193.749	50.0791	468.81	639.338	171.913	1.81516	NA
0506112-34	050611-2	PTr-K	652.118	16218	1.30828	19.8816	5.17101	0.187546	5.47206	0.0270432	1.79	0.327116	172.016	3.03837	174.533	8.77504	208.759	119.948	172.016	3.03837	NA
0506112-17	050611-2	PTr-K	256.454	3360	1.77196	20.0398	5.24885	0.18778	5.39333	0.0272924	1.24	0.229914	173.58	2.12368	174.734	8.65788	190.393	122.178	173.58	2.12368	NA
0506112-39	050611-2	PTr-K	322.526	7095	1.7393	20.3351	6.23044	0.18557	6.25047	0.0273687	0.500001	0.0799941	174.059	0.85865	172.843	9.93431	156.224	145.974	174.059	0.85865	NA
0506112-68	050611-2	PTr-K	107.866	3384	3.97787	15.7885	3.3732	0.867618	7.65346	0.0993503	6.87	0.897634	610.6	40.0234	634.273	36.117	719.548	71.6059	610.6	40.0234	84.8589
0506112-18	050611-2	PTr-K	413.023	38997	3.09093	16.1311	1.44271	0.924749	1.74971	0.10819	0.99	0.565807	662.227	6.23055	664.868	8.53605	673.822	30.8536	662.227	6.23055	98.2793
0506112-109	050611-2	PTr-K	210.594	20850	6.27516	15.3065	2.91232	1.02923	3.33744	0.114259	1.63	0.488398	697.434	10.7748	718.544	17.1896	785.014	61.19	697.434	10.7748	88.8435
0506112-16	050611-2	PTr-K	75.0027	12078	2.12753	13.2188	2.62636	1.94118	3.11234	0.186105	1.67	0.536574	1100.24	16.8916	1095.41	20.8604	1085.82	52.6788	1085.82	52.6788	101.328
0506112-40	050611-2	PTr-K	288.39	46785	2.42046	13.0085	1.93091	2.05307	2.11786	0.193701	0.87	0.410792	1141.39	9.10067	1133.32	14.4618	1117.91	38.5095	1117.91	38.5095	102.101
0506112-85	050611-2	PTr-K	238.95	30279	4.11635	12.8686	2.38023	2.05623	2.58565	0.191911	1.01	0.390617	1131.72	10.4833	1134.37	17.6656	1139.44	47.3653	1139.44	47.3653	99.3227
0506112-15	050611-2	PTr-K	68.7738	9825	1.89021	12.8203	4.55795	1.99392	4.91909	0.185399	1.85	0.376087	1096.4	18.6524	1113.45	33.2765	1146.9	90.5778	1146.9	90.5778	95.5973
0506112-41	050611-2	PTr-K	494.31	10431	2.54938	12.3189	3.35276	1.92591	6.45844	0.172071	5.52	0.854696	1023.51	52.2422	1090.12	43.1911	1225.69	65.8683	1225.69	65.8683	83.5054
0506112-120	050611-2	PTr-K	223.099	30501	0.843078	11.6475	2.40058	2.6748	2.46056	0.225954	0.540001	0.219462	1313.26	6.41592	1321.52	18.1873	1334.92	46.4309	1334.92	46.4309	98.3777
0506112-9	050611-2	PTr-K	186.206	31173	2.88105	11.5408	3.65023	2.79356	4.16223	0.233826	2	0.480511	1354.52	24.4337	1353.81	31.1317	1352.68	70.4384	1352.68	70.4384	100.136
0506112-35	050611-2	PTr-K	20.4725	3207	0.997976	11.4263	4.76613	2.91583	5.06361	0.241638	1.71002	0.337708	1395.21	21.4532	1386.03	38.3032	1371.9	91.7485	1371.9	91.7485	101.699
0506112-98	050611-2	PTr-K	429.968	38076	3.40993	11.1423	0.820731	2.61426	0.96104	0.211262	0.5	0.52027	1235.54	5.62176	1304.65	7.05843	1420.16	15.686	1420.16	15.686	86.9999
0506112-77	050611-2	PTr-K	90.1729	11277	2.90566	11.0973	1.62003	3.07295	1.96383	0.247327	1.11	0.565225	1424.67	14.1884	1425.97	15.0457	1427.89	30.9315	1427.89	30.9315	99.7746
0506112-82	050611-2	PTr-K	185.827	17757	1.15723	11.0059	1.09225	2.74253	1.97043	0.218915	1.64	0.832304	1276.14	18.9874	1340.06	14.6625	1443.66	20.8093	1443.66	20.8093	88.3958
0506112-36	050611-2	PTr-K	184.175	38238	2.59063	10.9792	1.87138	3.05272	1.9911	0.243085	0.680001	0.341521	1402.72	8.57207	1420.92	15.2298	1448.28	35.633	1448.28	35.633	96.8541
0506112-123	050611-2	PTr-K	82.7061	17097	7.94942	10.8985	1.26466	3.00285	2.39171	0.237355	2.03	0.848765	1372.93	25.1027	1408.34	18.22	1462.32	24.0338	1462.32	24.0338	93.8872
0506112-20	050611-2	PTr-K	167.888	7077	3.38835	10.8684	2.03409	3.22207	2.17852	0.25398	0.780003	0.358043	1458.97	10.1841	1462.48	16.8827	1467.57	38.6313	1467.57	38.6313	99.4137
0506112-53	050611-2	PTr-K	95.3747	12711	1.37795	10.68	1.68145	3.37068	1.75422	0.261087	0.500002	0.285028	1495.4	6.67314	1497.61	13.7375	1500.71	31.7902	1500.71	31.7902	99.6461
0506112-118	050611-2	PTr-K	55.5623	7629	2.69534	10.5428	2.39117	3.23021	2.54453	0.246993	0.870025	0.34192	1422.95	11.1089	1464.44	19.7315	1525.11	45.0659	1525.11	45.0659	93.3017
0506112-67	050611-2	PTr-K	817.327	44892	1.61583	9.85455	3.60004	3.61373	4.18807	0.25828	2.14	0.510975	1481.04	28.3171	1552.56	33.3199	1651.27	66.7532	1651.27	66.7532	89.6906
0506112-33	050611-2	PTr-K	181.507	27627	2.28102	9.78365	0.962286	3.36563	7.34332	0.238817	7.28	0.991377	1380.55	90.4767	1496.43	57.5449	1664.64	17.8068	1664.64	17.8068	82.9333
0506112-47	050611-2	PTr-K	117.321	35253	1.49065	9.56975	3.10103	4.44144	4.34959	0.308264	3.05	0.701216	1732.16	46.329	1720.1	36.0637	1705.44	57.1002	1705.44	57.1002	101.566
0506112-83	050611-2	PTr-K	190.582	34935	1.89461	9.53309	1.25082	4.01369	1.43337	0.277509	0.700001	0.488361	1578.8	9.80234	1636.97	11.6518	1712.51	23.0068	1712.51	23.0068	92.1927
0506112-65	050611-2	PTr-K	144.234	32880	1.99039	9.40424	2.86018	4.53002	3.05028	0.308975	1.06	0.347509	1735.66	16.1293	1736.5	25.3766	1737.5	52.4513	1737.5	52.4513	99.8942
0506112-51	050611-2	PTr-K	185.927	37524	1.99706	9.38649	2.84029	4.15525	3.93956	0.282878	2.73	0.692971	1605.84	38.8061	1665.24	32.2531	1740.96	52.0638	1740.96	52.0638	92.2387
0506112-113	050611-2	PTr-K	177.016	21024	2.85342	9.332	2.78018	4.43188	5.44351	0.299959	4.68	0.85974	1691.11	69.6167	1718.32	45.1266	1751.62	50.8938	1751.62	50.8938	96.5452
0506112-70	050611-2	PTr-K	200.517	40983	2.17499	9.31106	2.33021	4.48818	2.94447	0.303087	1.8	0.611317	1706.6	26.989	1728.79	24.4547	1755.73	42.6332	1755.73	42.6332	97.2016
0506112-112	050611-2	PTr-K	99.2574	25356	2.06542	9.2603	1.29342	4.07321	1.46596	0.273565	0.690003	0.470684	1558.87	9.55453	1648.96	11.9516	1765.73	23.6328	1765.73	23.6328	88.2851
0506112-50	050611-2	PTr-K	606.585	95283	3.0245	9.23997	2.58005	4.40282	2.90268	0.295053	1.33	0.458197	1666.73	19.5337	1712.87	24.0226	1769.74	47.1222	1769.74	47.1222	94.1793
0506112-78	050611-2	PTr-K	393.153	76263	6.83697	9.23189	2.15019	4.1854	2.20755	0.280237	0.5	0.226495	1592.56	7.05544	1671.16	18.0943	1771.34	39.2623	1771.34	39.2623	89.9069
0506112-74	050611-2	PTr-K	350.455	61116	4.8838	9.19688	2.21005	4.60625	3.72617	0.307246	3	0.805117	1727.14	45.4544	1750.4	31.0959	1778.27	40.3193	1778.27	40.3193	97.1247
0506112-32	050611-2	PTr-K	81.2985	16866	1.33195	9.18222	1.50084	4.81993	2.05244	0.320987	1.4	0.682114	1794.55	21.9299	1788.38	17.261	1781.18	27.371	1781.18	27.371	100.75
0506112-124	050611-2	PTr-K	228.805	38604	2.50876	9.17801	2.3906	4.59687	3.1492	0.305991	2.05	0.650959	1720.95	30.9631	1748.7	26.269	1782.02	43.5945	1782.02	43.5945	96.5731
0506112-87	050611-2	PTr-K	384.825	82839	2.42577	9.11917	1.95023	4.81086	2.15634	0.318183	0.92	0.42665	1780.85	14.3156	1786.8	18.1291	1793.74	35.5116	1793.74	35.5116	99.2815
0506112-46	050611-2	PTr-K	358.403	59184	2.02865	9.0799	2.56009	4.4713	3.26105	0.294451	2.02	0.619432	1663.73	29.621	1725.66	27.0666	1801.59	46.576	1801.59	46.576	92.348
0506112-52	050611-2	PTr-K	59.9776	14424	0.955149	9.05068	2.90057	4.94473	2.99596	0.32458	0.750002	0.250337	1812.06	11.8474	1809.92	25.3085	1807.45	52.7336	1807.45	52.7336	100.255
0506112-37	050611-2	PTr-K	349.417	34737	2.53636	9.03332	2.50089	3.94694	6.50034	0.258587	6	0.923028	1482.61	79.4721	1623.36	52.7084	1810.94	45.4445	1810.94	45.4445	81.8695
0506112-106	050611-2	PTr-K	362.146	79755	3.95865	9.01977	1.81005	4.63357	1.95171	0.303117	0.73	0.374031	1706.75	10.9463	1755.34	16.301	1813.67	32.8798	1813.67	32.8798	94.1047
0506112-63	050611-2	PTr-K	391.914	73599	5.04558	9.01423	2.19008	4.91122	2.4419	0.321082	1.08	0.442279	1795.01	16.9211	1804.19	20.6029	1814.79	39.7758	1814.79	39.7758	98.9105
0506112-59	050611-2	PTr-K	261.376	63321	1.06309	9.00783	2.07006	5.02971	2.14711	0.328596	0.57	0.265474	1831.57	9.08788	1824.34	18.1876	1816.07	37.5894	1816.07	37.5894	100.853
0506112-19	050611-2	PTr-K	65.8604	20133	1.81014	8.97712	1.26363	5.02191	1.67534	0.326967	1.1	0.656584	1823.67	17.4726	1823.02	14.1872	1822.27	22.9283	1822.27	22.9283	100.077
0506112-4	050611-2	PTr-K	134.154	24081	1.00382	8.96714	2.03065	4.36671	2.0913	0.283993	0.500001	0.239086	1611.44	7.1291	1706.06	17.2797	1824.29	36.8383	1824.29	36.8383	88.3325
0506112-96	050611-2	PTr-K	319.144	58290	4.22175	8.9404	1.33056	4.77824	3.35512	0.30983	3.08	0.918001	1739.87	46.9662	1781.08	28.1787	1829.7	24.1192	1829.7	24.1192	95.0904
0506112-62	050611-2	PTr-K	696.881	134274	5.36939	8.90805	1.28002	5.08222	2.04122	0.328348	1.59	0.778948	1830.37	25.3361	1833.14	17.3202	1836.27	23.1843	1836.27	23.1843	99.6784
0506112-43	050611-2	PTr-K	220.655	44661	2.08278	8.85299	2.88009	5.17606	3.06552	0.332344	1.05	0.34252	1849.73	16.8842	1848.69	26.0926	1847.5	52.1061	1847.5	52.1061	100.121
0506112-71	050611-2	PTr-K	170.523	27228	2.15721	8.81205	1.57126	5.15894	2.10449	0.329713	1.4	0.665246	1836.99	22.3783	1845.87	17.9009	1855.87	28.3951	1855.87	28.3951	98.9824
0506112-66	050611-2	PTr-K	196.029	31578	3.86649	8.80915	2.31008	5.01994	3.93051	0.320724	3.18	0.809056	1793.27	49.7821	1822.69	33.292	1856.47	41.7439	1856.47	41.7439	96.5955
0506112-90	050611-2	PTr-K	142.995	25614	2.36228	8.73072	1.36102	5.28396	1.53508	0.334586	0.710002	0.462517	1860.57	11.4747	1866.27	13.1072	1872.61	24.5435	1872.61	24.5435	99.357
0506112-31	050611-2	PTr-K	289.83	63567	2.53791	5.86478	4.48002	9.38664	8.5055	0.399264	7.23	0.850038	2165.65	133.008	2376.53	78.2028	2562.64	74.99	2562.64	74.99	84.5088
0506112-76	050611-2	PTr-K	215.575	75003	1.45679	5.74002	2.02006	10.5168	4.47222	0.437819	3.99	0.892175	2340.87	78.3254	2481.4	41.4903	2598.54	33.6817	2598.54	33.6817	90.0839
0506112-107	050611-2	PTr-K	296.366	71406	0.789136	5.60626	2.01001	9.66128	4.60215	0.392832	4.14	0.89958	2135.95	75.2742	2403.02	42.3709	2637.78	33.3882	2637.78	33.3882	80.9752
0506112-58	050611-2	PTr-K	143.743	40302	1.45795	5.50639	1.74005	12.6999	1.87933	0.507184	0.710001	0.377794	2644.6	15.402	2657.65	17.6913	2667.59	28.8177	2667.59	28.8177	99.1381
0506112-81	050611-2	PTr-K	190.895	42012	2.92889	5.42785	2.64003	12.3569	3.6017	0.486448	2.45	0.680234	2555.29	51.6869	2631.91	33.8456	2691.35	43.6326	2691.35	43.6326	94.9445
0506112-97	050611-2	PTr-K	211.356	52842	1.33757	5.30673	2.31003	12.747	3.6531	0.490605	2.83	0.774684	2573.29	60.0464	2661.13	34.4079	2728.58	38.0473	2728.58	38.0473	94.3088
0506112-54	050611-2	PTr-K	84.8817	47205	1.47766	4.50771	1.36008	18.1372	1.44908	0.592958	0.500003	0.345049	3001.4	11.998	2997.04	13.9457	2994.1	21.8745	2994.1	21.8745	100.244
0506112-12	050611-2	PTr-K	109.406	45330	1.21656	4.46702	1.88003	18.5604	1.99585	0.601317	0.670001	0.335698	3035.14	16.2189	3019.25	19.2317	3008.67	30.2023	3008.67	30.2023	100.88
0506112-14	050611-2	PTr-K	172.175	86883	2.41567	3.55978	2.35	26.7044	2.42293	0.689454	0.59	0.243506	3380.53	15.5214	3372.69	23.7184	3368.02	36.6797	3368.02	36.6797	100.371
0506113-98	050611-3	PTr-K	1534	213234	7.6	10.1537	2	3.0367	2.8	0.2236	2	0.72	1301	24	1416.9	21.6	1595.6	36.4	1595.6	36.4	81.5367	exclude	high U
0506113-8	050611-3	PTr-K	1533	4500	2	9.3751	3.7	1.1143	4.7	0.0758	2.9	0.62	470.8	13.2	760.3	25.2	1743.2	67.9	1743.2	67.9	NA	exclude	high U
0506113-45	050611-3	PTr-K	1464	12879	5.3	8.658	3.8	1.2026	4.5	0.0755	2.3	0.52	469.3	10.6	801.8	24.9	1887.7	69	1887.7	69	NA	exclude	high U
0506113-73	050611-3	PTr-K	443	45270	19.8	9.2891	3.1	4.7578	3.3	0.3205	1.4	0.4	1792.4	21.1	1777.5	28.1	1760	56	1760	56	101.841	exclude	high U/Th
0506113-112	050611-3	PTr-K	432	107349	11.3	9.1134	1	4.7269	1.2	0.3124	0.6	0.52	1752.7	9.7	1772	10.2	1794.9	18.9	1794.9	18.9	97.6489	exclude	high U/Th
0506113-37	050611-3	PTr-K	576	47928	3.2	12.614	2.5	1.6851	2.8	0.1542	1.3	0.46	924.2	11	1002.9	17.7	1179.1	48.7	1179.1	48.7	78.3818	exclude	low concordance
0506113-94	050611-3	PTr-K	386	55398	1.5	9.5297	1.3	3.1374	3	0.2168	2.8	0.9	1265.2	31.6	1441.9	23.4	1713.2	23.9	1713.2	23.9	73.8501	exclude	low concordance
0506113-2	050611-3	PTr-K	370	57777	3.9	9.3876	1.7	3.4136	2.2	0.2324	1.5	0.67	1347.1	18	1507.5	17.4	1740.7	30.2	1740.7	30.2	77.3884	exclude	low concordance
0506113-131	050611-3	PTr-K	701	81927	2.4	9.3032	1.5	3.608	2	0.2434	1.4	0.67	1404.6	17.3	1551.3	16.2	1757.3	27.4	1757.3	27.4	79.9294	exclude	low concordance
0506113-43	050611-3	PTr-K	401	32940	2.7	9.1989	3.2	3.5064	7.7	0.2339	7	0.91	1355.1	85.3	1528.7	60.6	1777.9	57.9	1777.9	57.9	76.2191	exclude	low concordance
0506113-21	050611-3	PTr-K	436	50214	6.7	9.0156	3	3.7963	3.4	0.2482	1.6	0.47	1429.3	20.6	1592	27.4	1814.5	54.5	1814.5	54.5	78.771	exclude	low concordance
0506113-48	050611-3	PTr-K	629	18249	4.3	8.9044	2.1	3.6472	7.7	0.2355	7.4	0.96	1363.5	91.2	1559.9	61.6	1837	38.6	1837	38.6	74.2243	exclude	low concordance
0506113-70	050611-3	PTr-K	480	22188	2.4	8.6137	8.6	3.8448	9.4	0.2402	3.8	0.4	1387.7	47.1	1602.2	76	1896.9	155.3	1896.9	155.3	73.1562	exclude	low concordance
0506113-20	050611-3	PTr-K	201	41286	1.7	6.2977	4	6.7044	4.8	0.3062	2.7	0.56	1722.1	40.5	2073.2	42.6	2442.8	67.9	2442.8	67.9	70.497	exclude	low concordance
0506113-50	050611-3	PTr-K	368	26655	1.2	5.7397	4.2	8.7555	5.2	0.3645	3.1	0.59	2003.3	53.4	2312.9	47.7	2598.6	70.2	2598.6	70.2	77.0915	exclude	low concordance
0506113-26	050611-3	PTr-K	1086	16407	2.1	5.71	2.6	2.2224	3	0.092	1.5	0.5	567.6	8.1	1188.1	21.2	2607.3	43.8	2607.3	43.8	21.7696	exclude	low concordance
0506113-69	050611-3	PTr-K	263	23379	1.4	5.5879	4.8	8.8989	5.2	0.3606	1.9	0.37	1985.2	32.5	2327.7	47.2	2643.2	79.9	2643.2	79.9	75.1059	exclude	low concordance
0506113-118	050611-3	PTr-K	309	5820	1.7	21.2714	7.9	0.1351	9.2	0.0208	4.7	0.51	133	6.2	128.7	11.1	49.8	188.8	133	6.2	NA
0506113-107	050611-3	PTr-K	143	2616	2.3	21.0353	9.7	0.1383	10.1	0.0211	2.9	0.29	134.6	3.9	131.6	12.5	76.4	231.2	134.6	3.9	NA
0506113-116	050611-3	PTr-K	253	4947	2	20.6508	12	0.1448	12.3	0.0217	2.9	0.24	138.3	4	137.3	15.8	120.1	283.2	138.3	4	NA
0506113-33	050611-3	PTr-K	158	2004	2.2	20.0259	11.7	0.1521	11.8	0.0221	1.1	0.1	140.9	1.6	143.8	15.8	192	273.4	140.9	1.6	NA
0506113-108	050611-3	PTr-K	49	981	2.9	17.9836	26.7	0.1702	26.9	0.0222	2.8	0.1	141.5	3.9	159.6	39.7	436.7	604.7	141.5	3.9	NA
0506113-113	050611-3	PTr-K	215	3777	1.8	20.4236	6	0.1501	6.8	0.0222	3.1	0.46	141.8	4.4	142	9	146.1	141.1	141.8	4.4	NA
0506113-104	050611-3	PTr-K	118	3399	2.7	22.3495	15.7	0.1373	15.8	0.0223	2.4	0.15	141.9	3.3	130.6	19.4	-69.6	384.7	141.9	3.3	NA
0506113-101	050611-3	PTr-K	146	4257	2.4	21.7961	11	0.1413	11.4	0.0223	3	0.26	142.4	4.2	134.2	14.3	-8.7	265.2	142.4	4.2	NA
0506113-102	050611-3	PTr-K	142	4113	2.3	21.5912	14.3	0.1434	14.3	0.0225	0.7	0.05	143.1	0.9	136	18.2	14.1	345.4	143.1	0.9	NA
0506113-125	050611-3	PTr-K	116	2343	2.3	21.3881	12.4	0.1465	12.5	0.0227	1.5	0.12	144.9	2.2	138.8	16.3	36.7	298.7	144.9	2.2	NA
0506113-122	050611-3	PTr-K	74	1548	2.5	21.3393	16.5	0.1471	16.7	0.0228	2.6	0.15	145.1	3.7	139.3	21.7	42.2	396.8	145.1	3.7	NA
0506113-111	050611-3	PTr-K	273	6441	1.7	20.8756	5.6	0.1506	5.7	0.0228	1	0.18	145.3	1.5	142.4	7.6	94.4	133	145.3	1.5	NA
0506113-121	050611-3	PTr-K	142	2958	1.8	20.7533	7.8	0.1517	8.7	0.0228	4	0.46	145.5	5.7	143.4	11.7	108.4	183.5	145.5	5.7	NA
0506113-93	050611-3	PTr-K	161	3201	1.9	22.222	8.6	0.1422	8.9	0.0229	2.2	0.25	146.1	3.2	135	11.3	-55.6	210.5	146.1	3.2	NA
0506113-109	050611-3	PTr-K	190	4950	2.2	19.7486	11	0.1602	11.4	0.023	3.2	0.28	146.3	4.6	150.9	16	224.3	254	146.3	4.6	NA
0506113-130	050611-3	PTr-K	148	3561	1.8	22.004	13.8	0.1438	13.9	0.023	1.2	0.08	146.3	1.7	136.5	17.7	-31.6	337	146.3	1.7	NA
0506113-105	050611-3	PTr-K	131	2688	1.5	21.8088	12.7	0.1455	12.8	0.023	1.6	0.12	146.7	2.3	137.9	16.5	-10.1	306.7	146.7	2.3	NA
0506113-11	050611-3	PTr-K	221	3939	1.6	20.9853	5.8	0.1514	5.9	0.023	1.1	0.18	146.9	1.6	143.2	7.9	82	138.1	146.9	1.6	NA
0506113-114	050611-3	PTr-K	874	15918	1.9	20.4349	4.6	0.1566	4.7	0.0232	0.8	0.18	147.9	1.2	147.7	6.5	144.7	108.6	147.9	1.2	NA
0506113-119	050611-3	PTr-K	117	2697	2.2	22.1754	15.1	0.1443	15.3	0.0232	2.1	0.14	147.9	3.1	136.8	19.5	-50.5	369.5	147.9	3.1	NA
0506113-55	050611-3	PTr-K	266	6978	1.9	21.6838	8.2	0.1478	8.5	0.0232	1.9	0.22	148.1	2.7	140	11.1	3.7	199	148.1	2.7	NA
0506113-124	050611-3	PTr-K	155	4596	1.9	21.1697	7.6	0.1519	7.8	0.0233	1.5	0.19	148.7	2.1	143.6	10.4	61.2	182.3	148.7	2.1	NA
0506113-89	050611-3	PTr-K	116	2400	2.1	21.5857	14	0.1495	14.5	0.0234	3.7	0.26	149.1	5.5	141.4	19.1	14.6	337.8	149.1	5.5	NA
0506113-127	050611-3	PTr-K	141	3303	2.1	20.6139	7.6	0.157	7.9	0.0235	1.9	0.25	149.5	2.9	148.1	10.8	124.2	179.9	149.5	2.9	NA
0506113-103	050611-3	PTr-K	134	3459	3.4	22.9547	16.3	0.1412	16.7	0.0235	3.5	0.21	149.8	5.2	134.1	21	-135.2	405.6	149.8	5.2	NA
0506113-91	050611-3	PTr-K	93	1662	1.7	23.4088	15.5	0.1393	15.6	0.0237	1.8	0.11	150.7	2.6	132.4	19.4	-183.9	390	150.7	2.6	NA
0506113-88	050611-3	PTr-K	133	2448	1.6	23.0991	13.9	0.1416	14.6	0.0237	4.3	0.29	151.1	6.3	134.4	18.3	-150.8	347	151.1	6.3	NA
0506113-132	050611-3	PTr-K	122	3810	2.6	21.8779	10.6	0.1497	10.7	0.0238	1.1	0.11	151.3	1.7	141.6	14.1	-17.7	258	151.3	1.7	NA
0506113-92	050611-3	PTr-K	94	2043	1.8	22.342	39.1	0.1487	39.2	0.0241	3.1	0.08	153.5	4.7	140.8	51.6	-68.7	987.7	153.5	4.7	NA
0506113-115	050611-3	PTr-K	107	1119	2.1	16.2064	13.2	0.2061	13.3	0.0242	2.1	0.16	154.3	3.2	190.3	23.1	663.9	283	154.3	3.2	NA
0506113-59	050611-3	PTr-K	134	1908	2.1	21.7061	10.2	0.1542	10.2	0.0243	0.7	0.07	154.7	1.1	145.7	13.9	1.3	246.8	154.7	1.1	NA
0506113-97	050611-3	PTr-K	84	2028	2.3	26.1674	23.8	0.1282	23.8	0.0243	2	0.08	154.9	3	122.4	27.5	-470.2	635.9	154.9	3	NA
0506113-67	050611-3	PTr-K	224	3738	1.1	21.4447	5.4	0.1566	5.5	0.0244	0.8	0.14	155.1	1.1	147.7	7.5	30.4	130.3	155.1	1.1	NA
0506113-72	050611-3	PTr-K	169	20028	2.9	13.2717	3	1.9891	3.2	0.1915	1.2	0.38	1129.3	12.8	1111.8	21.9	1077.8	60.1	1077.8	60.1	104.778
0506113-68	050611-3	PTr-K	169	12750	1.9	12.3083	2.9	2.1678	6.2	0.1935	5.5	0.88	1140.4	57	1170.8	43.1	1227.4	57.8	1227.4	57.8	92.9118
0506113-63	050611-3	PTr-K	83	10872	1.4	11.3228	3	3.0462	3.4	0.2502	1.7	0.49	1439.3	21.8	1419.3	26.3	1389.4	57.5	1389.4	57.5	103.591
0506113-35	050611-3	PTr-K	245	44187	2.5	11.0651	3.9	2.5568	4.5	0.2052	2.4	0.52	1203.1	25.8	1288.4	33	1433.4	73.7	1433.4	73.7	83.9333
0506113-47	050611-3	PTr-K	186	30822	1.7	10.9973	3.5	3.0518	3.7	0.2434	1.3	0.34	1404.4	16	1420.7	28.5	1445.1	66.7	1445.1	66.7	97.1836
0506113-12	050611-3	PTr-K	59	14628	2	10.8385	1.6	3.2693	1.8	0.257	0.9	0.48	1474.4	11.3	1473.8	13.9	1472.8	29.9	1472.8	29.9	100.109
0506113-22	050611-3	PTr-K	74	21264	4.6	10.8155	2.6	3.3584	3.1	0.2634	1.8	0.57	1507.4	23.9	1494.7	24.3	1476.8	48.4	1476.8	48.4	102.072
0506113-54	050611-3	PTr-K	167	16242	1.1	10.7027	1.9	3.0389	2.5	0.2359	1.6	0.65	1365.3	19.7	1417.5	18.9	1496.7	35.8	1496.7	35.8	91.2207
0506113-71	050611-3	PTr-K	157	33627	2.1	10.4696	1.8	3.5857	2.4	0.2723	1.6	0.68	1552.3	22.6	1546.4	19.1	1538.2	33.1	1538.2	33.1	100.917
0506113-16	050611-3	PTr-K	84	17430	2.8	9.9288	2.5	3.9038	3.3	0.2811	2.2	0.65	1597	30.4	1614.5	26.8	1637.3	46.7	1637.3	46.7	97.5386
0506113-123	050611-3	PTr-K	158	17124	0.8	9.6122	1.3	4.3374	2.1	0.3024	1.6	0.77	1703.1	23.8	1700.5	17	1697.3	24.2	1697.3	24.2	100.342
0506113-62	050611-3	PTr-K	290	20208	1.9	9.4701	3.3	3.6711	6.4	0.2521	5.5	0.86	1449.5	71	1565.1	51	1724.7	60.7	1724.7	60.7	84.0436
0506113-51	050611-3	PTr-K	237	30975	3.7	9.4326	2.4	4.0152	3.5	0.2747	2.5	0.72	1564.6	35.1	1637.3	28.5	1732	44.4	1732	44.4	90.3349
0506113-40	050611-3	PTr-K	439	51573	2.6	9.3195	2.4	3.7606	3.3	0.2542	2.3	0.7	1460	30.6	1584.4	26.7	1754.1	43.2	1754.1	43.2	83.2336
0506113-4	050611-3	PTr-K	326	57099	1.9	9.2896	1.8	4.7423	1.9	0.3195	0.5	0.27	1787.4	7.8	1774.8	15.6	1759.9	32.7	1759.9	32.7	101.563
0506113-10	050611-3	PTr-K	496	51405	2.2	9.2729	2.4	4.1137	2.7	0.2767	1.3	0.48	1574.5	18.3	1657	22.2	1763.2	43.5	1763.2	43.5	89.2979
0506113-6	050611-3	PTr-K	333	33978	3.4	9.2404	2.7	4.3567	2.7	0.292	0.5	0.19	1651.4	7.3	1704.2	22.3	1769.7	48.4	1769.7	48.4	93.3153
0506113-78	050611-3	PTr-K	557	93027	6.9	9.2195	1.6	4.2083	2.7	0.2814	2.1	0.8	1598.4	30.3	1675.6	22.1	1773.8	29.8	1773.8	29.8	90.1116
0506113-85	050611-3	PTr-K	323	40227	2.3	9.2137	3.9	4.566	4.4	0.3051	2.2	0.5	1716.6	33.3	1743.1	37	1774.9	70.3	1774.9	70.3	96.7153
0506113-76	050611-3	PTr-K	302	58362	2.6	9.1951	2.8	4.4389	3.2	0.296	1.6	0.49	1671.6	23.1	1719.6	26.3	1778.6	50.4	1778.6	50.4	93.984
0506113-52	050611-3	PTr-K	333	85401	1.9	9.1934	3	4.768	3.1	0.3179	0.8	0.25	1779.5	12	1779.3	26.3	1779	55.5	1779	55.5	100.028
0506113-128	050611-3	PTr-K	195	46143	3.3	9.1839	1.2	4.7138	1.4	0.314	0.7	0.49	1760.2	10.3	1769.7	11.4	1780.8	21.5	1780.8	21.5	98.8432
0506113-126	050611-3	PTr-K	373	90978	3	9.1778	0.6	4.7169	1.4	0.314	1.3	0.91	1760.2	19.7	1770.2	11.8	1782	10.9	1782	10.9	98.7767
0506113-44	050611-3	PTr-K	266	57666	2	9.177	2.4	4.7283	2.8	0.3147	1.4	0.51	1763.8	22.1	1772.3	23.6	1782.2	44.1	1782.2	44.1	98.9676
0506113-31	050611-3	PTr-K	846	108195	9.5	9.1481	3.4	4.2605	4.8	0.2827	3.5	0.72	1604.8	49	1685.8	39.6	1788	61.2	1788	61.2	89.7539
0506113-27	050611-3	PTr-K	252	47043	2.1	9.1287	2.8	4.5087	3.3	0.2985	1.7	0.51	1683.9	24.6	1732.6	27.3	1791.8	51.6	1791.8	51.6	93.9781
0506113-13	050611-3	PTr-K	489	31953	3.4	9.1137	3	4.1247	3.2	0.2726	1.2	0.38	1554.2	17	1659.2	26.5	1794.8	54.6	1794.8	54.6	86.5946
0506113-42	050611-3	PTr-K	399	43152	7.7	9.0442	2.7	3.9063	9.6	0.2562	9.2	0.96	1470.5	120.9	1615	77.7	1808.8	49.8	1808.8	49.8	81.297
0506113-58	050611-3	PTr-K	429	35094	3	9.0092	1.6	3.9798	2.6	0.26	2.1	0.79	1490	27.7	1630.1	21.4	1815.8	29.6	1815.8	29.6	82.0575
0506113-134	050611-3	PTr-K	175	48522	3.2	8.9665	2.1	4.8899	2.3	0.318	0.9	0.4	1780	14	1800.5	19.2	1824.4	37.9	1824.4	37.9	97.5663
0506113-60	050611-3	PTr-K	674	73161	9.6	8.9548	2.2	5.1334	2.4	0.3334	1	0.41	1854.8	15.6	1841.6	20	1826.8	39	1826.8	39	101.533
0506113-28	050611-3	PTr-K	569	64722	6.7	8.9493	2.6	4.6018	3	0.2987	1.6	0.52	1684.8	23.4	1749.6	25.2	1827.9	46.6	1827.9	46.6	92.1713
0506113-90	050611-3	PTr-K	413	77700	6.4	8.9249	2.6	5.1354	2.7	0.3324	0.7	0.24	1850.1	10.6	1842	23.1	1832.9	47.8	1832.9	47.8	100.938
0506113-133	050611-3	PTr-K	291	76065	1.9	8.922	1.3	4.9936	1.9	0.3231	1.3	0.71	1805	20.9	1818.2	15.8	1833.4	23.7	1833.4	23.7	98.451
0506113-110	050611-3	PTr-K	130	31254	2.7	8.9073	2.3	4.9292	3.3	0.3184	2.4	0.72	1782.1	36.6	1807.3	27.5	1836.4	40.9	1836.4	40.9	97.0431
0506113-120	050611-3	PTr-K	192	47481	2.3	8.8255	1.6	4.4629	1.8	0.2857	0.8	0.45	1619.8	11.3	1724.1	14.6	1853.1	28.4	1853.1	28.4	87.4103
0506113-24	050611-3	PTr-K	353	34887	3.3	8.7906	2.9	4.7945	3.1	0.3057	1.2	0.37	1719.4	17.5	1783.9	26.3	1860.3	52.4	1860.3	52.4	92.426
0506113-87	050611-3	PTr-K	206	46059	3.9	8.7668	3.3	5.3518	3.5	0.3403	1.3	0.36	1888	20.9	1877.2	30.3	1865.2	59.6	1865.2	59.6	101.222
0506113-129	050611-3	PTr-K	146	41421	2.3	8.7606	1.4	5.1734	2.2	0.3287	1.6	0.75	1832.1	26	1848.3	18.5	1866.4	25.8	1866.4	25.8	98.1622
0506113-53	050611-3	PTr-K	195	17115	2.2	8.7227	4.4	4.3226	4.6	0.2735	1.4	0.3	1558.3	19.2	1697.7	38.2	1874.3	79.7	1874.3	79.7	83.1404
0506113-83	050611-3	PTr-K	87	22956	4.4	8.6458	2	5.4971	2.1	0.3447	0.9	0.41	1909.2	14.7	1900.1	18.4	1890.2	35.1	1890.2	35.1	101.005
0506113-57	050611-3	PTr-K	208	52356	2	8.6253	2.5	5.56	2.7	0.3478	0.9	0.35	1924.2	15.6	1909.9	22.9	1894.5	44.8	1894.5	44.8	101.568
0506113-1	050611-3	PTr-K	109	19617	4	8.5298	1.6	5.2453	2.1	0.3245	1.4	0.67	1811.6	22.6	1860	18.2	1914.5	28.6	1914.5	28.6	94.6252
0506113-14	050611-3	PTr-K	816	138186	8.1	7.0828	1.8	6.8926	4.3	0.3541	3.9	0.91	1954	66.4	2097.7	38.2	2241.8	30.3	2241.8	30.3	87.1621
0506113-39	050611-3	PTr-K	325	92826	6.7	6.2748	2.9	8.3563	4.8	0.3803	3.8	0.8	2077.6	67.5	2270.4	43.3	2448.9	48.7	2448.9	48.7	84.8381
0506113-99	050611-3	PTr-K	143	45588	1.8	5.9808	1.4	11.1832	1.9	0.4851	1.3	0.67	2549.4	27.2	2538.5	18	2529.8	24.2	2529.8	24.2	100.775
0506113-17	050611-3	PTr-K	244	35268	1.5	5.9574	3.2	8.6779	3.6	0.3749	1.7	0.47	2052.6	29.9	2304.8	32.9	2536.4	53.5	2536.4	53.5	80.9257
0506113-25	050611-3	PTr-K	205	86139	1	5.6899	3.4	11.4387	3.6	0.472	1.1	0.3	2492.5	22.5	2559.6	33.5	2613.1	57	2613.1	57	95.3848
0506113-66	050611-3	PTr-K	375	81348	2.8	5.6903	2.4	11.4542	3	0.4727	1.9	0.64	2495.4	40.1	2560.9	28.5	2613.1	39.1	2613.1	39.1	95.4958
0506113-34	050611-3	PTr-K	454	11301	1.7	5.6526	3.4	9.9487	4	0.4079	2.2	0.54	2205.2	40.5	2430	37.1	2624.1	56.3	2624.1	56.3	84.0364
0506113-32	050611-3	PTr-K	320	122439	5.4	5.6287	2.4	10.0783	3	0.4114	1.8	0.59	2221.4	33.1	2442	27.6	2631.1	40.1	2631.1	40.1	84.4286
0506113-61	050611-3	PTr-K	529	60669	1.3	5.6289	3.5	10.341	5.3	0.4222	3.9	0.75	2270.3	75.4	2465.8	49	2631.1	58.5	2631.1	58.5	86.2871
0506113-117	050611-3	PTr-K	373	120651	1.6	5.6077	1	11.2291	1.8	0.4567	1.5	0.83	2425	29.5	2542.3	16.3	2637.4	16.1	2637.4	16.1	91.9466
0506113-84	050611-3	PTr-K	283	69504	1.7	5.582	2.6	12.5158	2.7	0.5067	0.8	0.3	2642.5	18	2643.9	25.8	2645	43.3	2645	43.3	99.9055
0506113-106	050611-3	PTr-K	50	23934	3.2	5.401	1.2	12.7851	1.8	0.5008	1.4	0.77	2617.3	29.9	2664	17.1	2699.6	19.2	2699.6	19.2	96.9514
0506113-49	050611-3	PTr-K	96	38409	2.9	5.393	2.9	12.6007	3	0.4929	1	0.34	2583	22.1	2650.3	28.6	2702	47.2	2702	47.2	95.5959
0506113-15	050611-3	PTr-K	361	74862	3	5.3373	2.7	11.126	3.6	0.4307	2.4	0.67	2308.8	46.8	2533.7	33.5	2719.1	43.8	2719.1	43.8	84.9104
0506113-30	050611-3	PTr-K	301	82881	3.1	5.06	1.3	13.0285	4.2	0.4781	4	0.95	2519.1	84	2681.7	40	2806.7	21.3	2806.7	21.3	89.7531
0506113-80	050611-3	PTr-K	171	40317	1.5	4.9187	1.9	15.5888	2	0.5561	0.7	0.36	2850.5	17	2851.9	19.4	2852.9	30.8	2852.9	30.8	99.9159
0506113-95	050611-3	PTr-K	143	19530	2.3	4.2064	3.8	15.9944	5.6	0.488	4.2	0.74	2561.8	88.6	2876.5	53.9	3104.8	60	3104.8	60	82.511
07SS10-1	07SS10	pre-Mz	62.728	1569	0.782265	14.8954	2.20083	1.27964	8.12381	0.138241	7.82001	0.962604	834.711	61.2269	836.691	46.3353	841.933	45.8122	834.711	61.2269	99.1421
07SS10-13	07SS10	pre-Mz	182.655	8305	2	13.6517	1.14744	1.65968	1.61044	0.164327	1.13	0.701671	980.779	10.2809	993.253	10.2043	1020.89	23.2305	980.779	10.2809	96.071
07SS10-52	07SS10	pre-Mz	78.4899	2713	2.69356	13.7801	1.59211	1.67553	1.88013	0.167457	1.00004	0.531899	998.086	9.24695	999.286	11.9558	1001.9	32.3259	998.086	9.24695	99.6192
07SS10-8	07SS10	pre-Mz	28.6859	1256	1.2518	13.3889	4.45822	1.73339	4.85808	0.168322	1.93009	0.397294	1002.86	17.9256	1021.01	31.2915	1060.12	89.7613	1002.86	17.9256	94.5989
07SS10-11	07SS10	pre-Mz	352.692	17028	4.69217	13.455	1.75212	1.73674	2.2871	0.16948	1.47	0.642736	1009.24	13.7329	1022.25	14.7383	1050.2	35.3162	1009.24	13.7329	96.1001
07SS10-10	07SS10	pre-Mz	77.5839	4833	5.81929	13.6616	2.49349	1.72332	2.79377	0.170751	1.26002	0.45101	1016.25	11.8466	1017.26	17.9528	1019.42	50.4973	1016.25	11.8466	99.6886
07SS10-65	07SS10	pre-Mz	159.218	9342	2.42645	13.8291	1.93766	1.70683	2.8281	0.171191	2.06	0.728405	1018.67	19.4107	1011.1	18.1092	994.695	39.3852	1018.67	19.4107	102.411
07SS10-76	07SS10	pre-Mz	315.652	12666	3.7052	13.594	1.41827	1.73807	1.92393	0.171362	1.3	0.675702	1019.61	12.2599	1022.75	12.4012	1029.45	28.6752	1019.61	12.2599	99.0444
07SS10-18	07SS10	pre-Mz	318.277	16346	3.56508	13.1823	1.89593	1.7929	3.88415	0.171414	3.39	0.872778	1019.9	31.9784	1042.88	25.3231	1091.35	37.9789	1019.9	31.9784	93.4531
07SS10-31	07SS10	pre-Mz	79.3826	3511	2.33949	13.7228	4.07463	1.72431	4.21536	0.171615	1.08012	0.256235	1021	10.1991	1017.63	27.0973	1010.37	82.6497	1021	10.1991	101.053
07SS10-99	07SS10	pre-Mz	110.413	5484	3.796	13.5072	1.47784	1.75268	3.29947	0.171699	2.95	0.894083	1021.47	27.8673	1028.15	21.3346	1042.39	29.8215	1021.47	27.8673	97.993
07SS10-39	07SS10	pre-Mz	144.282	5492	3.34421	13.3996	1.55644	1.7707	1.85001	0.172082	1.00001	0.540542	1023.57	9.46454	1034.78	12.0055	1058.51	31.3319	1023.57	9.46454	96.6993
07SS10-14	07SS10	pre-Mz	82.8867	5729	2.0899	13.4546	1.80015	1.76413	2.44871	0.172147	1.66	0.677911	1023.93	15.7162	1032.37	15.8699	1050.26	36.2823	1023.93	15.7162	97.4931
07SS10-93	07SS10	pre-Mz	134.636	7842	1.96043	13.6777	3.33321	1.73544	3.47998	0.172156	1	0.287358	1023.98	9.46792	1021.77	22.4213	1017.04	67.5352	1023.98	9.46792	100.682
07SS10-22	07SS10	pre-Mz	206.784	3452	2.67001	13.5328	1.82814	1.75512	2.0838	0.172264	1.00005	0.479918	1024.57	9.47351	1029.05	13.4796	1038.57	36.9137	1024.57	9.47351	98.6524
07SS10-28	07SS10	pre-Mz	371.824	18096	3.52	13.4238	1.02269	1.77144	1.43035	0.172464	1	0.699131	1025.67	9.4824	1035.05	9.28335	1054.88	20.5985	1025.67	9.4824	97.2311
07SS10-98	07SS10	pre-Mz	273.242	14070	4.55443	12.744	1.946	1.86913	3.12098	0.17276	2.44	0.781805	1027.3	23.171	1070.22	20.6476	1158.74	38.5983	1027.3	23.171	88.6572
07SS10-34	07SS10	pre-Mz	95.2245	4157	3.26785	13.3093	2.9894	1.79129	3.15224	0.172909	1.00006	0.317252	1028.12	9.50378	1042.29	20.5432	1072.11	60.0645	1028.12	9.50378	95.8968
07SS10-24	07SS10	pre-Mz	192.408	9811	5.29775	13.017	1.08118	1.84034	1.66029	0.173743	1.26	0.758906	1032.7	12.0233	1059.98	10.9234	1116.57	21.5772	1032.7	12.0233	92.4886
07SS10-63	07SS10	pre-Mz	216.936	3182	3.29364	13.4513	5.00432	1.78815	5.24782	0.174448	1.58002	0.301082	1036.57	15.1292	1041.15	34.187	1050.76	100.91	1036.57	15.1292	98.6498
07SS10-59	07SS10	pre-Mz	89.9616	5090	3.45636	13.47	1.08977	1.78576	1.80588	0.174457	1.44001	0.797396	1036.62	13.7891	1040.28	11.7549	1047.96	21.9727	1036.62	13.7891	98.9184
07SS10-78	07SS10	pre-Mz	151.411	7452	3.79566	13.2489	1.84305	1.81637	3.24434	0.174535	2.67	0.822972	1037.05	25.5769	1051.38	21.2488	1081.24	36.9749	1037.05	25.5769	95.9126
07SS10-26	07SS10	pre-Mz	70.0827	2258	2.4436	13.4985	1.79433	1.78739	5.07761	0.174987	4.75001	0.93548	1039.53	45.6028	1040.87	33.0723	1043.69	36.2027	1039.53	45.6028	99.6016
07SS10-32	07SS10	pre-Mz	66.8317	2935	2.71527	13.2518	2.01964	1.82679	2.25367	0.175575	1.00003	0.443736	1042.76	9.62822	1055.13	14.7893	1080.8	40.5217	1042.76	9.62822	96.4801
07SS10-102	07SS10	pre-Mz	693.179	25144	2.50913	12.9905	1.04409	1.87132	1.44573	0.176308	1	0.691693	1046.78	9.66207	1071	9.56745	1120.63	20.8244	1046.78	9.66207	93.4093
07SS10-50	07SS10	pre-Mz	71.5349	3385	2.27539	13.2908	3.02278	1.84223	3.22709	0.17758	1.13003	0.350168	1053.74	10.9853	1060.66	21.2417	1074.91	60.7102	1053.74	10.9853	98.031
07SS10-45	07SS10	pre-Mz	225.45	9000	2.09985	13.3903	1.0344	1.83197	1.87179	0.177912	1.56	0.83343	1055.56	15.1893	1056.99	12.2952	1059.91	20.8185	1055.56	15.1893	99.5895
07SS10-46	07SS10	pre-Mz	108.615	6968	1.75455	13.1057	2.47959	1.87185	2.67365	0.177922	1.00001	0.374024	1055.61	9.73722	1071.19	17.6965	1103.01	49.5875	1055.61	9.73722	95.7033
07SS10-35	07SS10	pre-Mz	57.5184	2513	2.61071	13.3421	1.13264	1.83973	1.83207	0.178024	1.44001	0.786	1056.17	14.0284	1059.77	12.0523	1067.16	22.7692	1056.17	14.0284	98.9705
07SS10-67	07SS10	pre-Mz	160.044	1637	2.58387	12.9502	1.83031	1.90166	2.15632	0.178611	1.14002	0.528689	1059.38	11.137	1081.67	14.3502	1126.83	36.4737	1059.38	11.137	94.0143
07SS10-40	07SS10	pre-Mz	81.5277	2663	1.46421	13.2766	1.80352	1.86496	2.06221	0.179579	1.00002	0.484926	1064.68	9.81423	1068.75	13.6314	1077.05	36.2063	1064.68	9.81423	98.8516
07SS10-62	07SS10	pre-Mz	84.9253	4643	2.63753	13.1755	1.33662	1.88257	1.6693	0.179894	1.00001	0.599056	1066.4	9.8287	1074.97	11.0702	1092.37	26.7699	1066.4	9.8287	97.6222
07SS10-20	07SS10	pre-Mz	346.469	15903	2.46008	13.1958	1.00426	1.89451	1.91453	0.181313	1.63	0.851384	1074.15	16.1277	1079.16	12.7244	1089.29	20.1231	1074.15	16.1277	98.6094
07SS10-42	07SS10	pre-Mz	60.1565	3485	2.14511	13.3213	1.59658	1.87937	1.88393	0.181575	1.00006	0.530836	1075.57	9.90693	1073.84	12.4862	1070.3	32.0834	1075.57	9.90693	100.493
07SS10-36	07SS10	pre-Mz	171.103	8669	3.01455	13.1643	1.19084	1.90248	1.55503	0.181642	1.00001	0.643078	1075.94	9.90951	1081.96	10.3499	1094.08	23.8456	1075.94	9.90951	98.3421
07SS10-103	07SS10	pre-Mz	16.6813	1167	4.55752	13.0517	3.54596	1.92137	3.9282	0.181876	1.69024	0.430284	1077.22	16.7676	1088.54	26.2389	1111.26	70.8407	1077.22	16.7676	96.9362
07SS10-71	07SS10	pre-Mz	261.105	8537	1.84101	13.3016	1.58181	1.89136	2.76677	0.182464	2.27	0.82045	1080.42	22.5806	1078.06	18.3791	1073.27	31.7725	1080.42	22.5806	100.666
07SS10-75	07SS10	pre-Mz	142.737	9210	0.877823	12.8689	1.4202	1.96122	1.9119	0.183049	1.28001	0.669493	1083.61	12.7672	1102.3	12.858	1139.36	28.2469	1083.61	12.7672	95.1065
07SS10-25	07SS10	pre-Mz	57.4518	2728	2.54638	13.087	2.76469	1.93536	3.05086	0.183696	1.29006	0.422849	1087.14	12.9059	1093.4	20.4273	1105.86	55.2685	1087.14	12.9059	98.3064
07SS10-9	07SS10	pre-Mz	282.263	15823	4.13772	12.845	1.2534	1.9897	2.49732	0.185361	2.16	0.864927	1096.2	21.7742	1112.02	16.8773	1143.07	24.9172	1096.2	21.7742	95.8997
07SS10-101	07SS10	pre-Mz	55.9995	1905	2.46463	12.7898	2.80108	2.00659	3.72796	0.186131	2.46001	0.65988	1100.38	24.8854	1117.74	25.2683	1151.62	55.6215	1100.38	24.8854	95.551
07SS10-4	07SS10	pre-Mz	155.741	5973	0.839407	12.9294	1.92504	1.99037	3.20303	0.186643	2.56	0.799244	1103.17	25.9569	1112.25	21.6504	1130.03	38.3438	1103.17	25.9569	97.6227
07SS10-55	07SS10	pre-Mz	31.2707	1518	2.52284	12.4876	5.60194	2.06897	5.75541	0.187384	1.32024	0.229392	1107.19	13.4312	1138.59	39.4172	1198.92	110.537	1107.19	13.4312	92.3486
07SS10-84	07SS10	pre-Mz	337.942	15588	4.57013	13.0716	2.53484	1.98236	2.72496	0.187935	1	0.366979	1110.18	10.1985	1109.52	18.3933	1108.22	50.6556	1110.18	10.1985	100.177
07SS10-87	07SS10	pre-Mz	135.995	5384	1.22102	13.2812	1.04323	1.95162	2.27348	0.187988	2.02	0.888505	1110.47	20.6058	1099	15.2647	1076.36	20.9446	1110.47	20.6058	103.169
07SS10-72	07SS10	pre-Mz	39.3182	1640	1.34035	12.8603	2.70642	2.01614	3.34752	0.188048	1.97007	0.588517	1110.79	20.1018	1120.96	22.7245	1140.7	53.8271	1110.79	20.1018	97.3777
07SS10-77	07SS10	pre-Mz	238.548	12044	2.88024	13.0439	1.28209	1.98863	2.11333	0.188131	1.68	0.794954	1111.24	17.1484	1111.66	14.2793	1112.46	25.6032	1111.24	17.1484	99.8905
07SS10-38	07SS10	pre-Mz	210.221	5879	4.52399	12.7336	1.05604	2.0372	1.45438	0.188141	1.00001	0.687582	1111.3	10.2079	1128.02	9.90563	1160.35	20.9399	1111.3	10.2079	95.7724
07SS10-105	07SS10	pre-Mz	79.2227	4245	3.54745	12.8731	1.7769	2.03088	2.72048	0.189612	2.06001	0.757223	1119.28	21.1666	1125.91	18.5114	1138.72	35.347	1119.28	21.1666	98.2924
07SS10-85	07SS10	pre-Mz	49.271	4352	2.21328	12.9749	3.67772	2.02142	5.1255	0.190222	3.57003	0.696523	1122.58	36.7813	1122.74	34.8323	1123.03	73.345	1122.58	36.7813	99.9596
07SS10-30	07SS10	pre-Mz	75.4788	3468	3.61754	12.9995	1.34304	2.02328	2.32675	0.190758	1.90001	0.816592	1125.48	19.6215	1123.36	15.8122	1119.25	26.7934	1125.48	19.6215	100.557
07SS10-6	07SS10	pre-Mz	75.3722	3704	2.58657	12.8876	1.70788	2.0421	3.5481	0.190874	3.11001	0.876528	1126.11	32.134	1129.66	24.1886	1136.48	33.9849	1126.11	32.134	99.0874
07SS10-7	07SS10	pre-Mz	107.616	5602	4.41989	12.4578	2.60438	2.11608	2.9198	0.191194	1.32001	0.45209	1127.84	13.658	1154.06	20.1355	1203.63	51.3232	1127.84	13.658	93.7027
07SS10-15	07SS10	pre-Mz	161.523	5459	3.3758	12.6012	1.46262	2.09443	1.77181	0.191415	1.00001	0.564403	1129.04	10.3571	1146.98	12.1773	1181.06	28.9161	1129.04	10.3571	95.5954
07SS10-47	07SS10	pre-Mz	143.629	8301	2.45926	12.7314	1.62382	2.07899	1.90705	0.191967	1.00002	0.524382	1132.02	10.3822	1141.9	13.0756	1160.7	32.197	1132.02	10.3822	97.5292
07SS10-5	07SS10	pre-Mz	221.68	11815	3.09481	12.7137	1.28401	2.08432	2.59059	0.192192	2.25	0.868527	1133.24	23.3825	1143.66	17.7778	1163.46	25.4473	1133.24	23.3825	97.4022
07SS10-83	07SS10	pre-Mz	211.087	10555	5.37265	12.8955	2.55106	2.05831	5.90003	0.192508	5.32	0.901691	1134.95	55.364	1135.06	40.3406	1135.26	50.7746	1134.95	55.364	99.9724
07SS10-56	07SS10	pre-Mz	67.1914	3175	3.52505	12.7487	1.63788	2.09293	1.91905	0.193516	1.00005	0.521119	1140.39	10.4527	1146.49	13.1864	1158.01	32.4885	1140.39	10.4527	98.4787
07SS10-17	07SS10	pre-Mz	342.472	15036	7.60443	12.8449	1.00962	2.07933	1.56059	0.19371	1.19	0.762533	1141.44	12.4486	1142.01	10.7004	1143.09	20.0702	1141.44	12.4486	99.856
07SS10-16	07SS10	pre-Mz	128.054	5283	2.1022	12.7559	1.05376	2.0971	1.45273	0.194013	1.00001	0.688364	1143.08	10.4747	1147.86	9.98833	1156.88	20.9054	1143.08	10.4747	98.8068
07SS10-21	07SS10	pre-Mz	167.346	8150	4.28633	12.2423	3.42013	2.20178	4.24826	0.195494	2.52	0.593185	1151.07	26.5649	1181.61	29.672	1237.94	67.0744	1151.07	26.5649	92.9826
07SS10-80	07SS10	pre-Mz	43.6618	2285	1.94279	12.5787	3.15258	2.17271	3.30745	0.198215	1.00024	0.30242	1165.72	10.6666	1172.35	23.0022	1184.57	62.3046	1165.72	10.6666	98.4088
07SS10-41	07SS10	pre-Mz	299.01	8518	3.1339	12.5727	2.36551	2.18712	2.56821	0.199434	1.00003	0.389387	1172.28	10.719	1176.95	17.897	1185.52	46.7368	1172.28	10.719	98.8828
07SS10-86	07SS10	pre-Mz	45.9268	2598	1.14827	12.5528	2.84275	2.26229	4.92361	0.205962	4.02003	0.816481	1207.27	44.2596	1200.62	34.6823	1188.65	56.145	1207.27	44.2596	101.566
07SS10-3	07SS10	pre-Mz	106.15	4757	2.29133	12.41	1.65563	2.26362	1.9342	0.20374	1.00001	0.517013	1195.38	10.911	1201.03	13.6227	1211.2	32.5877	1211.2	32.5877	98.6936
07SS10-82	07SS10	pre-Mz	135.995	8212	2.15439	12.381	1.07974	2.30941	1.90546	0.207375	1.57001	0.823953	1214.82	17.3835	1215.18	13.5022	1215.8	21.2382	1215.8	21.2382	99.9191
07SS10-12	07SS10	pre-Mz	58.9174	2904	0.753861	12.3091	1.80512	2.3491	2.11911	0.209715	1.11002	0.523816	1227.3	12.405	1227.29	15.0935	1227.25	35.4488	1227.25	35.4488	100.004
07SS10-43	07SS10	pre-Mz	506.86	22301	2.36046	12.2811	1.24281	2.27229	5.69721	0.202395	5.56	0.975917	1188.18	60.3336	1203.73	40.1912	1231.72	24.3881	1231.72	24.3881	96.4647
07SS10-94	07SS10	pre-Mz	178.538	8405	2.51612	12.2356	2.52855	2.23211	2.96061	0.19808	1.54001	0.520166	1165	16.4133	1191.18	20.7635	1239	49.575	1239	49.575	94.0274
07SS10-64	07SS10	pre-Mz	106.523	4514	2.42821	12.1339	1.14536	2.43749	1.87144	0.214507	1.48002	0.790843	1252.79	16.8511	1253.73	13.4751	1255.34	22.4015	1255.34	22.4015	99.7964
07SS10-2	07SS10	pre-Mz	115.876	5712	3.34697	12.0847	1.06967	2.5339	2.54565	0.222089	2.31001	0.907434	1292.9	27.0619	1281.82	18.5358	1263.28	20.8949	1263.28	20.8949	102.345
07SS10-44	07SS10	pre-Mz	26.3942	1344	1.13171	11.9776	3.05369	2.48284	3.51974	0.215683	1.7503	0.497281	1259.03	20.0183	1267.04	25.4828	1280.67	59.5219	1280.67	59.5219	98.3101
07SS10-49	07SS10	pre-Mz	45.0741	2525	4.91167	11.9486	2.06624	2.48703	2.33153	0.215524	1.08014	0.463275	1258.18	12.3461	1268.26	16.8864	1285.38	40.2405	1285.38	40.2405	97.8836
07SS10-61	07SS10	pre-Mz	104.005	5989	2.93805	11.9401	1.14071	2.46758	2.01416	0.213687	1.66001	0.824168	1248.43	18.8409	1262.59	14.5546	1286.76	22.2112	1286.76	22.2112	97.0212
07SS10-60	07SS10	pre-Mz	169.544	11423	1.86548	11.7951	1.5957	2.58804	2.01474	0.221396	1.23001	0.610505	1289.25	14.3728	1297.26	14.7568	1310.52	30.9659	1310.52	30.9659	98.3766
07SS10-66	07SS10	pre-Mz	125.256	8108	2.04381	11.74	1.24142	2.72852	1.64546	0.232323	1.08	0.656354	1346.66	13.1254	1336.26	12.2272	1319.6	24.0608	1319.6	24.0608	102.051
07SS10-51	07SS10	pre-Mz	43.4752	2400	1.91789	11.6841	1.26342	2.64779	1.61132	0.224377	1.00006	0.620648	1304.96	11.8143	1314.03	11.8764	1328.84	24.4531	1328.84	24.4531	98.2036
07SS10-104	07SS10	pre-Mz	41.6366	2949	1.57403	11.6399	2.02007	2.66116	2.25408	0.224655	1.00008	0.443676	1306.43	11.8265	1317.74	16.6376	1336.18	39.0631	1336.18	39.0631	97.7732
07SS10-54	07SS10	pre-Mz	71.7082	3783	3.82229	11.6376	1.88945	2.70762	2.13778	0.228533	1.00004	0.467793	1326.81	11.9922	1330.55	15.8533	1336.56	36.5345	1336.56	36.5345	99.2704
07SS10-70	07SS10	pre-Mz	128.187	8346	1.90679	11.485	1.04711	2.72702	1.81297	0.227153	1.48001	0.816345	1319.56	17.6605	1335.85	13.4701	1362.03	20.1742	1362.03	20.1742	96.8823
07SS10-19	07SS10	pre-Mz	108.308	7988	1.10307	11.4636	1.02001	2.86521	2.72788	0.238218	2.53	0.92746	1377.43	31.3776	1372.81	20.5351	1365.63	19.6423	1365.63	19.6423	100.864
07SS10-58	07SS10	pre-Mz	120.659	9398	1.59102	11.3055	1.02938	2.91744	1.47042	0.239215	1.05001	0.714086	1382.62	13.0663	1386.44	11.1196	1392.32	19.7497	1392.32	19.7497	99.3032
07SS10-81	07SS10	pre-Mz	90.7477	5753	0.891166	11.2554	1.1457	2.98161	2.17604	0.243395	1.85001	0.850172	1404.32	23.3451	1402.94	16.5473	1400.82	21.956	1400.82	21.956	100.25
07SS10-90	07SS10	pre-Mz	106.123	7497	1.49559	11.2272	2.02595	3.11	2.25932	0.253238	1.00002	0.442621	1455.15	13.0263	1435.17	17.3607	1405.64	38.8016	1405.64	38.8016	103.522
07SS10-57	07SS10	pre-Mz	53.6545	3371	1.37741	11.0976	1.44323	3.08052	1.86426	0.247942	1.18006	0.632991	1427.85	15.1139	1427.86	14.2913	1427.84	27.5571	1427.84	27.5571	100.001
07SS10-91	07SS10	pre-Mz	76.4247	5113	2.50417	11.0539	1.09963	2.90487	1.54833	0.232884	1.09002	0.703998	1349.6	13.2731	1383.18	11.6959	1435.37	20.9737	1435.37	20.9737	94.0242
07SS10-96	07SS10	pre-Mz	75.7053	6816	2.47343	11.0396	1.3883	3.17582	2.45934	0.254278	2.03002	0.825432	1460.5	26.5298	1451.3	18.9938	1437.83	26.4694	1437.83	26.4694	101.577
07SS10-29	07SS10	pre-Mz	98.9684	8144	3.15688	10.9549	1.465	3.1365	1.82006	0.249202	1.08001	0.593389	1434.36	13.8888	1441.69	14.0138	1452.51	27.8792	1452.51	27.8792	98.7503
07SS10-97	07SS10	pre-Mz	301.635	30063	2.4641	10.9511	1.74226	2.9876	3.35744	0.23729	2.87	0.854819	1372.59	35.4824	1404.47	25.547	1453.16	33.1514	1453.16	33.1514	94.4556
07SS10-74	07SS10	pre-Mz	133.543	10989	2.17402	10.8843	1.50636	3.30235	3.00485	0.260689	2.6	0.865268	1493.36	34.6586	1481.61	23.4233	1464.8	28.6188	1464.8	28.6188	101.95
07SS10-27	07SS10	pre-Mz	166.027	11029	2.56337	10.8589	1.02671	2.96996	2.2838	0.233902	2.04	0.893249	1354.92	24.929	1399.97	17.3498	1469.24	19.493	1469.24	19.493	92.2193
07SS10-69	07SS10	pre-Mz	74.8792	6438	1.46279	10.6176	1.62958	3.30947	1.91197	0.254849	1.00004	0.52304	1463.44	13.0926	1483.29	14.9099	1511.78	30.7632	1511.78	30.7632	96.8023
07SS10-79	07SS10	pre-Mz	175.153	15069	1.6178	10.3028	1.67216	3.60077	3.25273	0.269061	2.79	0.857742	1536.03	38.1325	1549.7	25.8545	1568.38	31.3345	1568.38	31.3345	97.9378
07SS10-92	07SS10	pre-Mz	150.544	12817	1.23768	9.7084	1.3185	4.21302	1.68551	0.296647	1.05001	0.62296	1674.66	15.4856	1676.56	13.8322	1678.92	24.3554	1678.92	24.3554	99.7462
07SS10-88	07SS10	pre-Mz	64.0737	6117	1.96193	9.57497	2.02712	4.42966	3.31265	0.307615	2.62	0.790909	1728.96	39.7331	1717.9	27.4479	1704.44	37.3251	1704.44	37.3251	101.438
07SS10-68	07SS10	pre-Mz	192.847	15870	3.20872	9.32085	1.00399	4.69148	1.41704	0.31715	1	0.705699	1775.8	15.5221	1765.72	11.8609	1753.81	18.3736	1753.81	18.3736	101.254
07SS10-48	07SS10	pre-Mz	294.267	7339	3.44489	9.21565	1.43167	4.41447	1.84265	0.295055	1.16002	0.629542	1666.74	17.0373	1715.06	15.2555	1774.55	26.1308	1774.55	26.1308	93.9247
07SS10-89	07SS10	pre-Mz	108.015	8326	0.958091	9.07228	1.24719	4.03013	1.5986	0.265176	1.00002	0.625559	1516.27	13.5117	1640.3	13.0057	1803.12	22.6829	1803.12	22.6829	84.0915
07SS10-100	07SS10	pre-Mz	63.4475	5251	0.787418	8.90762	1.48262	5.11738	3.06279	0.330604	2.68002	0.875026	1841.31	42.9262	1839	26.021	1836.36	26.8532	1836.36	26.8532	100.269
07SS10-73	07SS10	pre-Mz	53.0283	3779	1.39101	8.89945	1.06202	5.09393	2.28219	0.328787	2.02003	0.885127	1832.5	32.2209	1835.1	19.3727	1838.02	19.2353	1838.02	19.2353	99.6995
07SS10-37	07SS10	pre-Mz	143.936	15864	3.07877	8.86654	1.05295	5.2371	1.45214	0.336778	1.00001	0.688645	1871.15	16.2408	1858.67	12.3814	1844.73	19.0523	1844.73	19.0523	101.432
07SS10-33	07SS10	pre-Mz	108.748	10600	2.7383	8.60132	1.00375	5.49179	1.41687	0.342593	1	0.705784	1899.13	16.4496	1899.31	12.1711	1899.5	18.0424	1899.5	18.0424	99.9805
07SS10-95	07SS10	pre-Mz	70.4957	10088	0.794515	5.44222	1.04426	13.5313	2.15932	0.53409	1.89002	0.875285	2758.66	42.4183	2717.48	20.4192	2686.99	17.2659	2686.99	17.2659	102.667
07SS10-23	07SS10	pre-Mz	70.0693	5265	1.68556	5.35244	1.59825	13.04	2.34066	0.506206	1.71005	0.730585	2640.41	37.0488	2682.55	22.0773	2714.45	26.3541	2714.45	26.3541	97.2726
081103E-29	081103E	pre-Mz	1170.95	44379	2.52003	5.96228	2.15034	8.97798	2.51276	0.38823	1.3	0.51736	2114.62	23.4365	2335.77	22.961	2535.02	36.0749	2535.02	36.0749	83.4163	exclude	high U
081103E-21	081103E	pre-Mz	165.982	57159	12.6246	8.69988	1.42008	5.39289	1.50553	0.340278	0.5	0.332109	1888.01	8.18328	1883.72	12.8964	1878.99	25.5893	1878.99	25.5893	100.48	exclude	high U/Th
081103E-52	081103E	pre-Mz	143.543	3765	2.43564	8.1893	8.95706	4.3905	9.08683	0.260771	1.53019	0.168397	1493.79	20.4027	1710.55	75.2873	1987.28	159.684	1987.28	159.684	75.1675	exclude	low concordance
081103E-85	081103E	pre-Mz	179.037	12594	1.83895	5.1263	2.80444	10.5493	11.2259	0.392216	10.87	0.968293	2133.1	197.471	2484.26	104.484	2785.39	45.9535	2785.39	45.9535	76.5815	exclude	low concordance
081103E-87	081103E	pre-Mz	63.1486	6972	2.53142	16.1172	2.74605	0.932853	2.85196	0.109044	0.77	0.26999	667.191	4.88046	669.134	13.977	675.687	58.7411	667.191	4.88046	98.7427
081103E-9	081103E	pre-Mz	92.5973	9894	1.59174	15.9096	2.88164	0.968709	3.25795	0.111777	1.52	0.466551	683.058	9.85135	687.798	16.2788	703.355	61.3223	683.058	9.85135	97.1142
081103E-75	081103E	pre-Mz	82.4143	6966	2.20417	15.9956	1.41022	0.968459	1.5834	0.112352	0.720015	0.454728	686.392	4.68811	687.669	7.91012	691.871	30.0726	686.392	4.68811	99.2081
081103E-49	081103E	pre-Mz	276.3	62703	2.06723	11.003	2.48019	3.12417	2.55651	0.249313	0.62	0.242518	1434.93	7.97598	1438.66	19.6666	1444.16	47.2546	1444.16	47.2546	99.3614
081103E-36	081103E	pre-Mz	209.729	48711	2.35715	9.66642	1.15049	4.26449	1.35194	0.298973	0.71	0.525173	1686.21	10.5344	1686.54	11.1202	1686.92	21.2297	1686.92	21.2297	99.958
081103E-43	081103E	pre-Mz	162.319	38331	1.8002	9.66108	1.2705	4.20384	1.64823	0.294558	1.05	0.637046	1664.27	15.4013	1674.77	13.5206	1687.94	23.4416	1687.94	23.4416	98.5975
081103E-41	081103E	pre-Mz	277.611	83577	3.4662	9.63761	2.22003	4.29449	2.61928	0.300179	1.39	0.530679	1692.2	20.6877	1692.31	21.5757	1692.43	40.9408	1692.43	40.9408	99.9863
081103E-83	081103E	pre-Mz	186.371	41025	2.42975	9.53411	2.55009	4.29135	2.87147	0.296738	1.32	0.459695	1675.11	19.4722	1691.7	23.6505	1712.31	46.9119	1712.31	46.9119	97.8277
081103E-73	081103E	pre-Mz	507.367	111342	5.11781	9.52216	1.87004	4.43077	2.13978	0.305995	1.04	0.486032	1720.97	15.7081	1718.11	17.728	1714.62	34.388	1714.62	34.388	100.37
081103E-12	081103E	pre-Mz	240.346	74490	4.40429	9.51124	1.39019	4.4079	1.55648	0.304066	0.7	0.449733	1711.44	10.5217	1713.83	12.8825	1716.73	25.5554	1716.73	25.5554	99.692
081103E-16	081103E	pre-Mz	137.679	46269	1.81877	9.48139	1.06071	4.47785	1.17265	0.307922	0.500001	0.426386	1730.47	7.58836	1726.88	9.73354	1722.5	19.4833	1722.5	19.4833	100.463
081103E-32	081103E	pre-Mz	125.197	32817	3.38215	9.46034	1.78118	4.32594	2.1646	0.296815	1.23	0.568235	1675.49	18.1481	1698.32	17.854	1726.59	32.7044	1726.59	32.7044	97.0409
081103E-42	081103E	pre-Mz	254.562	84183	3.44379	9.45635	1.73024	4.48665	1.86275	0.307712	0.69	0.37042	1729.44	10.4665	1728.51	15.468	1727.36	31.7658	1727.36	31.7658	100.12
081103E-5	081103E	pre-Mz	341.476	92607	3.20071	9.45134	1.85015	4.53552	2.13229	0.310899	1.06	0.497119	1745.13	16.206	1737.51	17.7414	1728.33	33.9637	1728.33	33.9637	100.972
081103E-4	081103E	pre-Mz	105.049	35814	2.83128	9.44225	1.5906	4.55407	2.09275	0.31187	1.36	0.649863	1749.9	20.8421	1740.91	17.4252	1730.1	29.1914	1730.1	29.1914	101.145
081103E-34	081103E	pre-Mz	177.778	60879	3.82873	9.41967	1.37071	4.48196	1.92388	0.306198	1.35	0.701705	1721.97	20.4008	1727.64	15.9726	1734.49	25.1428	1734.49	25.1428	99.2781
081103E-38	081103E	pre-Mz	212.985	60207	4.55599	9.41789	1.21014	4.52167	1.32927	0.308852	0.55	0.413762	1735.06	8.36645	1734.96	11.0532	1734.84	22.1962	1734.84	22.1962	100.013
081103E-47	081103E	pre-Mz	110.928	32541	2.09671	9.40138	1.3641	4.5254	1.67382	0.308566	0.970003	0.579513	1733.64	14.745	1735.65	13.9207	1738.06	25.0106	1738.06	25.0106	99.7462
081103E-77	081103E	pre-Mz	164.128	45207	2.65004	9.38867	1.19045	4.59786	1.34222	0.313082	0.620001	0.46192	1755.86	9.52966	1748.88	11.1945	1740.54	21.8194	1740.54	21.8194	100.88
081103E-84	081103E	pre-Mz	302.236	52059	3.025	9.38854	1.51011	4.55874	1.77877	0.310414	0.94	0.528454	1742.75	14.3542	1741.76	14.8132	1740.56	27.6794	1740.56	27.6794	100.126
081103E-37	081103E	pre-Mz	258.074	65796	4.23264	9.38062	1.53007	4.54766	1.60969	0.309398	0.5	0.310618	1737.75	7.61614	1739.73	13.3991	1742.1	28.0399	1742.1	28.0399	99.7499
081103E-55	081103E	pre-Mz	132.84	34614	2.94372	9.35294	2.08025	4.56209	2.62439	0.309464	1.6	0.609665	1738.07	24.3757	1742.37	21.8601	1747.52	38.0974	1747.52	38.0974	99.4593
081103E-78	081103E	pre-Mz	195.868	19260	3.30418	9.33788	1.57088	4.61116	1.67803	0.312289	0.590001	0.351604	1751.96	9.05105	1751.29	14.0028	1750.47	28.7579	1750.47	28.7579	100.085
081103E-48	081103E	pre-Mz	269.878	76302	2.35858	9.33506	1.34023	4.61201	1.43046	0.312252	0.5	0.349538	1751.78	7.66968	1751.44	11.9371	1751.02	24.533	1751.02	24.533	100.043
081103E-30	081103E	pre-Mz	176.557	35280	4.39003	9.29977	0.693302	4.54535	0.950352	0.306576	0.650002	0.683959	1723.84	9.83188	1739.31	7.90973	1757.95	12.6805	1757.95	12.6805	98.0593
081103E-65	081103E	pre-Mz	111.66	47319	2.25686	9.29845	0.552181	4.59152	0.744919	0.309646	0.500001	0.671216	1738.96	7.62081	1747.73	6.21114	1758.21	10.099	1758.21	10.099	98.9052
081103E-18	081103E	pre-Mz	278.478	84030	2.68872	9.29618	1.24006	4.67784	2.22716	0.315391	1.85	0.830654	1767.18	28.5948	1763.29	18.6334	1758.66	22.6758	1758.66	22.6758	100.485
081103E-20	081103E	pre-Mz	109.7	26967	3.61024	9.29594	1.56018	4.69371	1.65098	0.316452	0.54	0.327078	1772.38	8.36788	1766.12	13.8204	1758.71	28.5308	1758.71	28.5308	100.777
081103E-69	081103E	pre-Mz	175.215	41352	2.58576	9.26523	1.95072	4.6651	2.29552	0.313484	1.21	0.527115	1757.83	18.6164	1761	19.1962	1764.76	35.648	1764.76	35.648	99.6075
081103E-70	081103E	pre-Mz	277.619	18582	2.26063	9.26118	7.02279	4.19478	7.07771	0.281757	0.880011	0.124336	1600.2	12.4703	1673	58.0949	1765.55	128.474	1765.55	128.474	90.6347
081103E-40	081103E	pre-Mz	111.237	41538	4.59396	9.25812	1.82011	4.76462	1.88754	0.319927	0.5	0.264896	1789.37	7.81248	1778.69	15.8423	1766.16	33.2548	1766.16	33.2548	101.314
081103E-8	081103E	pre-Mz	290.01	82983	1.84321	9.24549	0.940142	4.70223	1.0892	0.315306	0.55	0.504956	1766.77	8.49938	1767.64	9.12032	1768.65	17.1708	1768.65	17.1708	99.8935
081103E-13	081103E	pre-Mz	124.579	43419	2.49554	9.23264	1.75056	4.76409	1.99172	0.31901	0.950001	0.476975	1784.89	14.8115	1778.59	16.7165	1771.19	31.9637	1771.19	31.9637	100.774
081103E-7	081103E	pre-Mz	532.723	11796	5.64405	9.19295	3.4544	4.42024	3.54137	0.294713	0.780011	0.220257	1665.04	11.4458	1716.14	29.3325	1779.05	63.0293	1779.05	63.0293	93.5913
081103E-24	081103E	pre-Mz	152.241	48240	4.18578	9.18433	2.67033	4.63957	3.09767	0.309047	1.57	0.506833	1736.01	23.894	1756.42	25.8816	1780.76	48.7054	1780.76	48.7054	97.4871
081103E-11	081103E	pre-Mz	236.449	63969	4.19389	9.18184	1.19007	4.80024	2.10805	0.319663	1.74	0.825407	1788.08	27.1706	1784.94	17.7163	1781.26	21.7024	1781.26	21.7024	100.383
081103E-17	081103E	pre-Mz	133.45	44280	1.31563	9.17884	2.25028	4.9081	2.32135	0.326738	0.570001	0.245547	1822.55	9.04916	1803.65	19.5835	1781.85	41.0354	1781.85	41.0354	102.284
081103E-44	081103E	pre-Mz	154.683	9090	2.05353	9.11273	2.19528	4.70043	2.31665	0.31066	0.740028	0.319438	1743.95	11.3074	1767.32	19.3988	1795.02	39.9689	1795.02	39.9689	97.1549
081103E-79	081103E	pre-Mz	324.411	67224	4.37938	8.99913	1.06011	4.98277	1.2084	0.325215	0.58	0.479975	1815.15	9.17552	1816.4	10.2193	1817.83	19.2453	1817.83	19.2453	99.8527
081103E-22	081103E	pre-Mz	355.993	9543	5.25919	8.93213	3.45945	4.51581	3.8769	0.292543	1.75003	0.4514	1654.22	25.5336	1733.89	32.2394	1831.38	62.7156	1831.38	62.7156	90.3266
081103E-57	081103E	pre-Mz	125.008	38271	3.43839	8.79112	1.74056	5.23074	2.10847	0.333508	1.19	0.564389	1855.36	19.1857	1857.64	17.9749	1860.17	31.437	1860.17	31.437	99.7415
081103E-6	081103E	pre-Mz	109.67	26985	2.17129	8.73459	1.59064	5.32217	1.99856	0.337155	1.21	0.605436	1872.97	19.6677	1872.43	17.0848	1871.82	28.6883	1871.82	28.6883	100.062
081103E-23	081103E	pre-Mz	110.597	23205	2.57705	8.72165	2.37299	5.08719	3.08415	0.321792	1.97	0.638751	1798.48	30.9172	1833.97	26.1772	1874.49	42.79	1874.49	42.79	95.9449
081103E-72	081103E	pre-Mz	171.914	72744	1.80111	8.65656	0.900064	5.41976	1.7322	0.340271	1.48	0.854405	1887.97	24.2222	1887.98	14.8498	1887.98	16.2013	1887.98	16.2013	99.9994
081103E-64	081103E	pre-Mz	24.2102	8802	2.87841	8.64011	2.32889	5.46535	2.42061	0.34248	0.660027	0.27267	1898.59	10.8545	1895.17	20.7798	1891.4	41.9074	1891.4	41.9074	100.38
081103E-19	081103E	pre-Mz	258.654	2535	8.33133	7.72589	3.87104	5.53801	4.28618	0.310313	1.84021	0.429335	1742.25	28.094	1906.52	36.8807	2090.29	68.0843	2090.29	68.0843	83.3495
081103E-80	081103E	pre-Mz	199.418	47451	2.68527	6.26491	2.85006	9.56786	3.63116	0.434739	2.25	0.619636	2327.04	43.9504	2394.09	33.3934	2451.62	48.22	2451.62	48.22	94.9187
081103E-81	081103E	pre-Mz	173.195	96033	2.884	6.21842	1.44006	10.2225	1.67731	0.461035	0.86	0.512726	2444.13	17.4941	2455.11	15.5147	2464.21	24.3293	2464.21	24.3293	99.185
081103E-58	081103E	pre-Mz	158.218	70875	2.13215	6.17497	1.13009	10.4328	1.38459	0.467235	0.8	0.577788	2471.42	16.4227	2473.97	12.8299	2476.04	19.0687	2476.04	19.0687	99.8133
081103E-27	081103E	pre-Mz	292.4	130128	3.32437	6.12252	2.21001	10.5727	2.40951	0.46948	0.96	0.398422	2481.28	19.7717	2486.32	22.3553	2490.43	37.2408	2490.43	37.2408	99.6326
081103E-14	081103E	pre-Mz	136.571	67869	2.67576	6.1223	0.950024	10.5558	1.16252	0.468711	0.67	0.576336	2477.9	13.7836	2484.83	10.7829	2490.49	16.0094	2490.49	16.0094	99.4947
081103E-66	081103E	pre-Mz	209.933	80496	1.82964	6.11837	1.95002	10.6551	2.01311	0.472816	0.5	0.248373	2495.9	10.3474	2493.52	18.689	2491.57	32.8544	2491.57	32.8544	100.174
081103E-74	081103E	pre-Mz	146.226	16011	2.76614	6.11138	1.85266	10.3388	2.6681	0.458258	1.92001	0.719615	2431.86	38.8958	2465.59	24.7071	2493.5	31.2075	2493.5	31.2075	97.5281
081103E-53	081103E	pre-Mz	201.174	61980	1.86556	6.08496	0.830118	10.6	0.990301	0.467801	0.540001	0.545289	2473.91	11.0945	2488.71	9.18876	2500.79	13.9714	2500.79	13.9714	98.925
081103E-59	081103E	pre-Mz	105.411	48813	3.21967	6.0654	1.05005	10.7231	1.50632	0.471714	1.08	0.716977	2491.07	22.3151	2499.43	13.9912	2506.21	17.6646	2506.21	17.6646	99.3959
081103E-60	081103E	pre-Mz	264.993	9474	1.96994	6.04893	2.56613	9.01682	2.64235	0.395577	0.630066	0.238449	2148.64	11.5128	2339.71	24.1561	2510.78	43.157	2510.78	43.157	85.5766
081103E-2	081103E	pre-Mz	124.172	51525	3.00596	6.04752	0.800022	10.756	0.943417	0.471767	0.5	0.529989	2491.31	10.3318	2502.28	8.76467	2511.17	13.451	2511.17	13.451	99.2089
081103E-68	081103E	pre-Mz	168.055	9978	1.5508	6.03249	0.780326	10.4756	0.926805	0.458327	0.500058	0.53955	2432.17	10.1312	2477.76	8.59077	2515.36	13.1143	2515.36	13.1143	96.6928
081103E-67	081103E	pre-Mz	124.835	62955	2.53937	6.01926	1.35013	10.9625	1.52543	0.478574	0.710001	0.465442	2521.05	14.8144	2519.95	14.1951	2519.05	22.685	2519.05	22.685	100.08
081103E-46	081103E	pre-Mz	465.142	90333	1.70625	5.94063	1.26009	11.116	1.64022	0.478939	1.05	0.640158	2522.64	21.92	2532.9	15.2811	2541.12	21.1257	2541.12	21.1257	99.2731
081103E-28	081103E	pre-Mz	509.101	206241	1.43357	5.9334	1.71	11.0941	2.00143	0.477412	1.04	0.519629	2515.99	21.6643	2531.06	18.6439	2543.16	28.665	2543.16	28.665	98.9315
081103E-1	081103E	pre-Mz	213.558	78519	1.12318	5.93137	2.14003	11.2713	2.20469	0.484874	0.530001	0.240397	2548.46	11.1567	2545.84	20.5646	2543.73	35.8712	2543.73	35.8712	100.186
081103E-33	081103E	pre-Mz	122.031	51306	0.943828	5.89109	1.46005	11.4751	1.85239	0.490288	1.14	0.615421	2571.92	24.1772	2562.56	17.3028	2555.14	24.4452	2555.14	24.4452	100.657
081103E-10	081103E	pre-Mz	195.988	77073	1.16458	5.87814	1.42003	11.5375	1.55759	0.49187	0.64	0.410891	2578.76	13.6025	2567.62	14.5551	2558.83	23.7665	2558.83	23.7665	100.779
081103E-76	081103E	pre-Mz	145.028	60408	0.751689	5.79768	1.24004	11.6488	1.40947	0.489815	0.67	0.475356	2569.88	14.2002	2576.6	13.1808	2581.87	20.7068	2581.87	20.7068	99.5355
081103E-50	081103E	pre-Mz	216.716	86802	0.558739	5.76681	1.41002	11.8227	1.64641	0.494482	0.85	0.516275	2590.04	18.13	2590.46	15.4148	2590.78	23.5256	2590.78	23.5256	99.9714
081103E-71	081103E	pre-Mz	163.133	66003	2.20221	5.63876	1.21006	12.2458	1.51405	0.500804	0.91	0.601037	2617.25	19.5751	2623.42	14.2137	2628.18	20.1159	2628.18	20.1159	99.5844
081103E-26	081103E	pre-Mz	245.291	73362	1.82913	5.4278	4.13007	13.0271	4.23349	0.512824	0.930002	0.219677	2668.68	20.3228	2681.61	39.9422	2691.37	68.2788	2691.37	68.2788	99.1568
081103E-82	081103E	pre-Mz	147.47	47109	2.29236	5.41958	1.57018	13.1994	1.77605	0.518822	0.830002	0.46733	2694.18	18.2772	2694.01	16.7652	2693.87	25.9422	2693.87	25.9422	100.012
081103E-31	081103E	pre-Mz	99.8408	42702	5.01152	5.37012	2.21018	13.4674	2.2825	0.524527	0.570004	0.249728	2718.35	12.6424	2713	21.5774	2709.01	36.4648	2709.01	36.4648	100.345
081103E-86	081103E	pre-Mz	265.559	90555	1.99179	5.34669	2.05005	12.8627	3.84255	0.498789	3.25	0.845792	2608.59	69.726	2669.65	36.2175	2716.22	33.7993	2716.22	33.7993	96.0375
081103E-56	081103E	pre-Mz	94.2933	52557	1.67889	5.31825	1.48006	13.5747	1.56546	0.523599	0.510001	0.325783	2714.43	11.2984	2720.51	14.8059	2725.01	24.3819	2725.01	24.3819	99.6115
081103E-39	081103E	pre-Mz	158.196	80478	1.7297	5.24949	2.06	13.9867	2.13216	0.532515	0.55	0.257954	2752.04	12.3199	2748.81	20.2077	2746.42	33.8716	2746.42	33.8716	100.205
081103E-15	081103E	pre-Mz	104.348	52503	1.32859	5.24846	2.18005	13.8341	2.23665	0.526601	0.500001	0.223549	2727.12	11.1185	2738.42	21.1827	2746.74	35.8451	2746.74	35.8451	99.2854
081103E-3	081103E	pre-Mz	213.867	100077	2.17396	5.16319	1.48001	14.4436	1.727	0.54087	0.89	0.515344	2787.09	20.1389	2779.3	16.4017	2773.64	24.2721	2773.64	24.2721	100.485
081103E-62	081103E	pre-Mz	145.382	59049	1.27327	5.08203	1.62008	14.7955	2.65229	0.545337	2.1	0.791769	2805.75	47.7735	2802.18	25.2311	2799.59	26.507	2799.59	26.507	100.22
081103E-35	081103E	pre-Mz	97.2781	53700	1.92432	4.99476	1.37007	15.1756	1.55715	0.549743	0.740001	0.475229	2824.1	16.922	2826.32	14.8346	2827.9	22.3583	2827.9	22.3583	99.8658
081103E-61	081103E	pre-Mz	407.504	4917	3.17219	4.89189	1.37355	12.7917	3.60217	0.453842	3.33001	0.924446	2412.31	67.0141	2664.43	33.9364	2861.8	22.347	2861.8	22.347	84.2933
081103E-63	081103E	pre-Mz	213.106	24858	3.03191	4.65645	0.970391	16.6272	1.87127	0.561531	1.6	0.855034	2872.95	37.0908	2913.58	17.9245	2941.77	15.676	2941.77	15.676	97.6608
081103E-51	081103E	pre-Mz	35.7651	20109	0.291847	4.6148	1.20023	17.4117	1.37948	0.582765	0.680005	0.492944	2960.02	16.1402	2957.8	13.2469	2956.28	19.3697	2956.28	19.3697	100.127
081103E-45	081103E	pre-Mz	144.184	8451	1.01798	4.09367	3.19195	16.9651	3.58864	0.503695	1.64004	0.45701	2629.66	35.4149	2932.86	34.4233	3148.06	50.6975	3148.06	50.6975	83.5327
081103E-25	081103E	pre-Mz	42.1116	12270	2.73945	3.75206	1.55021	23.9575	1.90083	0.651942	1.10001	0.578698	3235.79	27.9853	3266.66	18.5294	3285.66	24.349	3285.66	24.349	98.4822
081103E-54	081103E	pre-Mz	78.2988	53928	1.89942	3.49532	1.65001	27.4929	1.7241	0.696956	0.500001	0.290006	3409.1	13.2381	3401.18	16.8934	3396.52	25.699	3396.52	25.699	100.37
08BC60-39	08BC60	pre-Mz	733.878	174670	16.2636	9.12384	0.243935	4.29137	3.49903	0.28397	3.49051	0.997567	1611.32	49.7661	1691.71	28.8218	1792.8	4.44236	1792.8	49.7661	89.8773	exclude	high U/Th
08BC60-68	08BC60	pre-Mz	689.199	463029	13.9076	9.06237	0.376358	4.2412	4.33231	0.278759	4.31593	0.996219	1585.11	60.6521	1682.03	35.6111	1805.11	6.84356	1805.11	60.6521	87.8125	exclude	high U/Th
08BC60-96	08BC60	pre-Mz	715.52	26120.8	4.30337	9.35468	0.46159	3.29902	3.11434	0.223827	3.07994	0.988955	1302.07	36.3126	1480.82	24.2713	1747.18	8.45201	1747.18	36.3126	74.5239	exclude	low concordance
08BC60-35	08BC60	pre-Mz	476.842	141295	9.09403	8.76788	0.657754	3.926	6.0238	0.249657	5.98778	0.994021	1436.71	77.1182	1619.06	48.7854	1864.95	11.8719	1864.95	77.1182	77.0372	exclude	low concordance
08BC60-54	08BC60	pre-Mz	75.8663	16003.6	2.34489	13.4453	9.86007	1.85909	10.1821	0.181289	2.54042	0.249499	1074.01	25.1328	1066.66	67.3248	1051.68	199.163	1051.68	25.1328	102.123
08BC60-43	08BC60	pre-Mz	76.7403	13797.1	2.37243	13.1489	7.12692	1.80811	9.48645	0.17243	6.26097	0.659991	1025.49	59.3607	1048.39	62.0991	1096.42	142.841	1096.42	59.3607	93.5308
08BC60-45	08BC60	pre-Mz	59.0584	10864	2.87503	11.5016	8.13457	2.79326	9.32432	0.233007	4.55762	0.488788	1350.24	55.5227	1353.74	69.8281	1359.24	157.017	1359.24	55.5227	99.3378
08BC60-72	08BC60	pre-Mz	208.89	37876.6	2.63875	11.2438	2.20207	2.72873	3.38304	0.222522	2.56823	0.759151	1295.19	30.1351	1336.31	25.1435	1402.81	42.1915	1402.81	30.1351	92.3283
08BC60-44	08BC60	pre-Mz	207.448	39717.9	3.05266	11.1394	1.81682	2.87784	2.17584	0.232502	1.19727	0.550255	1347.6	14.5596	1376.13	16.3973	1420.66	34.7234	1420.66	14.5596	94.8572
08BC60-33	08BC60	pre-Mz	223.502	34997.9	2.18774	11.1339	3.30479	2.99086	5.84324	0.241514	4.8189	0.824697	1394.56	60.4324	1405.3	44.4929	1421.6	63.1668	1421.6	60.4324	98.0984
08BC60-19	08BC60	pre-Mz	98.011	23730.3	3.03939	11.1187	3.95562	2.92299	4.45288	0.235713	2.0448	0.459208	1364.37	25.1441	1387.88	33.7008	1424.2	75.5881	1424.2	25.1441	95.799
08BC60-108	08BC60	pre-Mz	73.6096	13845	1.69847	11.1038	4.90807	2.89746	7.42277	0.23334	5.56852	0.750194	1351.98	67.9174	1381.25	56.0884	1426.76	93.7744	1426.76	67.9174	94.7589
08BC60-2	08BC60	pre-Mz	261.121	45856.4	2.75092	11.0421	2.46894	2.87811	3.58964	0.230492	2.60574	0.725906	1337.08	31.4652	1376.2	27.0565	1437.4	47.0831	1437.4	31.4652	93.0205
08BC60-64	08BC60	pre-Mz	174.066	31739.7	2.44286	10.9978	2.02549	2.92734	3.45758	0.233495	2.80218	0.810446	1352.79	34.1947	1389.01	26.1742	1445.07	38.5847	1445.07	34.1947	93.6143
08BC60-90	08BC60	pre-Mz	88.0141	15967.1	2.83369	10.9884	4.10315	2.998	5.04043	0.238927	2.92748	0.5808	1381.11	36.3945	1407.11	38.3967	1446.69	78.1687	1446.69	36.3945	95.4673
08BC60-98	08BC60	pre-Mz	139.551	30270	2.17898	10.9808	2.34706	2.91827	4.98531	0.232411	4.39826	0.882243	1347.12	53.47	1386.66	37.7184	1448.01	44.6941	1448.01	53.47	93.0325
08BC60-25	08BC60	pre-Mz	58.9102	15001	1.88362	10.9441	4.56924	2.96128	5.0869	0.23505	2.23577	0.439514	1360.91	27.4298	1397.74	38.6311	1454.37	86.9669	1454.37	27.4298	93.5737
08BC60-79	08BC60	pre-Mz	209.791	37684.2	3.28074	10.9144	2.17487	3.06498	3.78318	0.242619	3.09555	0.81824	1400.3	38.9627	1423.98	28.9717	1459.55	41.35	1459.55	38.9627	95.9407
08BC60-78	08BC60	pre-Mz	102.963	18549.8	2.51459	10.6716	3.53397	3.06761	4.3587	0.237425	2.55134	0.585344	1373.3	31.5572	1424.64	33.3891	1502.2	66.8191	1502.2	31.5572	91.4193
08BC60-52	08BC60	pre-Mz	82.6804	22887	1.9362	9.98082	2.85024	3.7248	3.96699	0.26963	2.75919	0.695537	1538.92	37.7742	1576.71	31.7652	1627.64	53.005	1627.64	37.7742	94.5497
08BC60-105	08BC60	pre-Mz	83.1385	32580.3	0.987598	9.70718	2.44648	3.85305	4.56666	0.271267	3.85604	0.844391	1547.23	53.0432	1603.91	36.8306	1679.15	45.1945	1679.15	53.0432	92.1434
08BC60-36	08BC60	pre-Mz	78.7766	13175.9	2.29307	9.5739	2.82185	3.9518	3.87705	0.274399	2.65869	0.685752	1563.09	36.9036	1624.36	31.4269	1704.64	51.9621	1704.64	36.9036	91.6961
08BC60-56	08BC60	pre-Mz	78.7809	30800.8	2.44182	9.55144	2.62692	4.29193	3.43809	0.297317	2.21805	0.645139	1677.99	32.7692	1691.81	28.3203	1708.97	48.3447	1708.97	32.7692	98.1873
08BC60-100	08BC60	pre-Mz	245.1	42166.6	3.15258	9.53532	1.16524	4.298	2.33971	0.297235	2.02891	0.867162	1677.58	29.9685	1692.98	19.2752	1712.08	21.4336	1712.08	29.9685	97.9853
08BC60-73	08BC60	pre-Mz	147.306	32445.8	3.13591	9.48378	1.94946	4.25214	2.66352	0.292474	1.81493	0.681401	1653.88	26.4756	1684.15	21.899	1722.04	35.8155	1722.04	26.4756	96.0421
08BC60-97	08BC60	pre-Mz	189.168	87513.4	2.54264	9.48191	0.946274	4.10158	2.68831	0.282063	2.51626	0.936002	1601.74	35.6874	1654.62	21.9494	1722.4	17.3846	1722.4	35.6874	92.9947
08BC60-76	08BC60	pre-Mz	227.846	158461	3.52094	9.46417	1.17839	3.95823	2.3084	0.271695	1.98497	0.859891	1549.4	27.3384	1625.68	18.7139	1725.84	21.6381	1725.84	27.3384	89.7766
08BC60-80	08BC60	pre-Mz	134.949	27500	4.17489	9.43114	1.52934	4.1994	3.04572	0.287243	2.63392	0.864794	1627.74	37.8892	1673.9	24.9828	1732.26	28.061	1732.26	37.8892	93.9663
08BC60-66	08BC60	pre-Mz	186.08	36345	7.17544	9.42977	1.96205	4.3232	4.01993	0.295668	3.50859	0.872798	1669.79	51.6144	1697.8	33.1616	1732.53	35.9996	1732.53	51.6144	96.3791
08BC60-104	08BC60	pre-Mz	165.415	32086.1	1.41827	9.41175	1.00713	4.08084	3.60897	0.27856	3.4656	0.960273	1584.11	48.6746	1650.48	29.4408	1736.03	18.4694	1736.03	48.6746	91.2486
08BC60-112	08BC60	pre-Mz	195.024	56478.2	3.01606	9.40032	1.79105	4.20895	2.49024	0.286956	1.73015	0.694775	1626.3	24.8689	1675.77	20.434	1738.26	32.8393	1738.26	24.8689	93.5589
08BC60-27	08BC60	pre-Mz	790.286	228418	3.58902	9.34193	0.553037	3.85862	2.67537	0.261437	2.61758	0.978401	1497.19	34.9723	1605.07	21.5773	1749.68	10.1237	1749.68	34.9723	85.5696
08BC60-29	08BC60	pre-Mz	199.097	60746.9	2.7706	9.28855	1.34594	4.45335	3.07483	0.300008	2.76461	0.899108	1691.35	41.1287	1722.32	25.5015	1760.16	24.6077	1760.16	41.1287	96.0907
08BC60-58	08BC60	pre-Mz	103.349	34307.3	1.46152	9.26531	1.70363	4.77441	4.39559	0.320833	4.05202	0.921837	1793.79	63.4505	1780.41	36.9191	1764.74	31.1316	1764.74	63.4505	101.646
08BC60-6	08BC60	pre-Mz	219.517	71550.4	3.15834	9.24929	1.44366	4.47504	2.48916	0.300196	2.02774	0.814631	1692.28	30.1808	1726.35	20.661	1767.9	26.3695	1767.9	30.1808	95.7225
08BC60-57	08BC60	pre-Mz	168.121	58424.7	1.42582	9.24733	0.86058	4.6824	4.25442	0.314039	4.16647	0.979328	1760.55	64.1913	1764.1	35.6111	1768.29	15.7181	1768.29	64.1913	99.5624
08BC60-83	08BC60	pre-Mz	538.355	76863.2	4.67746	9.24636	0.740096	4.16374	2.50852	0.279224	2.39686	0.955487	1587.45	33.7265	1666.91	20.5412	1768.48	13.5169	1768.48	33.7265	89.7637
08BC60-26	08BC60	pre-Mz	318.756	75004.1	2.71465	9.24029	0.822729	4.6041	2.26422	0.308552	2.10946	0.931649	1733.58	32.0649	1750.01	18.8902	1769.68	15.0241	1769.68	32.0649	97.9601
08BC60-8	08BC60	pre-Mz	148.803	85338	2.29706	9.23896	2.08566	4.55145	3.3442	0.30498	2.61414	0.781693	1715.96	39.3841	1740.43	27.8468	1769.94	38.0902	1769.94	39.3841	96.95
08BC60-17	08BC60	pre-Mz	275.776	57680.7	4.48733	9.2259	1.47025	4.50615	3.41668	0.301518	3.08416	0.902678	1698.83	46.0602	1732.11	28.3991	1772.52	26.8418	1772.52	46.0602	95.8426
08BC60-38	08BC60	pre-Mz	292.987	97282.4	3.7276	9.21795	1.08413	4.27511	1.68082	0.285812	1.28445	0.764183	1620.57	18.4052	1688.58	13.8323	1774.1	19.7876	1774.1	18.4052	91.3459
08BC60-107	08BC60	pre-Mz	295.293	76126	4.65703	9.21661	0.942199	4.46821	3.6294	0.298678	3.50497	0.965716	1684.75	51.9653	1725.09	30.1218	1774.36	17.1962	1774.36	51.9653	94.9496
08BC60-53	08BC60	pre-Mz	307.425	91849.5	2.66327	9.17992	1.45188	4.2397	4.0925	0.282275	3.8263	0.934955	1602.81	54.2999	1681.74	33.6361	1781.64	26.4764	1781.64	54.2999	89.9627
08BC60-91	08BC60	pre-Mz	338.873	154221	2.79602	9.17624	1.22917	4.61948	2.96704	0.307438	2.70046	0.910152	1728.08	40.9353	1752.79	24.7706	1782.37	22.4125	1782.37	40.9353	96.9544
08BC60-63	08BC60	pre-Mz	161.179	47688.6	2.01824	9.17311	1.38178	5.00046	2.75467	0.332679	2.38304	0.865091	1851.35	38.349	1819.4	23.3131	1782.99	25.1937	1782.99	38.349	103.834
08BC60-113	08BC60	pre-Mz	710.369	166191	9.71834	9.16392	0.603617	3.90633	5.90329	0.259626	5.87235	0.994759	1487.93	78.0294	1614.99	47.7591	1784.82	11.0017	1784.82	78.0294	83.3659
08BC60-18	08BC60	pre-Mz	307.787	71487.6	3.58053	9.16153	1.27571	4.54986	2.40416	0.302319	2.03778	0.847606	1702.8	30.4949	1740.14	20.0155	1785.29	23.2528	1785.29	30.4949	95.379
08BC60-12	08BC60	pre-Mz	597.943	260789	8.98127	9.15951	0.768265	4.53674	2.52042	0.301381	2.40048	0.952411	1698.15	35.8369	1737.73	20.9727	1785.69	14.0017	1785.69	35.8369	95.0975
08BC60-48	08BC60	pre-Mz	345.214	50833.3	3.8343	9.15747	0.838457	4.58952	3.47159	0.304819	3.36882	0.970396	1715.16	50.7336	1747.37	28.9513	1786.1	15.2803	1786.1	50.7336	96.0281
08BC60-55	08BC60	pre-Mz	379.667	107792	4.46544	9.15697	0.791756	4.86168	4.04012	0.322877	3.96178	0.980609	1803.76	62.3361	1795.64	34.037	1786.2	14.4289	1786.2	62.3361	100.983
08BC60-59	08BC60	pre-Mz	211.056	106526	2.01551	9.15408	0.936217	4.65802	2.33055	0.309254	2.13423	0.915765	1737.03	32.4979	1759.73	19.484	1786.78	17.0608	1786.78	32.4979	97.216
08BC60-51	08BC60	pre-Mz	396.774	279777	7.84725	9.15268	0.730752	4.38353	1.93076	0.290985	1.78713	0.92561	1646.45	25.9673	1709.24	15.9644	1787.06	13.3156	1787.06	25.9673	92.132
08BC60-5	08BC60	pre-Mz	511.366	246994	3.3205	9.15231	0.888589	4.41898	3.4554	0.293327	3.33919	0.966369	1658.13	48.8216	1715.9	28.6186	1787.13	16.1921	1787.13	48.8216	92.782
08BC60-103	08BC60	pre-Mz	283.166	70226.2	2.42536	9.15212	0.768217	4.50229	2.39048	0.298851	2.26368	0.946956	1685.61	33.5763	1731.4	19.8637	1787.17	13.9982	1787.17	33.5763	94.3174
08BC60-50	08BC60	pre-Mz	353.943	60842.5	8.27856	9.14689	0.61798	4.5526	3.38983	0.302017	3.33303	0.983242	1701.3	49.8403	1740.64	28.2282	1788.21	11.2588	1788.21	49.8403	95.1401
08BC60-22	08BC60	pre-Mz	289.611	92491.3	6.73251	9.14221	0.749208	4.76914	4.1302	0.316221	4.06168	0.98341	1771.25	62.907	1779.48	34.6816	1789.14	13.6485	1789.14	62.907	98.9998
08BC60-9	08BC60	pre-Mz	762.004	160145	5.58559	9.13688	0.601706	4.79401	5.0401	0.317684	5.00405	0.992848	1778.41	77.7759	1783.85	42.3683	1790.2	10.9596	1790.2	77.7759	99.3411
08BC60-13	08BC60	pre-Mz	96.5521	39396.3	1.47513	9.13119	1.70811	4.64215	3.04185	0.307429	2.51698	0.827452	1728.04	38.1531	1756.88	25.4175	1791.34	31.1108	1791.34	38.1531	96.4666
08BC60-99	08BC60	pre-Mz	880.269	343102	2.14719	9.13016	0.438967	4.4114	2.66495	0.292115	2.62855	0.986341	1652.09	38.3083	1714.48	22.0625	1791.54	7.9954	1791.54	38.3083	92.2159
08BC60-11	08BC60	pre-Mz	458.903	86756.5	5.59644	9.1299	0.603531	4.86938	4.33867	0.322432	4.29649	0.990278	1801.6	67.5326	1796.97	36.5642	1791.59	10.9928	1791.59	67.5326	100.558
08BC60-114	08BC60	pre-Mz	373.747	212273	5.85995	9.12922	0.754009	4.60212	2.96627	0.304712	2.86884	0.967153	1714.63	43.1923	1749.65	24.7476	1791.73	13.7316	1791.73	43.1923	95.6971
08BC60-24	08BC60	pre-Mz	439.205	147481	2.87385	9.12097	0.699258	4.47574	4.13579	0.296077	4.07624	0.985603	1671.83	60.0295	1726.48	34.338	1793.38	12.7336	1793.38	60.0295	93.2222
08BC60-10	08BC60	pre-Mz	208.96	44432.5	2.08833	9.11867	1.29477	4.37085	3.71355	0.289066	3.48052	0.937249	1636.86	50.3144	1706.85	30.6955	1793.84	23.5736	1793.84	50.3144	91.249
08BC60-109	08BC60	pre-Mz	221.157	63368.5	1.87455	9.11495	0.988568	4.60023	2.5624	0.304111	2.36402	0.922583	1711.66	35.5379	1749.31	21.3754	1794.58	17.9977	1794.58	35.5379	95.3795
08BC60-4	08BC60	pre-Mz	421.362	135550	6.92755	9.1146	0.860444	4.58318	1.9231	0.302973	1.71987	0.894321	1706.03	25.78	1746.21	16.0307	1794.65	15.6646	1794.65	25.78	95.0622
08BC60-3	08BC60	pre-Mz	621.882	181943	5.34009	9.11339	0.398207	4.48727	3.04477	0.296593	3.01862	0.991411	1674.39	44.5133	1728.62	25.2871	1794.89	7.24998	1794.89	44.5133	93.2865
08BC60-20	08BC60	pre-Mz	400.97	145021	6.49305	9.10971	0.700998	4.6857	2.68888	0.309583	2.59589	0.965419	1738.66	39.5598	1764.69	22.5041	1795.63	12.7617	1795.63	39.5598	96.8273
08BC60-60	08BC60	pre-Mz	351.592	106534	3.16988	9.10388	1.14172	4.64874	4.0651	0.306945	3.90148	0.959749	1725.65	59.0693	1758.07	33.9818	1796.79	20.7788	1796.79	59.0693	96.0409
08BC60-65	08BC60	pre-Mz	176.472	32889	2.63722	9.09779	1.3848	4.58827	2.93842	0.30275	2.59165	0.881987	1704.93	38.826	1747.14	24.5019	1798.01	25.2002	1798.01	38.826	94.8231
08BC60-89	08BC60	pre-Mz	379.012	61283.4	1.99341	9.09562	1.1751	4.45861	2.17447	0.294124	1.82961	0.841404	1662.1	26.8061	1723.3	18.0363	1798.44	21.3821	1798.44	26.8061	92.4189
08BC60-102	08BC60	pre-Mz	184.495	50681.1	3.46612	9.09262	1.46917	4.39183	2.24804	0.289623	1.70154	0.756897	1639.64	24.6338	1710.8	18.5948	1799.04	26.7326	1799.04	24.6338	91.1397
08BC60-1	08BC60	pre-Mz	432.976	101608	2.21177	9.09121	0.596572	4.56927	1.11141	0.301278	0.937729	0.843729	1697.64	13.9957	1743.68	9.25903	1799.33	10.8556	1799.33	13.9957	94.3487
08BC60-61	08BC60	pre-Mz	269.748	126561	2.03684	9.08607	0.814028	4.8513	3.50644	0.319693	3.41064	0.972679	1788.23	53.2628	1793.84	29.5273	1800.36	14.8109	1800.36	53.2628	99.3264
08BC60-23	08BC60	pre-Mz	341.982	170208	3.44209	9.07259	0.651048	4.56842	2.79853	0.300605	2.72175	0.972563	1694.31	40.553	1743.53	23.3169	1803.06	11.8415	1803.06	40.553	93.9687
08BC60-62	08BC60	pre-Mz	280.794	53417.8	2.53754	9.07122	0.565496	4.85597	5.2785	0.319478	5.24812	0.994245	1787.18	81.9188	1794.65	44.4729	1803.33	10.2851	1803.33	81.9188	99.1042
08BC60-32	08BC60	pre-Mz	236.359	73026.9	3.88565	9.06338	1.19369	4.66362	1.91302	0.306558	1.49492	0.781442	1723.75	22.611	1760.74	15.9961	1804.9	21.705	1804.9	22.611	95.5036
08BC60-95	08BC60	pre-Mz	288.98	65779.7	5.24469	9.06267	1.12811	4.7545	2.59302	0.312507	2.33476	0.900403	1753.03	35.8364	1776.9	21.757	1805.05	20.5121	1805.05	35.8364	97.1185
08BC60-81	08BC60	pre-Mz	124.168	51479.3	1.15963	9.04503	1.17526	4.74559	2.94259	0.311314	2.69771	0.916779	1747.17	41.2868	1775.33	24.6832	1808.59	21.3603	1808.59	41.2868	96.6042
08BC60-67	08BC60	pre-Mz	133.555	56430.3	4.45317	9.00707	2.71905	4.739	4.3225	0.309577	3.36018	0.777368	1738.63	51.2068	1774.16	36.2577	1816.23	49.3789	1816.23	51.2068	95.7272
08BC60-21	08BC60	pre-Mz	187.868	66895.4	3.51901	8.99064	2.00634	4.7396	4.67451	0.309052	4.22204	0.903205	1736.04	64.2582	1774.27	39.214	1819.54	36.4182	1819.54	64.2582	95.4109
08BC60-85	08BC60	pre-Mz	434.13	128105	3.36121	8.98798	0.708918	4.81491	2.27541	0.313869	2.16216	0.950228	1759.72	33.297	1787.51	19.1331	1820.08	12.8654	1820.08	33.297	96.6838
08BC60-16	08BC60	pre-Mz	507.373	94653	8.03148	8.98652	1.0384	4.90997	9.03073	0.320014	8.97083	0.993367	1789.8	140.22	1803.97	76.3244	1820.37	18.8454	1820.37	140.22	98.3205
08BC60-75	08BC60	pre-Mz	650.994	118578	6.35526	8.98202	0.524497	4.85859	2.45534	0.316507	2.39867	0.976918	1772.65	37.1752	1795.11	20.6785	1821.28	9.51663	1821.28	37.1752	97.3297
08BC60-86	08BC60	pre-Mz	88.1005	21221.6	4.96604	8.96606	1.80783	4.73624	3.32439	0.307988	2.78986	0.83921	1730.8	42.3484	1773.67	27.8777	1824.51	32.794	1824.51	42.3484	94.864
08BC60-69	08BC60	pre-Mz	137.618	44373.4	3.9611	8.94752	2.23055	4.58358	3.13761	0.297445	2.20663	0.703284	1678.62	32.6113	1746.29	26.1587	1828.26	40.4464	1828.26	32.6113	91.8154
08BC60-71	08BC60	pre-Mz	432.385	42608.4	5.76617	8.91872	0.760466	4.98859	8.17793	0.322686	8.1425	0.995667	1802.83	128.073	1817.39	69.2787	1834.1	13.7794	1834.1	128.073	98.2949
08BC60-41	08BC60	pre-Mz	131.862	36953.9	2.6324	8.77513	1.71702	4.42836	3.82026	0.281835	3.41266	0.893305	1600.6	48.3707	1717.66	31.6547	1863.46	30.9995	1863.46	48.3707	85.8939
08BC60-70	08BC60	pre-Mz	115.812	22947.1	4.19079	8.72636	1.82665	5.02761	3.62156	0.318195	3.12715	0.863481	1780.91	48.6618	1823.98	30.6813	1873.52	32.9394	1873.52	48.6618	95.0571
08BC60-110	08BC60	pre-Mz	272.161	61866.4	2.16737	8.72269	1.32209	4.89307	3.42757	0.30955	3.16233	0.922615	1738.49	48.1883	1801.06	28.905	1874.27	23.8365	1874.27	48.1883	92.7555
08BC60-87	08BC60	pre-Mz	363.97	148180	2.02421	8.7178	1.57965	4.65491	2.22512	0.294318	1.56711	0.704284	1663.07	22.9719	1759.18	18.6002	1875.28	28.4781	1875.28	22.9719	88.6837
08BC60-111	08BC60	pre-Mz	80.9246	33310.4	5.30294	8.70414	2.04287	4.96406	5.61143	0.313373	5.22636	0.931378	1757.29	80.3922	1813.22	47.4586	1878.11	36.8193	1878.11	80.3922	93.5667
08BC60-14	08BC60	pre-Mz	93.6971	19783.3	1.56723	8.58787	2.99702	5.15735	3.22228	0.321226	1.18361	0.36732	1795.71	18.5507	1845.61	27.4114	1902.31	53.8666	1902.31	18.5507	94.3965
08BC60-42	08BC60	pre-Mz	238.715	91936.6	4.0823	8.48332	0.990909	5.30001	4.454	0.326093	4.34238	0.974938	1819.42	68.8382	1868.86	38.0644	1924.29	17.7598	1924.29	68.8382	94.5498
08BC60-28	08BC60	pre-Mz	313.456	143603	4.77037	8.16405	0.588141	5.85285	4.18991	0.346554	4.14843	0.990099	1918.12	68.8281	1954.27	36.351	1992.77	10.4556	1992.77	68.8281	96.2543
08BC60-77	08BC60	pre-Mz	191.698	134748	4.7633	6.75773	2.80579	7.62029	5.19506	0.373483	4.37221	0.841609	2045.77	76.6457	2187.26	46.6634	2322.68	48.1065	2322.68	76.6457	88.0779
08BC60-84	08BC60	pre-Mz	83.598	45400.7	0.927924	6.28866	1.41184	9.61739	3.3537	0.438646	3.04204	0.90707	2344.58	59.7937	2398.84	30.8551	2445.21	23.8955	2445.21	59.7937	95.8843
08BC60-7	08BC60	pre-Mz	233.816	104856	5.44876	5.61637	0.67095	10.7448	2.61518	0.437675	2.52764	0.966528	2340.23	49.606	2501.3	24.2978	2634.79	11.1449	2634.79	49.606	88.8203
08BC60-74	08BC60	pre-Mz	478.198	242215	1.10897	5.58364	0.380497	10.5116	2.39253	0.425682	2.36208	0.987273	2286.22	45.4655	2480.94	22.1865	2644.49	6.31314	2644.49	45.4655	86.4524
08BC60-40	08BC60	pre-Mz	143.085	69582.4	2.20186	5.49529	1.0749	10.943	2.71493	0.436141	2.49308	0.918284	2333.34	48.8082	2518.3	25.264	2670.93	17.7959	2670.93	48.8082	87.3606
08BC60-93	08BC60	pre-Mz	77.4329	90489.3	2.10156	5.45738	1.18018	12.443	1.82486	0.492503	1.39187	0.762725	2581.5	29.6082	2638.43	17.1526	2682.39	19.5183	2682.39	29.6082	96.2387
08BC60-106	08BC60	pre-Mz	130.345	81291.1	1.89369	5.42108	0.868889	12.1209	2.45247	0.476561	2.29339	0.935135	2512.27	47.7167	2613.8	23.008	2693.42	14.3542	2693.42	47.7167	93.2744
08BC60-82	08BC60	pre-Mz	71.986	24484.9	1.02127	5.32385	1.77196	12.5278	3.07821	0.483728	2.51705	0.817699	2543.48	52.9013	2644.82	28.953	2723.28	29.1967	2723.28	52.9013	93.3979
08BC60-94	08BC60	pre-Mz	69.9399	31393.5	1.58587	5.17398	1.91	13.4414	2.97593	0.50439	2.28212	0.766859	2632.64	49.3255	2711.17	28.1319	2770.22	31.336	2770.22	49.3255	95.0335
08BC60-37	08BC60	pre-Mz	232.992	76190.2	2.11959	4.92814	0.585029	14.4471	4.12041	0.516373	4.07867	0.989869	2683.78	89.5409	2779.53	39.1489	2849.79	9.52971	2849.79	89.5409	94.1748
08BC60-46	08BC60	pre-Mz	94.608	28437.9	1.07299	4.90767	0.735181	14.082	2.70477	0.501232	2.60294	0.962351	2619.09	56.0254	2755.24	25.6483	2856.56	11.9683	2856.56	56.0254	91.6867
08BC60-92	08BC60	pre-Mz	237.717	131455	2.97123	4.74616	0.396124	14.7037	2.9331	0.506137	2.90623	0.990838	2640.12	62.9601	2796.26	27.8927	2910.9	6.4177	2910.9	62.9601	90.6976
08SE259-68	08SE258	pre-Mz	1291.05	10710	5.66721	15.0075	1.70866	0.376093	1.8211	0.0409358	0.63	0.345944	258.631	1.59712	324.159	5.05377	826.349	35.6541	258.631	1.59712	NA	exclude	high U
08SE259-36	08SE258	pre-Mz	1327.06	13340	5.92322	14.8824	1.76074	0.484251	1.83035	0.0522689	0.5	0.273171	328.436	1.60105	400.985	6.06363	843.75	36.6397	328.436	1.60105	NA	exclude	high U
08SE258-24	08SE258	pre-Mz	1139.73	12760	7.57842	8.61239	1.67075	0.859065	1.83549	0.0536598	0.76	0.414059	336.951	2.49506	629.612	8.61239	1897.18	30.0419	336.951	2.49506	NA	exclude	high U
08SE258-26	08SE258	pre-Mz	967.723	2264	14.4333	19.1252	7.78962	0.102687	8.01093	0.0142436	1.87	0.233431	91.1726	1.69293	99.254	7.57505	297.999	177.952	91.1726	1.69293	NA	exclude	high U/Th
08SE259-95	08SE258	pre-Mz	1212.64	8156	12.7419	8.57347	3.58046	0.593686	5.42076	0.0369158	4.07	0.750817	233.687	9.34075	473.219	20.507	1905.33	64.3355	233.687	9.34075	NA	exclude	high U/Th
08SE259-41	08SE258	pre-Mz	685.966	13862	19.4356	6.71688	2.09051	0.807076	6.91363	0.0393171	6.59	0.953189	248.598	16.0708	600.813	31.3626	2333.07	35.799	248.598	16.0708	NA	exclude	high U/Th
08SE259-87	08SE258	pre-Mz	765.489	12156	14.9033	10.9478	2.93353	0.547834	7.91379	0.0434984	7.35	0.928759	274.482	19.751	443.577	28.448	1453.74	55.8231	274.482	19.751	NA	exclude	high U/Th
08SE259-56	08SE258	pre-Mz	664.696	42226	41.4268	11.9859	1.37035	0.907331	2.77236	0.0788739	2.41	0.869297	489.398	11.3579	655.638	13.3919	1279.32	26.7104	489.398	11.3579	NA	exclude	high U/Th
08SE258-68	08SE258	pre-Mz	180.331	6412	11.8498	11.3547	2.85423	1.04361	3.57339	0.0859436	2.15	0.601669	531.502	10.9689	725.712	18.531	1383.97	54.8322	531.502	10.9689	38.4041	exclude	high U/Th
08SE259-91	08SE258	pre-Mz	302.208	11370	4.57789	13.3472	1.67718	0.83811	3.38475	0.0811313	2.94	0.868602	502.872	14.2225	618.102	15.6719	1066.44	33.7242	502.872	14.2225	47.1543	exclude	low concordance
08SE259-94	08SE258	pre-Mz	216.279	7724	2.03744	13.5396	2.08109	0.827181	6.40738	0.0812278	6.06	0.945784	503.447	29.3482	612.047	29.4613	1037.56	42.0084	503.447	29.3482	48.5224	exclude	low concordance
08SE259-86	08SE258	pre-Mz	97.778	7490	4.24377	13.8498	3.69686	0.826082	4.53113	0.0829785	2.62	0.578222	513.877	12.9409	611.436	20.8161	991.677	75.1972	513.877	12.9409	51.819	exclude	low concordance
08SE258-39	08SE258	pre-Mz	198.785	8210	2.61165	13.5975	4.3909	0.854757	4.68021	0.0842948	1.62	0.346138	521.707	8.11871	627.256	21.9038	1028.93	88.8212	521.707	8.11871	50.7039	exclude	low concordance
08SE259-48	08SE258	pre-Mz	235.081	15372	6.65137	13.7903	2.59187	0.868264	4.28321	0.0868407	3.41	0.796132	536.826	17.5643	634.624	20.2148	1000.41	52.6413	536.826	17.5643	53.6607	exclude	low concordance
08SE259-43	08SE258	pre-Mz	892.521	52338	4.7976	13.724	2.1504	0.880623	3.70738	0.0876536	3.02	0.814592	541.645	15.6894	641.319	17.629	1010.18	43.6187	541.645	15.6894	53.6186	exclude	low concordance
08SE259-97	08SE258	pre-Mz	424.427	30120	4.57611	10.6342	2.61088	1.1457	7.58361	0.0883642	7.12	0.938867	545.856	37.2653	775.21	41.1382	1508.82	49.3147	545.856	37.2653	36.1777	exclude	low concordance
08SE258-46	08SE258	pre-Mz	135.012	6280	3.39876	13.7631	2.79683	0.944559	2.87596	0.0942855	0.670003	0.232966	580.833	3.72142	675.265	14.1857	1004.41	56.7708	580.833	3.72142	57.8285	exclude	low concordance
08SE258-17	08SE258	pre-Mz	104.453	3630	8.49082	13.9376	3.74191	0.938828	5.2203	0.0949016	3.64	0.697278	584.461	20.3385	672.269	25.6723	978.79	76.2833	584.461	20.3385	59.7126	exclude	low concordance
08SE258-29	08SE258	pre-Mz	282.478	10044	4.20846	13.257	1.75083	0.998101	2.84306	0.0959661	2.24	0.787884	590.725	12.6441	702.845	14.4212	1080.01	35.114	590.725	12.6441	54.6961	exclude	low concordance
08SE258-55	08SE258	pre-Mz	619.489	12174	3.79113	10.2612	1.74269	1.29463	4.10796	0.0963481	3.72	0.905558	592.972	21.0745	843.35	23.5379	1575.96	32.6225	592.972	21.0745	37.6262	exclude	low concordance
08SE258-75	08SE258	pre-Mz	793.729	20360	6.68651	14.0226	1.73309	0.953882	3.32704	0.0970111	2.84	0.853611	596.869	16.19	680.122	16.4939	966.394	35.3807	596.869	16.19	61.7625	exclude	low concordance
08SE258-78	08SE258	pre-Mz	164.559	7582	1.59126	13.2823	3.40168	1.31484	7.2302	0.126662	6.38	0.882409	768.795	46.238	852.254	41.7232	1076.22	68.3297	768.795	46.238	71.4346	exclude	low concordance
08SE258-92	08SE258	pre-Mz	466.58	24924	1.77724	13.3458	2.22303	1.35442	4.61123	0.131098	4.04	0.876122	794.128	30.1856	869.465	26.9413	1066.64	44.6996	794.128	30.1856	74.4515	exclude	low concordance
08SE258-49	08SE258	pre-Mz	277.592	18638	0.959641	13.1149	1.52395	1.47168	1.845	0.139983	1.04	0.563685	844.569	8.23247	918.818	11.1549	1101.64	30.4694	844.569	8.23247	76.6648	exclude	low concordance
08SE258-53	08SE258	pre-Mz	337.996	23874	2.96167	13.0625	0.911895	1.52156	2.17082	0.144149	1.97	0.907492	868.084	15.9998	939.104	13.3014	1109.6	18.2353	868.084	15.9998	78.2337	exclude	low concordance
08SE258-64	08SE258	pre-Mz	318.985	32066	4.49782	13.0895	1.79657	1.53223	2.14396	0.145461	1.17	0.545719	875.47	9.57792	943.392	13.1732	1105.51	35.9133	875.47	9.57792	79.1917	exclude	low concordance
08SE258-10	08SE258	pre-Mz	207.131	9294	1.58047	11.6861	2.83245	1.83638	3.45589	0.155644	1.98	0.572935	932.522	17.1906	1058.57	22.7227	1328.51	54.8284	932.522	17.1906	70.1933	exclude	low concordance
08SE258-93	08SE258	pre-Mz	307.554	16912	2.10152	12.1116	1.57244	1.86135	2.15939	0.163505	1.48	0.685378	976.225	13.4074	1067.47	14.2642	1258.97	30.7399	976.225	13.4074	77.5413	exclude	low concordance
08SE258-41	08SE258	pre-Mz	99.6195	7258	1.91121	11.6176	1.9196	2.11144	6.18541	0.177907	5.88	0.950625	1055.53	57.2518	1152.55	42.6452	1339.88	37.1006	1339.88	57.2518	78.7782	exclude	low concordance
08SE258-28	08SE258	pre-Mz	134.714	8460	2.40895	11.174	1.75043	2.15391	4.9592	0.174556	4.64	0.935636	1037.17	44.4534	1166.31	34.4022	1414.72	33.4813	1414.72	44.4534	73.3124	exclude	low concordance
08SE258-27	08SE258	pre-Mz	227.983	15472	1.20539	10.2042	1.77068	2.73772	5.50267	0.202612	5.21	0.946813	1189.34	56.5858	1338.76	40.9469	1586.38	33.1015	1586.38	56.5858	74.972	exclude	low concordance
08SE258-45	08SE258	pre-Mz	90.2109	10352	3.54644	8.23121	1.4198	4.55793	2.37189	0.272101	1.9	0.801051	1551.46	26.1989	1741.61	19.753	1978.19	25.2853	1978.19	26.1989	78.4281	exclude	low concordance
08SE259-61	08SE258	pre-Mz	199.29	4762	7.08517	14.8741	2.60502	0.444325	3.20671	0.0479326	1.87	0.583152	301.817	5.51389	373.298	10.0171	844.916	54.2023	301.817	5.51389	NA
08SE259-98	08SE258	pre-Mz	271.713	9764	6.08375	11.0179	3.40141	0.688433	5.35037	0.0550123	4.13	0.771909	345.221	13.8826	531.859	22.1544	1441.58	64.8375	345.221	13.8826	NA
08SE259-93	08SE258	pre-Mz	175.201	4558	3.84285	14.0903	2.68385	0.541935	7.36632	0.0553816	6.86	0.931266	347.477	23.206	439.699	26.2941	956.557	54.8779	347.477	23.206	NA
08SE259-55	08SE258	pre-Mz	161.49	11552	3.70926	12.0842	1.5291	0.723663	9.98775	0.0634238	9.87	0.988211	396.414	37.9478	552.827	42.6026	1263.4	29.8549	396.414	37.9478	NA
08SE259-52	08SE258	pre-Mz	286.29	16492	3.80154	13.4869	1.43904	0.817753	3.79354	0.0799897	3.51	0.925258	496.061	16.7587	606.794	17.3302	1045.46	29.0452	496.061	16.7587	NA
08SE258-79	08SE258	pre-Mz	282.646	14836	4.22795	13.7996	3.93374	1.42885	6.27586	0.143005	4.89	0.779176	861.633	39.4399	901.07	37.5048	999.041	79.9096	861.633	39.4399	86.246
08SE258-81	08SE258	pre-Mz	143.85	10176	2.04531	13.6226	3.52352	1.45991	4.21323	0.144239	2.31	0.548273	868.59	18.7715	913.972	25.3947	1025.21	71.308	868.59	18.7715	84.7232
08SE258-83	08SE258	pre-Mz	375.682	26686	4.3087	13.2226	1.70217	1.51593	3.86501	0.145376	3.47	0.897799	874.991	28.392	936.835	23.6504	1085.23	34.13	874.991	28.392	80.6274
08SE258-31	08SE258	pre-Mz	255.315	16216	3.82894	13.6532	1.53145	1.47976	4.22717	0.146529	3.94	0.932066	881.477	32.4606	922.132	25.6185	1020.66	31.0246	881.477	32.4606	86.3631
08SE258-20	08SE258	pre-Mz	156.771	8776	2.17595	13.9653	2.01235	1.49808	4.48661	0.151735	4.01	0.893771	910.679	34.0564	929.606	27.3263	974.761	41.0198	910.679	34.0564	93.4259
08SE258-67	08SE258	pre-Mz	159.7	9428	1.96408	12.8409	4.63571	1.6561	5.38493	0.154234	2.74001	0.508829	924.656	23.6025	991.887	34.1048	1143.72	92.1871	924.656	23.6025	80.8463
08SE258-98	08SE258	pre-Mz	264.179	18114	1.99708	13.4423	1.24844	1.59994	2.14154	0.155983	1.74	0.812499	934.412	15.1354	970.186	13.382	1052.14	25.1563	934.412	15.1354	88.8106
08SE258-16	08SE258	pre-Mz	60.4301	4280	2.76452	14.439	3.5922	1.51184	3.87008	0.158323	1.44001	0.372088	947.45	12.6882	935.185	23.6561	906.376	74.0548	947.45	12.6882	104.532
08SE258-100	08SE258	pre-Mz	134.208	6870	1.78623	13.0608	2.26498	1.67529	4.67528	0.158693	4.09	0.874814	949.509	36.1107	999.194	29.7358	1109.86	45.2313	949.509	36.1107	85.552
08SE258-19	08SE258	pre-Mz	57.9289	3292	1.49518	13.8593	3.37476	1.58433	4.74812	0.159252	3.34	0.703437	952.62	29.5785	964.073	29.5646	990.301	68.656	952.62	29.5785	96.1951
08SE258-43	08SE258	pre-Mz	251.388	11282	2.78078	12.8443	1.91414	1.71252	1.97837	0.159531	0.500001	0.252734	954.17	4.43457	1013.23	12.683	1143.17	38.0513	954.17	4.43457	83.4668
08SE258-37	08SE258	pre-Mz	133.223	12298	1.97257	13.6221	2.50921	1.63637	3.07067	0.161668	1.77	0.576421	966.042	15.8794	984.316	19.3549	1025.28	50.7801	966.042	15.8794	94.2226
08SE258-51	08SE258	pre-Mz	114.575	15134	2.57173	13.8899	2.36445	1.60508	3.1958	0.161695	2.15	0.672758	966.187	19.2913	972.191	19.9959	985.78	48.129	966.187	19.2913	98.0125
08SE258-33	08SE258	pre-Mz	99.2567	11226	2.34394	13.3051	2.59248	1.67816	3.6575	0.161938	2.58	0.705399	967.54	23.1796	1000.28	23.2749	1072.78	52.1007	967.54	23.1796	90.1901
08SE258-56	08SE258	pre-Mz	278.214	19228	2.01045	13.0136	2.35588	1.72281	3.32051	0.162605	2.34	0.704711	971.235	21.0978	1017.07	21.3363	1117.14	46.998	971.235	21.0978	86.9397
08SE258-63	08SE258	pre-Mz	216.605	15544	2.30661	13.4461	1.60011	1.66757	1.88161	0.162622	0.990001	0.526147	971.333	8.92679	996.26	11.9439	1051.56	32.2449	971.333	8.92679	92.3703
08SE258-30	08SE258	pre-Mz	52.6155	3376	2.80295	14.0305	3.75451	1.60103	4.39258	0.162919	2.28	0.519058	972.978	20.591	970.612	27.4606	965.279	76.6609	972.978	20.591	100.798
08SE258-101	08SE258	pre-Mz	76.0203	13320	2.45034	13.3619	1.36218	1.68358	2.78576	0.163155	2.43	0.872295	974.288	21.973	1002.34	17.7475	1064.21	27.3977	974.288	21.973	91.55
08SE259-71	08SE258	pre-Mz	52.5253	7574	1.82145	13.7503	1.45767	1.63763	3.40752	0.163315	3.08	0.903883	975.173	27.8741	984.8	21.485	1006.3	29.5606	975.173	27.8741	96.9069
08SE258-86	08SE258	pre-Mz	83.0443	7710	3.49717	13.9911	2.16616	1.64313	2.28269	0.166733	0.720004	0.315419	994.085	6.63289	986.914	14.4098	970.992	44.1826	994.085	6.63289	102.378
08SE259-4	08SE258	pre-Mz	100.442	12056	2.68402	13.6229	1.52236	1.74104	1.87818	0.172019	1.1	0.585674	1023.23	10.4077	1023.85	12.1139	1025.16	30.8138	1025.16	10.4077	99.8111
08SE259-100	08SE258	pre-Mz	95.9885	14756	3.65407	13.5837	1.65824	1.76481	2.00104	0.173866	1.12	0.55971	1033.38	10.6938	1032.61	12.97	1030.98	33.5391	1030.98	10.6938	100.232
08SE258-91	08SE258	pre-Mz	123.335	10504	3.73916	13.5099	2.3781	1.72693	2.97048	0.16921	1.78	0.59923	1007.75	16.6063	1018.61	19.1033	1041.99	47.9765	1041.99	16.6063	96.7143
08SE259-22	08SE258	pre-Mz	134.884	9560	2.97129	13.509	2.88944	1.7839	3.45267	0.174781	1.89	0.547403	1038.4	18.1267	1039.6	22.4685	1042.12	58.3151	1042.12	18.1267	99.6434
08SE258-97	08SE258	pre-Mz	78.3919	6190	1.72634	13.4889	2.05559	1.76514	2.96013	0.172685	2.13	0.719564	1026.89	20.2196	1032.74	19.1891	1045.17	41.4706	1045.17	20.2196	98.2508
08SE258-54	08SE258	pre-Mz	47.1595	8574	2.44526	13.3361	3.12063	1.84248	3.69043	0.17821	1.97001	0.533815	1057.19	19.2086	1060.75	24.2938	1068.1	62.7491	1068.1	19.2086	98.9782
08SE259-101	08SE258	pre-Mz	191.315	27982	3.59792	13.2337	1.89085	1.8603	2.87823	0.178552	2.17	0.753935	1059.06	21.1931	1067.09	19.0098	1083.54	37.9058	1083.54	21.1931	97.7407
08SE258-88	08SE258	pre-Mz	412.254	32162	2.19503	13.2269	1.39035	1.8049	1.76053	0.173145	1.08	0.613452	1029.42	10.2755	1047.24	11.5034	1084.61	27.8613	1084.61	10.2755	94.9115
08SE258-95	08SE258	pre-Mz	82.7592	9408	2.0455	12.9937	1.35264	1.96722	2.66826	0.185388	2.3	0.861984	1096.35	23.1884	1104.36	17.9642	1120.19	26.9802	1120.19	23.1884	97.8715
08SE259-45	08SE258	pre-Mz	108.924	16270	3.70493	12.9742	1.90363	2.02964	1.9682	0.190985	0.500002	0.25404	1126.71	5.16872	1125.5	13.3891	1123.15	37.9502	1123.15	5.16872	100.317
08SE258-87	08SE258	pre-Mz	38.5415	4344	2.00862	12.9255	2.04142	2.04762	2.18896	0.191953	0.790037	0.360919	1131.95	8.20166	1131.5	14.9344	1130.64	40.6757	1130.64	8.20166	100.115
08SE258-6	08SE258	pre-Mz	86.66	7658	2.76058	12.8945	1.85625	2.03159	1.92241	0.189994	0.500003	0.260092	1121.34	5.14618	1126.15	13.0817	1135.41	36.9558	1135.41	5.14618	98.7607
08SE259-18	08SE258	pre-Mz	138.831	22904	2.63758	12.8851	1.6829	2.07927	2.6062	0.194311	1.99	0.763565	1144.68	20.8714	1141.99	17.8709	1136.91	33.491	1136.91	20.8714	100.684
08SE258-7	08SE258	pre-Mz	283.942	35216	4.35755	12.7651	1.30174	1.81817	1.74359	0.168329	1.16	0.665293	1002.9	10.7738	1052.03	11.4225	1155.45	25.8301	1155.45	10.7738	86.797
08SE259-24	08SE258	pre-Mz	336.225	46496	1.00877	12.5782	1.28041	2.18951	1.37457	0.19974	0.5	0.36375	1173.92	5.3662	1177.71	9.5815	1184.69	25.2982	1184.69	5.3662	99.0912
08SE258-12	08SE258	pre-Mz	250.766	16398	2.19073	12.5497	0.594089	2.02517	2.08637	0.184329	2	0.958603	1090.58	20.0664	1123.99	14.1828	1189.18	11.7124	1189.18	20.0664	91.7086
08SE258-23	08SE258	pre-Mz	198.656	14062	2.30363	12.4518	1.20495	2.29236	2.07557	0.207022	1.69	0.814232	1212.93	18.6856	1209.94	14.6749	1204.58	23.7196	1204.58	18.6856	100.693
08SE258-14	08SE258	pre-Mz	128.104	7482	1.16038	12.2832	3.13455	2.04769	3.6347	0.182421	1.84	0.506233	1080.19	18.2995	1131.53	24.8015	1231.43	61.5103	1231.43	18.2995	87.7182
08SE258-70	08SE258	pre-Mz	70.2663	4080	1.49107	12.1245	2.41212	2.24989	3.16558	0.197844	2.05001	0.647593	1163.73	21.8272	1196.75	22.2559	1256.9	47.1709	1256.9	21.8272	92.5873
08SE258-57	08SE258	pre-Mz	442.916	32844	2.15963	11.805	2.3105	2.11443	3.8423	0.181033	3.07	0.799	1072.62	30.3358	1153.52	26.4932	1308.88	44.8333	1308.88	30.3358	81.949
08SE258-2	08SE258	pre-Mz	49.0257	4946	0.908114	11.7987	3.06552	2.61049	4.30323	0.223386	3.02	0.701799	1299.74	35.5486	1303.59	31.6025	1309.92	59.4876	1309.92	35.5486	99.2225
08SE258-72	08SE258	pre-Mz	175.588	10548	2.33545	11.6376	1.98061	2.29781	3.03526	0.193944	2.3	0.757761	1142.71	24.0847	1211.62	21.4773	1336.55	38.2979	1336.55	24.0847	85.4966
08SE258-65	08SE258	pre-Mz	88.578	10414	2.5599	11.5233	1.97076	2.54675	2.94619	0.212845	2.19	0.743334	1243.96	24.7755	1285.51	21.4838	1355.6	38.0063	1355.6	24.7755	91.764
08SE258-44	08SE258	pre-Mz	76.9793	4916	1.27228	11.4509	3.33278	2.2441	4.14235	0.186372	2.46001	0.593867	1101.69	24.9125	1194.94	29.1034	1367.75	64.1754	1367.75	24.9125	80.5479
08SE258-8	08SE258	pre-Mz	131.824	12658	1.88087	11.432	1.95282	2.35439	2.91932	0.195208	2.17	0.743325	1149.53	22.8473	1228.89	20.8083	1370.94	37.5791	1370.94	22.8473	83.8494
08SE258-34	08SE258	pre-Mz	115.223	11842	1.37562	11.3817	1.57703	2.60837	2.89688	0.215315	2.43	0.838833	1257.07	27.7531	1303	21.2658	1379.42	30.3108	1379.42	27.7531	91.1302
08SE258-94	08SE258	pre-Mz	116.247	17460	2.26318	11.341	4.59116	2.56379	9.90794	0.210878	8.78	0.886158	1233.49	98.5773	1290.37	72.497	1386.3	88.2023	1386.3	98.5773	88.9773
08SE258-74	08SE258	pre-Mz	71.8733	7086	3.00811	11.2651	2.7171	2.84183	3.23732	0.232183	1.76	0.54366	1345.93	21.3791	1366.65	24.3197	1399.18	52.088	1399.18	21.3791	96.1944
08SE258-77	08SE258	pre-Mz	122.791	16042	2.02616	11.1722	3.98355	2.93596	4.06507	0.237896	0.810004	0.19926	1375.75	10.0348	1391.23	30.7985	1415.03	76.2181	1415.03	10.0348	97.224
08SE258-1	08SE258	pre-Mz	267.808	21764	1.66641	11.0809	1.2492	2.54923	2.92968	0.204873	2.65	0.904537	1201.44	29.0476	1286.22	21.3692	1430.71	23.8415	1430.71	29.0476	83.9755
08SE258-102	08SE258	pre-Mz	204.125	25022	3.53701	10.9764	1.86134	2.93632	2.22006	0.233756	1.21	0.54503	1354.15	14.7787	1391.32	16.817	1448.77	35.4394	1448.77	14.7787	93.4693
08SE258-66	08SE258	pre-Mz	53.4838	6744	1.35559	10.9537	1.68961	2.81381	10.0037	0.223539	9.86	0.985633	1300.55	116.139	1359.22	75.0788	1452.71	32.1522	1452.71	116.139	89.5256
08SE258-60	08SE258	pre-Mz	204.241	20436	2.19558	10.9353	1.65194	2.66171	2.01854	0.211102	1.16	0.574673	1234.68	13.0343	1317.9	14.8996	1455.91	31.4217	1455.91	13.0343	84.8052
08SE259-60	08SE258	pre-Mz	114.921	27974	1.98251	10.9233	1.23237	3.21693	1.63206	0.254855	1.07	0.655613	1463.46	14.0088	1461.25	12.6425	1458.01	23.4336	1458.01	14.0088	100.374
08SE258-47	08SE258	pre-Mz	140.831	16576	2.21629	10.8811	0.7219	2.62728	2.8045	0.207337	2.71	0.966303	1214.61	30.0012	1308.3	20.6287	1465.36	13.7131	1465.36	30.0012	82.8884
08SE258-89	08SE258	pre-Mz	144.148	18390	2.81042	10.8588	1.02977	3.11787	1.14474	0.24555	0.500005	0.436785	1415.49	6.35436	1437.11	8.80103	1469.24	19.5514	1469.24	6.35436	96.3412
08SE258-42	08SE258	pre-Mz	160.309	17888	1.74119	9.98727	2.03094	3.46285	4.83703	0.25083	4.39	0.907583	1442.75	56.7512	1518.8	38.1271	1626.43	37.7697	1626.43	56.7512	88.7065
08SE258-22	08SE258	pre-Mz	119.564	15696	1.48479	9.83473	1.80138	3.79201	3.62002	0.270477	3.14	0.867398	1543.22	43.0941	1591.05	29.0946	1655	33.3785	1655	43.0941	93.2459
08SE259-96	08SE258	pre-Mz	122.112	29350	1.26778	9.72891	2.00088	4.17104	2.0624	0.294311	0.500002	0.242436	1663.04	7.32923	1668.35	16.8931	1675.02	36.9796	1675.02	7.32923	99.2846
08SE258-36	08SE258	pre-Mz	137.306	15504	2.48029	9.68271	1.81256	3.36286	2.29028	0.236159	1.4	0.61128	1366.7	17.2416	1495.79	17.9267	1683.81	33.4608	1683.81	17.2416	81.1668
08SE259-19	08SE258	pre-Mz	90.1215	23530	2.06189	9.65413	1.40021	4.06038	3.01488	0.284301	2.67	0.885608	1612.99	38.1018	1646.38	24.5679	1689.27	25.8309	1689.27	38.1018	95.4843
08SE258-18	08SE258	pre-Mz	243.638	20862	3.51061	9.48628	1.36462	3.72598	2.91866	0.256351	2.58	0.883967	1471.15	33.9365	1576.97	23.369	1721.56	25.0701	1721.56	33.9365	85.4546
08SE258-58	08SE258	pre-Mz	176.56	26776	3.46886	9.4014	0.603902	4.32356	0.830422	0.294804	0.570002	0.686401	1665.49	8.36611	1697.87	6.84817	1738.05	11.071	1738.05	8.36611	95.8251
08SE258-62	08SE258	pre-Mz	334.601	29702	3.99823	9.1349	2.08196	4.02099	2.35003	0.266401	1.09	0.463824	1522.51	14.7812	1638.45	19.1117	1790.6	37.9257	1790.6	14.7812	85.0277
08SE259-27	08SE258	pre-Mz	29.3841	11840	0.970406	5.309	1.24197	13.2849	1.44064	0.511526	0.73002	0.506735	2663.14	15.926	2700.11	13.6048	2727.88	20.4534	2727.88	15.926	97.6268
08TC44-58	08TC44	PTr-K	1207.67	3414	3.87913	17.1479	8.08346	0.357279	8.12494	0.0444342	0.820002	0.100924	280.26	2.2489	310.181	21.7197	541.68	177.005	280.26	2.2489	NA	exclude	high U
08TC44-50	08TC44	PTr-K	1029.24	4034	2.16967	16.3418	10.4486	0.392065	10.6146	0.0464683	1.87	0.176173	292.802	5.35292	335.877	30.3641	646.037	225.07	292.802	5.35292	NA	exclude	high U
08TC44-88	08TC44	PTr-K	1503.07	94156	22.0928	9.44711	1.65031	4.10394	2.15126	0.281189	1.38	0.641484	1597.35	19.5247	1655.09	17.5656	1729.15	30.2912	1729.15	19.5247	92.3776	exclude	high U/Th
08TC44-59	08TC44	PTr-K	34.2031	2654	1.84301	17.7678	5.81918	0.690272	5.92979	0.0889513	1.14	0.19225	549.332	6.00301	532.964	24.5934	463.517	129.053	549.332	6.00301	118.514	exclude	reverse discordance
08TC44-31	08TC44	PTr-K	66.6174	4124	1.12605	17.2617	3.64849	0.774739	4.65442	0.0969922	2.89	0.620916	596.758	16.4722	582.478	20.6336	527.205	79.995	596.758	16.4722	113.193	exclude	reverse discordance
08TC44-89	08TC44	PTr-K	18.3336	1210	1.16751	17.5425	5.42429	0.764151	5.58024	0.0972231	1.31003	0.234762	598.115	7.48295	576.402	24.5477	491.726	119.697	598.115	7.48295	121.636	exclude	reverse discordance
08TC44-70	08TC44	PTr-K	360.674	6724	1.20181	19.752	2.93697	0.250421	3.20779	0.0358741	1.29	0.402146	227.208	2.87993	226.918	6.52313	223.938	67.9205	227.208	2.87993	NA
08TC44-26	08TC44	PTr-K	154.097	2626	0.930987	20.2025	4.97112	0.255525	5.02738	0.0374402	0.750004	0.149184	236.947	1.74484	231.054	10.3895	171.5	116.119	236.947	1.74484	NA
08TC44-72	08TC44	PTr-K	371.629	10416	1.05229	19.8177	2.75888	0.260667	2.86976	0.0374661	0.79	0.275285	237.107	1.83912	235.205	6.02513	216.259	63.8988	237.107	1.83912	NA
08TC44-99	08TC44	PTr-K	393.856	8542	1.27082	19.8074	2.20943	0.26302	2.28685	0.0377847	0.590001	0.257997	239.087	1.38477	237.098	4.8356	217.446	51.1511	239.087	1.38477	NA
08TC44-66	08TC44	PTr-K	582.027	12520	1.56799	19.4046	0.892291	0.275857	1.47939	0.0388228	1.18	0.797628	245.532	2.8428	247.366	3.24785	264.803	20.4737	245.532	2.8428	NA
08TC44-11	08TC44	PTr-K	229.666	7052	1.41279	20.074	4.44594	0.276462	4.56144	0.0402502	1.02	0.223614	254.383	2.54418	247.847	10.0317	186.38	103.57	254.383	2.54418	NA
08TC44-25	08TC44	PTr-K	348.705	2192	1.29272	15.5034	15.8862	0.369581	15.8991	0.0415562	0.640029	0.0402557	262.472	1.64616	319.343	43.5904	758.11	337.085	262.472	1.64616	NA
08TC44-33	08TC44	PTr-K	497.055	12644	4.01125	18.9669	3.201	0.315878	4.4491	0.0434524	3.09	0.694522	274.197	8.29503	278.727	10.8448	316.897	72.7877	274.197	8.29503	NA
08TC44-63	08TC44	PTr-K	629.679	7132	2.98759	18.5954	3.18564	0.330026	3.22464	0.0445095	0.500001	0.155056	280.725	1.3735	289.586	8.12472	361.688	71.8763	280.725	1.3735	NA
08TC44-1	08TC44	PTr-K	455.977	8160	1.07676	18.0017	17.2789	0.357664	17.2861	0.0466969	0.500001	0.028925	294.211	1.43799	310.469	46.2712	434.414	387.411	294.211	1.43799	NA
08TC44-64	08TC44	PTr-K	154.248	4746	0.934731	19.544	3.73017	0.360774	3.77654	0.0511386	0.590001	0.156228	321.508	1.85037	312.793	10.1669	248.322	85.9041	321.508	1.85037	NA
08TC44-83	08TC44	PTr-K	425.789	12554	2.11359	13.8633	4.08281	0.522879	8.08639	0.0525734	6.98	0.863178	330.302	22.4745	427.073	28.1989	989.676	83.0973	330.302	22.4745	NA
08TC44-27	08TC44	PTr-K	264.451	9204	1.6043	19.0078	2.66989	0.399325	2.83724	0.0550501	0.96	0.338357	345.452	3.22905	341.159	8.22135	311.989	60.7472	345.452	3.22905	NA
08TC44-46	08TC44	PTr-K	285.557	8834	1.83849	18.8847	2.56148	0.409933	2.62413	0.0561463	0.570001	0.217215	352.146	1.9534	348.827	7.74709	326.807	58.1478	352.146	1.9534	NA
08TC44-40	08TC44	PTr-K	148.206	6012	1.51131	18.8926	3.17028	0.42342	3.43796	0.0580178	1.33	0.386858	363.559	4.70152	358.493	10.3845	325.848	71.9857	363.559	4.70152	NA
08TC44-53	08TC44	PTr-K	166.044	6762	1.2894	19.0602	3.23909	0.426417	3.63061	0.0589468	1.64	0.451715	369.217	5.88503	360.629	11.0208	305.75	73.8133	369.217	5.88503	NA
08TC44-44	08TC44	PTr-K	630.268	12948	2.48562	17.8202	1.29775	0.473206	2.71082	0.0611593	2.38	0.877962	382.672	8.84254	393.401	8.84156	456.98	28.8027	382.672	8.84254	NA
08TC44-87	08TC44	PTr-K	301.678	3880	0.797829	17.1121	2.2563	0.496396	2.57458	0.0616069	1.24	0.481632	385.39	4.63881	409.26	8.6722	546.212	49.2881	385.39	4.63881	NA
08TC44-80	08TC44	PTr-K	151.576	5624	1.02068	18.249	1.59952	0.478745	2.68776	0.0633637	2.16	0.803643	396.05	8.29719	397.211	8.83572	403.954	35.8159	396.05	8.29719	NA
08TC44-5	08TC44	PTr-K	428.713	12950	2.9665	18.0528	1.55408	0.493266	1.63254	0.0645838	0.5	0.306272	403.442	1.95538	407.134	5.47572	428.106	34.6735	403.442	1.95538	NA
08TC44-2	08TC44	PTr-K	171.382	6546	0.925465	18.2659	1.68966	0.520254	1.76209	0.0689216	0.5	0.283755	429.655	2.07825	425.321	6.12296	401.876	37.8483	429.655	2.07825	NA
08TC44-38	08TC44	PTr-K	528.715	7014	0.777526	16.7718	5.02991	0.571929	5.47804	0.0695696	2.17	0.396127	433.562	9.0989	459.261	20.2405	589.956	109.127	433.562	9.0989	NA
08TC44-82	08TC44	PTr-K	245.219	11400	1.88112	17.9895	1.84105	0.53386	1.99558	0.0696539	0.77	0.385852	434.07	3.2323	434.368	7.05259	435.927	40.9964	434.07	3.2323	NA
08TC44-100	08TC44	PTr-K	207.632	5306	3.25755	16.8656	13.8593	0.57879	13.9192	0.0707981	1.29	0.092678	440.962	5.49823	463.684	51.8583	577.857	302.499	440.962	5.49823	NA
08TC44-95	08TC44	PTr-K	328.669	13928	2.09627	17.7944	1.31039	0.563329	1.72381	0.0727019	1.12	0.649723	452.413	4.89331	453.691	6.30721	460.179	29.0772	452.413	4.89331	NA
08TC44-39	08TC44	PTr-K	630.11	16816	5.72428	16.746	1.68609	0.600895	5.66666	0.0729806	5.41	0.954707	454.088	23.721	477.801	21.6002	593.313	36.5634	454.088	23.721	NA
08TC44-90	08TC44	PTr-K	144.04	4222	0.892057	16.1774	15.1211	0.632811	15.184	0.0742473	1.38	0.0908854	461.694	6.14857	497.845	59.8212	667.691	325.425	461.694	6.14857	NA
08TC44-13	08TC44	PTr-K	298.338	12978	1.47312	17.7272	1.58869	0.584671	1.66552	0.075171	0.5	0.300208	467.234	2.25352	467.459	6.23959	468.56	35.1765	467.234	2.25352	NA
08TC44-47	08TC44	PTr-K	307.347	14710	1.05448	17.7691	1.21268	0.586608	1.32344	0.0755983	0.53	0.400471	469.796	2.40136	468.699	4.9684	463.351	26.8853	469.796	2.40136	NA
08TC44-54	08TC44	PTr-K	141.08	8818	1.17511	16.7529	2.7543	0.724542	3.37471	0.0880344	1.95	0.577827	543.902	10.171	553.345	14.3975	592.377	59.7276	543.902	10.171	91.8168
08TC44-93	08TC44	PTr-K	526.43	16974	0.974886	16.8042	0.822873	0.755066	1.81701	0.0920242	1.62	0.891575	567.497	8.80042	571.159	7.93756	585.783	17.8384	567.497	8.80042	96.8784
08TC44-68	08TC44	PTr-K	389.201	20170	1.17205	16.4929	1.02319	0.838294	1.56183	0.100275	1.18	0.755522	616.018	6.93251	618.204	7.23191	626.193	22.0774	616.018	6.93251	98.3751
08TC44-81	08TC44	PTr-K	359.711	26050	1.473	16.3918	1.28927	0.855515	1.49155	0.101707	0.75	0.502833	624.407	4.4634	627.672	6.98293	639.471	27.7415	624.407	4.4634	97.6443
08TC44-73	08TC44	PTr-K	17.4859	1714	0.942866	14.4739	3.67732	1.50159	3.8441	0.157629	1.12003	0.291363	943.588	9.83138	931.033	23.4335	901.407	75.8352	943.588	9.83138	104.679
08TC44-36	08TC44	PTr-K	116.288	10422	3.35135	13.6527	0.975881	1.59202	1.09652	0.15764	0.500002	0.455992	943.647	4.38917	967.091	6.83852	1020.74	19.7569	943.647	4.38917	92.4471
08TC44-74	08TC44	PTr-K	525.468	47462	1.79942	13.5325	0.731582	1.70253	1.84155	0.167098	1.69	0.917704	996.103	15.598	1009.48	11.7803	1038.61	14.7892	996.103	15.598	95.9072
08TC44-86	08TC44	PTr-K	250.686	21170	1.09408	13.2692	1.345	1.7368	3.04334	0.167146	2.73	0.897041	996.365	25.203	1022.28	19.6129	1078.18	26.9961	996.365	25.203	92.4116
08TC44-84	08TC44	PTr-K	163.738	21128	3.0098	13.442	1.51254	1.80555	1.59304	0.176024	0.500001	0.313865	1045.22	4.82442	1047.47	10.4103	1052.19	30.4896	1052.19	4.82442	99.337
08TC44-7	08TC44	PTr-K	209.816	20748	2.87374	13.4397	0.924243	1.77359	1.33982	0.172878	0.97	0.723976	1027.95	9.21674	1035.83	8.69959	1052.54	18.64	1052.54	9.21674	97.6639
08TC44-22	08TC44	PTr-K	80.1449	8276	1.61275	13.323	1.17147	1.86483	1.27371	0.180194	0.500005	0.392557	1068.03	4.92129	1068.7	8.41883	1070.08	23.5409	1070.08	4.92129	99.809
08TC44-71	08TC44	PTr-K	299.782	28550	2.4023	12.9816	0.620381	1.86362	0.796789	0.175462	0.5	0.627519	1042.14	4.81131	1068.27	5.26525	1122.03	12.3697	1122.03	4.81131	92.8793
08TC44-3	08TC44	PTr-K	218.545	8428	1.78704	12.9641	1.7339	1.81554	1.80456	0.170705	0.50001	0.277082	1015.99	4.69998	1051.08	11.8158	1124.7	34.5626	1124.7	4.69998	90.3345
08TC44-18	08TC44	PTr-K	464.066	38288	3.9153	12.7815	1.7008	1.99757	2.41181	0.185175	1.71	0.709012	1095.19	17.2233	1114.69	16.3208	1152.91	33.7612	1152.91	17.2233	94.9934
08TC44-37	08TC44	PTr-K	115.382	9016	0.776018	12.6894	1.2566	2.10148	2.65606	0.193405	2.34	0.881005	1139.79	24.4464	1149.29	18.2756	1167.24	24.9043	1167.24	24.4464	97.6487
08TC44-69	08TC44	PTr-K	280.457	7592	1.61712	12.2279	1.24505	2.20208	2.32202	0.195292	1.96001	0.844096	1149.98	20.6437	1181.7	16.2156	1240.25	24.3899	1240.25	20.6437	92.7218
08TC44-21	08TC44	PTr-K	689.831	73042	3.10745	12.1624	2.87014	2.25969	3.11477	0.199328	1.21	0.388472	1171.71	12.9639	1199.81	21.9279	1250.77	56.1804	1250.77	12.9639	93.6787
08TC44-35	08TC44	PTr-K	626.446	57014	2.39158	11.9662	0.770597	2.40944	1.46844	0.209109	1.25	0.851243	1224.07	13.9359	1245.41	10.5374	1282.51	14.9942	1282.51	13.9359	95.4433
08TC44-43	08TC44	PTr-K	127.531	11686	0.803576	11.8593	1.1377	2.41064	1.3358	0.207344	0.700005	0.524033	1214.65	7.74961	1245.77	9.58698	1299.97	22.1106	1299.97	7.74961	93.437
08TC44-97	08TC44	PTr-K	378.82	32860	2.61661	11.6418	1.55193	2.55383	1.72803	0.215631	0.760001	0.439807	1258.75	8.69045	1287.53	12.6095	1335.85	30.0091	1335.85	8.69045	94.2283
08TC44-65	08TC44	PTr-K	603.105	27782	1.23273	11.538	1.53208	2.5821	2.18652	0.216074	1.56	0.713463	1261.1	17.8684	1295.58	16.005	1353.15	29.555	1353.15	17.8684	93.1969
08TC44-6	08TC44	PTr-K	153.063	22418	2.65596	11.2272	1.41097	2.91186	1.51804	0.237104	0.560001	0.368898	1371.62	6.91894	1385	11.4741	1405.64	27.0209	1405.64	6.91894	97.5799
08TC44-14	08TC44	PTr-K	98.1121	13732	1.45475	10.9931	1.85331	3.12899	1.95111	0.249473	0.610003	0.312643	1435.76	7.85138	1439.85	15.0143	1445.88	35.3002	1445.88	7.85138	99.2999
08TC44-98	08TC44	PTr-K	140.045	13654	0.619972	10.9136	0.724258	2.97295	3.09591	0.235317	3.01	0.972251	1362.31	36.9628	1400.73	23.5272	1459.69	13.7684	1459.69	36.9628	93.3285
08TC44-92	08TC44	PTr-K	377.067	37424	1.4967	10.8947	1.16086	3.10794	1.53873	0.245577	1.01	0.656385	1415.62	12.8368	1434.66	11.8212	1462.98	22.0591	1462.98	12.8368	96.7631
08TC44-23	08TC44	PTr-K	350.027	34642	1.27072	10.8674	1.80074	3.23045	2.05014	0.254617	0.98	0.478017	1462.24	12.821	1464.5	15.8974	1467.74	34.1979	1467.74	12.821	99.6252
08TC44-16	08TC44	PTr-K	175.247	20370	0.879286	10.7375	1.99174	3.37166	2.78739	0.26257	1.95	0.699581	1502.97	26.1423	1497.84	21.8319	1490.55	37.7089	1490.55	26.1423	100.833
08TC44-24	08TC44	PTr-K	193.085	37912	1.50857	10.4438	0.810779	3.51854	1.2188	0.266513	0.91	0.746639	1523.08	12.3444	1531.39	9.63692	1542.87	15.2434	1542.87	12.3444	98.7173
08TC44-96	08TC44	PTr-K	105.928	15434	1.11348	10.3324	0.792234	3.64291	1.26797	0.27299	0.990001	0.780779	1555.96	13.686	1558.96	10.1021	1563.01	14.8537	1563.01	13.686	99.5492
08TC44-32	08TC44	PTr-K	352.886	58108	5.78385	10.0634	1.34007	3.72691	1.74648	0.272016	1.12	0.641291	1551.03	15.4397	1577.17	13.9827	1612.29	24.9662	1612.29	15.4397	96.2001
08TC44-20	08TC44	PTr-K	90.5258	19474	1.54157	9.93434	1.28269	4.04423	1.84775	0.29139	1.33	0.719794	1648.47	19.3459	1643.14	15.0434	1636.31	23.823	1636.31	19.3459	100.743
08TC44-52	08TC44	PTr-K	183.81	24834	0.961657	9.88749	0.960884	3.89681	2.22787	0.279444	2.01	0.902208	1588.56	28.3003	1613.02	18.0037	1645.08	17.827	1645.08	28.3003	96.5641
08TC44-91	08TC44	PTr-K	126.669	25256	1.48442	9.82611	1.043	3.90229	1.7139	0.278099	1.36	0.793513	1581.78	19.0763	1614.16	13.8536	1656.63	19.3203	1656.63	19.0763	95.4819
08TC44-30	08TC44	PTr-K	162.725	28836	1.36006	9.74856	0.922257	3.95466	1.71845	0.279607	1.45	0.843786	1589.38	20.4249	1624.95	13.928	1671.29	17.0515	1671.29	20.4249	95.0992
08TC44-85	08TC44	PTr-K	188.976	23262	1.00244	9.74127	1.58063	4.02032	1.9967	0.284037	1.22	0.61101	1611.66	17.3971	1638.31	16.2371	1672.67	29.2213	1672.67	17.3971	96.3523
08TC44-61	08TC44	PTr-K	121.676	14072	1.46544	9.6015	1.43286	4.17083	1.52774	0.290443	0.530004	0.346919	1643.74	7.68987	1668.31	12.5131	1699.35	26.3996	1699.35	7.68987	96.7279
08TC44-75	08TC44	PTr-K	89.3404	13414	1.56986	9.53734	0.949264	4.28095	1.27421	0.296119	0.850005	0.667084	1672.04	12.5188	1689.71	10.4885	1711.69	17.4613	1711.69	12.5188	97.6836
08TC44-62	08TC44	PTr-K	88.3562	13708	0.820705	9.53565	1.22289	4.43499	1.32116	0.30672	0.500004	0.378457	1724.54	7.56573	1718.9	10.947	1712.01	22.4945	1712.01	7.56573	100.732
08TC44-34	08TC44	PTr-K	244.982	42834	2.66525	9.25082	0.75114	4.44766	1.69547	0.298408	1.52	0.896508	1683.41	22.5197	1721.26	14.0562	1767.6	13.7201	1767.6	22.5197	95.2371
08TC44-77	08TC44	PTr-K	300.816	21776	4.05793	8.96989	1.37349	4.78958	2.01181	0.31159	1.47	0.730687	1748.53	22.5125	1783.07	16.9008	1823.73	24.9175	1823.73	22.5125	95.8763
08TC44-55	08TC44	PTr-K	229.766	33768	0.571347	8.12918	2.1301	5.98734	2.58243	0.353004	1.46	0.565359	1948.93	24.5558	1974.01	22.4725	2000.37	37.8399	2000.37	24.5558	97.4282
08TC44-17	08TC44	PTr-K	71.8976	11922	1.17792	7.99336	1.69122	6.23763	1.7847	0.361616	0.570038	0.319402	1989.83	9.75921	2009.74	15.619	2030.25	29.9416	2030.25	9.75921	98.0088
08TC44-42	08TC44	PTr-K	106.948	31712	1.50812	5.99211	0.850573	10.9984	1.45461	0.477977	1.18	0.811217	2518.45	24.6004	2523	13.5396	2526.64	14.2822	2526.64	24.6004	99.6758
09-KK1-15	09-KK-1	PTr-K	1387.53	51340.6	0.942271	20.122	1.61016	0.196651	2.05744	0.0286989	1.28081	0.622524	182.4	2.30345	182.288	3.43311	180.82	37.5325	182.4	2.30345	NA	exclude	high U
09-KK1-66	09-KK-1	PTr-K	1050.8	92339.2	0.833194	19.0482	1.50334	0.347449	2.38564	0.0480002	1.85236	0.776463	302.232	5.46923	302.801	6.24625	307.158	34.2433	302.232	5.46923	NA	exclude	high U
09-KK1-80	09-KK-1	PTr-K	1193.16	5370.1	3.43967	17.7652	1.75299	0.509818	4.21705	0.0656876	3.83543	0.909506	410.123	15.2401	418.327	14.4597	463.843	38.8551	410.123	15.2401	NA	exclude	high U
09-KK1-63	09-KK-1	PTr-K	1635.27	13949.3	9.86848	15.9146	1.6936	0.57749	5.18584	0.0666561	4.90149	0.945169	415.978	19.7453	462.847	19.2787	702.678	36.032	415.978	19.7453	NA	exclude	high U
09-KK1-29	09-KK-1	PTr-K	1314.13	14444	0.792642	15.9518	1.13234	0.827988	5.40642	0.0957925	5.28651	0.977821	589.704	29.7916	612.495	24.8701	697.68	24.1019	589.704	29.7916	84.5236	exclude	high U
09-KK1-42	09-KK-1	PTr-K	255.746	29600.8	11.4063	18.4752	5.61066	0.396957	6.3144	0.05319	2.89691	0.458778	334.077	9.4314	339.438	18.2208	376.305	126.31	334.077	9.4314	NA	exclude	high U/Th
09-KK1-25	09-KK-1	PTr-K	776.354	29766.3	22.403	17.7881	2.69558	0.460676	3.74797	0.0594326	2.60406	0.694793	372.174	9.41719	384.728	12.0029	460.937	59.7694	372.174	9.41719	NA	exclude	high U/Th
09-KK1-89	09-KK-1	PTr-K	444.494	34197.2	11.5064	18.3563	1.40715	0.500233	2.33171	0.0665974	1.85924	0.797375	415.623	7.48361	411.86	7.89453	390.805	31.5805	415.623	7.48361	NA	exclude	high U/Th
09-KK1-12	09-KK-1	PTr-K	3809.95	906884	24.168	11.1494	0.231683	3.02494	3.05536	0.244607	3.04656	0.997121	1410.6	38.5984	1413.93	23.3198	1418.93	4.42866	1418.93	4.42866	99.4131	exclude	high U/Th
09-KK1-21	09-KK-1	PTr-K	280.62	113045	60.2228	5.18298	0.293493	14.1459	5.70439	0.531753	5.69683	0.998676	2748.83	127.506	2759.54	54.1484	2767.37	4.81637	2767.37	4.81637	99.3302	exclude	high U/Th
09-KK1-38	09-KK-1	PTr-K	922.109	631182	14.2165	5.11626	0.19887	12.5588	1.78225	0.466013	1.77112	0.993755	2466.05	36.2937	2647.14	16.7635	2788.6	3.25739	2788.6	3.25739	88.4333	exclude	high U/Th
09-KK1-67	09-KK-1	PTr-K	655.423	203661	8.0075	10.1948	1.82327	2.93108	9.87636	0.216724	9.7066	0.982812	1264.54	111.466	1389.97	74.9082	1588.09	34.0756	1588.09	34.0756	79.6265	exclude	low concordance
09-KK1-86	09-KK-1	PTr-K	239.502	20806.9	2.7353	20.7069	8.21639	0.200487	9.80298	0.0301093	5.34689	0.545435	191.232	10.0748	185.538	16.6248	113.643	194.144	191.232	10.0748	NA
09-KK1-98	09-KK-1	PTr-K	177.261	5930.58	1.98618	19.7722	19.8539	0.214227	20.2302	0.0307205	3.88362	0.191972	195.056	7.46177	197.094	36.2568	221.538	463.22	195.056	7.46177	NA
09-KK1-31	09-KK-1	PTr-K	173.862	10333.5	2.43859	18.8009	21.5729	0.265648	21.8666	0.0362229	3.57146	0.16333	229.378	8.04811	239.208	46.6347	336.861	493.874	229.378	8.04811	NA
09-KK1-69	09-KK-1	PTr-K	307.645	29792.2	1.91635	19.4552	6.84971	0.288396	7.59781	0.0406934	3.28757	0.4327	257.13	8.28694	257.296	17.2703	258.791	157.532	257.13	8.28694	NA
09-KK1-78	09-KK-1	PTr-K	214.032	7603.9	1.19528	18.0989	16.4572	0.315359	17.3571	0.0413956	5.51631	0.317813	261.478	14.1354	278.326	42.2784	422.416	369.503	261.478	14.1354	NA
09-KK1-40	09-KK-1	PTr-K	400.964	32484.7	2.0613	18.8728	4.11263	0.367757	5.03064	0.0503382	2.89718	0.575907	316.597	8.9508	317.99	13.7351	328.184	93.3578	316.597	8.9508	NA
09-KK1-26	09-KK-1	PTr-K	856.882	26340.2	1.50063	18.4923	1.37188	0.389887	7.52062	0.0522912	7.39444	0.983222	328.573	23.6874	334.287	21.4243	374.216	30.8592	328.573	23.6874	NA
09-KK1-94	09-KK-1	PTr-K	70.0383	8312.49	0.857376	19.4759	19.9033	0.385638	20.9108	0.0544723	6.41238	0.306654	341.92	21.354	331.178	59.1591	256.397	461.48	341.92	21.354	NA
09-KK1-97	09-KK-1	PTr-K	316.111	30307.2	1.35474	18.1483	3.17167	0.455416	3.93827	0.0599437	2.33462	0.592804	375.283	8.51129	381.065	12.5135	416.326	70.8782	375.283	8.51129	NA
09-KK1-93	09-KK-1	PTr-K	796.279	110754	8.03346	18.0019	2.31753	0.472845	3.68011	0.0617356	2.85871	0.776801	386.172	10.7154	393.152	11.997	434.397	51.6223	386.172	10.7154	NA
09-KK1-14	09-KK-1	PTr-K	239.429	20167.7	0.833105	17.5311	4.13057	0.494642	5.85774	0.0628927	4.15348	0.70906	393.193	15.8432	408.069	19.6865	493.132	91.1223	393.193	15.8432	NA
09-KK1-45	09-KK-1	PTr-K	807.735	34436.9	6.49761	17.7115	2.83595	0.492338	4.67722	0.0632438	3.71937	0.795211	395.323	14.2618	406.503	15.6692	470.543	62.7799	395.323	14.2618	NA
09-KK1-62	09-KK-1	PTr-K	190.796	27906.2	1.50903	17.6396	5.6465	0.498886	7.63136	0.0638248	5.13369	0.67271	398.844	19.855	410.948	25.7963	479.493	124.87	398.844	19.855	NA
09-KK1-87	09-KK-1	PTr-K	324.803	19617.4	4.19969	18.3855	3.61352	0.488728	4.20977	0.0651691	2.15978	0.513041	406.985	8.51829	404.044	14.0336	387.238	81.1768	406.985	8.51829	NA
09-KK1-100	09-KK-1	PTr-K	849.351	144556	4.49162	18.1023	1.03659	0.498176	2.89062	0.0654056	2.69836	0.933489	408.416	10.6787	410.467	9.76009	421.996	23.1381	408.416	10.6787	NA
09-KK1-44	09-KK-1	PTr-K	87.5894	12495.8	1.52183	17.4355	20.6544	0.519153	22.0972	0.0656491	7.85372	0.355418	409.89	31.1898	424.585	76.8224	505.155	458.858	409.89	31.1898	NA
09-KK1-58	09-KK-1	PTr-K	288.586	31972.8	2.29205	18.1007	3.82725	0.511369	4.31982	0.0671318	2.00323	0.463731	418.852	8.12382	419.37	14.8419	422.194	85.4702	418.852	8.12382	NA
09-KK1-96	09-KK-1	PTr-K	856.312	20176	0.764356	17.921	1.83153	0.519353	5.49281	0.0675032	5.17846	0.942771	421.096	21.1094	424.719	19.0669	444.412	40.7384	421.096	21.1094	NA
09-KK1-53	09-KK-1	PTr-K	330.183	67692.6	1.58271	17.8211	2.12779	0.540404	2.91233	0.0698477	1.98851	0.682791	435.238	8.36907	438.691	10.3746	456.828	47.2316	435.238	8.36907	NA
09-KK1-23	09-KK-1	PTr-K	146.689	13938	2.16217	17.6862	5.77535	0.545488	8.48895	0.0699712	6.22154	0.732899	435.982	26.228	442.037	30.4322	473.7	127.851	435.982	26.228	NA
09-KK1-17	09-KK-1	PTr-K	246.027	41953.7	3.05864	18.0268	6.24743	0.553709	6.56154	0.0723933	2.00583	0.305695	450.559	8.72883	447.423	23.748	431.315	139.339	450.559	8.72883	NA
09-KK1-5	09-KK-1	PTr-K	558.76	80713.5	1.95288	17.8878	1.97706	0.559232	4.3802	0.0725518	3.90862	0.89234	451.511	17.0441	451.026	15.9529	448.534	43.9478	451.511	17.0441	NA
09-KK1-19	09-KK-1	PTr-K	253.943	39945.3	3.1844	17.4231	3.87487	0.58984	4.66089	0.0745348	2.59024	0.555739	463.418	11.5824	470.765	17.5599	506.731	85.2589	463.418	11.5824	NA
09-KK1-56	09-KK-1	PTr-K	361.448	106861	1.16329	16.4465	2.37683	0.757957	3.2394	0.09041	2.20101	0.679448	557.961	11.7643	572.831	14.1827	632.303	51.2029	557.961	11.7643	88.2427
09-KK1-8	09-KK-1	PTr-K	320.593	46085.3	2.94508	16.8881	1.93421	0.752346	2.27917	0.0921502	1.20559	0.528962	568.241	6.55743	569.584	9.93616	574.957	42.0574	568.241	6.55743	98.832
09-KK1-95	09-KK-1	PTr-K	212.227	49895.5	1.97587	16.2222	1.69224	0.791931	3.34384	0.0931745	2.88402	0.862489	574.284	15.8462	592.266	15.0063	661.752	36.2856	574.284	15.8462	86.7823
09-KK1-48	09-KK-1	PTr-K	70.2688	12763.5	0.887361	15.9393	8.1481	0.816911	9.2657	0.094437	4.41153	0.476114	581.725	24.5392	606.323	42.3253	699.361	173.783	581.725	24.5392	83.1794
09-KK1-61	09-KK-1	PTr-K	431.618	69638.2	0.831438	16.5634	1.32229	0.799988	4.4278	0.096102	4.22575	0.954368	591.524	23.8839	596.822	19.9842	616.984	28.5678	591.524	23.8839	95.8735
09-KK1-68	09-KK-1	PTr-K	159.286	23000.7	0.67338	16.4488	4.20615	0.818549	4.76928	0.0976515	2.24819	0.471391	600.631	12.8934	607.239	21.8006	631.994	90.6099	600.631	12.8934	95.0375
09-KK1-51	09-KK-1	PTr-K	397.42	87540.1	1.39028	16.2805	1.47983	0.863673	2.11741	0.10198	1.51444	0.715232	626.001	9.03465	632.126	9.96388	654.09	31.7733	626.001	9.03465	95.7057
09-KK1-72	09-KK-1	PTr-K	442.66	105706	0.954964	16.353	1.80894	0.862624	2.92218	0.10231	2.29496	0.78536	627.931	13.7312	631.554	13.7423	644.569	38.8985	627.931	13.7312	97.4187
09-KK1-76	09-KK-1	PTr-K	219.353	36969.7	0.808791	16.4357	3.00871	0.874654	4.68934	0.104261	3.59688	0.767034	639.334	21.8926	638.091	22.2191	633.714	64.7766	639.334	21.8926	100.887
09-KK1-41	09-KK-1	PTr-K	366.583	92007.7	1.29682	15.2434	1.45813	1.17602	3.08346	0.130015	2.71691	0.881123	787.953	20.1514	789.456	16.9223	793.683	30.5925	787.953	20.1514	99.2781
09-KK1-75	09-KK-1	PTr-K	451.757	122645	1.11932	15.2227	1.46839	1.25085	3.44892	0.1381	3.12072	0.904839	833.91	24.4112	823.786	19.4637	796.537	30.7858	833.91	24.4112	104.692
09-KK1-2	09-KK-1	PTr-K	227.018	53618.1	1.62762	14.7498	1.68959	1.33298	3.36538	0.142596	2.91051	0.864838	859.327	23.4155	860.177	19.5267	862.35	35.0556	859.327	23.4155	99.6495
09-KK1-91	09-KK-1	PTr-K	489.751	97313.1	6.98606	14.1149	1.65697	1.4179	2.68208	0.145151	2.10903	0.786341	873.727	17.2329	896.479	15.9714	952.984	33.8862	952.984	33.8862	91.6832
09-KK1-46	09-KK-1	PTr-K	227.786	41552.8	3.21255	13.8722	2.02801	1.62538	4.46653	0.16353	3.97958	0.890978	976.366	36.0563	980.075	28.085	988.411	41.2627	988.411	41.2627	98.7814
09-KK1-35	09-KK-1	PTr-K	294.935	74211.1	4.4601	13.8651	1.17429	1.4466	4.31957	0.145469	4.15688	0.962338	875.513	34.0312	908.464	25.9388	989.415	23.8679	989.415	23.8679	88.488
09-KK1-28	09-KK-1	PTr-K	178.835	53816.2	0.882252	13.8393	2.67733	1.6672	7.82871	0.167341	7.35668	0.939704	997.446	67.9863	996.122	49.7279	993.193	54.4559	993.193	54.4559	100.428
09-KK1-7	09-KK-1	PTr-K	72.3647	17918.9	2.89177	13.7299	2.09633	1.62185	4.37592	0.161502	3.8411	0.877781	965.119	34.43	978.708	27.4921	1009.31	42.5257	1009.31	42.5257	95.6221
09-KK1-20	09-KK-1	PTr-K	289.886	81414.9	2.39806	13.7264	1.58252	1.52394	2.84443	0.151713	2.36356	0.830942	910.558	20.0708	940.062	17.4404	1009.83	32.0726	1009.83	32.0726	90.1697
09-KK1-4	09-KK-1	PTr-K	145.683	16582.9	3.21717	13.7195	2.82779	1.739	3.55814	0.173037	2.15962	0.606952	1028.82	20.5364	1023.09	22.9422	1010.84	57.3545	1010.84	57.3545	101.779
09-KK1-59	09-KK-1	PTr-K	500.775	132928	9.22312	13.6914	0.938634	1.76298	4.18293	0.175063	4.07626	0.974498	1039.94	39.1487	1031.94	27.1071	1015	19.0052	1015	19.0052	102.457
09-KK1-30	09-KK-1	PTr-K	462.304	22340.7	5.6506	13.6027	1.65065	1.52297	5.64634	0.150251	5.39967	0.956315	902.369	45.4692	939.674	34.6214	1028.16	33.3981	1028.16	33.3981	87.7657
09-KK1-49	09-KK-1	PTr-K	203.561	146634	2.7266	13.5587	1.95949	1.71505	2.98052	0.168653	2.24586	0.753512	1004.68	20.8934	1014.17	19.1193	1034.71	39.5882	1034.71	39.5882	97.0981
09-KK1-84	09-KK-1	PTr-K	574.34	199798	7.46193	13.5369	0.626938	1.77725	2.01125	0.174489	1.91104	0.950175	1036.8	18.3024	1037.18	13.0693	1037.95	12.678	1037.95	12.678	99.8885
09-KK1-11	09-KK-1	PTr-K	183.776	35074.1	1.76242	13.4789	2.84314	1.76208	3.90531	0.172258	2.67732	0.685559	1024.54	25.3616	1031.61	25.3026	1046.66	57.3427	1046.66	57.3427	97.8863
09-KK1-83	09-KK-1	PTr-K	159.161	65118	1.93667	13.4295	1.21849	1.7666	3.3004	0.172067	3.06723	0.929352	1023.49	29.0277	1033.27	21.4019	1054.06	24.5638	1054.06	24.5638	97.0996
09-KK1-9	09-KK-1	PTr-K	184.082	32314.7	0.95167	13.0893	4.40279	1.92138	7.33209	0.182401	5.86302	0.799638	1080.08	58.3059	1088.55	49.0026	1105.55	88.0526	1105.55	88.0526	97.6955
09-KK1-37	09-KK-1	PTr-K	42.7817	13508.4	1.11	12.8923	5.69856	1.79506	6.26324	0.167845	2.59896	0.414954	1000.23	24.0793	1043.66	40.865	1135.75	113.496	1135.75	113.496	88.068
09-KK1-80	09-KK-1	PTr-K	290.946	153594	2.20754	12.8207	1.57431	1.93253	2.00434	0.179696	1.24054	0.618926	1065.31	12.1814	1092.42	13.4125	1146.82	31.2784	1146.82	31.2784	92.8928
09-KK1-39	09-KK-1	PTr-K	129.445	51440.1	2.36001	12.5583	2.48111	2.20737	3.19674	0.20105	2.01575	0.630564	1180.96	21.752	1183.38	22.3426	1187.83	49.0125	1187.83	49.0125	99.4216
09-KK1-77	09-KK-1	PTr-K	269.912	20047.2	3.42225	12.3451	2.3253	2.26591	4.05337	0.202879	3.32005	0.819085	1190.77	36.098	1201.75	28.5627	1221.55	45.7025	1221.55	45.7025	97.48
09-KK1-90	09-KK-1	PTr-K	87.1981	46098.8	2.291	12.1049	1.92621	2.5754	4.56284	0.226103	4.13633	0.906525	1314.04	49.1723	1293.68	33.3843	1260.05	37.6493	1260.05	37.6493	104.284
09-KK1-99	09-KK-1	PTr-K	194.922	54820.2	2.44472	11.8365	1.79855	2.72263	6.78161	0.233728	6.53877	0.964191	1354.01	79.8597	1334.65	50.4032	1303.72	34.9272	1303.72	34.9272	103.858
09-KK1-73	09-KK-1	PTr-K	264.409	79568.9	2.35686	11.8038	1.3116	2.37975	2.94659	0.203728	2.63858	0.895468	1195.32	28.7881	1236.54	21.0697	1309.09	25.4583	1309.09	25.4583	91.3091
09-KK1-24	09-KK-1	PTr-K	242.441	94526.1	2.4268	11.4078	1.42125	2.76705	1.91834	0.228937	1.28843	0.671639	1328.93	15.4727	1346.69	14.3087	1375.02	27.3331	1375.02	27.3331	96.6481
09-KK1-65	09-KK-1	PTr-K	436.474	135303	2.73262	11.3861	0.611391	2.84134	1.48794	0.234638	1.35653	0.911681	1358.76	16.619	1366.52	11.1756	1378.67	11.7526	1378.67	11.7526	98.5561
09-KK1-22	09-KK-1	PTr-K	331.665	135093	2.26376	11.3617	0.937567	2.87708	4.36051	0.237079	4.25852	0.976611	1371.49	52.6116	1375.93	32.8674	1382.8	18.0119	1382.8	18.0119	99.1821
09-KK1-70	09-KK-1	PTr-K	135.997	36186	3.13051	11.1108	1.50712	2.70581	7.03099	0.218043	6.86756	0.976756	1271.53	79.2542	1330.05	52.1726	1425.56	28.7845	1425.56	28.7845	89.195
09-KK1-85	09-KK-1	PTr-K	108.416	26795.7	1.10411	10.8353	1.40614	3.21987	2.12333	0.253034	1.59101	0.749297	1454.1	20.7113	1461.95	16.4523	1473.36	26.6832	1473.36	26.6832	98.6932
09-KK1-74	09-KK-1	PTr-K	578.615	127758	2.76489	10.7349	3.54552	3.20897	6.34279	0.24984	5.2593	0.829178	1437.65	67.775	1459.33	49.1404	1491.01	67.1376	1491.01	67.1376	96.4211
09-KK1-34	09-KK-1	PTr-K	653.901	222875	3.49217	10.6885	0.291952	3.00159	3.66255	0.232684	3.65089	0.996818	1348.55	44.4262	1408.02	27.9024	1499.2	5.52076	1499.2	5.52076	89.9512
09-KK1-33	09-KK-1	PTr-K	874.955	121624	2.80198	10.6592	0.636165	2.75432	6.50842	0.212931	6.47725	0.995211	1244.42	73.3045	1343.26	48.5198	1504.38	12.0215	1504.38	12.0215	82.7193
09-KK1-36	09-KK-1	PTr-K	204.738	64191	2.81215	10.3533	1.01533	2.89141	2.32784	0.217114	2.09474	0.899864	1266.61	24.0883	1379.67	17.5642	1559.2	19.0468	1559.2	19.0468	81.2344
09-KK1-79	09-KK-1	PTr-K	663.973	268524	4.54953	9.70326	0.52779	3.70081	4.61357	0.260443	4.58328	0.993435	1492.11	61.0516	1571.54	36.8962	1679.9	9.74841	1679.9	9.74841	88.8213
09-KK1-10	09-KK-1	PTr-K	371.79	71846.3	0.755579	9.65842	0.899811	4.1369	2.14719	0.289787	1.94955	0.907956	1640.47	28.2369	1661.62	17.5597	1688.45	16.6001	1688.45	16.6001	97.1582
09-KK1-32	09-KK-1	PTr-K	196.89	180507	2.71379	9.60525	1.06731	4.38205	5.5386	0.30527	5.43479	0.981257	1717.39	81.9425	1708.96	45.8199	1698.63	19.6655	1698.63	19.6655	101.105
09-KK1-88	09-KK-1	PTr-K	133.691	131778	3.23408	8.78756	0.865372	4.88082	2.98762	0.311071	2.85955	0.957132	1745.98	43.7377	1798.95	25.1825	1860.9	15.6276	1860.9	15.6276	93.8242
09-KK1-50	09-KK-1	PTr-K	67.6778	72902.1	0.61301	8.59085	0.925907	5.3697	1.86457	0.334569	1.61843	0.867992	1860.49	26.1553	1880.04	15.9616	1901.69	16.6393	1901.69	16.6393	97.8336
09-KK1-6	09-KK-1	PTr-K	141.561	160266	1.27161	8.24897	0.65931	6.02458	4.39082	0.360434	4.34104	0.988662	1984.23	74.1445	1979.4	38.2549	1974.35	11.7464	1974.35	11.7464	100.5
09-KK1-52	09-KK-1	PTr-K	211.513	85421	3.25518	7.67711	0.849407	6.75764	5.60587	0.376263	5.54114	0.988454	2058.8	97.6654	2080.19	49.6231	2101.42	14.9148	2101.42	14.9148	97.9719
09-KK1-1	09-KK-1	PTr-K	183.864	142657	4.91106	7.58714	0.669899	7.30657	2.15989	0.402059	2.05338	0.950686	2178.51	37.9591	2149.61	19.2932	2122.1	11.7351	2122.1	11.7351	102.659
09-KK1-43	09-KK-1	PTr-K	39.9877	26234.7	2.7108	7.33632	1.14637	7.64352	2.49095	0.406696	2.21148	0.887808	2199.8	41.2171	2189.99	22.3701	2180.8	19.9534	2180.8	19.9534	100.871
09-KK1-16	09-KK-1	PTr-K	129.261	45518.9	0.471149	6.53749	1.17916	7.41741	4.64275	0.351691	4.49052	0.96721	1942.67	75.3214	2163.07	41.5644	2379.32	20.0941	2379.32	20.0941	81.6483
09-KK1-54	09-KK-1	PTr-K	115.881	184593	1.19164	4.15687	0.618034	20.4087	1.85832	0.615291	1.75254	0.943076	3091.15	43.035	3110.93	17.9896	3123.7	9.83464	3123.7	9.83464	98.9579
09-KK3-22	09-KK-3	pre-Mz	602.234	147892	12.1892	16.405	2.30143	0.912509	4.85851	0.108571	4.27885	0.880691	664.441	27.0145	658.391	23.5421	637.741	49.5303	664.441	27.0145	104.187	exclude	high U/Th
09-KK3-85	09-KK-3	pre-Mz	299.104	123415	41.4141	9.58457	0.769702	4.06541	3.32838	0.282602	3.23816	0.972893	1604.46	45.9947	1647.39	27.1304	1702.6	14.1741	1702.6	14.1741	94.2358	exclude	high U/Th
09-KK3-66	09-KK-3	pre-Mz	251.323	193716	176.133	8.80851	0.7831	5.08746	2.70506	0.325014	2.58923	0.95718	1814.17	40.9427	1834.02	22.9586	1856.6	14.149	1856.6	14.149	97.7147	exclude	high U/Th
09-KK3-59	09-KK-3	pre-Mz	36.2248	49820.3	10.1917	5.45691	2.13227	12.1918	3.23717	0.482519	2.43571	0.75242	2538.23	51.1054	2619.28	30.387	2682.53	35.2698	2682.53	35.2698	94.6207	exclude	high U/Th
09-KK3-74	09-KK-3	pre-Mz	153.644	54434.2	2.27849	16.0642	3.04005	0.85652	4.44087	0.0997921	3.23719	0.728954	613.191	18.9353	628.222	20.8064	682.692	64.9356	613.191	18.9353	89.8195
09-KK3-58	09-KK-3	pre-Mz	164.156	29568	2.06879	16.5677	5.44295	0.846425	5.91646	0.101707	2.31922	0.391994	624.404	13.8021	622.685	27.5458	616.422	117.6	624.404	13.8021	101.295
09-KK3-78	09-KK-3	pre-Mz	429.754	84677.9	8.21116	16.1499	1.4982	0.886387	2.83196	0.103822	2.4032	0.8486	636.771	14.5714	644.426	13.5125	671.327	32.0495	636.771	14.5714	94.8525
09-KK3-100	09-KK-3	pre-Mz	457.825	183319	3.19522	16.2104	1.68133	0.902581	4.87066	0.106115	4.57127	0.938531	650.148	28.2707	653.106	23.466	663.319	36.0232	650.148	28.2707	98.0145
09-KK3-21	09-KK-3	pre-Mz	309.295	88843	1.98705	16.4115	2.23082	0.902763	2.97156	0.107453	1.96306	0.660617	657.941	12.2786	653.203	14.3164	636.892	48.0282	657.941	12.2786	103.305
09-KK3-63	09-KK-3	pre-Mz	286.223	110811	3.91038	16.0304	1.38127	0.925563	2.31078	0.107609	1.85251	0.801681	658.846	11.6022	665.297	11.2786	687.197	29.4661	658.846	11.6022	95.8743
09-KK3-75	09-KK-3	pre-Mz	297.447	44977.7	4.45591	16.1972	1.67758	0.926869	2.72018	0.108882	2.14129	0.787185	666.254	13.554	665.986	13.2868	665.099	35.9525	666.254	13.554	100.174
09-KK3-14	09-KK-3	pre-Mz	165.373	38895.6	1.74696	16.4066	3.20435	0.918189	3.77304	0.109257	1.99198	0.52795	668.433	12.648	661.402	18.3404	637.523	68.9514	668.433	12.648	104.848
09-KK3-19	09-KK-3	pre-Mz	43.4588	8923.08	3.21525	15.8081	9.07423	0.976638	11.0555	0.111973	6.31519	0.571228	684.194	40.9947	691.879	55.5195	716.919	193.065	684.194	40.9947	95.4354
09-KK3-39	09-KK-3	pre-Mz	128.258	26931.6	1.16358	15.8211	7.27267	0.980421	8.18997	0.112499	3.76616	0.45985	687.245	24.551	693.821	41.1913	715.193	154.675	687.245	24.551	96.0921
09-KK3-73	09-KK-3	pre-Mz	297.059	39233.1	7.59563	16.0525	2.73478	0.968546	4.28021	0.112761	3.29259	0.76926	688.765	21.5088	687.714	21.3862	684.297	58.3974	688.765	21.5088	100.653
09-KK3-56	09-KK-3	pre-Mz	68.0958	15807	2.25851	15.7839	7.87792	1.04636	8.46763	0.119783	3.10469	0.366654	729.313	21.4091	727.077	43.9908	720.169	167.434	729.313	21.4091	101.27
09-KK3-83	09-KK-3	pre-Mz	123.707	42641.9	3.27327	12.8002	2.72763	2.01823	3.36196	0.187364	1.96542	0.584603	1107.08	19.993	1121.67	22.8305	1150.04	54.1679	1150.04	54.1679	96.2647
09-KK3-57	09-KK-3	pre-Mz	134.415	41016.7	2.18938	11.4803	1.42859	2.59332	1.89947	0.215927	1.25185	0.659049	1260.32	14.3308	1298.75	13.9204	1362.82	27.5213	1362.82	27.5213	92.479
09-KK3-77	09-KK-3	pre-Mz	301.161	477021	1.39309	11.4279	0.919761	2.70482	2.99473	0.224184	2.84999	0.951669	1303.95	33.6453	1329.78	22.2038	1371.62	17.6968	1371.62	17.6968	95.0664
09-KK3-23	09-KK-3	pre-Mz	289.46	124393	2.52196	11.1631	1.25325	2.90673	4.20651	0.235336	4.01548	0.954587	1362.41	49.3137	1383.66	31.7896	1416.59	23.9646	1416.59	23.9646	96.1753
09-KK3-84	09-KK-3	pre-Mz	120.87	103740	3.17442	11.1492	1.80002	2.91099	2.57076	0.235388	1.83541	0.713955	1362.68	22.5441	1384.77	19.4311	1418.97	34.4102	1418.97	34.4102	96.033
09-KK3-64	09-KK-3	pre-Mz	116.865	101933	2.87388	11.1383	1.2316	2.88391	2.76981	0.232969	2.48093	0.895704	1350.04	30.2191	1377.71	20.8859	1420.85	23.537	1420.85	23.537	95.0166
09-KK3-17	09-KK-3	pre-Mz	261.944	142616	2.56672	11.0707	0.730038	3.18314	1.94658	0.255581	1.8045	0.92701	1467.19	23.6789	1453.08	15.0414	1432.47	13.9294	1432.47	13.9294	102.424
09-KK3-34	09-KK-3	pre-Mz	229.423	105987	3.79572	11.0705	1.53227	3.08556	2.41208	0.247743	1.86287	0.772308	1426.83	23.844	1429.11	18.4992	1432.5	29.2374	1432.5	29.2374	99.604
09-KK3-2	09-KK-3	pre-Mz	74.5741	61561.5	2.2969	11.0632	1.36373	3.1071	4.99249	0.249306	4.80262	0.96197	1434.9	61.7837	1434.45	38.3684	1433.77	26.0167	1433.77	26.0167	100.079
09-KK3-6	09-KK-3	pre-Mz	138.854	37222.2	3.24544	10.9761	1.60882	3.17929	2.42847	0.253091	1.81911	0.749076	1454.4	23.685	1452.14	18.7603	1448.82	30.6307	1448.82	30.6307	100.385
09-KK3-52	09-KK-3	pre-Mz	69.8672	122607	2.11487	10.9015	3.23631	3.19315	3.88478	0.252466	2.14891	0.553163	1451.18	27.924	1455.5	30.0471	1461.8	61.5193	1461.8	61.5193	99.2735
09-KK3-8	09-KK-3	pre-Mz	310.624	54655.3	2.52571	10.7872	0.787578	2.86915	6.07738	0.224472	6.02613	0.991567	1305.46	71.2176	1373.85	45.7908	1481.8	14.9278	1481.8	14.9278	88.0999
09-KK3-61	09-KK-3	pre-Mz	87.5045	36551.8	3.0919	10.7654	1.56897	3.04631	2.70863	0.23785	2.20794	0.815151	1375.51	27.3491	1419.31	20.7088	1485.63	29.7244	1485.63	29.7244	92.5879
09-KK3-40	09-KK-3	pre-Mz	84.6672	12150.1	3.28113	10.6226	3.43155	3.23255	3.88562	0.249044	1.82278	0.469109	1433.54	23.4289	1465	30.1412	1510.88	64.8048	1510.88	64.8048	94.8816
09-KK3-28	09-KK-3	pre-Mz	34.5469	19751.6	0.866318	10.4736	4.91571	3.72108	5.3614	0.282661	2.14019	0.399186	1604.75	30.4038	1575.91	42.9333	1537.5	92.5349	1537.5	92.5349	104.374
09-KK3-65	09-KK-3	pre-Mz	101.866	32319.4	3.49026	9.85549	1.90268	4.00539	5.6254	0.2863	5.29385	0.941063	1623.01	75.9608	1635.29	45.7387	1651.1	35.272	1651.1	35.272	98.2992
09-KK3-18	09-KK-3	pre-Mz	51.8997	43568.4	2.05224	9.75061	2.62119	4.19093	6.84208	0.296375	6.32008	0.923707	1673.31	93.1497	1672.25	56.1469	1670.9	48.4741	1670.9	48.4741	100.144
09-KK3-49	09-KK-3	pre-Mz	159.764	64876.6	1.37411	9.69016	1.05869	4.0175	3.96288	0.282349	3.81884	0.963654	1603.18	54.2051	1637.74	32.2296	1682.39	19.5468	1682.39	19.5468	95.2917
09-KK3-20	09-KK-3	pre-Mz	132.942	95079.2	2.98151	9.68264	1.07937	4.27478	4.19975	0.300197	4.05868	0.966409	1692.28	60.4105	1688.52	34.5725	1683.83	19.9249	1683.83	19.9249	100.502
09-KK3-5	09-KK-3	pre-Mz	325.051	60913.8	4.36618	9.62745	0.752182	3.45327	8.94496	0.241124	8.91328	0.996458	1392.54	111.641	1516.62	70.5437	1694.37	13.8658	1694.37	13.8658	82.1861
09-KK3-10	09-KK-3	pre-Mz	133.851	71786.5	2.74375	9.62737	1.32423	4.26822	3.20452	0.298025	2.91811	0.910623	1681.51	43.1913	1687.25	26.3678	1694.39	24.4131	1694.39	24.4131	99.24
09-KK3-15	09-KK-3	pre-Mz	238.742	142476	2.62347	9.62522	0.633648	4.29238	5.0679	0.299645	5.02813	0.992153	1689.55	74.7354	1691.9	41.7589	1694.8	11.6798	1694.8	11.6798	99.6902
09-KK3-31	09-KK-3	pre-Mz	58.3282	33409.7	3.70882	9.6251	2.64085	4.19159	2.83935	0.292606	1.04298	0.367332	1654.54	15.2199	1672.38	23.2811	1694.82	48.6879	1694.82	48.6879	97.6231
09-KK3-4	09-KK-3	pre-Mz	97.4526	77512.7	3.60471	9.62426	1.28645	4.29956	3.13712	0.300117	2.86122	0.912053	1691.89	42.5779	1693.28	25.8487	1694.98	23.7146	1694.98	23.7146	99.8175
09-KK3-69	09-KK-3	pre-Mz	274.539	101720	4.20624	9.57859	0.788721	3.51821	3.15358	0.244412	3.05336	0.968219	1409.59	38.6598	1531.32	24.9389	1703.74	14.5223	1703.74	14.5223	82.7351
09-KK3-99	09-KK-3	pre-Mz	122.107	54592.3	5.39271	9.57665	0.887161	4.4966	2.25014	0.312318	2.06787	0.918995	1752.1	31.7251	1730.34	18.693	1704.12	16.3344	1704.12	16.3344	102.816
09-KK3-62	09-KK-3	pre-Mz	464.795	293816	9.35159	9.55978	0.281756	4.10588	2.34359	0.284677	2.32659	0.992747	1614.87	33.2353	1655.47	19.1381	1707.36	5.1843	1707.36	5.1843	94.5831
09-KK3-47	09-KK-3	pre-Mz	77.6674	46527.9	1.33925	9.55659	1.60999	4.33994	2.78679	0.300805	2.27467	0.816233	1695.3	33.9089	1700.98	23.0015	1707.98	29.6314	1707.98	29.6314	99.2579
09-KK3-94	09-KK-3	pre-Mz	179.909	164802	4.28067	9.53795	0.92686	4.51739	1.50049	0.312494	1.18	0.78641	1752.97	18.1111	1734.18	12.4749	1711.57	17.0494	1711.57	17.0494	102.419
09-KK3-72	09-KK-3	pre-Mz	202.754	109813	1.96439	9.53018	0.472626	4.3121	3.43157	0.29805	3.39887	0.99047	1681.63	50.3105	1695.68	28.2916	1713.07	8.69299	1713.07	8.69299	98.1648
09-KK3-29	09-KK-3	pre-Mz	116.136	118905	3.44528	9.52497	1.34239	4.54574	2.09766	0.314027	1.61188	0.768421	1760.49	24.8323	1739.38	17.4603	1714.07	24.6864	1714.07	24.6864	102.708
09-KK3-37	09-KK-3	pre-Mz	306.417	126385	3.05163	9.52393	0.842188	4.52858	6.96031	0.312808	6.90917	0.992653	1754.51	106.135	1736.24	57.9533	1714.27	15.4864	1714.27	15.4864	102.347
09-KK3-70	09-KK-3	pre-Mz	182.88	129529	3.66203	9.49753	0.596867	4.23275	1.86292	0.291562	1.76472	0.947285	1649.33	25.681	1680.39	15.3021	1719.38	10.9695	1719.38	10.9695	95.9261
09-KK3-45	09-KK-3	pre-Mz	119.137	95492	3.39364	9.49414	1.15524	4.42361	1.94538	0.304601	1.56522	0.804583	1714.08	23.5585	1716.77	16.1123	1720.03	21.2285	1720.03	21.2285	99.6542
09-KK3-89	09-KK-3	pre-Mz	235.782	147186	5.40181	9.47871	0.48007	4.25386	1.89881	0.292436	1.83712	0.967512	1653.69	26.7967	1684.48	15.6117	1723.02	8.81882	1723.02	8.81882	95.9764
09-KK3-13	09-KK-3	pre-Mz	210.05	185773	8.36499	9.45722	0.634807	4.48963	2.12026	0.307945	2.023	0.954127	1730.59	30.7044	1729.06	17.6088	1727.19	11.6553	1727.19	11.6553	100.197
09-KK3-90	09-KK-3	pre-Mz	126.771	92617.9	2.92381	9.44678	1.71417	3.99337	2.64569	0.273604	2.01526	0.761716	1559.07	27.9088	1632.85	21.4872	1729.22	31.4634	1729.22	31.4634	90.1604
09-KK3-81	09-KK-3	pre-Mz	242.506	147161	3.59434	9.44346	0.402147	4.17602	6.22425	0.286017	6.21125	0.997911	1621.6	89.0574	1669.33	51.0328	1729.86	7.38102	1729.86	7.38102	93.7413
09-KK3-30	09-KK-3	pre-Mz	153.746	89029.5	2.45289	9.43637	1.06965	4.44465	1.9804	0.304188	1.66668	0.841588	1712.04	25.0596	1720.7	16.4168	1731.24	19.6278	1731.24	19.6278	98.8909
09-KK3-50	09-KK-3	pre-Mz	235.849	205990	3.45858	9.42216	0.534264	4.33225	1.92596	0.296048	1.85038	0.960754	1671.68	27.2472	1699.52	15.8897	1734.01	9.79907	1734.01	9.79907	96.4058
09-KK3-79	09-KK-3	pre-Mz	135.032	58725.4	3.04405	9.36238	0.922754	4.59276	2.15493	0.31186	1.94736	0.903681	1749.85	29.8428	1747.96	17.9703	1745.67	16.9014	1745.67	16.9014	100.239
09-KK3-16	09-KK-3	pre-Mz	127.672	73321.8	2.72952	9.27792	1.24625	4.83075	2.20881	0.325061	1.82365	0.825626	1814.4	28.8398	1790.27	18.5835	1762.25	22.7788	1762.25	22.7788	102.959
09-KK3-98	09-KK-3	pre-Mz	139.677	93561.2	0.710464	9.27701	0.838541	4.79132	2.56144	0.322376	2.4203	0.944896	1801.32	38.0364	1783.38	21.5207	1762.43	15.3285	1762.43	15.3285	102.206
09-KK3-82	09-KK-3	pre-Mz	175.668	129600	3.4369	9.24624	0.730188	4.55295	1.52614	0.305321	1.34012	0.878112	1717.64	20.2071	1740.7	12.7062	1768.5	13.3359	1768.5	13.3359	97.124
09-KK3-11	09-KK-3	pre-Mz	80.426	48341.6	1.56973	9.2235	0.970076	4.21036	2.26396	0.281652	2.0456	0.903548	1599.68	28.9791	1676.04	18.578	1773	17.708	1773	17.708	90.2244
09-KK3-96	09-KK-3	pre-Mz	209.113	245722	2.84018	9.21672	0.779136	4.77361	1.82977	0.319097	1.6556	0.904813	1785.32	25.818	1780.27	15.3624	1774.34	14.2197	1774.34	14.2197	100.619
09-KK3-67	09-KK-3	pre-Mz	309.808	111693	3.72316	9.21271	0.511881	4.34657	1.78901	0.290424	1.71422	0.958192	1643.65	24.8706	1702.24	14.7688	1775.14	9.34051	1775.14	9.34051	92.5928
09-KK3-92	09-KK-3	pre-Mz	159.752	118327	3.39411	9.20752	0.837841	4.79477	2.06762	0.320191	1.89026	0.914219	1790.66	29.5538	1783.98	17.373	1776.17	15.2878	1776.17	15.2878	100.816
09-KK3-54	09-KK-3	pre-Mz	295.281	403158	2.72522	9.16275	0.942343	4.44377	2.83766	0.295309	2.67662	0.94325	1668	39.3381	1720.54	23.5245	1785.05	17.1761	1785.05	17.1761	93.4429
09-KK3-3	09-KK-3	pre-Mz	251.355	184039	4.51032	9.15383	0.688116	4.79428	2.82271	0.318292	2.73755	0.969831	1781.38	42.6089	1783.9	23.7191	1786.83	12.539	1786.83	12.539	99.6953
09-KK3-71	09-KK-3	pre-Mz	14.8764	7204.58	7.88519	9.15321	3.882	4.31129	5.93452	0.286207	4.48873	0.756375	1622.55	64.391	1695.52	48.9507	1786.95	70.7666	1786.95	70.7666	90.7997
09-KK3-51	09-KK-3	pre-Mz	38.177	22613.4	3.48294	9.01026	3.84288	4.67894	4.91965	0.305762	3.07168	0.624371	1719.82	46.3684	1763.48	41.1796	1815.58	69.8089	1815.58	69.8089	94.7254
09-KK3-33	09-KK-3	pre-Mz	142.174	94702	3.72288	8.99392	0.699993	5.02151	1.6779	0.327553	1.52492	0.908822	1826.51	24.2547	1822.96	14.2087	1818.88	12.7053	1818.88	12.7053	100.42
09-KK3-76	09-KK-3	pre-Mz	41.1847	39837.7	1.34569	8.92721	2.31074	4.87242	2.61072	0.315471	1.21504	0.465404	1767.57	18.784	1797.5	21.9981	1832.38	41.88	1832.38	41.88	96.4631
09-KK3-35	09-KK-3	pre-Mz	98.9912	94809.5	2.73645	8.90165	1.48196	4.97569	3.0493	0.321235	2.66497	0.873959	1795.76	41.7694	1815.2	25.7863	1837.58	26.8387	1837.58	26.8387	97.7243
09-KK3-97	09-KK-3	pre-Mz	93.2774	89690.2	2.71426	8.88871	1.07569	5.17499	2.24827	0.333616	1.97424	0.878113	1855.88	31.8373	1848.51	19.1339	1840.21	19.4751	1840.21	19.4751	100.852
09-KK3-80	09-KK-3	pre-Mz	132.746	75684.2	4.7462	8.87034	1.20869	4.95093	1.83307	0.318512	1.37812	0.751808	1782.46	21.4609	1810.98	15.4862	1843.95	21.8735	1843.95	21.8735	96.6651
09-KK3-32	09-KK-3	pre-Mz	278.961	83290	2.62985	8.81481	0.836878	4.75477	2.77725	0.303977	2.64816	0.953519	1711	39.796	1776.95	23.3036	1855.31	15.1231	1855.31	15.1231	92.222
09-KK3-91	09-KK-3	pre-Mz	44.2201	55608.6	2.33526	8.81197	3.32941	5.35876	3.89803	0.342481	2.02724	0.520067	1898.59	33.3392	1878.29	33.3675	1855.89	60.1792	1855.89	60.1792	102.301
09-KK3-86	09-KK-3	pre-Mz	99.9552	66017.6	1.19343	8.76765	1.58904	4.96563	2.18381	0.31576	1.49799	0.685952	1768.99	23.1744	1813.49	18.4591	1865	28.6829	1865	28.6829	94.852
09-KK3-1	09-KK-3	pre-Mz	286.939	295807	2.50405	6.82349	0.377712	8.62679	3.14506	0.426928	3.1223	0.992762	2291.85	60.2224	2299.39	28.6248	2306.07	6.48425	2306.07	6.48425	99.3836
09-KK3-9	09-KK-3	pre-Mz	52.3511	46697.6	2.66364	6.76845	1.95243	8.43115	2.90793	0.413881	2.15501	0.741081	2232.64	40.6665	2278.54	26.4018	2319.97	33.4796	2319.97	33.4796	96.2358
09-KK3-55	09-KK-3	pre-Mz	68.8424	64210.4	2.20604	6.07987	0.611151	10.1809	2.58723	0.448932	2.51401	0.9717	2390.5	50.2141	2451.35	23.9251	2502.2	10.2837	2502.2	10.2837	95.5359
09-KK3-41	09-KK-3	pre-Mz	39.3141	32880.2	0.972582	5.97918	1.4	10.8019	2.91349	0.468426	2.55507	0.876982	2476.65	52.5436	2506.23	27.0828	2530.27	23.494	2530.27	23.494	97.8811
09-KK3-87	09-KK-3	pre-Mz	72.0815	41972.2	3.1568	5.89163	0.718267	10.4721	1.79754	0.447476	1.6478	0.916697	2384.02	32.8386	2477.45	16.6624	2554.99	12.0239	2554.99	12.0239	93.3084
09-KK3-26	09-KK-3	pre-Mz	121.768	62511.5	2.46791	5.8734	0.619707	10.7714	3.87209	0.45884	3.82218	0.98711	2434.44	77.5004	2503.6	35.9916	2560.18	10.3684	2560.18	10.3684	95.0886
09-KK3-46	09-KK-3	pre-Mz	154.248	217118	1.06688	5.83443	0.469162	11.588	0.957228	0.49035	0.834369	0.871652	2572.19	17.6968	2571.71	8.94764	2571.31	7.84325	2571.31	7.84325	100.034
09-KK3-7	09-KK-3	pre-Mz	41.963	33924.2	0.600107	5.78102	1.2765	11.6407	2.42436	0.48807	2.06109	0.850156	2562.32	43.5792	2575.95	22.6729	2586.67	21.3058	2586.67	21.3058	99.0584
09-KK3-68	09-KK-3	pre-Mz	16.4329	11672.1	1.38306	5.63469	2.48734	11.7114	3.86382	0.478606	2.95673	0.765234	2521.19	61.6976	2581.61	36.1614	2629.38	41.3504	2629.38	41.3504	95.8856
09-KK3-12	09-KK-3	pre-Mz	77.521	47349.8	1.49693	5.54685	0.4942	11.4193	2.36892	0.459393	2.31679	0.977997	2436.88	47.0138	2558.01	22.1203	2655.46	8.19536	2655.46	8.19536	91.7687
09-KK3-44	09-KK-3	pre-Mz	32.5033	33486.2	0.89636	5.48183	1.81513	13.1209	3.4315	0.521659	2.91213	0.848646	2706.21	64.3595	2688.38	32.3864	2674.99	30.0438	2674.99	30.0438	101.167
09-KK3-38	09-KK-3	pre-Mz	91.5012	187087	2.96261	4.69369	0.631893	16.9425	3.24904	0.576753	3.187	0.980905	2935.49	75.1531	2931.59	31.1613	2928.9	10.2174	2928.9	10.2174	100.225
09-KK3-53	09-KK-3	pre-Mz	60.2273	157123	3.18035	4.64231	1.38344	15.7781	2.56348	0.531235	2.15813	0.841874	2746.66	48.2668	2863.46	24.4825	2946.68	22.3412	2946.68	22.3412	93.2118
09-KK4-98	09-KK-4	PTr-K	1307.92	221504	1.6966	20.0899	2.0659	0.202882	6.96626	0.0295611	6.65288	0.955015	187.801	12.3139	187.562	11.9308	184.539	48.1159	187.801	12.3139	NA	exclude	high U
09-KK4-64	09-KK-4	PTr-K	1896.67	111148	0.739796	20.4257	1.73071	0.205806	2.08169	0.0304883	1.15676	0.555682	193.604	2.20623	190.027	3.60768	145.837	40.5963	193.604	2.20623	NA	exclude	high U
09-KK4-53	09-KK-4	PTr-K	1096.61	178229	3.87862	19.7389	1.79169	0.239853	3.19637	0.0343373	2.647	0.828127	217.637	5.66469	218.3	6.27867	225.437	41.4198	217.637	5.66469	NA	exclude	high U
09-KK4-18	09-KK-4	PTr-K	1295.33	392271	5.40142	13.7007	0.378456	1.49373	3.26356	0.148427	3.24154	0.993253	892.137	27.0072	927.835	19.8517	1013.63	7.67049	1013.63	7.67049	88.0138	exclude	high U
09-KK4-40	09-KK-4	PTr-K	540.153	141627	14.2466	18.212	2.6156	0.450955	3.81274	0.0595647	2.77409	0.727586	372.978	10.0531	377.948	12.0328	408.497	58.5203	372.978	10.0531	NA	exclude	high U/Th
09-KK4-7	09-KK-4	PTr-K	976.39	158694	21.9039	18.0658	1.36375	0.504719	3.82294	0.0661311	3.57142	0.934208	412.805	14.2809	414.891	13.021	426.493	30.4163	412.805	14.2809	NA	exclude	high U/Th
09-KK4-93	09-KK-4	PTr-K	434.775	110037	280.897	13.6737	1.15706	1.64136	2.74123	0.162775	2.48507	0.906552	972.182	22.426	986.236	17.2979	1017.63	23.4164	1017.63	23.4164	95.5342	exclude	high U/Th
09-KK4-55	09-KK-4	PTr-K	451.781	144772	14.7628	13.6442	0.758491	1.64484	4.55824	0.162769	4.49469	0.986058	972.148	40.5605	987.573	28.7917	1021.99	15.3521	1021.99	15.3521	95.1231	exclude	high U/Th
09-KK4-60	09-KK-4	PTr-K	1273.35	240419	14.5189	13.6127	0.310284	1.64791	1.73447	0.162696	1.70649	0.983869	971.74	15.3933	988.749	10.9608	1026.67	6.27594	1026.67	6.27594	94.6495	exclude	high U/Th
09-KK4-79	09-KK-4	PTr-K	698.301	191396	65.1783	13.4071	0.539574	1.60667	1.68358	0.156229	1.59477	0.947251	935.785	13.8911	972.811	10.5371	1057.42	10.8627	1057.42	10.8627	88.4974	exclude	high U/Th
09-KK4-84	09-KK-4	PTr-K	320.868	221430	13.629	5.49325	0.332041	10.3056	3.30062	0.410582	3.28388	0.994927	2217.58	61.6198	2462.6	30.5588	2671.55	5.49773	2671.55	5.49773	83.0074	exclude	high U/Th
09-KK4-82	09-KK-4	PTr-K	372.5	30418.2	4.6369	11.7836	3.13822	0.735397	6.29788	0.0628492	5.46029	0.867005	392.93	20.8144	559.716	27.1051	1312.41	60.8958	392.93	20.8144	NA	exclude	low concordance
09-KK4-61	09-KK-4	PTr-K	87.6876	19641.3	1.55656	15.9379	8.86669	0.695501	10.1221	0.0803949	4.88252	0.482362	498.479	23.4213	536.1	42.1843	699.526	189.171	498.479	23.4213	NA	exclude	low concordance
09-KK4-2	09-KK-4	PTr-K	834.015	190954	7.76048	14.6861	1.71123	1.03722	4.94789	0.110478	4.64256	0.93829	675.526	29.7746	722.535	25.5844	871.361	35.4466	675.526	29.7746	77.5254	exclude	low concordance
09-KK4-92	09-KK-4	PTr-K	451.01	28989.9	2.17586	20.2178	7.63496	0.196794	8.17639	0.0288565	2.92586	0.357843	183.388	5.29007	182.41	13.6524	169.739	178.507	183.388	5.29007	NA
09-KK4-59	09-KK-4	PTr-K	581.598	35124.7	1.7438	20.2758	6.42034	0.199117	6.73587	0.0292811	2.03742	0.302474	186.047	3.73639	184.379	11.3577	163.038	150.234	186.047	3.73639	NA
09-KK4-94	09-KK-4	PTr-K	295.65	26165.2	2.23552	21.3173	16.6038	0.193504	17.5319	0.0299172	5.62834	0.321035	190.03	10.5394	179.615	28.8696	44.6413	399.173	190.03	10.5394	NA
09-KK4-89	09-KK-4	PTr-K	678.749	26219	2.26211	20.4554	4.71457	0.21045	5.84432	0.0312217	3.45382	0.59097	198.19	6.74097	193.931	10.3177	142.408	110.703	198.19	6.74097	NA
09-KK4-88	09-KK-4	PTr-K	140.06	8751.97	1.4416	19.7977	19.7536	0.223715	20.9731	0.0321225	7.04716	0.33601	203.819	14.1388	204.997	38.9511	218.554	461.097	203.819	14.1388	NA
09-KK4-75	09-KK-4	PTr-K	547.229	31909.8	2.53875	19.2121	5.03699	0.34072	5.39501	0.0474756	1.93257	0.358215	299.005	5.64653	297.717	13.9222	287.615	115.195	299.005	5.64653	NA
09-KK4-12	09-KK-4	PTr-K	721.338	237848	4.00724	18.8085	2.39506	0.387175	3.1384	0.0528153	2.02811	0.646225	331.783	6.5587	332.304	8.89457	335.962	54.2582	331.783	6.5587	NA
09-KK4-38	09-KK-4	PTr-K	148.852	6075.69	3.30863	18.1835	6.19689	0.436631	7.99951	0.0575824	5.05874	0.63238	360.906	17.7557	367.874	24.6915	411.999	138.679	360.906	17.7557	NA
09-KK4-24	09-KK-4	PTr-K	343.367	20715.8	6.43018	18.4742	3.40687	0.439278	4.20106	0.0588578	2.45808	0.585108	368.675	8.80806	369.744	13.0199	376.424	76.6699	368.675	8.80806	NA
09-KK4-44	09-KK-4	PTr-K	459.21	91145.3	4.36906	18.4425	3.86351	0.448769	5.85483	0.0600264	4.39913	0.751367	375.786	16.0587	376.417	18.4168	380.278	86.8991	375.786	16.0587	NA
09-KK4-23	09-KK-4	PTr-K	561.41	76058.1	3.27304	18.4903	2.9892	0.449617	4.02538	0.0602956	2.69598	0.669747	377.423	9.88313	377.011	12.6779	374.46	67.2899	377.423	9.88313	NA
09-KK4-100	09-KK-4	PTr-K	401.763	16424	1.84448	16.8765	7.59291	0.503278	8.05409	0.0616011	2.68628	0.33353	385.355	10.0484	413.919	27.3855	576.423	165.26	385.355	10.0484	NA
09-KK4-67	09-KK-4	PTr-K	698.859	95202.8	4.38677	18.3805	2.36479	0.462142	3.14083	0.061607	2.06702	0.658113	385.391	7.73267	385.747	10.0803	387.856	53.0951	385.391	7.73267	NA
09-KK4-1	09-KK-4	PTr-K	291.008	32529.6	5.16466	18.0134	2.53522	0.475563	5.22651	0.0621301	4.57046	0.874476	388.567	17.2347	395.024	17.1054	432.973	56.497	388.567	17.2347	NA
09-KK4-48	09-KK-4	PTr-K	272.138	21112.5	2.40783	18.6732	6.57357	0.464058	7.68151	0.0628477	3.97415	0.517365	392.921	15.1489	387.076	24.7273	352.271	148.649	392.921	15.1489	NA
09-KK4-91	09-KK-4	PTr-K	88.1446	10945	2.14038	21.331	15.3075	0.417168	16.287	0.0645387	5.56293	0.341557	403.169	21.7411	354.024	48.7183	43.1265	367.783	403.169	21.7411	NA
09-KK4-70	09-KK-4	PTr-K	61.5784	10158.2	2.27026	23.9644	19.379	0.37225	19.8965	0.0646995	4.50836	0.22659	404.142	17.6609	321.32	54.8569	-242.874	493.49	404.142	17.6609	NA
09-KK4-11	09-KK-4	PTr-K	613.167	106011	1.76064	18.0485	2.70842	0.496118	5.48111	0.0649421	4.76519	0.869384	405.611	18.7327	409.071	18.4572	428.628	60.3919	405.611	18.7327	NA
09-KK4-74	09-KK-4	PTr-K	292.131	18568.7	2.13188	17.8344	4.02986	0.506967	5.88556	0.0655747	4.28953	0.728823	409.439	17.017	416.408	20.1072	455.198	89.4831	409.439	17.017	NA
09-KK4-32	09-KK-4	PTr-K	169.221	14587.3	2.65243	18.637	8.07653	0.498986	9.98428	0.0674471	5.86988	0.587913	420.757	23.9093	411.016	33.7596	356.647	182.618	420.757	23.9093	NA
09-KK4-13	09-KK-4	PTr-K	242.765	62815	5.09225	18.1602	5.96167	0.531266	6.40638	0.0699733	2.34525	0.36608	435.995	9.88706	432.649	22.5723	414.854	133.334	435.995	9.88706	NA
09-KK4-22	09-KK-4	PTr-K	683.931	72880.6	2.06617	17.9086	1.67139	0.560762	3.33614	0.072835	2.88726	0.86545	453.213	12.6361	452.023	12.1713	445.95	37.1747	453.213	12.6361	NA
09-KK4-15	09-KK-4	PTr-K	478.237	81490.3	4.06108	17.5131	1.9966	0.602725	5.80838	0.0765563	5.45444	0.939063	475.535	25.0043	478.962	22.1827	495.393	44.0059	475.535	25.0043	NA
09-KK4-6	09-KK-4	PTr-K	311.201	45999	2.98954	16.8946	2.15015	0.658746	4.85118	0.0807167	4.34866	0.896412	500.399	20.9376	513.847	19.5645	574.095	46.7392	500.399	20.9376	87.1631
09-KK4-71	09-KK-4	PTr-K	270.921	70599.9	3.66202	17.0599	2.87227	0.722965	3.1319	0.0894522	1.24855	0.398656	552.297	6.60857	552.416	13.3445	552.905	62.6806	552.297	6.60857	99.89
09-KK4-26	09-KK-4	PTr-K	249.017	40548.2	0.559573	16.7374	3.60742	0.762267	4.2636	0.0925324	2.27261	0.533027	570.497	12.408	575.317	18.728	594.424	78.2076	570.497	12.408	95.9746
09-KK4-78	09-KK-4	PTr-K	566.598	73696.8	8.05048	16.5931	1.74412	0.810943	3.52676	0.0975924	3.0653	0.869155	600.284	17.5698	602.983	16.0371	613.121	37.6899	600.284	17.5698	97.9063
09-KK4-85	09-KK-4	PTr-K	137.478	59238.1	1.97827	16.3094	5.81571	0.902414	6.19828	0.106744	2.14389	0.345884	653.811	13.3296	653.017	29.8626	650.271	124.94	653.811	13.3296	100.544
09-KK4-27	09-KK-4	PTr-K	132.879	77960.1	1.42322	14.3779	2.39116	1.39866	3.49754	0.145849	2.55248	0.729793	877.654	20.944	888.367	20.7108	915.155	49.2055	877.654	20.944	95.9022
09-KK4-31	09-KK-4	PTr-K	65.0969	19192.2	2.20905	14.3487	8.57818	1.42721	10.6763	0.148525	6.35597	0.595334	892.69	52.987	900.384	63.8268	919.333	176.692	919.333	176.692	97.1019
09-KK4-76	09-KK-4	PTr-K	143.903	58650.6	1.9718	14.3259	2.9187	1.43977	3.6866	0.149594	2.25215	0.610902	898.688	18.8924	905.625	22.0937	922.601	59.9958	922.601	59.9958	97.408
09-KK4-56	09-KK-4	PTr-K	123.162	34379.8	2.74914	13.797	2.05578	1.61459	3.35575	0.161564	2.65233	0.790383	965.464	23.782	975.893	21.0446	999.421	41.7571	999.421	41.7571	96.6023
09-KK4-58	09-KK-4	PTr-K	125.619	45541	3.76791	13.78	2.44867	1.65563	3.93628	0.165467	3.08194	0.782957	987.089	28.207	991.707	24.923	1001.92	49.7383	1001.92	49.7383	98.5199
09-KK4-57	09-KK-4	PTr-K	334.392	78945.5	4.34481	13.7426	0.944122	1.65992	1.88319	0.165446	1.62943	0.865249	986.97	14.9114	993.347	11.9334	1007.44	19.1466	1007.44	19.1466	97.9683
09-KK4-65	09-KK-4	PTr-K	125.622	41939.2	3.0794	13.6782	3.4231	1.68928	5.91672	0.167582	4.82597	0.81565	998.777	44.653	1004.49	37.7552	1016.96	69.3542	1016.96	69.3542	98.2116
09-KK4-51	09-KK-4	PTr-K	222.965	29832.1	3.49752	13.5888	1.53644	1.64433	5.19534	0.162057	4.96296	0.95527	968.198	44.6176	987.377	32.8147	1030.23	31.0805	1030.23	31.0805	93.9785
09-KK4-96	09-KK-4	PTr-K	205.461	85937.9	0.826402	13.4437	1.12957	1.87013	4.54117	0.182343	4.39844	0.96857	1079.76	43.7291	1070.58	30.0535	1051.93	22.7794	1051.93	22.7794	102.646
09-KK4-8	09-KK-4	PTr-K	208.2	62018.4	1.88832	13.3089	1.1495	1.80584	1.91814	0.174309	1.53555	0.800541	1035.81	14.6933	1047.57	12.5357	1072.2	23.092	1072.2	23.092	96.6059
09-KK4-34	09-KK-4	PTr-K	151.15	49267.9	1.68284	13.2532	2.64832	1.77197	5.39429	0.170325	4.69944	0.871188	1013.9	44.0902	1035.24	35.0271	1080.62	53.1421	1080.62	53.1421	93.8258
09-KK4-42	09-KK-4	PTr-K	415.955	204076	8.90403	13.2244	0.999811	1.84358	6.00932	0.176822	5.92557	0.986062	1049.59	57.3965	1061.14	39.5797	1084.99	20.0277	1084.99	20.0277	96.7372
09-KK4-45	09-KK-4	PTr-K	340.349	87854.6	1.84725	13.0816	1.36888	2.02232	6.31985	0.191871	6.16982	0.976261	1131.5	64.0301	1123.04	42.964	1106.72	27.351	1106.72	27.351	102.239
09-KK4-30	09-KK-4	PTr-K	111.187	110052	4.13777	12.9684	1.8402	1.98194	4.39488	0.186412	3.99107	0.908118	1101.91	40.4251	1109.38	29.6682	1124.04	36.686	1124.04	36.686	98.0312
09-KK4-87	09-KK-4	PTr-K	116.326	33222	1.40861	12.9408	6.03778	1.85816	6.98164	0.174399	3.5055	0.502103	1036.3	33.5583	1066.33	46.1193	1128.31	120.391	1128.31	120.391	91.8455
09-KK4-62	09-KK-4	PTr-K	93.3172	37949.1	4.64268	12.9369	3.0055	1.9785	3.9244	0.185638	2.52346	0.64302	1097.7	25.4702	1108.21	26.4752	1128.88	59.8812	1128.88	59.8812	97.2383
09-KK4-37	09-KK-4	PTr-K	555.297	152480	5.46724	12.7038	0.573645	1.97047	1.40959	0.181553	1.28759	0.913447	1075.46	12.754	1105.47	9.49469	1164.99	11.3857	1164.99	11.3857	92.3144
09-KK4-33	09-KK-4	PTr-K	189.483	36595.4	4.90666	12.4339	1.5853	2.08496	2.78444	0.188019	2.28909	0.822102	1110.64	23.3541	1143.87	19.1103	1207.46	31.2147	1207.46	31.2147	91.9815
09-KK4-20	09-KK-4	PTr-K	198.978	95033	2.2523	12.4042	1.47657	2.07686	4.74365	0.186843	4.50799	0.950321	1104.25	45.75	1141.2	32.523	1212.13	29.0403	1212.13	29.0403	91.0997
09-KK4-83	09-KK-4	PTr-K	466.761	38029.6	3.13579	12.243	0.979674	2.16244	6.59835	0.192012	6.52521	0.988917	1132.27	67.7606	1169.05	45.8439	1237.86	19.2263	1237.86	19.2263	91.4699
09-KK4-46	09-KK-4	PTr-K	227.653	69463.9	5.06678	12.0764	1.26029	2.19685	2.48187	0.192414	2.13808	0.861477	1134.44	22.2409	1180.04	17.3193	1264.66	24.5976	1264.66	24.5976	89.703
09-KK4-9	09-KK-4	PTr-K	82.137	43906.9	3.21591	12.0521	2.0955	2.31209	5.27856	0.2021	4.8448	0.917826	1186.59	52.5085	1216	37.4321	1268.59	40.9089	1268.59	40.9089	93.5366
09-KK4-14	09-KK-4	PTr-K	337.155	133470	2.45518	11.8224	1.21774	2.61179	2.66818	0.223945	2.37408	0.889777	1302.69	28.0025	1303.96	19.5936	1306.03	23.6472	1306.03	23.6472	99.7439
09-KK4-97	09-KK-4	PTr-K	516.647	33599.4	2.10815	11.7842	1.05676	2.51371	6.07346	0.21484	5.98081	0.984746	1254.55	68.1853	1276	44.1457	1312.31	20.5024	1312.31	20.5024	95.5989
09-KK4-10	09-KK-4	PTr-K	253.384	119369	3.31041	11.7703	0.795905	2.60589	5.14111	0.222454	5.07913	0.987944	1294.83	59.5838	1302.3	37.7425	1314.61	15.4369	1314.61	15.4369	98.4956
09-KK4-86	09-KK-4	PTr-K	214.644	119496	1.90984	11.7564	1.13387	2.49707	2.96949	0.212915	2.74449	0.924228	1244.33	31.0569	1271.18	21.533	1316.88	21.9838	1316.88	21.9838	94.4902
09-KK4-66	09-KK-4	PTr-K	312.253	208706	5.67621	11.7495	0.762681	2.42644	3.56707	0.20677	3.48459	0.976875	1211.58	38.489	1250.47	25.6543	1318.03	14.785	1318.03	14.785	91.9236
09-KK4-99	09-KK-4	PTr-K	129.267	62300.4	1.039	11.421	2.75081	2.84201	3.64376	0.235413	2.38956	0.655796	1362.81	29.3533	1366.7	27.3748	1372.78	52.9266	1372.78	52.9266	99.2734
09-KK4-90	09-KK-4	PTr-K	58.8549	18813	1.8898	11.412	4.02305	2.86418	5.87449	0.237061	4.28074	0.7287	1371.4	52.883	1372.54	44.2402	1374.3	77.4061	1374.3	77.4061	99.789
09-KK4-49	09-KK-4	PTr-K	394.705	124277	2.32776	10.7335	0.780205	3.28761	1.33078	0.255929	1.07807	0.810109	1468.98	14.1619	1478.12	10.3613	1491.26	14.7694	1491.26	14.7694	98.5059
09-KK4-43	09-KK-4	PTr-K	282.054	149041	3.57822	10.5196	0.781409	3.04175	2.89824	0.232071	2.79091	0.962968	1345.34	33.8885	1418.16	22.1507	1529.26	14.7161	1529.26	14.7161	87.9733
09-KK4-36	09-KK-4	PTr-K	346.897	346279	5.5926	10.4128	0.564099	3.37766	1.96759	0.255082	1.88499	0.958022	1464.63	24.6966	1499.23	15.416	1548.46	10.5977	1548.46	10.5977	94.5866
09-KK4-54	09-KK-4	PTr-K	341.986	190671	1.87627	10.1799	0.669756	3.42004	7.10213	0.252506	7.07048	0.995543	1451.39	91.8943	1509.01	55.8549	1590.83	12.5131	1590.83	12.5131	91.2345
09-KK4-16	09-KK-4	PTr-K	215.982	112200	2.12317	10.1362	1.53886	3.53297	4.29485	0.259725	4.0097	0.933606	1488.44	53.294	1534.63	34.0015	1598.86	28.7187	1598.86	28.7187	93.0936
09-KK4-52	09-KK-4	PTr-K	254.468	156036	2.07438	10.0391	0.659652	3.74678	3.59056	0.272803	3.52945	0.982979	1555.02	48.7665	1581.43	28.7851	1616.81	12.2812	1616.81	12.2812	96.1777
09-KK4-72	09-KK-4	PTr-K	460.511	162476	3.33435	10.0348	0.420261	3.78186	1.94845	0.27524	1.90259	0.976462	1567.35	26.4719	1588.9	15.6481	1617.61	7.82283	1617.61	7.82283	96.8927
09-KK4-3	09-KK-4	PTr-K	66.7756	39192.5	1.2613	9.77901	2.69083	3.66136	3.45546	0.259678	2.16786	0.627373	1488.2	28.809	1562.99	27.5659	1665.52	49.795	1665.52	49.795	89.3532
09-KK4-35	09-KK-4	PTr-K	123.913	70124.5	1.15847	9.76458	1.15272	3.95632	2.54606	0.280184	2.27016	0.891638	1592.29	32.0295	1625.29	20.6391	1668.25	21.3215	1668.25	21.3215	95.4465
09-KK4-28	09-KK-4	PTr-K	186.33	123956	3.28214	8.88958	1.11023	4.75011	2.27928	0.306255	1.99061	0.873347	1722.25	30.0858	1776.13	19.1208	1840.03	20.101	1840.03	20.101	93.599
09-KK4-80	09-KK-4	PTr-K	226.147	134548	1.0241	8.67953	0.768123	5.41558	2.52662	0.34091	2.40703	0.952668	1891.05	39.4498	1887.32	21.6593	1883.21	13.8339	1883.21	13.8339	100.416
09-KK4-17	09-KK-4	PTr-K	249.213	187284	7.07202	8.20398	0.714923	5.52917	5.16197	0.328991	5.11222	0.990363	1833.49	81.5854	1905.14	44.4144	1984.09	12.7249	1984.09	12.7249	92.4095
09-KK4-29	09-KK-4	PTr-K	700.966	306984	8.81728	7.89397	0.213281	5.48799	2.22408	0.314201	2.21383	0.995391	1761.35	34.1203	1898.72	19.1045	2052.37	3.76639	2052.37	3.76639	85.8201
09-KK4-47	09-KK-4	PTr-K	382.152	533551	7.5896	7.77958	0.5346	5.87442	2.70679	0.331451	2.65347	0.980302	1845.41	42.5828	1957.46	23.4904	2078.11	9.41097	2078.11	9.41097	88.8026
09-KK5-7	09-KK-5	PTr-K	1872.6	15359	5.19743	19.6452	1.91084	0.235141	4.19781	0.0335029	3.73769	0.89039	212.435	7.81076	214.434	8.11473	236.437	44.0849	212.435	7.81076	NA	exclude	high U
09-KK5-60	09-KK-5	PTr-K	1895.63	60692.2	3.51506	19.5055	1.62175	0.257739	3.04562	0.0364617	2.57793	0.846439	230.863	5.84619	232.843	6.33725	252.899	37.2942	230.863	5.84619	NA	exclude	high U
09-KK5-13	09-KK-5	PTr-K	2179.23	63217.1	6.48176	19.7456	1.26312	0.259639	6.88918	0.0371825	6.7724	0.983048	235.345	15.6511	234.376	14.4195	224.675	29.1868	235.345	15.6511	NA	exclude	high U
09-KK5-9	09-KK-5	PTr-K	2299.46	122840	3.20791	19.6766	0.882495	0.270238	1.78211	0.0385652	1.54826	0.868781	243.933	3.70617	242.884	3.84971	232.731	20.3887	243.933	3.70617	NA	exclude	high U
09-KK5-5	09-KK-5	PTr-K	1071.02	108179	3.04898	19.7391	2.39307	0.27332	4.26779	0.0391288	3.53373	0.828	247.431	8.57786	245.345	9.30204	225.411	55.345	247.431	8.57786	NA	exclude	high U
09-KK5-65	09-KK-5	PTr-K	712.944	521685	16.607	11.3057	0.472751	2.67067	4.46081	0.218987	4.43569	0.994368	1276.52	51.3697	1320.38	32.9664	1392.27	9.06958	1392.27	9.06958	91.6859	exclude	high U/Th
09-KK5-51	09-KK-5	PTr-K	1122.6	660032	13.2078	10.0339	2.42865	4.07838	9.90025	0.296795	9.59774	0.969444	1675.4	141.626	1649.99	80.9014	1617.77	45.2177	1617.77	45.2177	103.562	exclude	high U/Th
09-KK5-40	09-KK-5	PTr-K	180.465	179419	10.0928	9.5856	0.690629	4.03071	2.14687	0.28022	2.03275	0.946844	1592.47	28.6826	1640.41	17.4675	1702.4	12.7181	1702.4	12.7181	93.5427	exclude	high U/Th
09-KK5-98	09-KK-5	PTr-K	588.59	349395	10.0552	8.44077	0.834483	4.16254	7.19224	0.254823	7.14367	0.993246	1463.3	93.5248	1666.68	58.949	1933.3	14.9398	1933.3	14.9398	75.6895	exclude	high U/Th
09-KK5-99	09-KK-5	PTr-K	46.9868	12923.1	3.7709	16.0471	9.8404	0.744359	10.937	0.0866316	4.77338	0.436442	535.585	24.5324	564.946	47.4233	685.017	210.534	535.585	24.5324	78.1857	exclude	low concordance
09-KK5-32	09-KK-5	PTr-K	64.6751	15855.1	6.49533	14.5294	9.82316	1.05858	11.8194	0.11155	6.57296	0.556116	681.742	42.5232	733.121	61.7897	893.519	203.26	681.742	42.5232	76.2985	exclude	low concordance
09-KK5-85	09-KK-5	PTr-K	277.073	9758.25	1.92294	19.5515	12.7301	0.183306	14.8667	0.025993	7.6787	0.516504	165.421	12.5406	170.901	23.3884	247.464	294.098	165.421	12.5406	NA
09-KK5-100	09-KK-5	PTr-K	238.916	14672.5	1.9491	19.96	13.2866	0.180647	14.3566	0.0261511	5.43873	0.37883	166.414	8.93501	168.617	22.3081	199.641	309.726	166.414	8.93501	NA
09-KK5-62	09-KK-5	PTr-K	230.984	17880.2	1.03426	19.5096	11.7362	0.193589	12.1396	0.0273923	3.10338	0.255641	174.207	5.33392	179.687	19.9948	252.413	270.77	174.207	5.33392	NA
09-KK5-58	09-KK-5	PTr-K	181.168	12283	0.769295	21.4168	15.0343	0.180323	15.6769	0.0280094	4.4426	0.283384	178.078	7.80301	168.338	24.3234	33.5173	361.808	178.078	7.80301	NA
09-KK5-17	09-KK-5	PTr-K	179.961	7223.89	4.68368	24.1364	23.8554	0.173769	24.5094	0.030419	5.62437	0.229478	193.17	10.7035	162.685	36.8591	-260.978	612.174	193.17	10.7035	NA
09-KK5-23	09-KK-5	PTr-K	298.906	16824.6	3.862	20.5588	11.0585	0.208879	11.3741	0.0311452	2.66105	0.233957	197.712	5.18136	192.611	19.9579	130.546	260.765	197.712	5.18136	NA
09-KK5-73	09-KK-5	PTr-K	238.869	32741	3.9218	20.8883	4.40652	0.219787	5.99082	0.0332969	4.05863	0.677475	211.149	8.43096	201.733	10.961	93.0212	104.397	211.149	8.43096	NA
09-KK5-42	09-KK-5	PTr-K	436.98	6814.61	4.04047	19.4838	5.36135	0.256406	5.629	0.0362328	1.7151	0.30469	229.44	3.86591	231.767	11.6648	255.446	123.329	229.44	3.86591	NA
09-KK5-87	09-KK-5	PTr-K	239.506	14413.1	3.19048	20.3073	9.55577	0.247676	9.89402	0.0364782	2.56495	0.259243	230.966	5.81931	224.686	19.9453	159.414	223.982	230.966	5.81931	NA
09-KK5-34	09-KK-5	PTr-K	467.149	30599.2	4.47989	20.3987	4.61871	0.248058	9.27408	0.036699	8.04215	0.867164	232.339	18.3524	224.997	18.7184	148.928	108.317	232.339	18.3524	NA
09-KK5-26	09-KK-5	PTr-K	624.399	37106	3.53283	19.621	3.81546	0.259863	4.04962	0.0369797	1.3571	0.335117	234.085	3.11977	234.557	8.48156	239.31	88.0051	234.085	3.11977	NA
09-KK5-59	09-KK-5	PTr-K	529.87	15069	2.80728	19.2621	2.8591	0.270534	3.6686	0.0377941	2.29873	0.626596	239.145	5.39658	243.121	7.93184	281.708	65.4505	239.145	5.39658	NA
09-KK5-2	09-KK-5	PTr-K	342.185	84391.3	3.88416	19.8528	9.5421	0.267708	9.75734	0.0385463	2.03812	0.20888	243.816	4.87645	240.86	20.925	212.112	221.514	243.816	4.87645	NA
09-KK5-89	09-KK-5	PTr-K	189.063	23383.7	1.98994	20.6873	7.32775	0.25931	8.72079	0.0389065	4.72824	0.54218	246.051	11.4147	234.111	18.2356	115.877	173.016	246.051	11.4147	NA
09-KK5-29	09-KK-5	PTr-K	272.197	23903.8	2.1458	20.9308	6.37164	0.257029	6.4884	0.0390181	1.2254	0.18886	246.744	2.96647	232.27	13.4719	88.2369	151.176	246.744	2.96647	NA
09-KK5-28	09-KK-5	PTr-K	72.8741	6904.13	3.35141	18.1326	29.2803	0.300408	29.8334	0.0395066	5.71809	0.191667	249.774	14.0092	266.719	70.0895	418.26	666.948	249.774	14.0092	NA
09-KK5-41	09-KK-5	PTr-K	476.068	69732.5	3.32833	19.4237	3.76994	0.284429	4.71002	0.0400686	2.82345	0.599456	253.258	7.01198	254.165	10.5909	262.535	86.6067	253.258	7.01198	NA
09-KK5-78	09-KK-5	PTr-K	203.463	12120.8	3.76783	21.0152	11.6162	0.265038	12.16	0.0403961	3.59544	0.295679	255.288	8.99935	238.719	25.8738	78.6465	276.649	255.288	8.99935	NA
09-KK5-6	09-KK-5	PTr-K	588.124	42528.3	2.5073	19.837	3.45497	0.285349	4.47843	0.0410536	2.84949	0.636269	259.36	7.24374	254.892	10.0955	214.006	80.0383	259.36	7.24374	NA
09-KK5-48	09-KK-5	PTr-K	314.647	31942.3	2.32361	19.6906	5.59927	0.29311	6.19316	0.0418589	2.64639	0.427309	264.345	6.85412	261.004	14.255	231.092	129.371	264.345	6.85412	NA
09-KK5-82	09-KK-5	PTr-K	114.73	11380.1	4.08119	22.4554	20.4194	0.26573	20.9685	0.0432773	4.7669	0.227336	273.115	12.7472	239.274	44.7278	-81.1209	504.303	273.115	12.7472	NA
09-KK5-22	09-KK-5	PTr-K	341.945	39578.8	4.65633	18.441	3.01442	0.414489	3.40189	0.0554365	1.57675	0.463491	347.813	5.3388	352.103	10.1223	380.468	67.7743	347.813	5.3388	NA
09-KK5-49	09-KK-5	PTr-K	166.845	20660.6	3.01806	17.9717	6.41981	0.463118	7.07423	0.0603643	2.97167	0.42007	377.841	10.9055	386.424	22.7402	438.128	143.018	377.841	10.9055	NA
09-KK5-47	09-KK-5	PTr-K	255.684	39240.5	2.33249	18.3115	4.05012	0.490869	5.34998	0.0651912	3.49554	0.653374	407.119	13.7909	405.502	17.8876	396.286	90.8488	407.119	13.7909	NA
09-KK5-64	09-KK-5	PTr-K	281.626	34881.7	1.32618	18.99	3.33321	0.496245	3.70964	0.0683472	1.62823	0.43892	426.19	6.71496	409.158	12.4933	314.164	75.8454	426.19	6.71496	NA
09-KK5-8	09-KK-5	PTr-K	358.498	60505.7	2.21528	18.5599	2.94184	0.514541	3.77428	0.069262	2.36448	0.626471	431.708	9.87335	421.498	13.0205	365.997	66.3015	431.708	9.87335	NA
09-KK5-91	09-KK-5	PTr-K	239.829	46734.8	1.63387	17.7238	4.72564	0.541526	5.94542	0.0696104	3.60782	0.606823	433.808	15.136	439.43	21.2102	469.006	104.688	433.808	15.136	NA
09-KK5-88	09-KK-5	PTr-K	178.765	20144.7	2.48323	17.4279	2.77298	0.581281	3.78366	0.0734734	2.57422	0.680353	457.048	11.358	465.284	14.1236	506.128	61.031	457.048	11.358	NA
09-KK5-86	09-KK-5	PTr-K	222.754	43520.6	1.50892	17.3188	3.12878	0.595345	3.98388	0.0747799	2.46618	0.619038	464.889	11.0613	474.275	15.0967	519.917	68.6802	464.889	11.0613	NA
09-KK5-35	09-KK-5	PTr-K	167.44	60281.7	2.88636	18.9207	8.10034	0.546452	8.46933	0.0749874	2.47266	0.291955	466.133	11.1191	442.669	30.3965	322.475	184.242	466.133	11.1191	NA
09-KK5-1	09-KK-5	PTr-K	68.5579	25120.4	3.16839	16.0565	9.31867	0.9759	11.8466	0.113646	7.3146	0.617445	693.889	48.1199	691.5	59.4783	683.758	199.358	693.889	48.1199	101.482
09-KK5-63	09-KK-5	PTr-K	104.657	32615.5	4.76186	13.9075	3.78503	1.60565	6.60113	0.161957	5.40818	0.819282	967.642	48.5945	972.414	41.3259	983.231	77.1099	983.231	77.1099	98.4146
09-KK5-77	09-KK-5	PTr-K	60.4632	23603.5	3.99309	13.81	5.30876	1.62869	6.24942	0.163129	3.29731	0.527619	974.141	29.8115	981.353	39.3356	997.504	107.911	997.504	107.911	97.6578
09-KK5-71	09-KK-5	PTr-K	57.908	17261.9	3.29497	13.3851	3.72743	1.84113	4.17212	0.178733	1.87426	0.449235	1060.05	18.3206	1060.27	27.4591	1060.73	75.0301	1060.73	75.0301	99.9363
09-KK5-11	09-KK-5	PTr-K	173.021	52367.9	3.69107	13.2112	0.834086	1.90182	2.77368	0.182225	2.6453	0.953714	1079.12	26.2847	1081.73	18.46	1086.96	16.7001	1086.96	16.7001	99.2791
09-KK5-10	09-KK-5	PTr-K	98.3579	20404	3.41142	13.1484	2.88382	2.04593	9.32003	0.195101	8.86265	0.950925	1148.95	93.2755	1130.94	63.6482	1096.52	57.7315	1096.52	57.7315	104.781
09-KK5-30	09-KK-5	PTr-K	42.0103	11928.1	2.46998	13.0541	8.7147	1.8601	9.66915	0.176109	4.18886	0.433219	1045.68	40.4346	1067.02	63.9362	1110.89	174.355	1110.89	174.355	94.1302
09-KK5-93	09-KK-5	PTr-K	290.341	160325	7.19622	13.0104	0.627348	1.84799	1.95199	0.174377	1.84843	0.946947	1036.18	17.6932	1062.71	12.8615	1117.62	12.5294	1117.62	12.5294	92.7136
09-KK5-97	09-KK-5	PTr-K	60.9511	11966.6	4.68345	12.9956	4.74369	1.80595	6.56013	0.170216	4.53131	0.690735	1013.3	42.4897	1047.61	42.8969	1119.88	94.6888	1119.88	94.6888	90.4829
09-KK5-56	09-KK-5	PTr-K	217.836	67831.4	1.64827	12.9704	1.0796	2.03827	3.1679	0.191741	2.97826	0.940138	1130.8	30.8899	1128.38	21.5825	1123.74	21.5221	1123.74	21.5221	100.628
09-KK5-36	09-KK-5	PTr-K	136.088	120427	4.99388	12.717	3.00695	2.11957	3.43894	0.195493	1.6687	0.485237	1151.06	17.5906	1155.2	23.7294	1162.95	59.6023	1162.95	59.6023	98.9781
09-KK5-80	09-KK-5	PTr-K	198.244	235370	4.00976	12.5536	1.17937	2.17963	2.03617	0.19845	1.65984	0.815178	1166.99	17.7181	1174.56	14.1735	1188.56	23.3083	1188.56	23.3083	98.1852
09-KK5-21	09-KK-5	PTr-K	153.389	80875.5	8.80858	12.4633	1.8635	2.25276	2.38534	0.203632	1.48903	0.624242	1194.8	16.2395	1197.65	16.7757	1202.81	36.7356	1202.81	36.7356	99.3344
09-KK5-44	09-KK-5	PTr-K	138.154	63403.8	2.83791	12.2833	1.70604	2.41089	3.26665	0.214779	2.78575	0.852786	1254.23	31.7511	1245.85	23.4487	1231.41	33.4851	1231.41	33.4851	101.853
09-KK5-94	09-KK-5	PTr-K	251.645	62013.2	2.34562	12.2186	0.748838	2.31741	2.59914	0.205363	2.48893	0.957597	1204.06	27.3361	1217.63	18.4379	1241.78	14.6916	1241.78	14.6916	96.9631
09-KK5-20	09-KK-5	PTr-K	49.9391	29868.6	1.95525	12.1048	2.49095	2.36896	5.04831	0.207976	4.39097	0.869789	1218.03	48.7351	1233.29	36.0596	1260.07	48.6726	1260.07	48.6726	96.6632
09-KK5-38	09-KK-5	PTr-K	249.564	105696	3.08549	11.6151	0.943529	2.67536	1.86815	0.225374	1.61236	0.863083	1310.21	19.1169	1321.68	13.8086	1340.3	18.2328	1340.3	18.2328	97.7552
09-KK5-81	09-KK-5	PTr-K	629.397	360470	6.06638	11.1326	0.33869	3.06875	2.05226	0.247775	2.02412	0.986288	1426.99	25.9106	1424.92	15.718	1421.82	6.47159	1421.82	6.47159	100.364
09-KK5-66	09-KK-5	PTr-K	123.537	61152.4	1.96769	10.9513	1.03741	3.03331	2.56744	0.240923	2.34852	0.914731	1391.49	29.3934	1416.04	19.6083	1453.14	19.7392	1453.14	19.7392	95.758
09-KK5-16	09-KK-5	PTr-K	78.4298	28551.2	4.26975	10.7474	1.29845	3.3545	2.17751	0.261476	1.74803	0.802763	1497.39	23.3572	1493.84	17.0342	1488.8	24.5885	1488.8	24.5885	100.577
09-KK5-72	09-KK-5	PTr-K	47.4857	23803.2	2.39149	9.90745	2.89213	4.1879	3.59573	0.300924	2.13655	0.594191	1695.89	31.8596	1671.65	29.4811	1641.34	53.6896	1641.34	53.6896	103.323
09-KK5-43	09-KK-5	PTr-K	318.796	195607	6.03999	9.5482	1.77738	3.63313	3.72274	0.251594	3.27105	0.878666	1446.69	42.3886	1556.82	29.6499	1709.59	32.7043	1709.59	32.7043	84.6221
09-KK5-68	09-KK-5	PTr-K	238.106	173475	2.86421	9.53728	0.523022	4.39863	2.0562	0.304257	1.98857	0.967109	1712.38	29.9047	1712.08	17.0126	1711.7	9.61985	1711.7	9.61985	100.04
09-KK5-55	09-KK-5	PTr-K	47.0098	20406.8	0.974289	9.34967	2.36308	4.69958	7.34169	0.318679	6.95099	0.946783	1783.28	108.298	1767.16	61.5423	1748.16	43.2757	1748.16	43.2757	102.009
09-KK5-33	09-KK-5	PTr-K	322.952	292559	4.29843	9.34784	0.829981	4.68887	1.85269	0.317891	1.65638	0.89404	1779.42	25.756	1765.26	15.5063	1748.52	15.1965	1748.52	15.1965	101.767
09-KK5-45	09-KK-5	PTr-K	172.271	148167	3.86199	9.25683	0.710037	4.61317	1.54504	0.309714	1.37222	0.888147	1739.3	20.9184	1751.65	12.8939	1766.41	12.9729	1766.41	12.9729	98.4651
09-KK5-4	09-KK-5	PTr-K	491.958	264951	4.84633	9.22746	0.365307	4.6236	2.41022	0.309429	2.38238	0.988447	1737.9	36.2921	1753.54	20.1238	1772.22	6.66957	1772.22	6.66957	98.0634
09-KK5-19	09-KK-5	PTr-K	198.123	86559	3.74957	9.1945	0.936001	4.52397	4.28272	0.30168	4.17919	0.975825	1699.63	62.4404	1735.39	35.6284	1778.75	17.0738	1778.75	17.0738	95.5523
09-KK5-53	09-KK-5	PTr-K	291.248	115719	2.2377	9.18858	0.795017	4.77635	4.59122	0.318305	4.52187	0.984894	1781.45	70.3851	1780.75	38.5665	1779.92	14.4996	1779.92	14.4996	100.086
09-KK5-27	09-KK-5	PTr-K	232.745	156998	6.15715	9.16743	0.716846	4.49062	2.30779	0.298575	2.19364	0.950534	1684.24	32.5141	1729.24	19.1674	1784.12	13.0669	1784.12	13.0669	94.4016
09-KK5-79	09-KK-5	PTr-K	37.5495	31539.9	1.03502	9.14449	3.96818	4.61574	4.51852	0.306126	2.16115	0.478286	1721.61	32.6528	1752.12	37.7277	1788.69	72.3238	1788.69	72.3238	96.2501
09-KK5-46	09-KK-5	PTr-K	56.0862	37561.1	2.39429	9.14318	2.10644	4.80545	3.24461	0.318662	2.46787	0.760607	1783.19	38.4453	1785.85	27.2769	1788.95	38.3797	1788.95	38.3797	99.6783
09-KK5-92	09-KK-5	PTr-K	166.071	99870.8	2.60891	9.11746	0.901358	4.42016	2.33482	0.292288	2.15382	0.922478	1652.95	31.4039	1716.13	19.3358	1794.08	16.4107	1794.08	16.4107	92.1338
09-KK5-76	09-KK-5	PTr-K	620.863	304259	8.28368	9.10701	0.24557	4.85824	1.80038	0.320888	1.78355	0.990654	1794.06	27.9315	1795.04	15.1613	1796.17	4.47027	1796.17	4.47027	99.883
09-KK5-84	09-KK-5	PTr-K	66.5283	62518.9	4.07569	9.05331	2.37813	4.15014	3.44341	0.272501	2.49029	0.723204	1553.49	34.3781	1664.24	28.1821	1806.93	43.2361	1806.93	43.2361	85.974
09-KK5-18	09-KK-5	PTr-K	91.8491	54792.6	2.30957	9.0021	0.975173	4.01575	2.51229	0.262186	2.3153	0.921591	1501.01	31.0038	1637.39	20.4263	1817.23	17.7045	1817.23	17.7045	82.5992
09-KK5-25	09-KK-5	PTr-K	247.648	148078	5.24433	8.97413	0.692717	4.94128	2.95451	0.32161	2.87215	0.972125	1797.59	45.0567	1809.34	24.9552	1822.88	12.5671	1822.88	12.5671	98.6128
09-KK5-12	09-KK-5	PTr-K	118.886	84338.9	6.62249	8.91416	1.19681	4.7683	2.23868	0.308278	1.89191	0.845103	1732.23	28.7386	1779.33	18.7926	1835.03	21.68	1835.03	21.68	94.3976
09-KK5-75	09-KK-5	PTr-K	28.4016	29092.4	0.848163	8.84389	3.32121	5.18489	3.67475	0.332569	1.57269	0.427972	1850.82	25.3021	1850.14	31.2898	1849.36	60.0784	1849.36	60.0784	100.079
09-KK5-14	09-KK-5	PTr-K	67.3386	35584.2	5.45499	8.78245	1.72166	5.29469	2.09946	0.337253	1.20151	0.572295	1873.44	19.5339	1868.01	17.9328	1861.95	31.0888	1861.95	31.0888	100.617
09-KK5-24	09-KK-5	PTr-K	20.8715	15012.5	3.87439	8.55177	4.39506	5.57277	5.83398	0.345642	3.83651	0.657613	1913.75	63.5279	1911.9	50.2658	1909.88	78.945	1909.88	78.945	100.203
09-KK5-39	09-KK-5	PTr-K	192.508	101101	2.57982	8.54138	0.865671	5.4817	2.66638	0.33958	2.52194	0.94583	1884.65	41.2128	1897.73	22.9008	1912.06	15.5373	1912.06	15.5373	98.5664
09-KK5-3	09-KK-5	PTr-K	132.517	138674	3.02076	8.42771	0.709554	5.69324	2.58199	0.347991	2.48258	0.961499	1925	41.315	1930.34	22.3037	1936.07	12.6987	1936.07	12.6987	99.4281
09-KK5-95	09-KK-5	PTr-K	698.32	839591	4.48885	7.73422	0.243844	6.16479	3.38532	0.345807	3.37653	0.997402	1914.54	55.9307	1999.47	29.5848	2088.4	4.28855	2088.4	4.28855	91.6753
09-KK5-96	09-KK-5	PTr-K	429.965	323485	3.15189	7.53566	0.52403	6.11193	3.6705	0.33404	3.6329	0.989756	1857.93	58.6425	1991.95	32.0398	2134.02	9.1692	2134.02	9.1692	87.0627
09-KK5-50	09-KK-5	PTr-K	331.254	230855	3.4811	6.86474	0.367116	8.23128	3.51436	0.409817	3.49514	0.994529	2214.09	65.4975	2256.79	31.8291	2295.72	6.3116	2295.72	6.3116	96.4442
09-KK5-70	09-KK-5	PTr-K	103.28	150971	1.52557	5.72663	0.692561	11.6786	2.33515	0.485053	2.23009	0.955008	2549.24	46.9564	2578.99	21.844	2602.44	11.5401	2602.44	11.5401	97.9558
09-KK5-15	09-KK-5	PTr-K	192.492	333740	3.85888	5.71207	0.507315	11.7905	2.35365	0.488454	2.29833	0.976494	2563.98	48.6213	2587.91	22.0336	2606.68	8.4522	2606.68	8.4522	98.3621
09-KK5-90	09-KK-5	PTr-K	211.878	262131	1.7807	5.68556	0.250963	12.0299	2.96106	0.49606	2.95041	0.996402	2596.84	63.0666	2606.74	27.7656	2614.42	4.17803	2614.42	4.17803	99.3275
09-KK5-61	09-KK-5	PTr-K	98.0142	24681.9	1.49259	5.59688	0.666915	12.0735	1.78308	0.490091	1.65366	0.927419	2571.07	35.0617	2610.13	16.7217	2640.56	11.0719	2640.56	11.0719	97.3682
09-KK6-40	09-KK-6	pre-Mz	430.18	67514.5	19.4032	13.4877	0.601711	1.5786	2.8708	0.154423	2.80704	0.977788	925.707	24.2055	961.819	17.8471	1045.34	12.1552	1045.34	12.1552	88.5557	exclude	high U/Th
09-KK6-11	09-KK-6	pre-Mz	145.484	99284.2	15.2562	9.37603	0.985693	4.46998	3.3833	0.303965	3.23653	0.956619	1710.94	48.6366	1725.41	28.0802	1743	18.0604	1743	18.0604	98.1605	exclude	high U/Th
09-KK6-63	09-KK-6	pre-Mz	130.077	50349.1	3.50086	12.9706	2.16094	1.57303	3.58528	0.147978	2.86087	0.797948	889.621	23.7729	959.624	22.2595	1123.72	43.0774	1123.72	43.0774	79.1676	exclude	low concordance
09-KK6-16	09-KK-6	pre-Mz	113.556	39416.4	4.278	11.8107	1.93323	1.94592	5.51996	0.166686	5.17036	0.936665	993.824	47.6201	1097.04	37.0393	1307.95	37.5318	1307.95	37.5318	75.9831	exclude	low concordance
09-KK6-3	09-KK-6	pre-Mz	225.596	39006.5	3.2499	9.4035	0.878885	3.49503	5.13456	0.238363	5.05878	0.985241	1378.18	62.7724	1526.09	40.5585	1737.64	16.1139	1737.64	16.1139	79.3133	exclude	low concordance
09-KK6-31	09-KK-6	pre-Mz	379.306	126996	1.69882	9.37431	0.50834	3.20266	7.80884	0.217745	7.79227	0.997879	1269.95	89.8261	1457.8	60.4945	1743.34	9.31266	1743.34	9.31266	72.8459	exclude	low concordance
09-KK6-53	09-KK-6	pre-Mz	422.984	43439.6	4.47167	9.3732	0.46538	3.1853	5.93865	0.216539	5.92038	0.996925	1263.56	67.9352	1453.6	45.9237	1743.55	8.52527	1743.55	8.52527	72.4706	exclude	low concordance
09-KK6-89	09-KK-6	pre-Mz	64.8638	27400.3	2.26307	13.8337	4.09429	1.75116	4.46519	0.175697	1.78178	0.399038	1043.42	17.165	1027.59	28.8667	994.054	83.2578	994.054	83.2578	104.967
09-KK6-79	09-KK-6	pre-Mz	188.24	83040.4	4.81331	13.6143	1.49889	1.61937	1.96985	0.159897	1.27813	0.648847	956.206	11.3583	977.747	12.3661	1026.43	30.3207	1026.43	30.3207	93.1583
09-KK6-86	09-KK-6	pre-Mz	147.109	38228.7	3.23316	13.6122	3.19714	1.68672	3.54084	0.166522	1.52179	0.429783	992.92	14.004	1003.52	22.575	1026.74	64.6617	1026.74	64.6617	96.7061
09-KK6-49	09-KK-6	pre-Mz	218.58	932753	4.40973	13.529	1.53753	1.72349	3.29882	0.169111	2.9186	0.88474	1007.21	27.2152	1017.33	21.2	1039.14	31.0606	1039.14	31.0606	96.9275
09-KK6-22	09-KK-6	pre-Mz	70.1216	19038.8	1.16989	13.4959	3.15736	1.87871	3.97058	0.183891	2.40761	0.606361	1088.19	24.1076	1073.61	26.3174	1044.08	63.689	1044.08	63.689	104.225
09-KK6-12	09-KK-6	pre-Mz	33.7049	10590.1	1.75817	13.4917	5.59544	1.75783	7.00878	0.172006	4.22067	0.602197	1023.15	39.9318	1030.05	45.3912	1044.71	112.938	1044.71	112.938	97.9368
09-KK6-64	09-KK-6	pre-Mz	27.2848	21460.6	6.28109	13.272	5.97941	1.67495	8.11231	0.161228	5.48235	0.675807	963.595	49.0699	999.068	51.622	1077.76	120.118	1077.76	120.118	89.4075
09-KK6-81	09-KK-6	pre-Mz	77.453	44024	3.86748	13.2669	2.59352	1.94404	3.20819	0.187056	1.88842	0.588624	1105.41	19.183	1096.39	21.5138	1078.52	52.0768	1078.52	52.0768	102.493
09-KK6-77	09-KK-6	pre-Mz	131.251	34465	4.2661	13.1642	3.51118	2.01259	5.25957	0.192155	3.91595	0.744538	1133.04	40.6892	1119.77	35.6923	1094.12	70.3232	1094.12	70.3232	103.557
09-KK6-10	09-KK-6	pre-Mz	97.585	45814.9	2.12495	13.0885	3.38242	1.91928	4.82443	0.18219	3.44012	0.713062	1078.93	34.1769	1087.82	32.2169	1105.66	67.6446	1105.66	67.6446	97.582
09-KK6-20	09-KK-6	pre-Mz	202.803	68505	3.8846	13.0147	1.20532	1.90986	2.4199	0.180274	2.09836	0.867127	1068.47	20.661	1084.53	16.1285	1116.96	24.0578	1116.96	24.0578	95.6592
09-KK6-69	09-KK-6	pre-Mz	157.196	88657.1	4.61191	12.9562	1.59604	1.83925	3.8266	0.172829	3.47786	0.908865	1027.68	33.0382	1059.59	25.175	1125.93	31.79	1125.93	31.79	91.2742
09-KK6-33	09-KK-6	pre-Mz	102.759	29564.6	3.51899	12.955	3.25535	1.91552	4.18873	0.17998	2.63594	0.629294	1066.86	25.9182	1086.51	27.9507	1126.1	64.8876	1126.1	64.8876	94.7398
09-KK6-41	09-KK-6	pre-Mz	183.721	61191.5	5.55271	12.9122	1.30892	2.00846	2.68683	0.188088	2.34644	0.873312	1111.01	23.9465	1118.37	18.2153	1132.69	26.0415	1132.69	26.0415	98.0863
09-KK6-27	09-KK-6	pre-Mz	132.271	79398.5	2.86272	12.8705	1.99411	2.01154	4.13536	0.187769	3.6228	0.876056	1109.28	36.9198	1119.41	28.0539	1139.12	39.6665	1139.12	39.6665	97.3796
09-KK6-56	09-KK-6	pre-Mz	55.9108	21816.3	2.13177	12.8597	4.21361	1.9872	4.64655	0.18534	1.95854	0.421504	1096.08	19.7414	1111.17	31.3961	1140.8	83.803	1140.8	83.803	96.0807
09-KK6-24	09-KK-6	pre-Mz	104.232	32168.7	3.56792	12.8517	2.15594	1.93152	2.63108	0.180036	1.50815	0.573206	1067.17	14.833	1092.07	17.6041	1142.02	42.8801	1142.02	42.8801	93.4455
09-KK6-39	09-KK-6	pre-Mz	118.697	80142.9	3.1246	12.7945	3.85711	1.89623	5.11327	0.17596	3.35682	0.656492	1044.87	32.3797	1079.77	34.0055	1150.9	76.5932	1150.9	76.5932	90.787
09-KK6-25	09-KK-6	pre-Mz	49.7791	28685.7	4.54388	12.7612	4.57664	2.06463	5.16604	0.191087	2.39633	0.463862	1127.26	24.783	1137.15	35.3531	1156.07	90.8394	1156.07	90.8394	97.5082
09-KK6-66	09-KK-6	pre-Mz	40.9214	9987.17	2.64179	12.7477	8.31857	1.84882	9.54828	0.170933	4.68733	0.490908	1017.25	44.1108	1063.01	63.0002	1158.16	165.266	1158.16	165.266	87.8335
09-KK6-45	09-KK-6	pre-Mz	47.3201	22048.3	2.75027	12.6281	7.48058	1.80924	8.45969	0.165704	3.95059	0.46699	988.398	36.2017	1048.8	55.3761	1176.87	148.167	1176.87	148.167	83.9851
09-KK6-60	09-KK-6	pre-Mz	100.478	44689.9	2.5047	12.5871	2.47145	1.89026	5.06828	0.172562	4.42486	0.873049	1026.21	41.9791	1077.67	33.6693	1183.29	48.8652	1183.29	48.8652	86.7251
09-KK6-74	09-KK-6	pre-Mz	120.399	19745.2	4.26456	12.5763	2.43492	1.88738	3.77989	0.172151	2.89115	0.764876	1023.95	27.3727	1076.66	25.093	1185	48.1123	1185	48.1123	86.4098
09-KK6-1	09-KK-6	pre-Mz	56.3681	17673.8	3.33942	12.3126	4.58503	2.23704	5.38851	0.199766	2.83082	0.525344	1174.06	30.385	1192.73	37.829	1226.7	90.0668	1226.7	90.0668	95.7091
09-KK6-90	09-KK-6	pre-Mz	381.222	134586	6.47909	12.3119	0.752081	2.06562	2.38864	0.184448	2.26715	0.949139	1091.23	22.7593	1137.48	16.3437	1226.81	14.7587	1226.81	14.7587	88.949
09-KK6-34	09-KK-6	pre-Mz	99.5743	49882.1	3.84406	12.2499	1.56904	2.20555	2.96692	0.19595	2.51808	0.848719	1153.53	26.5964	1182.8	20.7305	1236.76	30.7882	1236.76	30.7882	93.2705
09-KK6-94	09-KK-6	pre-Mz	119.058	21026.2	3.80043	12.2239	4.57956	2.14904	4.87591	0.190524	1.67397	0.343314	1124.22	17.2695	1164.74	33.7997	1240.91	89.7958	1240.91	89.7958	90.5962
09-KK6-76	09-KK-6	pre-Mz	138.504	43816.8	5.21198	12.1573	1.642	2.32823	2.01076	0.205287	1.1606	0.577195	1203.66	12.743	1220.94	14.2834	1251.59	32.123	1251.59	32.123	96.1708
09-KK6-58	09-KK-6	pre-Mz	65.7989	34520.4	3.19953	11.8534	3.75984	2.28656	7.15737	0.196573	6.09028	0.850911	1156.88	64.4992	1208.14	50.6038	1300.94	73.0835	1300.94	73.0835	88.9268
09-KK6-19	09-KK-6	pre-Mz	81.5948	36412.7	1.87267	11.7518	2.14809	2.47566	3.08197	0.211007	2.21003	0.717085	1234.18	24.8238	1264.95	22.2937	1317.64	41.6458	1317.64	41.6458	93.6656
09-KK6-46	09-KK-6	pre-Mz	210.068	114050	2.75655	11.7449	0.946235	2.23793	2.17171	0.190632	1.95473	0.900087	1124.8	20.1756	1193.01	15.2421	1318.78	18.3401	1318.78	18.3401	85.2908
09-KK6-92	09-KK-6	pre-Mz	205.713	93555.9	5.78467	11.4953	1.3839	2.75963	5.65306	0.230075	5.48106	0.969572	1334.89	66.09	1344.69	42.1569	1360.3	26.6694	1360.3	26.6694	98.1323
09-KK6-67	09-KK-6	pre-Mz	49.9195	21070.6	2.111	11.481	2.9488	2.521	4.30966	0.209919	3.14289	0.729267	1228.39	35.1518	1278.11	31.3414	1362.7	56.817	1362.7	56.817	90.1435
09-KK6-37	09-KK-6	pre-Mz	89.4342	65149.5	3.38515	11.4383	2.63531	2.74533	3.50217	0.227747	2.30658	0.658615	1322.68	27.5825	1340.82	26.0715	1369.88	50.7237	1369.88	50.7237	96.5541
09-KK6-8	09-KK-6	pre-Mz	41.5273	19392	2.04969	11.3671	4.3822	2.87259	6.76832	0.236823	5.15815	0.762101	1370.16	63.671	1374.75	51.0209	1381.88	84.2351	1381.88	84.2351	99.1521
09-KK6-9	09-KK-6	pre-Mz	75.741	30531.1	2.15248	11.3367	2.55871	2.82025	4.08762	0.231885	3.18774	0.779851	1344.37	38.682	1360.93	30.6498	1387.02	49.1331	1387.02	49.1331	96.9253
09-KK6-13	09-KK-6	pre-Mz	196.511	11191.2	1.15556	11.1837	2.53792	2.80695	5.36508	0.227677	4.72685	0.881039	1322.31	56.5114	1357.39	40.1875	1413.06	48.5603	1413.06	48.5603	93.578
09-KK6-7	09-KK-6	pre-Mz	127.57	104073	4.15105	11.153	1.40546	2.99871	3.05168	0.242563	2.70877	0.887633	1400.01	34.088	1407.29	23.2413	1418.32	26.869	1418.32	26.869	98.7089
09-KK6-88	09-KK-6	pre-Mz	56.7745	24044	3.33138	11.1158	2.16253	2.80069	3.01693	0.225791	2.10365	0.69728	1312.4	24.9794	1355.72	22.5772	1424.7	41.3094	1424.7	41.3094	92.1176
09-KK6-32	09-KK-6	pre-Mz	168.748	70783	3.2276	11.1029	1.29095	2.82747	8.61773	0.227685	8.52049	0.988716	1322.35	101.875	1362.85	64.7287	1426.92	24.6509	1426.92	24.6509	92.672
09-KK6-35	09-KK-6	pre-Mz	185.27	151810	3.42095	11.0763	0.896904	2.85143	1.85581	0.229064	1.62468	0.875457	1329.59	19.5196	1369.19	13.9518	1431.5	17.1156	1431.5	17.1156	92.8813
09-KK6-78	09-KK-6	pre-Mz	199.253	327630	8.15097	11.0711	1.05128	2.89881	2.35082	0.23276	2.10265	0.894434	1348.95	25.5928	1381.6	17.7493	1432.4	20.0593	1432.4	20.0593	94.1742
09-KK6-48	09-KK-6	pre-Mz	44.6373	10429.3	3.92371	11.046	3.65085	2.72727	9.48887	0.21849	8.75842	0.92302	1273.89	101.249	1335.91	70.6124	1436.72	69.6411	1436.72	69.6411	88.6664
09-KK6-91	09-KK-6	pre-Mz	192.427	10424.4	2.11563	10.9593	1.69019	2.79358	3.79219	0.222046	3.3947	0.895181	1292.68	39.7631	1353.82	28.3625	1451.74	32.1674	1451.74	32.1674	89.0435
09-KK6-83	09-KK-6	pre-Mz	95.1953	50250.9	2.42582	10.9542	2.49575	2.72312	3.64827	0.216344	2.66104	0.729397	1262.53	30.5113	1334.78	27.1006	1452.63	47.4968	1452.63	47.4968	86.9134
09-KK6-29	09-KK-6	pre-Mz	139.851	69352.5	1.10424	10.9519	1.1858	3.26867	5.63273	0.259632	5.5065	0.97759	1487.96	73.1691	1473.63	43.8225	1453.02	22.5632	1453.02	22.5632	102.404
09-KK6-44	09-KK-6	pre-Mz	127.537	192255	3.00912	10.9382	0.931891	3.08284	3.01559	0.244566	2.86798	0.951054	1410.39	36.331	1428.43	23.1241	1455.4	17.726	1455.4	17.726	96.9074
09-KK6-62	09-KK-6	pre-Mz	118.648	63215.2	2.82318	10.9346	1.01442	3.07977	3.25229	0.244241	3.09003	0.950112	1408.71	39.1022	1427.67	24.9338	1456.04	19.2942	1456.04	19.2942	96.7495
09-KK6-30	09-KK-6	pre-Mz	98.5864	59163.6	2.54963	10.8758	2.23883	3.04188	2.63604	0.23994	1.39152	0.527883	1386.39	17.3585	1418.19	20.1464	1466.27	42.528	1466.27	42.528	94.5519
09-KK6-71	09-KK-6	pre-Mz	65.7498	34019.1	2.99229	10.8411	1.97042	3.09112	3.32065	0.243045	2.67285	0.804919	1402.51	33.6897	1430.49	25.4811	1472.35	37.3978	1472.35	37.3978	95.2566
09-KK6-100	09-KK-6	pre-Mz	149.998	54959.6	1.85642	10.8393	0.701368	3.03345	2.16367	0.238471	2.04684	0.946004	1378.74	25.4071	1416.08	16.5242	1472.67	13.31	1472.67	13.31	93.6223
09-KK6-51	09-KK-6	pre-Mz	71.1509	39541.3	3.42224	10.8223	2.45781	2.9823	3.21607	0.234082	2.07419	0.644946	1355.86	25.3625	1403.12	24.46	1475.65	46.6286	1475.65	46.6286	91.8822
09-KK6-87	09-KK-6	pre-Mz	40.0762	15793.6	4.48807	10.7551	4.93328	3.12003	5.96701	0.243373	3.35678	0.562556	1404.21	42.3563	1437.64	45.9136	1487.44	93.4869	1487.44	93.4869	94.4042
09-KK6-98	09-KK-6	pre-Mz	41.1948	30945.6	4.30054	10.6863	3.37144	3.063	4.0964	0.237395	2.32677	0.568005	1373.14	28.7766	1423.49	31.3668	1499.59	63.7662	1499.59	63.7662	91.5677
09-KK6-43	09-KK-6	pre-Mz	206.283	65601	3.80462	10.1128	0.859383	3.11891	3.6654	0.228757	3.56323	0.972126	1327.98	42.7638	1437.37	28.1892	1603.17	16.0303	1603.17	16.0303	82.8344
09-KK6-59	09-KK-6	pre-Mz	119.58	85900.2	2.08759	10.005	1.61659	3.48879	2.47353	0.253158	1.87216	0.756878	1454.74	24.3809	1524.68	19.523	1623.13	30.0767	1623.13	30.0767	89.6255
09-KK6-23	09-KK-6	pre-Mz	163.1	84248.4	1.2532	9.9939	1.27442	3.16559	3.23556	0.22945	2.974	0.919163	1331.62	35.7801	1448.81	24.9715	1625.2	23.7032	1625.2	23.7032	81.9356
09-KK6-18	09-KK-6	pre-Mz	270.587	16708	1.89929	9.85824	0.477649	3.52873	2.51252	0.2523	2.4667	0.981763	1450.32	32.0366	1533.68	19.8809	1650.58	8.85529	1650.58	8.85529	87.8676
09-KK6-95	09-KK-6	pre-Mz	32.4362	15310.8	2.67825	9.85434	4.4704	3.81758	6.49259	0.272844	4.70843	0.7252	1555.22	65.0651	1596.46	52.2867	1651.31	82.9056	1651.31	82.9056	94.1809
09-KK6-4	09-KK-6	pre-Mz	66.7711	56430.6	3.55606	9.62414	1.96402	4.13857	2.41533	0.288876	1.40586	0.582057	1635.91	20.3124	1661.95	19.7547	1695.01	36.2064	1695.01	36.2064	96.5134
09-KK6-14	09-KK-6	pre-Mz	54.7872	37137.4	1.84423	9.30371	1.47076	4.40976	3.39807	0.297557	3.06329	0.901479	1679.18	45.2852	1714.17	28.1326	1757.18	26.9004	1757.18	26.9004	95.5613
09-KK6-15	09-KK-6	pre-Mz	136.928	71531.3	2.5215	9.26705	1.08412	4.61008	2.92403	0.309848	2.71562	0.928727	1739.96	41.4116	1751.09	24.4025	1764.4	19.8114	1764.4	19.8114	98.615
09-KK6-47	09-KK-6	pre-Mz	466.645	134166	5.82821	9.22104	0.141474	4.4334	2.28616	0.296494	2.28178	0.998083	1673.9	33.6388	1718.6	18.9432	1773.49	2.58254	1773.49	2.58254	94.3845
09-KK6-50	09-KK-6	pre-Mz	210.484	233993	3.77639	9.19132	0.658056	4.6988	2.02295	0.31323	1.91293	0.945613	1756.58	29.4132	1767.03	16.9379	1779.38	12.0021	1779.38	12.0021	98.7188
09-KK6-57	09-KK-6	pre-Mz	213.306	700514	3.56363	9.15479	0.611475	4.86761	3.63347	0.323193	3.58165	0.985738	1805.31	56.3964	1796.67	30.6153	1786.64	11.1424	1786.64	11.1424	101.045
09-KK6-36	09-KK-6	pre-Mz	271.004	120657	3.63571	9.14657	0.673534	4.60799	3.72233	0.305681	3.66089	0.983493	1719.42	55.2518	1750.72	31.066	1788.27	12.271	1788.27	12.271	96.1497
09-KK6-21	09-KK-6	pre-Mz	277.087	49529.9	1.74323	8.96793	0.554324	4.53104	5.81096	0.294706	5.78446	0.99544	1665	84.8835	1736.69	48.3723	1824.13	10.0545	1824.13	10.0545	91.2765
09-KK6-38	09-KK-6	pre-Mz	245.408	42247.2	3.95781	8.96224	0.612538	4.55377	1.91148	0.295997	1.81067	0.947265	1671.43	26.659	1740.85	15.9154	1825.28	11.109	1825.28	11.109	91.571
09-KK6-85	09-KK-6	pre-Mz	148.364	125809	3.58356	8.8222	0.731392	4.39	4.09509	0.280892	4.02925	0.983921	1595.86	56.9614	1710.46	33.879	1853.8	13.219	1853.8	13.219	86.0857
09-KK6-99	09-KK-6	pre-Mz	130.382	143714	1.0531	8.57215	1.03298	5.35159	2.77736	0.332714	2.57811	0.928261	1851.52	41.4916	1877.14	23.7652	1905.6	18.5551	1905.6	18.5551	97.1622
09-KK6-2	09-KK-6	pre-Mz	112.986	288858	1.12191	8.56638	1.00011	5.19741	3.15403	0.322911	2.99127	0.948396	1803.93	47.069	1852.19	26.8642	1906.81	17.962	1906.81	17.962	94.6046
09-KK6-93	09-KK-6	pre-Mz	238.169	233190	3.39684	6.00907	0.999906	10.3825	2.76309	0.452489	2.57582	0.932225	2406.31	51.7295	2469.49	25.5965	2521.89	16.7947	2521.89	16.7947	95.4168
09-KK6-75	09-KK-6	pre-Mz	266.067	249205	3.18862	5.75301	0.599134	10.339	2.3414	0.431391	2.26345	0.966707	2311.98	43.9752	2465.6	21.6808	2594.78	9.99016	2594.78	9.99016	89.1014
09-KK6-61	09-KK-6	pre-Mz	42.7664	60738.1	3.96827	5.5654	0.965088	11.543	1.9286	0.465921	1.66976	0.865789	2465.65	34.212	2568.07	18.0233	2649.92	16.0095	2649.92	16.0095	93.0462
09-KK6-68	09-KK-6	pre-Mz	57.2416	82363	2.73925	5.50782	0.831636	11.3321	2.65012	0.452677	2.51625	0.949486	2407.14	50.5476	2550.85	24.7318	2667.16	13.7758	2667.16	13.7758	90.2511
09-KK6-55	09-KK-6	pre-Mz	19.6883	24020.3	1.44486	5.3619	2.173	12.2955	3.29313	0.478148	2.47442	0.751389	2519.19	51.5995	2627.23	30.9325	2711.54	35.8428	2711.54	35.8428	92.9065
09-KK6-82	09-KK-6	pre-Mz	82.5975	160386	2.16535	5.34118	0.730866	13.1557	2.216	0.509625	2.092	0.944046	2655.03	45.5271	2690.89	20.9143	2717.92	12.0489	2717.92	12.0489	97.686
09-KK6-84	09-KK-6	pre-Mz	57.2132	85225.6	4.78959	5.34023	1.03362	12.4865	2.86027	0.483614	2.66697	0.932422	2542.99	56.0436	2641.71	26.8955	2718.22	17.0398	2718.22	17.0398	93.5536
-Spot 95	14SS03	PTr-K	1377	28509	1.3	20.3099	2.2	0.1877	4.2	0.0277	3.6	0.85	175.8	6.2	174.7	6.8	159.2	52.3	175.8	6.2	NA	exclude	high U
-Spot 58	14SS03	PTr-K	1350	31757	2.2	20.2435	1.7	0.2158	2.3	0.0317	1.6	0.69	201.1	3.1	198.4	4.2	166.8	39.5	201.1	3.1	NA	exclude	high U
-Spot 83	14SS03	PTr-K	1264	8333284	2.2	19.7669	1.9	0.2401	3	0.0344	2.3	0.78	218.1	5	218.5	5.9	222.2	42.9	218.1	5	NA	exclude	high U
-Spot 80	14SS03	PTr-K	1535	54926	2.7	19.5664	1.6	0.2659	2.5	0.0377	2	0.77	238.7	4.6	239.4	5.4	245.7	37.1	238.7	4.6	NA	exclude	high U
-Spot 79	14SS03	PTr-K	1926	54037	2	19.7183	1.8	0.2782	2.3	0.0398	1.4	0.62	251.5	3.6	249.2	5.1	227.8	41.7	251.5	3.6	NA	exclude	high U
-Spot 34	14SS03	PTr-K	1772	198560	1.4	19.7334	2.1	0.3259	2.8	0.0466	1.8	0.66	293.9	5.3	286.4	6.9	226.1	47.8	293.9	5.3	NA	exclude	high U
-Spot 21	14SS03	PTr-K	1236	88255	8.8	18.3706	1.4	0.4898	2.9	0.0653	2.6	0.88	407.5	10.1	404.8	9.7	389.1	31.6	407.5	10.1	NA	exclude	high U
-Spot 98	14SS03	PTr-K	1140	78322	3.6	5.7802	1.6	11.1272	2.7	0.4665	2.1	0.79	2468.1	43.6	2533.8	25	2586.9	27.2	2586.9	27.2	95.4	exclude	high U
-Spot 67	14SS03	PTr-K	455	97078	43.9	17.2399	1.9	0.7375	2.5	0.0922	1.6	0.66	568.6	8.8	561	10.7	530	41	568.6	8.8	107.3	exclude	high U/Th
-Spot 69	14SS03	PTr-K	617	168137	25.6	17.0083	1.9	0.7815	3.2	0.0964	2.5	0.8	593.3	14.4	586.3	14.1	559.5	41	593.3	14.4	106	exclude	high U/Th
-Spot 109	14SS03	PTr-K	287	234447	42.2	13.8574	1.5	1.7862	2.2	0.1795	1.6	0.75	1064.4	16.1	1040.4	14.3	990.6	29.6	990.6	29.6	107.4	exclude	high U/Th
-Spot 63	14SS03	PTr-K	1973	55263	33.4	9.6092	1.7	3.4467	2.6	0.2402	2	0.78	1387.8	25.4	1515.1	20.7	1697.9	30.5	1697.9	30.5	81.7	exclude	high U/Th
-Spot 103	14SS03	PTr-K	2063	99364	4.1	13.7272	1.7	0.9024	3.2	0.0898	2.7	0.85	554.6	14.4	653	15.3	1009.7	33.5	554.6	14.4	54.9	exclude	low concordance
-Spot 41	14SS03	PTr-K	1919	80094	1.4	11.5098	1.7	2.1718	3.1	0.1813	2.5	0.83	1074	25.1	1172.1	21.2	1357.9	32.8	1357.9	32.8	79.1	exclude	low concordance
-Spot 30	14SS03	PTr-K	289	27009	3.5	10.8399	8.4	1.793	8.7	0.141	2.4	0.28	850.1	19.2	1042.9	56.8	1472.5	158.9	1472.5	158.9	57.7	exclude	low concordance
-Spot 85	14SS03	PTr-K	1405	279637	22.6	10.1464	1.8	1.2026	2.8	0.0885	2.2	0.76	546.7	11.3	801.8	15.7	1597	34.4	1597	34.4	34.2	exclude	low concordance
-Spot 108	14SS03	PTr-K	1002	56321	3.3	9.6927	1.3	3.1531	2.9	0.2217	2.6	0.9	1290.6	30	1445.8	22	1681.9	23.2	1681.9	23.2	76.7	exclude	low concordance
-Spot 71	14SS03	PTr-K	1223	67625	1.6	6.4917	1.1	5.5406	2.9	0.2609	2.6	0.92	1494.3	35.1	1906.9	24.7	2391.3	19.5	2391.3	19.5	62.5	exclude	low concordance
-Spot 91	14SS03	PTr-K	53	8310	1.4	6.7798	4.2	0.4613	5.6	0.0227	3.7	0.66	144.6	5.3	385.2	18	2317.1	72.8	144.6	5.3	NA	exclude	off concordia
-Spot 89	14SS03	PTr-K	326	8410	0.8	21.6081	3.3	0.1769	4	0.0277	2.1	0.54	176.3	3.7	165.4	6.1	12.2	80.4	176.3	3.7	NA	exclude	off concordia
-Spot 26	14SS03	PTr-K	318	9359	1.5	21.2077	2.7	0.1994	3.7	0.0307	2.5	0.67	194.7	4.8	184.6	6.2	56.9	65.2	194.7	4.8	NA	exclude	off concordia
-Spot 23	14SS03	PTr-K	3242	93602	2.6	20.0534	1.1	0.2704	2	0.0393	1.6	0.82	248.7	4	243	4.3	188.8	26.2	248.7	4	NA	exclude	off concordia
-Spot 96	14SS03	PTr-K	2031	219611	3.2	16.6392	2	0.3273	2.9	0.0395	2.2	0.74	249.7	5.4	287.5	7.4	607.1	42.4	249.7	5.4	NA	exclude	off concordia
-Spot 59	14SS03	PTr-K	607	43383	2	12.8148	2.1	0.5501	2.7	0.0511	1.6	0.61	321.5	5.2	445.1	9.7	1147.8	42.1	321.5	5.2	NA	exclude	off concordia
-Spot 107	14SS03	PTr-K	3656	194891	2.1	19.2768	1.3	0.2716	3	0.038	2.7	0.9	240.3	6.3	244	6.5	280	30.2	240.3	6.3	NA	exclude	very high U
-Spot 43	14SS03	PTr-K	171	10895	1.6	20.4738	5.3	0.181	5.7	0.0269	2	0.34	171	3.3	168.9	8.8	140.3	125.4	171	3.3	NA
-Spot 53	14SS03	PTr-K	349	12222	2.2	20.692	2.5	0.1803	3.5	0.0271	2.5	0.71	172.1	4.3	168.3	5.5	115.4	58.9	172.1	4.3	NA
-Spot 15	14SS03	PTr-K	997	99397	1.1	20.1336	1.5	0.1907	2.2	0.0278	1.7	0.74	177	2.9	177.2	3.6	179.5	35.3	177	2.9	NA
-Spot 18	14SS03	PTr-K	435	33114	1.2	19.6888	2.9	0.1978	3.2	0.0282	1.4	0.45	179.6	2.6	183.3	5.4	231.3	66.8	179.6	2.6	NA
-Spot 44	14SS03	PTr-K	626	109009	1.5	20.2494	2.7	0.1999	3.4	0.0294	2	0.58	186.5	3.6	185	5.7	166.1	64.2	186.5	3.6	NA
-Spot 39	14SS03	PTr-K	653	49676	2.1	20.0513	1.7	0.2148	2.5	0.0312	1.8	0.74	198.3	3.6	197.6	4.4	189	38.5	198.3	3.6	NA
-Spot 101	14SS03	PTr-K	661	162327	3.8	19.6156	1.5	0.2232	3.1	0.0318	2.7	0.87	201.5	5.4	204.6	5.8	239.9	35.1	201.5	5.4	NA
-Spot 13	14SS03	PTr-K	143	47641	0.7	20.1955	4.7	0.2374	5.4	0.0348	2.6	0.49	220.4	5.6	216.3	10.4	172.3	109.2	220.4	5.6	NA
-Spot 35	14SS03	PTr-K	533	35234	3.4	19.949	2.8	0.2537	4	0.0367	2.9	0.71	232.4	6.5	229.6	8.2	200.9	65.3	232.4	6.5	NA
-Spot 88	14SS03	PTr-K	761	49270	3.2	19.3591	2.1	0.275	2.8	0.0386	1.8	0.66	244.2	4.4	246.7	6.1	270.2	48.3	244.2	4.4	NA
-Spot 9	14SS03	PTr-K	136	37761	1.4	19.6875	4.8	0.281	5.6	0.0401	2.9	0.52	253.6	7.3	251.5	12.4	231.5	109.8	253.6	7.3	NA
-Spot 22	14SS03	PTr-K	380	20693	2.3	20.2562	2.4	0.2771	4.9	0.0407	4.3	0.87	257.2	10.8	248.3	10.8	165.3	56.4	257.2	10.8	NA
-Spot 25	14SS03	PTr-K	573	160437	5.2	19.651	2.9	0.289	3.4	0.0412	1.8	0.52	260.2	4.5	257.7	7.7	235.8	67.3	260.2	4.5	NA
-Spot 29	14SS03	PTr-K	633	27255	1.4	19.4457	1.5	0.2954	2.2	0.0417	1.7	0.75	263.2	4.3	262.8	5.2	259.9	33.8	263.2	4.3	NA
-Spot 50	14SS03	PTr-K	313	64253	4	19.4199	3.1	0.2963	3.5	0.0417	1.6	0.46	263.6	4.1	263.5	8	263	70.3	263.6	4.1	NA
-Spot 33	14SS03	PTr-K	659	51300	1.8	19.4144	2.2	0.3062	3.4	0.0431	2.6	0.77	272.1	6.9	271.2	8	263.7	49.7	272.1	6.9	NA
-Spot 102	14SS03	PTr-K	163	21729	3.3	20.0934	3.9	0.2961	4.6	0.0432	2.5	0.53	272.4	6.6	263.4	10.7	184.1	91.1	272.4	6.6	NA
-Spot 81	14SS03	PTr-K	906	180470	1.8	19.7584	2	0.3018	3.2	0.0432	2.5	0.79	272.9	6.7	267.8	7.5	223.2	45.8	272.9	6.7	NA
-Spot 104	14SS03	PTr-K	354	26291	2.4	19.8736	2.3	0.3016	3	0.0435	1.9	0.63	274.3	5.1	267.6	7.1	209.7	54	274.3	5.1	NA
-Spot 56	14SS03	PTr-K	307	97974	2.2	18.1695	1.9	0.4857	2.5	0.064	1.6	0.64	399.9	6.2	402	8.4	413.7	43.4	399.9	6.2	NA
-Spot 5	14SS03	PTr-K	393	40125	1.3	18.3164	2.1	0.5283	2.8	0.0702	1.8	0.65	437.3	7.6	430.7	9.8	395.7	47.5	437.3	7.6	NA
-Spot 70	14SS03	PTr-K	487	63406	2.3	17.8934	2	0.5577	2.8	0.0724	1.9	0.7	450.4	8.4	450	10	447.8	44	450.4	8.4	NA
-Spot 20	14SS03	PTr-K	540	116940	3.6	17.2236	1.4	0.6889	2.1	0.0861	1.6	0.75	532.2	8.3	532.2	8.9	532	30.8	532.2	8.3	100
-Spot 54	14SS03	PTr-K	162	31309	1.5	16.6567	2.4	0.7793	3.2	0.0941	2.2	0.67	580	12.1	585.1	14.4	604.9	51.8	580	12.1	95.9
-Spot 52	14SS03	PTr-K	355	217245	3	16.6697	2.1	0.8027	2.8	0.0971	1.9	0.66	597.1	10.7	598.4	12.8	603.2	46	597.1	10.7	99
-Spot 105	14SS03	PTr-K	798	119377	7.2	14.3026	2	1.2497	3.1	0.1296	2.4	0.78	785.8	17.9	823.3	17.6	925.9	40.5	785.8	17.9	84.9
-Spot 24	14SS03	PTr-K	450	83587	2.2	13.8585	1.5	1.3189	3.6	0.1326	3.2	0.9	802.5	24.2	854	20.5	990.4	31.3	802.5	24.2	81
-Spot 42	14SS03	PTr-K	193	48441	2.2	14.2467	2	1.4785	3.2	0.1528	2.5	0.79	916.5	21.4	921.6	19.2	934	40.1	934	40.1	98.1
-Spot 106	14SS03	PTr-K	272	94288	3.2	13.931	2.2	1.6953	4.3	0.1713	3.7	0.85	1019.2	34.7	1006.8	27.6	979.8	45.8	979.8	45.8	104
-Spot 27	14SS03	PTr-K	88	173054	3	13.8693	2.7	1.6405	3.3	0.165	1.9	0.57	984.6	17.3	985.9	21	988.8	55.6	988.8	55.6	99.6
-Spot 4	14SS03	PTr-K	108	20288	4.8	13.7729	2.5	1.5898	3.7	0.1588	2.7	0.74	950.1	24.3	966.2	23.2	1003	51.1	1003	51.1	94.7
-Spot 45	14SS03	PTr-K	207	60719	1.9	13.5923	1.7	1.7931	2.9	0.1768	2.4	0.82	1049.3	23.2	1042.9	19.1	1029.7	33.8	1029.7	33.8	101.9
-Spot 76	14SS03	PTr-K	237	104694	3.7	13.5698	1.8	1.7615	2.8	0.1734	2.1	0.76	1030.6	20.4	1031.4	18.2	1033.1	37.1	1033.1	37.1	99.8
-Spot 68	14SS03	PTr-K	323	53495	2.4	13.5429	1.1	1.768	2.4	0.1737	2.1	0.88	1032.2	19.8	1033.8	15.4	1037.1	23.1	1037.1	23.1	99.5
-Spot 49	14SS03	PTr-K	112	36478	1.1	13.5003	1.7	1.8131	3.2	0.1775	2.7	0.84	1053.4	26.6	1050.2	21.2	1043.4	35.3	1043.4	35.3	101
-Spot 60	14SS03	PTr-K	234	159508	3	13.45	1.7	1.8141	2.6	0.177	2	0.75	1050.4	19.2	1050.6	17.2	1051	35	1051	35	99.9
-Spot 90	14SS03	PTr-K	641	70214	5.3	13.3565	1.3	1.8132	2.9	0.1756	2.6	0.89	1043.2	25.2	1050.2	19.2	1065	26.6	1065	26.6	97.9
-Spot 86	14SS03	PTr-K	314	61269	2.2	13.3387	1.4	1.8784	2.7	0.1817	2.3	0.85	1076.4	23	1073.5	18.1	1067.7	29.1	1067.7	29.1	100.8
-Spot 14	14SS03	PTr-K	88	59579	1.1	13.2505	2.6	1.8075	3.7	0.1737	2.7	0.72	1032.5	25.4	1048.2	24.3	1081	51.9	1081	51.9	95.5
-Spot 82	14SS03	PTr-K	157	85269	2.1	13.2287	2.3	1.9007	3.6	0.1824	2.8	0.77	1079.8	27.5	1081.3	23.8	1084.3	45.7	1084.3	45.7	99.6
-Spot 51	14SS03	PTr-K	95	58710	3.5	12.7226	2.7	1.9119	3.8	0.1764	2.7	0.71	1047.4	25.8	1085.2	25.3	1162.1	53.2	1162.1	53.2	90.1
-Spot 77	14SS03	PTr-K	895	85198	1.8	12.4963	1.8	2.1168	3.8	0.1918	3.3	0.88	1131.4	34.6	1154.3	26	1197.6	34.6	1197.6	34.6	94.5
-Spot 55	14SS03	PTr-K	439	89280	2.2	12.3901	1.6	2.2131	2.6	0.1989	2	0.78	1169.2	21.5	1185.2	18.1	1214.4	32.1	1214.4	32.1	96.3
-Spot 97	14SS03	PTr-K	931	58081	2	12.3269	1.4	2.1045	3	0.1882	2.7	0.88	1111.3	27.3	1150.3	20.9	1224.4	28.4	1224.4	28.4	90.8
-Spot 73	14SS03	PTr-K	324	103684	3.7	12.2492	1.1	2.2	2	0.1954	1.6	0.82	1150.8	17	1181	13.8	1236.9	22.4	1236.9	22.4	93
-Spot 3	14SS03	PTr-K	315	54680	2.3	12.2325	1.5	2.5499	2.4	0.2262	1.9	0.79	1314.7	22.6	1286.4	17.5	1239.5	28.7	1239.5	28.7	106.1
-Spot 19	14SS03	PTr-K	256	36106	3.5	11.7821	1.6	2.7261	2.8	0.2329	2.3	0.82	1349.9	27.6	1335.6	20.6	1312.7	31.1	1312.7	31.1	102.8
-Spot 37	14SS03	PTr-K	422	65318	4.3	11.7709	1.8	2.743	3.6	0.2342	3.2	0.87	1356.3	38.6	1340.2	27.1	1314.5	35.1	1314.5	35.1	103.2
-Spot 78	14SS03	PTr-K	128	39556	2.5	11.658	2.4	2.6552	3	0.2245	1.9	0.62	1305.6	22.1	1316.1	22.2	1333.2	45.6	1333.2	45.6	97.9
-Spot 94	14SS03	PTr-K	369	48963	2.1	11.5457	1.4	2.7223	2.3	0.228	1.8	0.79	1323.8	21.9	1334.6	17.2	1351.9	27.5	1351.9	27.5	97.9
-Spot 10	14SS03	PTr-K	109	27489	2.1	11.4237	2.2	2.451	4	0.2031	3.4	0.84	1191.8	36.7	1257.7	29	1372.3	42.1	1372.3	42.1	86.8
-Spot 66	14SS03	PTr-K	274	49312	1.5	11.2709	1.3	3.0019	2.3	0.2454	1.9	0.82	1414.6	24.4	1408.1	17.9	1398.2	25.8	1398.2	25.8	101.2
-Spot 32	14SS03	PTr-K	261	30120	2.2	11.2615	1.2	2.5182	2.3	0.2057	1.9	0.85	1205.8	21.3	1277.3	16.5	1399.8	22.7	1399.8	22.7	86.1
-Spot 65	14SS03	PTr-K	514	228602	1.9	11.2006	1.6	3.0277	2.6	0.246	2.1	0.8	1417.6	26.7	1414.6	20.1	1410.2	30.4	1410.2	30.4	100.5
-Spot 75	14SS03	PTr-K	255	229984	1.9	11.1895	1.5	2.8462	3.4	0.231	3.1	0.9	1339.7	37.2	1367.8	25.6	1412.1	28.4	1412.1	28.4	94.9
-Spot 47	14SS03	PTr-K	413	99542	1.3	11.166	1.1	3.1398	2.7	0.2543	2.4	0.91	1460.5	31.7	1442.5	20.5	1416.1	20.8	1416.1	20.8	103.1
-Spot 165	14SS03	PTr-K	436	88362	2.3	11.1197	1.6	2.9294	2.4	0.2363	1.8	0.75	1367.2	22.3	1389.5	18.3	1424	30.5	1424	30.5	96
-Spot 61	14SS03	PTr-K	408	124844	1.4	10.942	1.9	3.2365	2.8	0.2568	2.1	0.74	1473.7	27.2	1466	21.7	1454.7	35.7	1454.7	35.7	101.3
-Spot 28	14SS03	PTr-K	307	110546	3.5	10.3452	1.6	3.8423	2.4	0.2883	1.8	0.76	1633	26.7	1601.6	19.6	1560.7	29.7	1560.7	29.7	104.6
-Spot 31	14SS03	PTr-K	307	115620	1.9	10.0084	1.5	3.6307	2.2	0.2635	1.6	0.74	1507.9	21.5	1556.3	17.3	1622.5	27.4	1622.5	27.4	92.9
-Spot 48	14SS03	PTr-K	209	35439	1.4	9.7403	1.4	4.2605	2.3	0.301	1.8	0.79	1696.2	26.8	1685.8	18.7	1672.9	25.8	1672.9	25.8	101.4
-Spot 17	14SS03	PTr-K	530	121896	3.1	9.6348	1.6	4.3126	2.7	0.3014	2.2	0.81	1698	32.1	1695.8	22	1693	29.2	1693	29.2	100.3
-Spot 74	14SS03	PTr-K	314	60197	3.3	9.5992	1.6	4.3083	2.5	0.2999	1.9	0.77	1691	28.1	1695	20.2	1699.8	28.9	1699.8	28.9	99.5
-Spot 87	14SS03	PTr-K	138	28458	1.7	9.4891	2.2	4.4507	3	0.3063	2.1	0.68	1722.5	31.2	1721.8	25.1	1721	40.8	1721	40.8	100.1
-Spot 57	14SS03	PTr-K	948	256086	4.1	9.4093	0.7	4.4731	1.9	0.3053	1.8	0.92	1717.3	26.8	1726	15.9	1736.5	13.4	1736.5	13.4	98.9
-Spot 38	14SS03	PTr-K	364	168911	2	9.3212	1.9	4.2651	2.7	0.2883	1.9	0.69	1633.2	26.8	1686.6	22.1	1753.7	35.4	1753.7	35.4	93.1
-Spot 100	14SS03	PTr-K	88	45551	1.3	9.3016	1.8	4.5626	2.7	0.3078	2	0.74	1729.9	30.3	1742.5	22.5	1757.6	33.4	1757.6	33.4	98.4
-Spot 40	14SS03	PTr-K	400	86380	3.6	9.2164	1.7	4.6805	3	0.3129	2.5	0.83	1754.8	38.4	1763.8	25.2	1774.4	30.5	1774.4	30.5	98.9
-Spot 84	14SS03	PTr-K	587	156520	4	9.1564	1	4.8454	2.2	0.3218	1.9	0.87	1798.4	29.5	1792.8	18.1	1786.3	19.1	1786.3	19.1	100.7
-Spot 110	14SS03	PTr-K	692	220097	3.2	9.1337	1.1	4.3815	2.3	0.2903	2	0.88	1642.8	29.1	1708.9	18.9	1790.8	20.1	1790.8	20.1	91.7
-Spot 62	14SS03	PTr-K	985	58971	4.8	8.9541	1.7	4.4904	2.4	0.2916	1.8	0.73	1649.6	25.9	1729.2	20.3	1826.9	30.5	1826.9	30.5	90.3
-Spot 93	14SS03	PTr-K	387	192191	1.7	8.8231	1.4	5.2862	2.4	0.3383	1.9	0.79	1878.3	30.4	1866.6	20.1	1853.6	26	1853.6	26	101.3
-Spot 92	14SS03	PTr-K	150	65190	1	8.755	1.3	5.3936	2.1	0.3425	1.6	0.78	1898.6	26.8	1883.8	17.9	1867.6	23.7	1867.6	23.7	101.7
-Spot 72	14SS03	PTr-K	199	53144	2	8.7308	1.1	5.0025	2.2	0.3168	1.9	0.86	1773.9	29.4	1819.7	18.6	1872.6	20.2	1872.6	20.2	94.7
-Spot 12	14SS03	PTr-K	86	70207	2.2	8.6628	1.6	5.3109	2.4	0.3337	1.7	0.71	1856.2	27.1	1870.6	20.1	1886.7	29.7	1886.7	29.7	98.4
-Spot 8	14SS03	PTr-K	68	90097	0.9	8.099	1.8	6.2087	2.9	0.3647	2.4	0.8	2004.4	40.7	2005.7	25.8	2007	31.1	2007	31.1	99.9
-Spot 99	14SS03	PTr-K	255	597242	2.7	6.1875	1.7	10.288	2.9	0.4617	2.4	0.82	2447	48.7	2461	27	2472.6	28.1	2472.6	28.1	99
-Spot 11	14SS03	PTr-K	218	51536	2.7	5.8157	2.1	11.2012	2.6	0.4725	1.6	0.62	2494.3	33.3	2540	24.3	2576.7	34.4	2576.7	34.4	96.8
-Spot 7	14SS03	PTr-K	322	136721	2.5	5.8056	1.2	11.6901	2.2	0.4922	1.8	0.85	2580.3	39	2579.9	20.3	2579.6	19.4	2579.6	19.4	100
-Spot 2	14SS03	PTr-K	282	906676	0.7	5.7205	1.6	11.6712	2.8	0.4842	2.3	0.82	2545.6	48.8	2578.4	26.5	2604.2	27	2604.2	27	97.8
-Spot 64	14SS03	PTr-K	325	105654	2.4	5.7193	1.4	11.6401	2	0.4828	1.5	0.73	2539.6	31.1	2575.9	18.9	2604.6	23	2604.6	23	97.5
-Spot 36	14SS03	PTr-K	135	88088	1.1	5.598	1.5	12.3847	2.4	0.5028	1.9	0.78	2625.9	40.9	2634	22.7	2640.2	24.9	2640.2	24.9	99.5
-Spot 46	14SS03	PTr-K	280	187898	2	5.2962	1.4	12.8675	2.3	0.4943	1.8	0.8	2589.1	38.4	2670	21.3	2731.8	22.4	2731.8	22.4	94.8
-Spot 1	14SS03	PTr-K	391	212867	1.5	4.4666	1.3	14.8464	3.4	0.4809	3.1	0.93	2531.4	65.9	2805.4	32.2	3008.8	20.2	3008.8	20.2	84.1
1-96-5	1-96	pre-Mz	1360	99225	3.4	18.6884	0.5	0.4186	1.5	0.0567	1.4	0.93	355.7	4.8	355	4.5	350.4	12.1	355.7	4.8	NA		high U *included
1-96-7	1-96	pre-Mz	251	15469	3.2	17.5807	3.8	0.5399	3.8	0.0688	0.7	0.18	429.1	2.9	438.3	13.7	486.9	83.5	429.1	2.9	NA
1-96-6	1-96	pre-Mz	791	35796	3	14.7926	0.8	1.219	2	0.1308	1.8	0.91	792.3	13.4	809.3	11	856.3	16.7	792.3	13.4	92.526
1-96-2	1-96	pre-Mz	382	29079	3.6	11.6213	0.7	2.2866	1	0.1927	0.7	0.69	1136.1	7.4	1208.1	7.3	1339.3	14.4	1339.3	14.4	84.8279
1-96-4	1-96	pre-Mz	103	54839	1	8.8836	1.1	5.085	1.7	0.3276	1.3	0.77	1826.9	21	1833.6	14.5	1841.2	19.7	1841.2	19.7	99.2233
2-68-39	2-68	PTr-K	674.267	8632.9	1.57074	21.5638	7.28767	0.0892064	7.74918	0.0139515	2.63431	0.339947	89.3155	2.33662	86.7638	6.44432	17.0827	175.29	89.3155	2.33662	NA	exclude	contamination
2-68-66	2-68	PTr-K	839.783	24286.3	1.69075	20.8361	4.36296	0.0925512	4.92679	0.0139861	2.28864	0.464529	89.5355	2.03498	89.8771	4.23777	98.9765	103.248	89.5355	2.03498	NA	exclude	contamination
2-68-36	2-68	PTr-K	546.565	8719.78	1.96124	20.9931	8.09837	0.0935951	8.34929	0.0142505	2.03151	0.243315	91.216	1.84002	90.8469	7.25577	81.1384	192.509	91.216	1.84002	NA	exclude	contamination
2-68-38	2-68	PTr-K	600.04	8493.62	1.6339	21.068	4.83138	0.0975396	6.75097	0.014904	4.71522	0.698451	95.3687	4.46374	94.5027	6.09203	72.6992	114.904	95.3687	4.46374	NA	exclude	contamination
2-68-28	2-68	PTr-K	1290.99	28584.9	3.25377	20.4254	1.55734	0.128151	2.58819	0.0189842	2.06723	0.798715	121.233	2.48274	122.435	2.98527	145.876	36.5068	121.233	2.48274	NA	exclude	high U
2-68-87	2-68	PTr-K	538.956	3028.98	5.44486	20.0059	6.40738	0.145362	6.53204	0.0210916	1.27005	0.194434	134.551	1.69116	137.809	8.41779	194.325	149.062	134.551	1.69116	NA		isolated young age
2-68-88	2-68	PTr-K	475.585	2720.52	2.71384	20.5367	9.00197	0.151814	10.5825	0.0226122	5.56368	0.525742	144.144	7.93072	143.513	14.1637	133.099	211.982	144.144	7.93072	NA		isolated young age
2-68-78	2-68	PTr-K	667.574	4261.14	1.45595	19.3382	7.89856	0.172168	7.93418	0.0241473	0.750969	0.0946498	153.814	1.14142	161.299	11.8336	272.631	181.263	153.814	1.14142	NA
2-68-62	2-68	PTr-K	514.817	6898.1	1.8236	19.5919	9.35395	0.170732	9.97993	0.0242598	3.4789	0.34859	154.522	5.31176	160.054	14.779	242.687	215.949	154.522	5.31176	NA
2-68-6	2-68	PTr-K	285.096	9470.65	1.06097	20.6717	4.83309	0.167196	5.19091	0.0250669	1.89389	0.364847	159.6	2.98553	156.983	7.5503	117.662	114.026	159.6	2.98553	NA
2-68-77	2-68	PTr-K	390.744	10782.5	1.74609	20.0522	3.62979	0.173345	3.90287	0.02521	1.43421	0.367477	160.499	2.27348	162.318	5.85469	188.905	84.4883	160.499	2.27348	NA
2-68-37	2-68	PTr-K	180.687	5559.14	1.91437	22.2905	21.7621	0.156627	21.9607	0.0253212	2.94697	0.134193	161.199	4.69157	147.746	30.2049	-63.1102	536.289	161.199	4.69157	NA
2-68-61	2-68	PTr-K	430.043	18403.6	2.25062	21.15	4.94039	0.166113	5.07981	0.0254807	1.18197	0.232681	162.202	1.89326	156.04	7.34764	63.4875	117.704	162.202	1.89326	NA
2-68-94	2-68	PTr-K	346.783	19474.1	2.2667	19.5527	10.9913	0.179696	11.8147	0.0254827	4.33359	0.366795	162.214	6.94198	167.799	18.2755	247.315	253.708	162.214	6.94198	NA
2-68-55	2-68	PTr-K	340.382	21452.1	2.4027	20.7359	6.94351	0.170517	7.05042	0.0256442	1.22316	0.173487	163.229	1.97149	159.868	10.4292	110.339	164.1	163.229	1.97149	NA
2-68-95	2-68	PTr-K	382.151	990.924	1.89431	18.3961	13.919	0.193213	13.9525	0.0257787	0.966114	0.069243	164.074	1.56514	179.367	22.9442	385.941	313.982	164.074	1.56514	NA
2-68-30	2-68	PTr-K	325.104	4679.32	1.55771	18.6588	15.6019	0.191124	15.6852	0.025864	1.61414	0.102908	164.611	2.6234	177.588	25.5605	354.035	354.317	164.611	2.6234	NA
2-68-85	2-68	PTr-K	262.99	3901.83	1.71618	18.9161	9.34258	0.191653	9.69801	0.0262933	2.60144	0.268244	167.307	4.2964	178.038	15.8384	323.032	212.59	167.307	4.2964	NA
2-68-53	2-68	PTr-K	473.158	7067.67	1.54678	19.4438	4.9375	0.186924	5.25358	0.02636	1.79477	0.341628	167.726	2.97147	174.002	8.40113	260.188	113.458	167.726	2.97147	NA
2-68-12	2-68	PTr-K	414.8	3028.64	2.03088	20.5695	9.56003	0.176769	9.69609	0.0263711	1.61868	0.166942	167.796	2.68104	165.277	14.7901	129.361	225.329	167.796	2.68104	NA
2-68-86	2-68	PTr-K	489.033	19534.3	1.1677	19.2793	3.24809	0.188755	3.40487	0.026393	1.02128	0.299947	167.934	1.69292	175.566	5.48959	279.661	74.3664	167.934	1.69292	NA
2-68-40	2-68	PTr-K	546.327	15727.5	0.844307	20.351	4.34686	0.179596	4.47674	0.0265082	1.07052	0.239129	168.657	1.78209	167.713	6.92088	154.376	101.824	168.657	1.78209	NA
2-68-89	2-68	PTr-K	286.196	11505.3	2.02008	20.5145	12.9324	0.178185	12.973	0.0265113	1.02614	0.079098	168.677	1.70842	166.498	19.9244	135.625	304.967	168.677	1.70842	NA
2-68-79	2-68	PTr-K	409.782	22065.7	1.67944	21.1046	6.15562	0.173204	6.17443	0.0265115	0.481626	0.0780034	168.678	0.801861	162.196	9.256	68.5917	146.564	168.678	0.801861	NA
2-68-51	2-68	PTr-K	527.186	18832.9	1.44256	20.7122	4.69818	0.176716	4.8014	0.0265461	0.990258	0.206243	168.895	1.65078	165.231	7.32166	113.072	110.906	168.895	1.65078	NA
2-68-54	2-68	PTr-K	299.032	10392.2	2.08065	19.6669	5.59106	0.186316	5.7304	0.0265757	1.256	0.219182	169.081	2.09605	173.481	9.13852	233.917	129.104	169.081	2.09605	NA
2-68-2	2-68	PTr-K	478.524	9060.21	0.845805	20.8654	7.7708	0.175765	8.13195	0.0265985	2.39652	0.294704	169.224	4.00272	164.41	12.3441	95.6243	184.203	169.224	4.00272	NA
2-68-99	2-68	PTr-K	483.757	14069	1.35276	19.8976	6.07591	0.184706	6.17426	0.0266552	1.09763	0.177774	169.58	1.83708	172.102	9.7746	206.908	141.039	169.58	1.83708	NA
2-68-35	2-68	PTr-K	567.642	20405.1	0.937983	19.8997	3.85851	0.18504	4.70044	0.0267061	2.68441	0.571097	169.9	4.50123	172.388	7.45263	206.659	89.5324	169.9	4.50123	NA
2-68-60	2-68	PTr-K	771.357	36048.3	1.18101	21.0895	2.26618	0.175552	2.54777	0.0268517	1.16429	0.456983	170.814	1.96264	164.226	3.86328	70.2938	53.9113	170.814	1.96264	NA
2-68-82	2-68	PTr-K	334.069	20796.3	2.03139	21.1189	5.46837	0.176153	5.81729	0.0269812	1.9844	0.341121	171.627	3.36083	164.745	8.84686	66.9363	130.225	171.627	3.36083	NA
2-68-98	2-68	PTr-K	421.972	18968	1.67247	20.1876	3.86069	0.184469	3.90967	0.027009	0.616971	0.157806	171.801	1.04596	171.899	6.18268	173.225	90.1282	171.801	1.04596	NA
2-68-96	2-68	PTr-K	416.165	15411.9	1.81727	19.5994	5.55541	0.190227	5.82815	0.0270404	1.76203	0.302331	171.999	2.99059	176.823	9.45836	241.827	128.096	171.999	2.99059	NA
2-68-8	2-68	PTr-K	370.698	13742.3	1.46882	21.1504	5.23059	0.176338	5.32367	0.0270498	0.991162	0.18618	172.057	1.68281	164.905	8.10335	63.4383	124.628	172.057	1.68281	NA
2-68-7	2-68	PTr-K	556.919	25282.5	1.52475	20.3245	2.51879	0.183607	2.97444	0.027065	1.58208	0.531891	172.153	2.68754	171.159	4.6851	157.437	58.9773	172.153	2.68754	NA
2-68-92	2-68	PTr-K	266.238	15236.4	2.38854	19.9538	7.40729	0.187745	8.32178	0.0271701	3.79264	0.455748	172.812	6.46708	174.703	13.3572	200.393	172.185	172.812	6.46708	NA
2-68-1	2-68	PTr-K	522.244	18168.8	1.58946	19.9214	3.3495	0.188317	3.57704	0.0272087	1.25541	0.350963	173.055	2.14364	175.192	5.75592	204.118	77.7437	173.055	2.14364	NA
2-68-90	2-68	PTr-K	425.809	19033.3	1.32332	20.2479	5.53617	0.185812	6.40966	0.0272868	3.23026	0.503967	173.545	5.53115	173.049	10.1985	166.259	129.448	173.545	5.53115	NA
2-68-84	2-68	PTr-K	915.788	48166.4	1.12156	20.104	2.60454	0.187466	2.66577	0.027334	0.568102	0.21311	173.841	0.974396	174.464	4.27323	182.901	60.6832	173.841	0.974396	NA
2-68-9	2-68	PTr-K	411.077	12700.5	1.5129	19.6416	2.90478	0.192043	3.24006	0.0273572	1.43536	0.443005	173.987	2.46394	178.371	5.3002	236.856	67.0178	173.987	2.46394	NA
2-68-82	2-68	PTr-K	566.688	28755.6	1.34751	19.9987	2.95064	0.188724	2.99179	0.0273734	0.49448	0.165279	174.088	0.849311	175.54	4.82293	195.165	68.588	174.088	0.849311	NA
2-68-57	2-68	PTr-K	440.919	13171.7	1.4528	20.7666	6.1377	0.182124	6.32182	0.0274304	1.51464	0.239589	174.446	2.60679	169.886	9.88985	106.873	145.096	174.446	2.60679	NA
2-68-16	2-68	PTr-K	361.493	15135.4	1.93939	19.863	4.07323	0.190626	4.21854	0.0274615	1.09765	0.260197	174.641	1.89122	177.163	6.85811	210.926	94.4235	174.641	1.89122	NA
2-68-93	2-68	PTr-K	679.71	13056.7	0.854419	19.8655	4.53758	0.190608	4.66879	0.0274625	1.09908	0.235409	174.648	1.89374	177.148	7.58954	210.646	105.193	174.648	1.89374	NA
2-68-10	2-68	PTr-K	331.176	13832.9	1.95494	20.5314	7.04313	0.184547	7.1543	0.0274805	1.25631	0.175602	174.76	2.16604	171.966	11.318	133.713	165.736	174.76	2.16604	NA
2-68-17	2-68	PTr-K	359.698	18327.1	1.26692	20.5017	5.36153	0.185193	5.65769	0.0275368	1.80649	0.319298	175.113	3.12082	172.519	8.97667	137.118	126.026	175.113	3.12082	NA
2-68-34	2-68	PTr-K	364.983	10219.6	0.837586	20.6967	10.8445	0.18368	11.7093	0.0275715	4.41642	0.377173	175.331	7.63903	171.222	18.4517	114.796	256.44	175.331	7.63903	NA
2-68-69	2-68	PTr-K	504.338	17201.9	0.936611	19.2386	2.74992	0.197677	3.14228	0.0275822	1.52047	0.483875	175.399	2.63093	183.159	5.26617	284.466	62.8785	175.399	2.63093	NA
2-68-19	2-68	PTr-K	516.966	25544.2	1.13942	19.6943	3.76844	0.19315	4.44641	0.0275889	2.35996	0.530757	175.44	4.08449	179.313	7.3088	230.655	87.0521	175.44	4.08449	NA
2-68-67	2-68	PTr-K	332.99	9045.12	1.81189	19.9545	8.68331	0.190693	8.72992	0.0275977	0.900964	0.103204	175.496	1.55982	177.22	14.1972	200.265	201.966	175.496	1.55982	NA
2-68-64	2-68	PTr-K	347.766	10121.4	1.63356	20.1312	8.36027	0.189059	8.4337	0.0276036	1.11046	0.131669	175.533	1.92292	175.826	13.6166	179.75	195.137	175.533	1.92292	NA
2-68-74	2-68	PTr-K	287.265	11661.6	1.4442	21.054	6.43401	0.180902	6.44272	0.0276235	0.334821	0.0519689	175.657	0.580197	168.837	10.0217	74.3029	153.041	175.657	0.580197	NA
2-68-56	2-68	PTr-K	242.838	8540.44	2.17233	20.7956	7.9298	0.184098	8.24656	0.0277664	2.26363	0.274494	176.554	3.9423	171.581	13.0193	103.534	187.701	176.554	3.9423	NA
2-68-48	2-68	PTr-K	291.637	9221.07	2.16417	18.7387	8.95052	0.204436	9.56653	0.027784	3.3774	0.353043	176.664	5.88565	188.873	16.4891	344.349	202.869	176.664	5.88565	NA
2-68-5	2-68	PTr-K	333.837	11943.7	2.48305	21.5602	8.08568	0.177907	8.24456	0.0278191	1.61072	0.195368	176.884	2.81039	166.258	12.6445	17.4928	194.503	176.884	2.81039	NA
2-68-91	2-68	PTr-K	322.566	1283.95	1.53462	19.5724	11.8502	0.196205	11.9049	0.0278518	1.14057	0.0958064	177.089	1.99233	181.91	19.8297	244.978	273.78	177.089	1.99233	NA
2-68-50	2-68	PTr-K	618.926	18620.6	0.767557	20.7492	2.79543	0.185413	3.02764	0.0279023	1.16284	0.384073	177.406	2.03481	172.707	4.80848	108.828	66.029	177.406	2.03481	NA
2-68-23	2-68	PTr-K	400.363	11806.3	1.42828	21.4633	8.16464	0.179651	8.40199	0.0279657	1.98296	0.23601	177.804	3.47759	167.76	12.9931	28.307	196.008	177.804	3.47759	NA
2-68-75	2-68	PTr-K	329.059	19211	2.00913	19.553	5.12054	0.197236	5.99509	0.0279705	3.11788	0.520072	177.834	5.46886	182.785	10.0288	247.295	117.944	177.834	5.46886	NA
2-68-71	2-68	PTr-K	163.765	6257.98	2.08567	18.9613	11.4503	0.203471	11.5145	0.0279813	1.21415	0.105445	177.902	2.13045	188.059	19.7695	317.567	261.065	177.902	2.13045	NA
2-68-47	2-68	PTr-K	312.064	13566.2	1.97978	20.4563	10.8918	0.188788	10.955	0.0280092	1.17502	0.107258	178.076	2.0638	175.595	17.6668	142.297	256.259	178.076	2.0638	NA
2-68-43	2-68	PTr-K	396.763	12116.7	1.51089	20.7059	6.8635	0.186634	6.89468	0.0280275	0.654921	0.0949894	178.191	1.15103	173.753	11.0112	113.758	162.103	178.191	1.15103	NA
2-68-42	2-68	PTr-K	543.498	12435.8	0.868314	20.6631	3.73032	0.187039	3.9573	0.0280302	1.32095	0.333802	178.208	2.3218	174.099	6.33142	118.664	87.9429	178.208	2.3218	NA
2-68-65	2-68	PTr-K	262.012	6032.57	1.98858	18.6273	8.78954	0.207699	8.81544	0.0280597	0.675187	0.0765914	178.393	1.18797	191.62	15.3951	357.819	198.748	178.393	1.18797	NA
2-68-80	2-68	PTr-K	429.329	19695.2	1.82945	19.6712	3.61782	0.196834	3.63122	0.0280821	0.31161	0.0858142	178.534	0.548695	182.444	6.06393	233.416	83.5073	178.534	0.548695	NA
2-68-49	2-68	PTr-K	471.225	12373.5	1.39517	20.3102	3.41212	0.191141	4.09462	0.0281558	2.26348	0.552793	178.996	3.99579	177.602	6.67176	159.121	79.8678	178.996	3.99579	NA
2-68-76	2-68	PTr-K	368.033	7262.25	1.30584	19.1594	9.17413	0.203	10.1604	0.0282082	4.36682	0.429788	179.324	7.72286	187.661	17.4106	293.906	209.82	179.324	7.72286	NA
2-68-31	2-68	PTr-K	635.44	15874.9	1.28434	20.6661	2.50419	0.188338	2.82665	0.0282289	1.31111	0.463839	179.454	2.3204	175.21	4.54886	118.325	59.0203	179.454	2.3204	NA
2-68-44	2-68	PTr-K	413.297	28692.9	0.893362	20.5229	6.10729	0.190349	6.26006	0.0283328	1.37453	0.219571	180.105	2.44134	176.927	10.1648	134.689	143.655	180.105	2.44134	NA
2-68-22	2-68	PTr-K	297.635	12240.6	1.74162	20.4792	5.20662	0.190886	5.2775	0.0283521	0.862037	0.163342	180.226	1.5321	177.385	8.58958	139.692	122.307	180.226	1.5321	NA
2-68-27	2-68	PTr-K	534.64	9156.09	1.56185	19.2991	7.09785	0.202989	7.23727	0.0284123	1.41374	0.195341	180.604	2.51783	187.652	12.4004	277.32	162.704	180.604	2.51783	NA
2-68-41	2-68	PTr-K	453.498	19599.1	1.81095	20.4773	3.85727	0.192392	3.91559	0.0285731	0.673291	0.171951	181.611	1.20571	178.668	6.41505	139.874	90.5768	181.611	1.20571	NA
2-68-81	2-68	PTr-K	476.49	16330.9	1.08471	19.9523	3.18907	0.197631	3.37516	0.0285988	1.10522	0.327456	181.772	1.98092	183.12	5.65538	200.567	74.0445	181.772	1.98092	NA
2-68-11	2-68	PTr-K	802.793	33461.4	1.87258	19.8365	3.34313	0.198847	4.70417	0.0286077	3.30949	0.703523	181.828	5.93352	184.15	7.92277	214.06	77.4463	181.828	5.93352	NA
2-68-59	2-68	PTr-K	765.466	3521.47	0.841843	18.0769	9.33658	0.218962	9.3821	0.0287072	0.923098	0.0983892	182.452	1.6606	201.046	17.1139	425.132	208.694	182.452	1.6606	NA
2-68-46	2-68	PTr-K	251.383	10750.4	1.32924	20.9156	12.2151	0.189246	12.3329	0.0287075	1.70007	0.137849	182.454	3.05837	175.986	19.9299	89.9217	290.39	182.454	3.05837	NA
2-68-97	2-68	PTr-K	481.776	32758.7	2.22633	20.558	6.23778	0.192572	6.27149	0.0287126	0.649359	0.103542	182.486	1.16837	178.822	10.2831	130.657	146.838	182.486	1.16837	NA
2-68-25	2-68	PTr-K	185.608	10286.4	2.02951	19.6285	9.31682	0.201977	9.49719	0.0287533	1.84211	0.193964	182.741	3.31903	186.798	16.2057	238.402	215.239	182.741	3.31903	NA
2-68-24	2-68	PTr-K	288.458	9155.42	2.05763	22.075	16.7952	0.179757	16.8494	0.0287796	1.34941	0.0800868	182.906	2.43347	167.851	26.0736	-39.4684	410.31	182.906	2.43347	NA
2-68-72	2-68	PTr-K	416.589	18425.4	1.56018	20.6702	6.06112	0.192505	6.39877	0.0288593	2.05112	0.32055	183.405	3.70886	178.764	10.4887	117.834	143.012	183.405	3.70886	NA
2-68-18	2-68	PTr-K	648.669	24408.1	1.70529	20.011	4.89482	0.201508	4.95528	0.0292455	0.7717	0.155733	185.824	1.41354	186.401	8.43865	193.739	113.87	185.824	1.41354	NA
2-68-4	2-68	PTr-K	662.573	40749.5	1.99004	19.5641	3.67102	0.207489	3.8407	0.029441	1.12899	0.293953	187.049	2.08141	191.443	6.70128	245.98	84.574	187.049	2.08141	NA
2-68-73	2-68	PTr-K	601.003	24175.8	2.73764	20.1049	2.07949	0.20267	2.65813	0.0295523	1.65572	0.622888	187.745	3.0637	187.383	4.54834	182.799	48.4253	187.745	3.0637	NA
2-68-52	2-68	PTr-K	418.087	18265.7	1.66418	20.2297	3.51898	0.202049	5.09135	0.0296445	3.67949	0.722694	188.323	6.82908	186.858	8.68976	168.369	82.2153	188.323	6.82908	NA
2-68-26	2-68	PTr-K	330.49	8111.16	1.87964	20.1509	7.32872	0.208057	7.39968	0.0304071	1.02233	0.138158	193.096	1.94479	191.921	12.9408	177.475	171.1	193.096	1.94479	NA
2-68-45	2-68	PTr-K	282.79	13880.8	1.27524	19.9386	6.72709	0.224839	6.75803	0.0325137	0.645965	0.0955847	206.261	1.31129	205.929	12.597	202.155	156.312	206.261	1.31129	NA
2-68-13	2-68	PTr-K	355.49	20624.3	2.62665	19.6099	2.89403	0.230803	4.26175	0.0328258	3.12844	0.734074	208.21	6.40966	210.861	8.11485	240.586	66.7238	208.21	6.40966	NA
2-68-3	2-68	PTr-K	942.505	43829.8	3.29709	19.6614	1.81585	0.2442	2.64121	0.0348224	1.91799	0.726178	220.659	4.1606	221.854	5.2637	234.561	41.9069	220.659	4.1606	NA
2-68-70	2-68	PTr-K	276.19	48042.8	1.6032	10.3767	0.48663	3.3057	0.542001	0.248782	0.238654	0.440321	1432.19	3.06493	1482.4	4.22525	1554.98	9.13442	1554.98	9.13442	92.1037
3-100-35	3-100	PTr-K	1094.41	24546.4	1.08998	20.095	2.65367	0.20236	2.7311	0.0294925	0.64572	0.236432	187.371	1.19248	187.121	4.66726	183.944	61.8324	187.371	1.19248	NA	exclude	high U
3-100-2	3-100	PTr-K	1097.06	31968.5	0.99045	20.1357	1.2543	0.21361	1.47579	0.031195	0.777619	0.526917	198.023	1.51646	196.577	2.63753	179.234	29.2302	198.023	1.51646	NA	exclude	high U
3-100-86	3-100	PTr-K	1310.32	14881.7	1.56148	19.8347	3.94528	0.218286	5.97328	0.0314014	4.48495	0.750836	199.313	8.80234	200.482	10.8676	214.275	91.421	199.313	8.80234	NA	exclude	high U
3-100-98	3-100	PTr-K	2398.46	44695.4	0.515231	20.0376	0.990917	0.217684	1.67768	0.0316353	1.35377	0.80693	200.775	2.67614	199.981	3.04532	190.645	23.074	200.775	2.67614	NA	exclude	high U
3-100-61	3-100	PTr-K	1145.57	37343.6	2.11896	19.7266	2.20199	0.221292	2.44303	0.0316604	1.05813	0.433121	200.932	2.09332	202.984	4.49477	226.886	50.9128	200.932	2.09332	NA	exclude	high U
3-100-49	3-100	PTr-K	1651.41	35905.9	2.59769	19.7287	1.31223	0.222912	1.45933	0.0318956	0.638502	0.437532	202.401	1.27226	204.33	2.70098	226.632	30.3213	202.401	1.27226	NA	exclude	high U
3-100-21	3-100	PTr-K	1082.27	48520.8	2.34044	19.9749	2.54037	0.222582	2.75187	0.0322458	1.05796	0.384452	204.589	2.13048	204.056	5.08712	197.899	59.0317	204.589	2.13048	NA	exclude	high U
3-100-31	3-100	PTr-K	1638.75	22707.1	2.87168	19.6703	1.49105	0.226409	2.66519	0.0323	2.20908	0.828863	204.927	4.4558	207.23	4.99598	233.523	34.3946	204.927	4.4558	NA	exclude	high U
3-100-26	3-100	PTr-K	2690.44	23242.4	4.12826	19.6468	0.860429	0.228706	1.03663	0.0325888	0.578157	0.557727	206.731	1.17627	209.13	1.95923	236.261	19.8395	206.731	1.17627	NA	exclude	high U
3-100-15	3-100	PTr-K	1427.36	49245.3	1.8099	19.8507	1.80479	0.226546	1.83747	0.032616	0.345032	0.187775	206.9	0.702537	207.343	3.44608	212.361	41.8212	206.9	0.702537	NA	exclude	high U
3-100-63	3-100	PTr-K	2592.57	47819.9	0.900454	19.7841	1.19802	0.227495	2.26153	0.0326427	1.91814	0.848161	207.067	3.90873	208.129	4.25586	220.164	27.7109	207.067	3.90873	NA	exclude	high U
3-100-1	3-100	PTr-K	1201.61	58570.6	2.41566	19.7031	3.02599	0.232169	3.22103	0.0331772	1.10382	0.342693	210.402	2.28498	211.988	6.16261	229.62	69.9178	210.402	2.28498	NA	exclude	high U
3-100-38	3-100	PTr-K	1071.2	51113.4	2.41083	19.6112	0.740736	0.236637	0.989444	0.0336577	0.65598	0.662978	213.4	1.37694	215.663	1.92248	240.451	17.0737	213.4	1.37694	NA	exclude	high U
3-100-79	3-100	PTr-K	1178.84	48960.2	2.33378	19.8874	1.78925	0.236088	2.22556	0.0340527	1.32351	0.594688	215.863	2.80967	215.212	4.31615	208.075	41.4944	215.863	2.80967	NA	exclude	high U
3-100-14	3-100	PTr-K	1583.14	29549.4	2.28242	19.6312	0.961336	0.239839	1.61667	0.0341479	1.29979	0.803993	216.457	2.76678	218.289	3.17547	238.107	22.1734	216.457	2.76678	NA	exclude	high U
3-100-88	3-100	PTr-K	1072.97	55564.5	2.45731	19.9945	1.88971	0.235921	1.98504	0.0342118	0.607787	0.306183	216.855	1.29609	215.075	3.84749	195.654	43.9202	216.855	1.29609	NA	exclude	high U
3-100-36	3-100	PTr-K	1646.9	76007.3	2.01316	19.5961	1.23113	0.242607	1.85171	0.0344805	1.38316	0.746965	218.529	2.97195	220.553	3.67092	242.228	28.3502	218.529	2.97195	NA	exclude	high U
3-100-53	3-100	PTr-K	1156.22	62854.8	1.95892	20.1102	1.21341	0.23643	2.2997	0.034484	1.95353	0.849469	218.551	4.1979	215.493	4.46517	182.182	28.2885	218.551	4.1979	NA	exclude	high U
3-100-30	3-100	PTr-K	1485.8	57220.5	1.29029	19.9698	0.96092	0.24526	1.1098	0.0355222	0.555243	0.500308	225.018	1.22784	222.719	2.21944	198.521	22.335	225.018	1.22784	NA	exclude	high U
3-100-32	3-100	PTr-K	1093.37	70691.5	3.8251	19.6181	1.96242	0.251544	2.07346	0.0357907	0.669452	0.322867	226.689	1.4912	227.83	4.23153	239.623	45.2436	226.689	1.4912	NA	exclude	high U
3-100-81	3-100	PTr-K	1014.55	5950.52	1.08793	18.5752	5.08224	0.294369	7.49364	0.0396575	5.50686	0.734871	250.71	13.5412	261.993	17.3061	364.137	114.658	250.71	13.5412	NA	exclude	high U
3-100-80	3-100	PTr-K	1859.99	18894.5	0.936547	11.891	0.988966	0.85925	5.18866	0.0741031	5.09353	0.981667	460.828	22.6532	629.713	24.3529	1294.79	19.2346	460.828	22.6532	NA	exclude	high U
3-100-41	3-100	PTr-K	742.246	21958.5	14.8032	17.452	2.62456	0.374695	3.01975	0.0474265	1.49352	0.494583	298.702	4.3594	323.127	8.35762	503.082	57.7788	298.702	4.3594	NA	exclude	high U/Th
3-100-3	3-100	PTr-K	336.922	56663.9	16.5659	17.3126	2.61365	0.541837	3.1732	0.0680348	1.79944	0.567075	424.305	7.38927	439.635	11.3234	520.696	57.3395	424.305	7.38927	NA	exclude	high U/Th
3-100-42	3-100	PTr-K	579.276	119956	11.2583	12.4132	0.777772	1.84099	1.1556	0.165742	0.854685	0.739602	988.609	7.83349	1060.21	7.60376	1210.71	15.3075	1210.71	15.3075	81.655	exclude	high U/Th
3-100-5	3-100	PTr-K	564.661	17528.6	4.03474	20.2355	4.51961	0.171928	4.74048	0.0252325	1.43011	0.30168	160.641	2.26895	161.091	7.06162	167.689	105.603	160.641	2.26895	NA		isolated young age
3-100-73	3-100	PTr-K	486.799	18596.1	4.65009	9.22297	0.608814	3.39917	4.01775	0.227375	3.97136	0.988453	1320.73	47.4275	1504.21	31.5322	1773.1	11.1124	1773.1	11.1124	74.4867	exclude	low concordance
3-100-83	3-100	PTr-K	133.186	23654.4	2.76765	8.28856	9.1244	4.38518	10.8419	0.263612	5.85602	0.540127	1508.3	78.7579	1709.55	89.8786	1965.81	163.088	1965.81	163.088	76.7263	exclude	low concordance
3-100-56	3-100	PTr-K	932.198	26802.7	1.41322	19.6583	4.41482	0.199961	4.54913	0.0285095	1.09724	0.241198	181.213	1.96065	185.093	7.6974	234.926	101.905	181.213	1.96065	NA
3-100-47	3-100	PTr-K	954.487	10165.7	2.08402	19.9072	2.62714	0.204703	2.68613	0.0295553	0.559848	0.208422	187.764	1.03603	189.098	4.63452	205.782	60.9651	187.764	1.03603	NA
3-100-37	3-100	PTr-K	591.596	17902.1	1.0377	19.9155	3.90024	0.2066	4.04714	0.0298416	1.08048	0.266974	189.557	2.0183	190.696	7.03643	204.845	90.5073	189.557	2.0183	NA
3-100-59	3-100	PTr-K	115.557	3110.37	1.19729	23.1303	18.7897	0.179196	18.9107	0.0300614	2.13637	0.112971	190.932	4.01921	167.369	29.1877	-154.136	470.001	190.932	4.01921	NA
3-100-9	3-100	PTr-K	335.214	9923.4	1.43403	18.9561	2.94733	0.219826	3.14696	0.0302222	1.103	0.350496	191.939	2.08587	201.765	5.75846	318.184	66.9906	191.939	2.08587	NA
3-100-33	3-100	PTr-K	688.938	22832.8	1.44837	20.159	3.25094	0.20732	3.28957	0.0303116	0.502677	0.152809	192.498	0.95334	191.301	5.73579	176.538	75.8419	192.498	0.95334	NA
3-100-19	3-100	PTr-K	640.033	5133.07	1.41996	18.9665	11.0861	0.220927	11.8479	0.0303902	4.17997	0.352802	192.99	7.94737	202.681	21.7719	316.944	252.741	192.99	7.94737	NA
3-100-28	3-100	PTr-K	952.908	42276.9	4.23617	20.2535	2.70343	0.207334	3.02069	0.0304559	1.34761	0.446126	193.401	2.56758	191.313	5.26726	165.612	63.1752	193.401	2.56758	NA
3-100-94	3-100	PTr-K	261.497	7861.61	1.98982	20.7662	10.916	0.202583	10.9685	0.0305112	1.07235	0.097766	193.747	2.04673	187.31	18.7636	106.921	258.519	193.747	2.04673	NA
3-100-34	3-100	PTr-K	992.347	32770.5	1.00023	20.2728	2.20979	0.207587	2.46082	0.0305219	1.08281	0.440018	193.814	2.06739	191.526	4.29531	163.394	51.6803	193.814	2.06739	NA
3-100-57	3-100	PTr-K	167.067	8529.98	1.93771	20.022	9.45695	0.213229	9.52649	0.0309637	1.149	0.120611	196.577	2.22457	196.259	17.0023	192.462	220.319	196.577	2.22457	NA
3-100-76	3-100	PTr-K	221.123	5370.97	1.46067	21.4786	15.5637	0.200074	15.8069	0.031167	2.76207	0.174738	197.848	5.3817	185.189	26.7646	26.5883	375.168	197.848	5.3817	NA
3-100-23	3-100	PTr-K	356.92	1404.24	1.58501	18.9783	8.65417	0.227304	8.73916	0.0312869	1.21586	0.139128	198.598	2.37786	207.97	16.4358	315.538	197.145	198.598	2.37786	NA
3-100-68	3-100	PTr-K	325.998	2556.54	1.33813	15.8386	20.1565	0.272735	20.7603	0.0313297	4.97026	0.239412	198.865	9.7332	244.878	45.2014	712.826	432.424	198.865	9.7332	NA
3-100-93	3-100	PTr-K	200.277	9551.09	1.6806	20.4853	12.3549	0.211054	12.4825	0.0313569	1.78035	0.142628	199.035	3.48939	194.437	22.0918	138.959	291.076	199.035	3.48939	NA
3-100-91	3-100	PTr-K	523.5	17666.7	2.06337	20.471	3.12044	0.212226	3.45493	0.0315091	1.48303	0.429251	199.986	2.92033	195.419	6.14172	140.597	73.2744	199.986	2.92033	NA
3-100-7	3-100	PTr-K	118.146	6203.59	1.94343	19.5152	12.6878	0.223594	12.7144	0.031647	0.822318	0.0646759	200.848	1.62615	204.897	23.5954	251.754	292.909	200.848	1.62615	NA
3-100-92	3-100	PTr-K	196.393	9684.12	1.84403	20.8532	12.1427	0.209556	12.202	0.0316935	1.20207	0.0985143	201.139	2.3805	193.18	21.4684	96.9955	288.276	201.139	2.3805	NA
3-100-72	3-100	PTr-K	917.007	22406.5	1.4921	20.0193	2.37272	0.218818	3.23966	0.031771	2.20581	0.680877	201.623	4.37858	200.925	5.90579	192.771	55.1777	201.623	4.37858	NA
3-100-70	3-100	PTr-K	122.969	3112.29	1.64073	23.3763	11.718	0.187822	11.8161	0.0318434	1.51888	0.128544	202.075	3.02167	174.769	18.9735	-180.468	293.294	202.075	3.02167	NA
3-100-13	3-100	PTr-K	783.261	18122.6	1.54189	19.1978	2.54055	0.228839	2.57424	0.0318625	0.41515	0.161271	202.195	0.826383	209.24	4.86763	289.319	58.0595	202.195	0.826383	NA
3-100-43	3-100	PTr-K	467.265	13539.9	1.51831	19.5001	4.19713	0.225476	4.68799	0.0318886	2.08838	0.445474	202.357	4.16035	206.457	8.75835	253.521	96.5609	202.357	4.16035	NA
3-100-20	3-100	PTr-K	410.162	18196.5	3.99596	19.8286	3.46808	0.22189	3.67509	0.0319102	1.21601	0.330879	202.493	2.42406	203.482	6.77657	214.965	80.3184	202.493	2.42406	NA
3-100-82	3-100	PTr-K	435.427	17047	2.89824	20.6307	6.04041	0.214812	6.31232	0.0321418	1.83269	0.290335	203.939	3.67907	197.583	11.3341	122.369	142.392	203.939	3.67907	NA
3-100-55	3-100	PTr-K	474.172	17666.5	2.72154	20.0622	2.86579	0.221899	3.38769	0.0322874	1.80657	0.533275	204.849	3.64255	203.489	6.24682	187.746	66.7005	204.849	3.64255	NA
3-100-65	3-100	PTr-K	227.66	13701.7	2.11926	21.0567	4.21081	0.211697	4.44348	0.0323299	1.41901	0.319347	205.114	2.86477	194.976	7.88283	73.9716	100.106	205.114	2.86477	NA
3-100-6	3-100	PTr-K	99.905	4539.67	1.97214	22.2558	16.8578	0.20063	17.0439	0.0323846	2.51228	0.1474	205.455	5.08023	185.659	28.927	-59.3152	413.421	205.455	5.08023	NA
3-100-77	3-100	PTr-K	492.552	14234.2	2.60834	19.2277	3.22826	0.232405	3.5703	0.0324094	1.52493	0.427116	205.61	3.08595	212.182	6.83649	285.774	73.8298	205.61	3.08595	NA
3-100-24	3-100	PTr-K	482.549	23620	3.04011	20.1794	6.49538	0.221773	6.50312	0.0324576	0.317191	0.0487751	205.911	0.64281	203.385	11.9865	174.175	151.673	205.911	0.64281	NA
3-100-16	3-100	PTr-K	800.146	51632.1	1.43104	19.8057	2.0356	0.226165	2.68757	0.0324873	1.75481	0.652937	206.097	3.55941	207.028	5.0335	217.618	47.1397	206.097	3.55941	NA
3-100-69	3-100	PTr-K	627.494	26044.3	2.20652	19.8275	2.40193	0.226091	2.71075	0.0325125	1.25656	0.463545	206.254	2.55068	206.967	5.07557	215.068	55.617	206.254	2.55068	NA
3-100-89	3-100	PTr-K	982.186	32781.2	2.47088	19.6966	1.2361	0.227674	1.7793	0.0325239	1.27983	0.719288	206.325	2.59879	208.276	3.35051	230.391	28.5584	206.325	2.59879	NA
3-100-60	3-100	PTr-K	337.538	14121.5	1.66523	19.5004	3.94496	0.231369	4.04451	0.0327226	0.891807	0.220498	207.565	1.8216	211.328	7.71651	253.46	90.7663	207.565	1.8216	NA
3-100-100	3-100	PTr-K	515.375	38420.1	1.94483	19.6487	5.29228	0.230426	5.6196	0.032837	1.8899	0.336304	208.28	3.87336	210.55	10.6863	236.042	122.148	208.28	3.87336	NA
3-100-40	3-100	PTr-K	335.47	13507	2.53253	19.755	2.1118	0.230709	2.51993	0.0330552	1.37489	0.545607	209.641	2.83598	210.784	4.79656	223.57	48.8361	209.641	2.83598	NA
3-100-52	3-100	PTr-K	972.817	30020.2	1.73586	19.8543	1.8353	0.230131	1.89742	0.0331382	0.481556	0.253795	210.159	0.995715	210.307	3.60428	211.937	42.5307	210.159	0.995715	NA
3-100-85	3-100	PTr-K	161.873	11906.3	1.81075	21.1391	13.2929	0.216628	13.3352	0.0332123	1.06119	0.0795786	210.622	2.19899	199.099	24.1138	64.6849	317.695	210.622	2.19899	NA
3-100-75	3-100	PTr-K	852.25	31251.6	2.75456	20.2063	2.2929	0.226999	2.38899	0.0332668	0.670712	0.280751	210.961	1.39204	207.718	4.48773	171.062	53.5528	210.961	1.39204	NA
3-100-54	3-100	PTr-K	564.717	37658.5	2.02382	19.672	2.75307	0.233355	2.87634	0.0332939	0.833032	0.289615	211.131	1.7303	212.965	5.52592	233.316	63.5636	211.131	1.7303	NA
3-100-97	3-100	PTr-K	877.178	55532.9	2.57759	20.0127	2.09949	0.229565	2.28926	0.0333204	0.912605	0.398646	211.296	1.89704	209.839	4.33992	193.539	48.8185	211.296	1.89704	NA
3-100-10	3-100	PTr-K	264.302	9423.25	1.53077	19.7943	6.39287	0.232169	6.82512	0.0333306	2.39029	0.35022	211.36	4.9702	211.988	13.0587	218.949	148.06	211.36	4.9702	NA
3-100-39	3-100	PTr-K	608.804	22471.5	1.0446	19.6758	2.25056	0.233999	2.69006	0.0333923	1.47356	0.547782	211.745	3.06951	213.495	5.17959	232.822	51.9727	211.745	3.06951	NA
3-100-51	3-100	PTr-K	728.119	16612.6	2.99543	19.9273	3.22345	0.234302	3.3056	0.0338628	0.732353	0.221549	214.679	1.54632	213.743	6.37147	203.449	74.8262	214.679	1.54632	NA
3-100-45	3-100	PTr-K	290.671	11693.1	1.92915	19.2148	7.64765	0.243266	7.90225	0.0339013	1.98973	0.251793	214.919	4.20581	221.092	15.7012	287.335	175.034	214.919	4.20581	NA
3-100-12	3-100	PTr-K	722.94	27295.5	1.66632	19.724	4.28224	0.238561	4.34757	0.0341267	0.750839	0.172703	216.324	1.5973	217.241	8.50294	227.194	99.0091	216.324	1.5973	NA
3-100-78	3-100	PTr-K	142.604	5508.42	2.10068	21.0389	10.2428	0.226315	10.2735	0.0345332	0.792606	0.0771509	218.858	1.70556	207.152	19.2535	75.9636	243.916	218.858	1.70556	NA
3-100-84	3-100	PTr-K	942.442	43646.6	2.55937	20.0892	1.75396	0.241283	2.40617	0.0351549	1.6472	0.684575	222.731	3.60617	219.47	4.74913	184.622	40.8692	222.731	3.60617	NA
3-100-11	3-100	PTr-K	506.003	18272.8	3.1753	19.8078	3.92322	0.244924	4.03125	0.0351858	0.926976	0.229948	222.923	2.03112	222.445	8.05318	217.402	90.8425	222.923	2.03112	NA
3-100-90	3-100	PTr-K	438.176	20910.2	2.18154	19.9464	2.60275	0.303872	2.85993	0.0439596	1.18528	0.414444	277.33	3.21744	269.42	6.7678	201.217	60.4365	277.33	3.21744	NA
3-100-99	3-100	PTr-K	302.978	19487.2	2.62841	18.6838	3.92115	0.402438	6.32017	0.0545336	4.95673	0.784271	342.295	16.5241	343.415	18.4171	351.015	88.6367	342.295	16.5241	NA
3-100-29	3-100	PTr-K	568.492	43278.1	1.19197	18.158	1.16955	0.502423	1.58408	0.0661661	1.06839	0.674453	413.016	4.27423	413.341	5.37884	415.132	26.136	413.016	4.27423	NA
3-100-48	3-100	PTr-K	467.964	42075.7	3.4542	16.7015	1.4638	0.624566	5.69144	0.075654	5.49998	0.96636	470.13	24.9368	492.705	22.2209	599.048	31.6992	470.13	24.9368	NA
3-100-18	3-100	PTr-K	225.515	28732.3	2.35637	17.2338	5.00747	0.624567	5.02356	0.0780652	0.40174	0.0799711	484.564	1.87532	492.706	19.6127	530.751	109.775	484.564	1.87532	NA
3-100-67	3-100	PTr-K	235.234	12933.2	3.00272	15.7594	2.88848	0.853648	5.83488	0.0975704	5.06976	0.868872	600.155	29.0533	626.65	27.2909	723.465	61.2865	600.155	29.0533	82.9556
3-100-25	3-100	PTr-K	460.223	68569.6	8.65903	13.581	0.954698	1.70693	1.46199	0.168131	1.10723	0.757346	1001.81	10.2734	1011.14	9.36105	1031.38	19.3148	1031.38	19.3148	97.1327
3-100-44	3-100	PTr-K	478.881	97204.6	3.81617	12.9786	0.704812	1.92554	2.38574	0.18125	2.27925	0.955365	1073.8	22.5449	1089.99	15.9454	1122.51	14.071	1122.51	14.071	95.661
3-100-4	3-100	PTr-K	700.03	93027.6	3.98221	12.7058	0.287219	2.01048	0.613055	0.185269	0.54161	0.883461	1095.69	5.45745	1119.05	4.15715	1164.68	5.69087	1164.68	5.69087	94.0764
3-100-64	3-100	PTr-K	755.757	74759.7	2.82093	12.6606	0.223642	2.0897	1.57139	0.191883	1.5554	0.989821	1131.57	16.1422	1145.43	10.7919	1171.78	4.44638	1171.78	4.44638	96.5683
3-100-58	3-100	PTr-K	254.417	26938.5	4.43013	12.5877	0.929669	2.23579	2.40747	0.204115	2.22073	0.922432	1197.39	24.2674	1192.34	16.892	1183.21	18.3813	1183.21	18.3813	101.199
3-100-96	3-100	PTr-K	103.159	35576.2	2.22086	12.2902	2.44205	2.42615	2.58155	0.21626	0.837125	0.324272	1262.08	9.59529	1250.38	18.5639	1230.31	47.9205	1230.31	47.9205	102.582
3-100-50	3-100	PTr-K	178.127	48189.9	2.6816	11.9687	2.32394	2.37777	2.6801	0.206404	1.33502	0.498122	1209.63	14.7242	1235.94	19.159	1282.1	45.2646	1282.1	45.2646	94.3473
3-100-22	3-100	PTr-K	95.09	32880.7	2.81008	11.1	2.29667	3.03738	2.34406	0.244525	0.468962	0.200064	1410.18	5.93984	1417.07	17.9079	1427.42	43.8563	1427.42	43.8563	98.7923
3-100-17	3-100	PTr-K	314.125	5962.74	2.79368	9.55951	1.29762	3.54601	2.03715	0.245853	1.5704	0.770882	1417.05	19.9774	1537.54	16.1361	1707.41	23.8831	1707.41	23.8831	82.994
3-100-62	3-100	PTr-K	124.841	33178.4	3.22964	9.54009	0.844947	4.21301	0.933555	0.291504	0.396976	0.42523	1649.04	5.77604	1676.56	7.66094	1711.16	15.5432	1711.16	15.5432	96.3698
3-100-87	3-100	PTr-K	54.1017	31936.9	0.868803	8.79927	1.2278	5.18872	1.33086	0.331136	0.513512	0.385851	1843.88	8.2348	1850.77	11.3302	1858.5	22.1802	1858.5	22.1802	99.2138
3-100-66	3-100	PTr-K	138.808	58067.4	2.23302	5.37912	0.338186	11.0454	1.05893	0.430913	1.00347	0.947631	2309.83	19.4805	2526.96	9.85983	2706.25	5.58138	2706.25	5.58138	85.3519
3-100-8	3-100	PTr-K	31.2482	20515.9	1.20617	4.85467	0.801772	15.6641	2.25339	0.551524	2.10593	0.93456	2831.51	48.2588	2856.53	21.5108	2874.22	13.0279	2874.22	13.0279	98.5139
3-57-31	3-57	PTr-K	2085.29	7469.65	4.21402	19.4429	3.11825	0.21801	5.09511	0.0307424	4.02948	0.790852	195.193	7.74737	200.252	9.26023	260.288	71.641	195.193	7.74737	NA	exclude	high U
3-57-52	3-57	PTr-K	1058.28	38264.7	5.70625	20.0116	1.14681	0.235523	3.66509	0.0341834	3.48105	0.949785	216.678	7.4173	214.748	7.09422	193.664	26.6828	216.678	7.4173	NA	exclude	high U
3-57-48	3-57	PTr-K	1014.64	57308.7	3.65631	19.673	2.03448	0.24489	2.22581	0.0349414	0.902837	0.405622	221.401	1.96495	222.416	4.4459	233.199	46.9874	221.401	1.96495	NA	exclude	high U
3-57-40	3-57	PTr-K	276.26	17328.4	28.5471	19.0567	4.1661	0.331499	4.34119	0.0458174	1.22047	0.281136	288.791	3.44681	290.71	10.9748	306.158	94.9451	288.791	3.44681	NA	exclude	high U/Th
3-57-41	3-57	PTr-K	335.821	41046.4	21.0744	16.2177	1.74119	0.762039	7.22428	0.0896325	7.01131	0.97052	553.364	37.1799	575.186	31.7342	662.352	37.3111	553.364	37.1799	83.5452	exclude	high U/Th
3-57-68	3-57	PTr-K	894.344	121023	20.5777	13.8485	0.605547	1.53551	1.73909	0.154225	1.63026	0.937421	924.601	14.0423	944.707	10.6944	991.862	12.3129	924.601	14.0423	93.2187	exclude	high U/Th
3-57-92	3-57	PTr-K	602.472	146874	231.446	13.6745	0.680538	1.61332	1.53572	0.160004	1.3767	0.896452	956.8	12.2413	975.4	9.62681	1017.51	13.7838	956.8	12.2413	94.0339	exclude	high U/Th
3-57-46	3-57	PTr-K	146.603	37354.3	15.8756	13.7907	1.43878	1.68754	2.02164	0.168787	1.42018	0.702492	1005.42	13.2211	1003.83	12.8901	1000.34	29.2058	1000.34	29.2058	100.508	exclude	high U/Th
3-57-43	3-57	PTr-K	325.574	75566.4	10.5007	13.4245	0.83805	1.7329	2.0731	0.168722	1.89616	0.914649	1005.07	17.6464	1020.83	13.3483	1054.8	16.8975	1054.8	16.8975	95.2846	exclude	high U/Th
3-57-33	3-57	PTr-K	434.322	107214	29.8282	13.1592	0.770803	1.91738	3.00057	0.182995	2.89988	0.966442	1083.31	28.9172	1087.16	20.0265	1094.89	15.4252	1094.89	15.4252	98.943	exclude	high U/Th
3-57-39	3-57	PTr-K	194.434	54537.1	10.7898	11.1215	1.31531	3.01438	1.81761	0.243141	1.25446	0.69017	1403.01	15.8166	1411.26	13.8592	1423.73	25.127	1423.73	25.127	98.5441	exclude	high U/Th
3-57-24	3-57	PTr-K	465.21	896.484	6.07475	18.926	18.5854	0.174527	19.1218	0.0239563	4.4976	0.235208	152.612	6.78325	163.34	28.8586	321.836	425.435	152.612	6.78325	NA		isolated young age
3-57-71	3-57	PTr-K	379.761	19165.2	5.07185	19.835	6.08024	0.183627	6.34816	0.0264161	1.82479	0.287451	168.079	3.02744	171.177	10.0003	214.232	140.945	168.079	3.02744	NA		isolated young age
3-57-3	3-57	PTr-K	482.501	19694.5	4.0498	18.7881	7.42625	0.20568	9.51112	0.0280267	5.94241	0.624786	178.186	10.4436	189.921	16.4763	338.392	168.413	178.186	10.4436	NA		isolated young age
3-57-19	3-57	PTr-K	568.925	19609.4	1.98193	19.862	3.82402	0.198312	3.88164	0.0285674	0.666309	0.171657	181.576	1.19298	183.697	6.52274	211.054	88.6752	181.576	1.19298	NA		isolated young age
3-57-74	3-57	PTr-K	512.845	21382.2	5.37302	17.349	1.36859	0.306925	9.9174	0.0386194	9.82251	0.990432	244.27	23.5446	271.795	23.6531	516.094	30.0484	244.27	23.5446	NA	exclude	off concordia
3-57-55	3-57	PTr-K	268.15	27463.6	5.70385	16.6521	2.9349	0.512331	5.35291	0.0618756	4.47661	0.836294	387.022	16.8157	420.016	18.415	605.443	63.4921	387.022	16.8157	NA	exclude	off concordia
3-57-97	3-57	PTr-K	359.181	19579.8	3.72281	20.9138	6.21519	0.217033	6.59219	0.0329197	2.19737	0.333329	208.796	4.51451	199.437	11.9372	90.1262	147.41	208.796	4.51451	NA
3-57-26	3-57	PTr-K	759.719	30679.5	2.53056	19.8686	1.2098	0.232409	1.4608	0.0334904	0.818741	0.560473	212.357	1.71032	212.186	2.79719	210.289	28.0495	212.357	1.71032	NA
3-57-12	3-57	PTr-K	263.158	11955.5	2.31709	21.2965	7.62497	0.217527	7.71662	0.0335985	1.18582	0.153671	213.031	2.48487	199.849	13.9997	46.9805	182.392	213.031	2.48487	NA
3-57-13	3-57	PTr-K	744.338	33365.8	2.8276	19.6966	2.60747	0.24917	2.61941	0.0355947	0.24981	0.0953689	225.469	0.553507	225.902	5.30531	230.389	60.227	225.469	0.553507	NA
3-57-51	3-57	PTr-K	550.623	30308.3	3.64157	19.6743	4.44126	0.250485	4.90663	0.0357421	2.0857	0.425079	226.386	4.63979	226.97	9.98	233.052	102.541	226.386	4.63979	NA
3-57-62	3-57	PTr-K	65.9288	6008.86	3.41504	16.7775	13.0721	0.369079	14.6321	0.0449103	6.57404	0.449289	283.198	18.2146	318.971	40.0731	589.191	284.654	283.198	18.2146	NA
3-57-70	3-57	PTr-K	458.399	35417.1	2.83913	19.0445	2.16139	0.342521	2.86929	0.0473102	1.88712	0.657695	297.987	5.49537	299.08	7.43323	307.603	49.2093	297.987	5.49537	NA
3-57-59	3-57	PTr-K	112.991	7963.52	2.87613	17.727	7.96347	0.415208	8.58766	0.0533827	3.2142	0.374281	335.256	10.5004	352.619	25.5884	468.572	176.568	335.256	10.5004	NA
3-57-36	3-57	PTr-K	85.4899	13308.1	1.12183	20.5573	17.2643	0.377223	17.3249	0.0562423	1.44806	0.0835824	352.733	4.97054	324.993	48.2193	130.711	408.675	352.733	4.97054	NA
3-57-75	3-57	PTr-K	898.512	79158.2	3.16209	18.0133	1.37332	0.468368	2.25261	0.0611896	1.78556	0.792664	382.856	6.63709	390.061	7.29584	432.99	30.6163	382.856	6.63709	NA
3-57-80	3-57	PTr-K	269.274	28854.8	3.06498	18.2012	3.12189	0.483842	3.25308	0.0638706	0.914507	0.28112	399.122	3.5393	400.705	10.771	409.824	69.8231	399.122	3.5393	NA
3-57-9	3-57	PTr-K	316.487	30878.7	2.84223	18.7241	2.97827	0.484576	3.17648	0.0658054	1.1045	0.347714	410.835	4.39612	401.207	10.5281	346.113	67.3584	410.835	4.39612	NA
3-57-47	3-57	PTr-K	144.088	13235.6	3.27817	18.5225	6.7253	0.490188	6.75305	0.0658509	0.611582	0.0905638	411.11	2.43578	405.039	22.5592	370.543	151.597	411.11	2.43578	NA
3-57-65	3-57	PTr-K	154.456	16586.8	3.52527	17.5593	3.37759	0.523416	4.00289	0.0666581	2.14827	0.536678	415.99	8.65435	427.431	13.9656	489.613	74.5295	415.99	8.65435	NA
3-57-63	3-57	PTr-K	126.978	13612.4	2.27615	17.7742	3.7514	0.528158	4.57996	0.0680852	2.62736	0.573664	424.609	10.7965	430.586	16.074	462.716	83.1681	424.609	10.7965	NA
3-57-15	3-57	PTr-K	277.441	32537.2	3.09839	18.3722	3.33078	0.512352	3.58708	0.0682697	1.33155	0.371207	425.723	5.48558	420.029	12.3398	388.867	74.7865	425.723	5.48558	NA
3-57-66	3-57	PTr-K	127.832	13991.3	3.40001	18.3298	3.8616	0.518816	4.41159	0.0689716	2.13312	0.483526	429.957	8.87233	424.36	15.3026	394.047	86.6409	429.957	8.87233	NA
3-57-79	3-57	PTr-K	319.001	35449.2	7.57193	17.1813	2.29484	0.605425	3.22182	0.0754424	2.26139	0.701896	468.861	10.2264	480.671	12.3374	537.421	50.2294	468.861	10.2264	NA
3-57-69	3-57	PTr-K	53.2411	6164.88	2.09962	18.7556	8.23507	0.561056	8.62789	0.0763196	2.57375	0.298305	474.117	11.7647	452.213	31.4964	342.337	186.675	474.117	11.7647	NA
3-57-10	3-57	PTr-K	123.225	13479.6	1.73021	18.2543	3.41289	0.602961	4.07421	0.0798274	2.22516	0.546157	495.093	10.6042	479.111	15.5623	403.304	76.4318	495.093	10.6042	NA
3-57-20	3-57	PTr-K	59.4476	15475	2.64873	14.2141	2.72569	1.4662	2.93121	0.151151	1.07826	0.367853	907.412	9.12681	916.563	17.6964	938.642	55.8819	907.412	9.12681	96.6729
3-57-91	3-57	PTr-K	44.5888	8855.6	1.83784	13.7996	3.42531	1.51668	3.8607	0.151795	1.78108	0.461336	911.018	15.1316	937.138	23.6287	999.041	69.6074	911.018	15.1316	91.1892
3-57-98	3-57	PTr-K	130.894	31000	4.77544	13.524	1.83995	1.60703	2.74388	0.157627	2.03555	0.74185	943.575	17.8674	972.953	17.1757	1039.88	37.1627	943.575	17.8674	90.739
3-57-83	3-57	PTr-K	190.801	35174.2	3.5467	13.5734	1.35764	1.625	2.43511	0.159972	2.02153	0.830158	956.619	17.9719	979.928	15.3076	1032.51	27.4557	956.619	17.9719	92.6494
3-57-87	3-57	PTr-K	37.3415	12619.6	1.80681	13.7623	4.82927	1.63032	5.1812	0.162728	1.87698	0.362267	971.922	16.9342	981.982	32.6193	1004.52	98.0762	971.922	16.9342	96.7544
3-57-30	3-57	PTr-K	107.074	23879.7	3.16765	13.5902	1.77314	1.74372	3.00497	0.171871	2.42607	0.807353	1022.41	22.9374	1024.84	19.3937	1030.02	35.8482	1030.02	35.8482	99.261
3-57-76	3-57	PTr-K	457.069	85893.2	8.45348	13.4164	0.506925	1.66021	1.7455	0.161546	1.67027	0.9569	965.361	14.9749	993.455	11.0615	1056.03	10.208	1056.03	10.208	91.4139
3-57-64	3-57	PTr-K	105.033	38493.8	9.08184	13.2419	2.37844	1.8598	4.39444	0.178614	3.69515	0.840869	1059.4	36.0993	1066.91	29.0257	1082.31	47.7129	1082.31	47.7129	97.8834
3-57-54	3-57	PTr-K	69.3653	11913.4	2.89087	13.2351	3.87921	1.62658	4.01056	0.156136	1.01801	0.253833	935.265	8.86266	980.538	25.2237	1083.33	77.8249	1083.33	77.8249	86.3328
3-57-82	3-57	PTr-K	88.14	38192.5	7.1165	13.1381	2.33058	1.85566	3.82489	0.17682	3.03285	0.792925	1049.58	29.3761	1065.45	25.2424	1098.06	46.6414	1098.06	46.6414	95.585
3-57-17	3-57	PTr-K	132.461	31172.8	1.32321	12.9777	1.48118	2.04961	3.08699	0.192917	2.70843	0.87737	1137.16	28.2357	1132.17	21.0695	1122.6	29.5329	1122.6	29.5329	101.296
3-57-100	3-57	PTr-K	774.524	116574	8.29848	12.9069	0.484351	1.83494	1.60077	0.171768	1.52574	0.953126	1021.84	14.4178	1058.05	10.5209	1133.5	9.64207	1133.5	9.64207	90.1492
3-57-89	3-57	PTr-K	980.038	179262	2.4193	12.7691	0.270689	2.02357	1.22247	0.187403	1.19213	0.975177	1107.29	12.1289	1123.46	8.30763	1154.84	5.36384	1154.84	5.36384	95.8828
3-57-67	3-57	PTr-K	122.799	43002.2	2.21643	12.7676	1.57762	2.0042	2.31805	0.185588	1.69838	0.732675	1097.43	17.1384	1116.93	15.7037	1155.07	31.3254	1155.07	31.3254	95.0098
3-57-81	3-57	PTr-K	574.926	133283	7.25318	12.7148	0.467867	2.02895	1.59588	0.187102	1.52576	0.95606	1105.66	15.5023	1125.26	10.8549	1163.29	9.29212	1163.29	9.29212	95.0459
3-57-57	3-57	PTr-K	320.121	85405.3	9.17068	12.6508	1.05601	1.96241	2.25765	0.180056	1.99545	0.883862	1067.28	19.6275	1102.71	15.1867	1173.32	20.8983	1173.32	20.8983	90.9625
3-57-32	3-57	PTr-K	753.677	177073	5.41319	12.5866	0.286716	2.16453	3.77602	0.197592	3.76512	0.997113	1162.37	40.0465	1169.72	26.231	1183.38	5.66623	1183.38	5.66623	98.2253
3-57-27	3-57	PTr-K	22.3291	8783.02	2.41806	12.5255	5.40812	2.1261	5.53698	0.193142	1.1876	0.214485	1138.37	12.3929	1157.32	38.2551	1192.99	106.785	1192.99	106.785	95.4219
3-57-94	3-57	PTr-K	118.136	58723.6	1.72783	12.4661	1.44426	2.20637	3.06281	0.199484	2.70091	0.88184	1172.55	28.9563	1183.06	21.4032	1202.34	28.4635	1202.34	28.4635	97.5217
3-57-93	3-57	PTr-K	91.8414	43312.1	3.33896	12.1633	2.40936	2.46816	3.19338	0.217732	2.09587	0.656318	1269.88	24.1577	1262.75	23.0797	1250.64	47.1589	1250.64	47.1589	101.539
3-57-77	3-57	PTr-K	55.6151	21862.6	5.09891	12.1004	5.64886	2.31201	5.83144	0.202903	1.44779	0.248274	1190.9	15.7429	1215.98	41.3565	1260.78	110.478	1260.78	110.478	94.4568
3-57-90	3-57	PTr-K	177.454	57840.3	4.00526	11.9719	1.0505	2.30765	1.90183	0.20037	1.58538	0.833605	1177.31	17.0596	1214.64	13.4734	1281.58	20.4566	1281.58	20.4566	91.8633
3-57-21	3-57	PTr-K	376.961	151561	3.88991	11.9424	0.583951	2.49147	1.70396	0.215797	1.60078	0.939444	1259.63	18.3162	1269.56	12.3469	1286.4	11.3697	1286.4	11.3697	97.919
3-57-6	3-57	PTr-K	178.191	62051.3	5.22235	11.8208	0.732574	2.63547	1.2509	0.225946	1.01395	0.810574	1313.22	12.0467	1310.59	9.20796	1306.29	14.2251	1306.29	14.2251	100.53
3-57-56	3-57	PTr-K	183.402	49613.6	3.377	11.795	0.768078	2.38767	1.74867	0.204254	1.57096	0.898373	1198.13	17.1766	1238.91	12.5151	1310.54	14.9051	1310.54	14.9051	91.423
3-57-11	3-57	PTr-K	312.79	77022.1	1.2568	11.6766	0.4933	2.68916	0.752273	0.227736	0.567953	0.754982	1322.62	6.79136	1325.48	5.568	1330.09	9.54548	1330.09	9.54548	99.4384
3-57-1	3-57	PTr-K	361.288	121519	1.64576	11.4749	0.717914	2.56815	2.6	0.213731	2.49892	0.961123	1248.67	28.3673	1291.61	19.0034	1363.72	13.8282	1363.72	13.8282	91.5632
3-57-53	3-57	PTr-K	104.554	36347.4	5.39473	11.4504	1.54259	2.73179	1.64538	0.226865	0.572429	0.347901	1318.05	6.82356	1337.15	12.2306	1367.84	29.6971	1367.84	29.6971	96.3599
3-57-14	3-57	PTr-K	14.5393	6056.78	2.08251	11.1654	5.93122	2.8217	6.17491	0.228499	1.7176	0.278158	1326.63	20.5945	1361.32	46.325	1416.19	113.518	1416.19	113.518	93.6755
3-57-88	3-57	PTr-K	523.643	143799	3.09745	10.8116	0.323388	2.77313	1.14593	0.21745	1.09935	0.959354	1268.38	12.658	1348.33	8.552	1477.51	6.13296	1477.51	6.13296	85.8458
3-57-18	3-57	PTr-K	141.261	39863.2	2.22806	10.6963	0.827952	3.45477	1.72008	0.26801	1.5077	0.876531	1530.7	20.543	1516.96	13.5456	1497.82	15.6595	1497.82	15.6595	102.195
3-57-95	3-57	PTr-K	103.316	39222	2.39866	10.2048	1.579	3.86693	2.84089	0.286199	2.36166	0.831308	1622.5	33.8765	1606.81	22.9229	1586.27	29.518	1586.27	29.518	102.284
3-57-86	3-57	PTr-K	208.888	58176	5.88923	9.99532	0.584694	3.47979	1.30518	0.25226	1.16689	0.894044	1450.12	15.1532	1522.64	10.2947	1624.94	10.874	1624.94	10.874	89.2416
3-57-22	3-57	PTr-K	232.702	97184.6	1.22033	9.84737	0.343823	4.00311	1.21469	0.285902	1.16501	0.959104	1621.02	16.6978	1634.83	9.86885	1652.62	6.37256	1652.62	6.37256	98.0875
3-57-7	3-57	PTr-K	146.625	52580.4	3.07932	9.75301	1.64661	4.39054	2.03054	0.310567	1.18817	0.585151	1743.5	18.1508	1710.56	16.7945	1670.45	30.45	1670.45	30.45	104.373
3-57-29	3-57	PTr-K	125.616	46229.5	2.89656	9.5281	0.824583	4.41909	1.17021	0.305378	0.83033	0.709558	1717.92	12.5219	1715.92	9.68974	1713.47	15.1641	1713.47	15.1641	100.26
3-57-61	3-57	PTr-K	473.873	112228	9.07779	9.3354	0.292503	4.21557	1.80338	0.285422	1.7795	0.986758	1618.61	25.4719	1677.05	14.8014	1750.95	5.35452	1750.95	5.35452	92.4417
3-57-34	3-57	PTr-K	121.84	79581.9	5.10508	9.15505	0.988544	4.73881	2.01848	0.314651	1.75985	0.871865	1763.55	27.1528	1774.13	16.9255	1786.58	18.0149	1786.58	18.0149	98.711
3-57-35	3-57	PTr-K	661.294	143374	5.6502	8.58042	0.324732	4.85761	3.10653	0.302295	3.08951	0.994522	1702.68	46.2313	1794.94	26.164	1903.87	5.83475	1903.87	5.83475	89.4324
3-57-50	3-57	PTr-K	165.945	41790.5	2.12691	8.52059	0.455501	4.7729	2.11434	0.294952	2.0647	0.976518	1666.23	30.3162	1780.14	17.7516	1916.43	8.17212	1916.43	8.17212	86.9441
3-57-96	3-57	PTr-K	168.645	41290.4	1.2891	8.09506	0.430355	5.15758	1.6376	0.302806	1.58004	0.964851	1705.21	23.674	1845.65	13.9284	2007.84	7.63881	2007.84	7.63881	84.9274
3-57-25	3-57	PTr-K	134.597	70110.6	3.00544	7.42099	0.524077	7.21576	1.96614	0.388367	1.89501	0.963821	2115.25	34.1721	2138.45	17.5357	2160.8	9.14291	2160.8	9.14291	97.892
3-57-8	3-57	PTr-K	90.2561	50441.5	1.07904	7.41695	0.575804	7.32136	1.0982	0.393837	0.935143	0.851523	2140.6	17.0334	2151.42	9.8112	2161.75	10.0443	2161.75	10.0443	99.0214
89SS4	89SS4	pre-Mz																	923.445	30.081	NA
89SS4	89SS4	pre-Mz																	962.978	20.5818	NA
89SS4	89SS4	pre-Mz																	965.965	25.0783	NA
89SS4	89SS4	pre-Mz																	967.106	14.2874	NA
89SS4	89SS4	pre-Mz																	986.583	20.935	NA
89SS4	89SS4	pre-Mz																	993.974	14.183	NA
89SS4	89SS4	pre-Mz																	998.662	15.8041	NA
89SS4	89SS4	pre-Mz																	1000.47	37.523	NA
89SS4	89SS4	pre-Mz																	1009.33	22.759	NA
89SS4	89SS4	pre-Mz																	1010.51	22.6456	NA
89SS4	89SS4	pre-Mz																	1019.05	20.8923	NA
89SS4	89SS4	pre-Mz																	1030.93	9.0454	NA
89SS4	89SS4	pre-Mz																	1031.93	20.7765	NA
89SS4	89SS4	pre-Mz																	1033.05	41.7904	NA
89SS4	89SS4	pre-Mz																	1036.8	27.7198	NA
89SS4	89SS4	pre-Mz																	1043.29	19.6207	NA
89SS4	89SS4	pre-Mz																	1043.46	25.4022	NA
89SS4	89SS4	pre-Mz																	1044.16	28.3409	NA
89SS4	89SS4	pre-Mz																	1045.97	38.5807	NA
89SS4	89SS4	pre-Mz																	1052.18	18.1701	NA
89SS4	89SS4	pre-Mz																	1053.25	25.2194	NA
89SS4	89SS4	pre-Mz																	1055.95	19.7427	NA
89SS4	89SS4	pre-Mz																	1059.06	28.1709	NA
89SS4	89SS4	pre-Mz																	1061.4	60.7793	NA
89SS4	89SS4	pre-Mz																	1064.07	15.7741	NA
89SS4	89SS4	pre-Mz																	1073	28.4256	NA
89SS4	89SS4	pre-Mz																	1074.34	27.5946	NA
89SS4	89SS4	pre-Mz																	1076.51	21.7809	NA
89SS4	89SS4	pre-Mz																	1078.28	21.9227	NA
89SS4	89SS4	pre-Mz																	1078.52	36.0519	NA
89SS4	89SS4	pre-Mz																	1085.1	51.5218	NA
89SS4	89SS4	pre-Mz																	1092.6	43.2265	NA
89SS4	89SS4	pre-Mz																	1093.26	29.3212	NA
89SS4	89SS4	pre-Mz																	1094.34	38.3483	NA
89SS4	89SS4	pre-Mz																	1097.64	18.9561	NA
89SS4	89SS4	pre-Mz																	1106.43	30.241	NA
89SS4	89SS4	pre-Mz																	1106.43	32.3869	NA
89SS4	89SS4	pre-Mz																	1111.18	19.0765	NA
89SS4	89SS4	pre-Mz																	1114.78	28.2042	NA
89SS4	89SS4	pre-Mz																	1116.73	21.2141	NA
89SS4	89SS4	pre-Mz																	1119.74	25.8644	NA
89SS4	89SS4	pre-Mz																	1120.76	12.1334	NA
89SS4	89SS4	pre-Mz																	1121.27	15.1136	NA
89SS4	89SS4	pre-Mz																	1128.22	14.6837	NA
89SS4	89SS4	pre-Mz																	1137.48	19.0586	NA
89SS4	89SS4	pre-Mz																	1141.19	27.2604	NA
89SS4	89SS4	pre-Mz																	1142.82	43.2304	NA
89SS4	89SS4	pre-Mz																	1144.74	22.827	NA
89SS4	89SS4	pre-Mz																	1149.5	35.1101	NA
89SS4	89SS4	pre-Mz																	1151.3	19.0844	NA
89SS4	89SS4	pre-Mz																	1153.07	19.4108	NA
89SS4	89SS4	pre-Mz																	1161.88	26.535	NA
89SS4	89SS4	pre-Mz																	1173.03	30.7506	NA
89SS4	89SS4	pre-Mz																	1178.39	21.786	NA
89SS4	89SS4	pre-Mz																	1207.61	69.5584	NA
89SS4	89SS4	pre-Mz																	1209.76	28.4211	NA
89SS4	89SS4	pre-Mz																	1218.5	23.3846	NA
89SS4	89SS4	pre-Mz																	1230.74	20.6956	NA
89SS4	89SS4	pre-Mz																	1234.23	15.0374	NA
89SS4	89SS4	pre-Mz																	1237.99	38.3031	NA
89SS4	89SS4	pre-Mz																	1263.12	29.3534	NA
89SS4	89SS4	pre-Mz																	1265.54	28.902	NA
89SS4	89SS4	pre-Mz																	1270.79	16.3602	NA
89SS4	89SS4	pre-Mz																	1294.16	24.3648	NA
89SS4	89SS4	pre-Mz																	1317.38	26.874	NA
89SS4	89SS4	pre-Mz																	1343.69	45.0834	NA
89SS4	89SS4	pre-Mz																	1354.18	18.4475	NA
89SS4	89SS4	pre-Mz																	1365.38	26.0366	NA
89SS4	89SS4	pre-Mz																	1429.95	26.6291	NA
89SS4	89SS4	pre-Mz																	1458.16	19.161	NA
89SS4	89SS4	pre-Mz																	1538	47.886	NA
89SS4	89SS4	pre-Mz																	1555.07	47.639	NA
89SS4	89SS4	pre-Mz																	1783.29	34.2054	NA
89SS4	89SS4	pre-Mz																	1785.35	32.9783	NA
89SS4	89SS4	pre-Mz																	1800.41	40.9097	NA
89SS4	89SS4	pre-Mz																	1815.95	70.6717	NA
89SS4	89SS4	pre-Mz																	1819.5	34.6416	NA
89SS4	89SS4	pre-Mz																	1976.4	35.4809	NA
89SS4	89SS4	pre-Mz																	2399.07	72.9164	NA
89SS4	89SS4	pre-Mz																	2498.34	59.3771	NA
89SS4	89SS4	pre-Mz																	2540.84	40.1948	NA
89SS4	89SS4	pre-Mz																	2650.72	8.85694	NA
89SS4	89SS4	pre-Mz																	2672.54	43.3919	NA
89SS4	89SS4	pre-Mz																	2682.76	30.0699	NA
89SS4	89SS4	pre-Mz																	2743.04	8.19784	NA
89SS4	89SS4	pre-Mz																	2874.07	4.81934	NA
91SS32	91SS32	pre-Mz																	653.116	11.0511	NA
91SS32	91SS32	pre-Mz																	664.608	14.0912	NA
91SS32	91SS32	pre-Mz																	674.188	23.8131	NA
91SS32	91SS32	pre-Mz																	680.43	10.9075	NA
91SS32	91SS32	pre-Mz																	697.484	6.83955	NA
91SS32	91SS32	pre-Mz																	698.857	12.6422	NA
91SS32	91SS32	pre-Mz																	703.662	9.59343	NA
91SS32	91SS32	pre-Mz																	715.726	10.589	NA
91SS32	91SS32	pre-Mz																	717.313	12.0737	NA
91SS32	91SS32	pre-Mz																	723.134	21.0459	NA
91SS32	91SS32	pre-Mz																	729.244	22.4409	NA
91SS32	91SS32	pre-Mz																	766.151	18.6838	NA
91SS32	91SS32	pre-Mz																	782.115	48.5757	NA
91SS32	91SS32	pre-Mz																	801.67	18.0034	NA
91SS32	91SS32	pre-Mz																	871.872	30.9194	NA
91SS32	91SS32	pre-Mz																	942.528	83.6365	NA
91SS32	91SS32	pre-Mz																	1162.12	81.584	NA
91SS32	91SS32	pre-Mz																	1327.67	62.832	NA
91SS32	91SS32	pre-Mz																	1336.52	70.2314	NA
91SS32	91SS32	pre-Mz																	1372.43	115.045	NA
91SS32	91SS32	pre-Mz																	1418.22	29.215	NA
91SS32	91SS32	pre-Mz																	1444.79	45.1502	NA
91SS32	91SS32	pre-Mz																	1543.81	20.4237	NA
91SS32	91SS32	pre-Mz																	1556.96	33.9375	NA
91SS32	91SS32	pre-Mz																	1572.37	24.3892	NA
91SS32	91SS32	pre-Mz																	1576.74	67.9479	NA
91SS32	91SS32	pre-Mz																	1582.17	64.7752	NA
91SS32	91SS32	pre-Mz																	1590.1	43.4566	NA
91SS32	91SS32	pre-Mz																	1590.23	64.6716	NA
91SS32	91SS32	pre-Mz																	1602.23	50.879	NA
91SS32	91SS32	pre-Mz																	1616.27	45.1603	NA
91SS32	91SS32	pre-Mz																	1617.98	36.6705	NA
91SS32	91SS32	pre-Mz																	1623.55	30.9285	NA
91SS32	91SS32	pre-Mz																	1635.55	51.2372	NA
91SS32	91SS32	pre-Mz																	1636.72	32.8744	NA
91SS32	91SS32	pre-Mz																	1640.56	40.7197	NA
91SS32	91SS32	pre-Mz																	1653.73	35.5023	NA
91SS32	91SS32	pre-Mz																	1660.67	37.3703	NA
91SS32	91SS32	pre-Mz																	1662.08	30.4161	NA
91SS32	91SS32	pre-Mz																	1662.67	20.0593	NA
91SS32	91SS32	pre-Mz																	1663.92	42.0993	NA
91SS32	91SS32	pre-Mz																	1670.14	57.7127	NA
91SS32	91SS32	pre-Mz																	1670.38	18.3692	NA
91SS32	91SS32	pre-Mz																	1676.97	44.1492	NA
91SS32	91SS32	pre-Mz																	1680.17	48.9203	NA
91SS32	91SS32	pre-Mz																	1682.9	30.2988	NA
91SS32	91SS32	pre-Mz																	1687.66	33.3259	NA
91SS32	91SS32	pre-Mz																	1706.55	22.3031	NA
91SS32	91SS32	pre-Mz																	1706.63	36.9304	NA
91SS32	91SS32	pre-Mz																	1719.64	28.4576	NA
91SS32	91SS32	pre-Mz																	1733.54	188.732	NA
91SS32	91SS32	pre-Mz																	1768.58	32.711	NA
91SS32	91SS32	pre-Mz																	1782.93	17.5808	NA
91SS32	91SS32	pre-Mz																	1833.47	42.6335	NA
91SS32	91SS32	pre-Mz																	1913.7	44.7411	NA
91SS32	91SS32	pre-Mz																	2018.53	195.332	NA
91SS32	91SS32	pre-Mz																	2136.25	16.7073	NA
91SS32	91SS32	pre-Mz																	2145.34	73.1272	NA
91SS32	91SS32	pre-Mz																	2161.91	82.854	NA
91SS32	91SS32	pre-Mz																	2167.39	142.176	NA
91SS32	91SS32	pre-Mz																	2220.13	49.0215	NA
91SS32	91SS32	pre-Mz																	2229.37	38.3398	NA
91SS32	91SS32	pre-Mz																	2230.56	66.593	NA
91SS32	91SS32	pre-Mz																	2235.86	120.732	NA
91SS32	91SS32	pre-Mz																	2237.34	137.84	NA
91SS32	91SS32	pre-Mz																	2237.49	65.8294	NA
91SS32	91SS32	pre-Mz																	2247.85	25.7597	NA
91SS32	91SS32	pre-Mz																	2250.41	53.3478	NA
91SS32	91SS32	pre-Mz																	2252.2	21.6343	NA
91SS32	91SS32	pre-Mz																	2263.21	57.573	NA
91SS32	91SS32	pre-Mz																	2265.93	165.6	NA
91SS32	91SS32	pre-Mz																	2279.93	75.6344	NA
91SS32	91SS32	pre-Mz																	2307.53	44.075	NA
91SS32	91SS32	pre-Mz																	2328.57	55.853	NA
91SS32	91SS32	pre-Mz																	2353.39	53.2126	NA
91SS32	91SS32	pre-Mz																	2353.58	48.5246	NA
91SS32	91SS32	pre-Mz																	2354.75	79.7887	NA
91SS32	91SS32	pre-Mz																	2361.57	145.846	NA
91SS32	91SS32	pre-Mz																	2366.97	44.4214	NA
91SS32	91SS32	pre-Mz																	2368.05	68.9931	NA
91SS32	91SS32	pre-Mz																	2368.83	29.0775	NA
91SS32	91SS32	pre-Mz																	2388.33	109.828	NA
91SS32	91SS32	pre-Mz																	2402.23	36.2208	NA
91SS32	91SS32	pre-Mz																	2403.98	67.0846	NA
91SS32	91SS32	pre-Mz																	2421.58	71.8686	NA
91SS32	91SS32	pre-Mz																	2424.55	48.1166	NA
91SS32	91SS32	pre-Mz																	2469.14	26.0016	NA
91SS32	91SS32	pre-Mz																	2473.09	15.5924	NA
91SS32	91SS32	pre-Mz																	2473.7	40.9576	NA
91SS32	91SS32	pre-Mz																	2478.06	152.088	NA
91SS32	91SS32	pre-Mz																	2480.07	46.7688	NA
91SS32	91SS32	pre-Mz																	2483.63	44.5734	NA
91SS32	91SS32	pre-Mz																	2486.3	46.046	NA
91SS32	91SS32	pre-Mz																	2499.65	52.8274	NA
91SS32	91SS32	pre-Mz																	2517.23	24.5455	NA
91SS32	91SS32	pre-Mz																	2543.28	86.8373	NA
91SS32	91SS32	pre-Mz																	2569.6	85.2642	NA
91SS32	91SS32	pre-Mz																	3071.46	94.836	NA
A-158-7	A-158	PTr-K	1497.81	2884.89	0.978839	19.1597	4.34319	0.207367	5.82599	0.0288155	3.88315	0.666522	183.131	7.01118	191.341	10.1605	293.877	99.1799	183.131	7.01118	NA	exclude	high U
A-158-1	A-158	PTr-K	1030.87	47900.2	0.726348	19.1865	2.81026	0.209361	3.90815	0.0291333	2.71589	0.69493	185.122	4.9562	193.017	6.86986	290.662	64.2136	185.122	4.9562	NA	exclude	high U
A-158-10	A-158	PTr-K	1810	110845	0.94951	19.8561	1.07249	0.206303	1.9911	0.0297097	1.67756	0.842533	188.731	3.12019	190.446	3.45759	211.727	24.8653	188.731	3.12019	NA	exclude	high U
A-158-14	A-158	PTr-K	2271.46	4627.3	1.91718	19.4623	3.54348	0.218289	5.40372	0.0308123	4.0797	0.75498	195.63	7.86125	200.485	9.83146	258.003	81.4704	195.63	7.86125	NA	exclude	high U
A-158-13	A-158	PTr-K	1727.87	1849.65	2.40907	19.4606	1.81396	0.225956	2.39993	0.0318918	1.57136	0.654755	202.377	3.13069	206.855	4.49138	258.183	41.693	202.377	3.13069	NA	exclude	high U
A-158-25	A-158	PTr-K	1345.24	118720	1.75101	19.5459	2.22998	0.233203	2.78646	0.0330589	1.67079	0.599609	209.665	3.4467	212.839	5.3504	248.095	51.3334	209.665	3.4467	NA	exclude	high U
A-158-12	A-158	PTr-K	1226.09	92560	3.56962	19.3954	1.54985	0.235486	2.34923	0.0331255	1.76547	0.751507	210.08	3.64911	214.717	4.54659	265.91	35.5778	210.08	3.64911	NA	exclude	high U
A-158-28	A-158	PTr-K	1927.37	152062	0.851974	19.7169	0.906262	0.233082	2.02659	0.0333308	1.81267	0.894442	211.361	3.76915	212.74	3.88969	228.051	20.948	211.361	3.76915	NA	exclude	high U
A-158-11	A-158	PTr-K	1491.21	104936	2.64248	19.8414	1.25773	0.234973	2.02296	0.0338133	1.58445	0.783233	214.37	3.34073	214.295	3.90822	213.494	29.1372	214.37	3.34073	NA	exclude	high U
A-158-24	A-158	PTr-K	1843.21	2298.27	2.87184	18.2504	12.8428	0.255768	13.0708	0.0338547	2.4309	0.18598	214.628	5.1315	231.251	27.0378	403.772	288.608	214.628	5.1315	NA	exclude	high U
A-158-30	A-158	PTr-K	677.219	32383.8	1.34541	20.502	6.56207	0.193582	6.83139	0.0287845	1.89925	0.278018	182.936	3.42557	179.681	11.2504	137.091	154.294	182.936	3.42557	NA
A-158-6	A-158	PTr-K	739.82	45262	1.17935	20.3441	2.87032	0.196526	3.15281	0.0289972	1.30442	0.413731	184.269	2.36961	182.182	5.25811	155.22	67.2175	184.269	2.36961	NA
A-158-16	A-158	PTr-K	761.507	9583.59	1.00287	19.3527	2.18769	0.206731	6.0349	0.0290166	5.62442	0.931981	184.391	10.224	190.806	10.4981	270.919	50.1813	184.391	10.224	NA
A-158-3	A-158	PTr-K	638.409	43778.7	0.997974	19.8438	2.24973	0.207165	5.16325	0.0298152	4.64735	0.900083	189.392	8.67367	191.171	8.99732	213.17	52.1122	189.392	8.67367	NA
A-158-4	A-158	PTr-K	435.727	19157	1.22455	20.3435	5.61646	0.204724	6.6673	0.030206	3.5928	0.53887	191.837	6.7908	189.115	11.5048	155.287	131.59	191.837	6.7908	NA
A-158-27	A-158	PTr-K	581.922	29575.7	1.01503	19.7894	5.87395	0.210849	7.30004	0.0302624	4.33444	0.593755	192.19	8.20741	194.265	12.908	219.518	136.001	192.19	8.20741	NA
A-158-21	A-158	PTr-K	613.283	50330.4	1.08673	20.3246	5.60027	0.209481	6.22563	0.0308791	2.71947	0.436818	196.048	5.2512	193.117	10.949	157.434	131.137	196.048	5.2512	NA
A-158-26	A-158	PTr-K	420.015	57976	1.31148	20.3291	6.15581	0.211401	8.25471	0.0311692	5.49967	0.666246	197.862	10.7164	194.728	14.6279	156.898	144.196	197.862	10.7164	NA
A-158-8	A-158	PTr-K	856.945	88859	1.46875	19.7774	2.86886	0.217313	7.53686	0.0311711	6.9695	0.924722	197.874	13.5813	199.671	13.6625	220.929	66.365	197.874	13.5813	NA
A-158-2	A-158	PTr-K	261.109	25254.7	2.39086	20.2137	12.123	0.212765	12.6077	0.0311922	3.46246	0.27463	198.006	6.75166	195.871	22.4627	170.204	283.95	198.006	6.75166	NA
A-158-19	A-158	PTr-K	964.818	70327.7	1.42732	19.997	1.8426	0.215667	2.77608	0.0312785	2.0764	0.747961	198.545	4.05975	198.297	5.00074	195.369	42.8302	198.545	4.05975	NA
A-158-17	A-158	PTr-K	272.508	14318.8	1.81354	20.8157	6.3282	0.212862	6.83809	0.0321357	2.59101	0.378909	203.901	5.20043	195.952	12.1863	101.257	149.766	203.901	5.20043	NA
A-158-20	A-158	PTr-K	914.501	179330	2.37822	19.9648	2.02252	0.224049	3.31888	0.032442	2.63143	0.792865	205.814	5.3303	205.275	6.1684	199.069	46.9871	205.814	5.3303	NA
A-158-15	A-158	PTr-K	871.386	23083.4	1.96754	19.4349	2.48631	0.230176	2.87293	0.0324445	1.43945	0.501039	205.829	2.91601	210.344	5.45824	261.23	57.0855	205.829	2.91601	NA
A-158-22	A-158	PTr-K	500.958	52510.4	1.60248	20.7117	4.85904	0.224086	5.02608	0.0336611	1.28502	0.25567	213.421	2.69759	205.305	9.34273	113.128	114.695	213.421	2.69759	NA
A-158-5	A-158	PTr-K	511.812	43788.3	2.45849	19.7893	3.04776	0.236256	4.08689	0.0339087	2.72283	0.666235	214.965	5.75662	215.35	7.93059	219.533	70.5178	214.965	5.75662	NA
A-158-18	A-158	PTr-K	754.444	67268.3	1.60125	19.7257	3.20575	0.237773	4.07104	0.0340169	2.50929	0.616375	215.64	5.32152	216.595	7.94083	226.971	74.0883	215.64	5.32152	NA
A-158-9	A-158	PTr-K	156.598	24828.4	1.31624	20.7887	17.8654	0.225617	18.9125	0.0340172	6.20568	0.328125	215.642	13.1607	206.574	35.3648	104.356	425.159	215.642	13.1607	NA
A-158-29	A-158	PTr-K	890.732	63357.8	3.06992	19.9199	3.04527	0.237537	4.08829	0.0343176	2.72772	0.667203	217.514	5.8342	216.402	7.96808	204.289	70.6579	217.514	5.8342	NA
A-158-23	A-158	PTr-K	480.878	29162.5	3.15885	20.2264	3.32796	0.241703	6.23119	0.0354567	5.26805	0.845433	224.61	11.6288	219.814	12.3165	168.745	77.7495	224.61	11.6288	NA
B-49B-26	B-49B	PTr-K	132.248	11401.7	2.39911	22.4858	14.1959	0.179146	16.3188	0.0292157	8.04854	0.493207	185.638	14.7281	167.326	25.1795	-84.4399	349.23	185.638	14.7281	NA
B-49B-9	B-49B	PTr-K	173.479	4136.3	2.04805	17.9496	11.8268	0.2256	11.9685	0.0293692	1.8359	0.153395	186.599	3.37667	206.56	22.3733	440.871	263.934	186.599	3.37667	NA
B-49B-2	B-49B	PTr-K	344.985	57958.4	2.3589	19.8763	4.75704	0.207785	5.45986	0.0299535	2.67968	0.490796	190.257	5.02378	191.692	9.5378	209.403	110.335	190.257	5.02378	NA
B-49B-33	B-49B	PTr-K	426.216	19225.3	2.47511	20.7225	7.90529	0.199515	11.392	0.0299858	8.20272	0.720041	190.46	15.3944	184.716	19.2421	111.88	186.812	190.46	15.3944	NA
B-49B-32	B-49B	PTr-K	465.777	57875.4	2.20949	20.4425	5.039	0.203163	5.35837	0.0301216	1.82226	0.340078	191.309	3.43494	187.799	9.18745	143.902	118.272	191.309	3.43494	NA
B-49B-23	B-49B	PTr-K	201.857	13184.9	1.79258	20.0892	13.7279	0.206851	13.8683	0.0301383	1.96839	0.141935	191.414	3.71238	190.907	24.1401	184.618	320.975	191.414	3.71238	NA
B-49B-6	B-49B	PTr-K	63.1117	4032.67	1.99436	20.6174	27.9305	0.201976	28.6602	0.0302018	6.42597	0.224212	191.811	12.1442	186.797	48.9383	123.839	669.165	191.811	12.1442	NA
B-49B-31	B-49B	PTr-K	286.893	19986	3.51615	19.407	7.6044	0.214921	8.0234	0.0302508	2.5589	0.31893	192.118	4.84357	197.674	14.4128	264.5	174.734	192.118	4.84357	NA
B-49B-28	B-49B	PTr-K	134.033	2159.74	3.2249	16.1187	11.0678	0.26011	11.2896	0.0304079	2.22728	0.197285	193.101	4.23711	234.755	23.6667	675.487	237.324	193.101	4.23711	NA
B-49B-35	B-49B	PTr-K	270.937	41834.2	1.41509	20.1839	11.8646	0.208101	12.2112	0.0304634	2.88908	0.236592	193.448	5.50585	191.958	21.3612	173.658	277.674	193.448	5.50585	NA
B-49B-5	B-49B	PTr-K	190.257	16002.3	1.46237	18.2652	11.9985	0.230183	12.5262	0.0304927	3.59768	0.287212	193.631	6.86266	210.35	23.8031	401.962	269.592	193.631	6.86266	NA
B-49B-21	B-49B	PTr-K	759.438	17282.2	1.90379	19.6701	6.59208	0.213801	7.03803	0.030501	2.46543	0.350301	193.683	4.7041	196.737	12.5882	233.54	152.298	193.683	4.7041	NA
B-49B-30	B-49B	PTr-K	332.397	24318.3	2.37091	20.3449	6.65995	0.207565	6.78818	0.0306273	1.31315	0.193446	194.473	2.51558	191.507	11.848	155.126	156.087	194.473	2.51558	NA
B-49B-4	B-49B	PTr-K	73.9338	3274.49	2.5091	17.9864	33.2828	0.234804	33.9475	0.03063	6.68508	0.196924	194.49	12.8077	214.156	65.6371	436.314	760.383	194.49	12.8077	NA
B-49B-24	B-49B	PTr-K	90.7575	11831.5	2.02133	23.8209	38.0196	0.177308	38.8033	0.0306327	7.75916	0.199961	194.507	14.8667	165.741	59.4061	-227.718	988.544	194.507	14.8667	NA
B-49B-12	B-49B	PTr-K	133.641	18665	1.92202	21.4385	27.9959	0.197981	28.4063	0.0307835	4.8108	0.169357	195.45	9.26161	183.417	47.7021	31.1063	682.399	195.45	9.26161	NA
B-49B-34	B-49B	PTr-K	504.291	31556.1	2.26101	20.6748	6.18739	0.206029	6.34032	0.0308935	1.38414	0.218307	196.138	2.67394	190.214	10.9984	117.286	146.011	196.138	2.67394	NA
B-49B-25	B-49B	PTr-K	628.118	78755.7	1.5853	19.7496	3.46678	0.216542	4.03827	0.0310169	2.07101	0.512845	196.91	4.01636	199.027	7.29873	224.22	80.189	196.91	4.01636	NA
B-49B-13	B-49B	PTr-K	90.2811	5268.29	2.15317	25.7645	28.4028	0.166549	28.9043	0.0311216	5.36052	0.185458	197.564	10.4298	156.419	41.9253	-429.338	757.747	197.564	10.4298	NA
B-49B-19	B-49B	PTr-K	133.304	7832.37	2.06911	21.9597	29.6047	0.19728	30.246	0.03142	6.19516	0.204826	199.43	12.1658	182.822	50.6459	-26.7572	731.029	199.43	12.1658	NA
B-49B-7	B-49B	PTr-K	126.629	9258.55	1.999	20.7625	18.3603	0.216904	18.5949	0.0326622	2.94441	0.158345	207.189	6.0035	199.33	33.6662	107.347	436.879	207.189	6.0035	NA
B-49B-29	B-49B	PTr-K	421.693	27709.2	2.88989	19.0821	3.76265	0.243357	5.36782	0.0336797	3.82831	0.713196	213.537	8.04096	221.166	10.6682	303.107	85.7745	213.537	8.04096	NA
B-49B-27	B-49B	PTr-K	418.647	42306.5	2.99381	19.3057	5.30081	0.248098	7.01546	0.0347383	4.59544	0.655045	220.136	9.94543	225.03	14.1608	276.531	121.478	220.136	9.94543	NA
B-49B-18	B-49B	PTr-K	336.317	24145.5	1.98502	20.3477	6.29253	0.242972	10.444	0.0358567	8.33557	0.798118	227.1	18.6005	220.851	20.7326	154.805	147.473	227.1	18.6005	NA
Bagby1-59 <>	Bagby1	PTr-K	58	11380	2	17.8189	4.4	0.7023	6.8	0.0908	5.2	0.76	560.1	28	540.2	28.7	457.1	97.9	560.1	28	122.533	exclude	reverse discordance
Bagby1-46 <>	Bagby1	PTr-K	135	2167	1.7	17.9951	10	0.2294	12.9	0.0299	8.1	0.63	190.2	15.1	209.7	24.4	435.2	224.2	190.2	15.1	NA
Bagby1-60 <>	Bagby1	PTr-K	210	6135	1.8	19.0586	6.6	0.2231	7	0.0308	2.4	0.35	195.8	4.7	204.5	13	305.9	149.5	195.8	4.7	NA
Bagby1-7 <>	Bagby1	PTr-K	285	7812	1.6	19.4653	3.7	0.2212	4.4	0.0312	2.3	0.53	198.2	4.5	202.9	8	257.6	85.2	198.2	4.5	NA
Bagby1-37 <>	Bagby1	PTr-K	545	18667	1.1	19.6002	2.8	0.2212	4	0.0314	3	0.73	199.6	5.8	202.9	7.4	241.7	63.4	199.6	5.8	NA
Bagby1-10 <>	Bagby1	PTr-K	45	1764	1.6	21.9127	25.8	0.1999	26.7	0.0318	7	0.26	201.6	13.9	185.1	45.3	-21.6	633.9	201.6	13.9	NA
Bagby1-28 <>	Bagby1	PTr-K	265	17516	2.2	20.0207	5.5	0.2195	6.1	0.0319	2.7	0.44	202.3	5.4	201.5	11.2	192.6	128.2	202.3	5.4	NA
Bagby1-61 <>	Bagby1	PTr-K	555	16407	1.7	19.8264	1.7	0.2228	5	0.032	4.7	0.94	203.3	9.3	204.3	9.2	215.2	38.8	203.3	9.3	NA
Bagby1-7 <>	Bagby1	PTr-K	614	35220	2.8	19.8375	1.6	0.2246	2.5	0.0323	2	0.79	205	4	205.7	4.7	213.9	36.2	205	4	NA
Bagby1-5 <>	Bagby1	PTr-K	309	20443	1.4	19.8877	4	0.2241	4.7	0.0323	2.4	0.51	205.1	4.8	205.3	8.7	208	93.5	205.1	4.8	NA
Bagby1-35 <>	Bagby1	PTr-K	314	18304	1.9	19.6614	5.3	0.228	5.8	0.0325	2.3	0.4	206.2	4.7	208.5	10.9	234.6	122.8	206.2	4.7	NA
Bagby1-3 <>	Bagby1	PTr-K	216	12444	2	19.0564	4.6	0.2374	5	0.0328	1.8	0.37	208.1	3.8	216.3	9.7	306.2	105.2	208.1	3.8	NA
Bagby1-40 <>	Bagby1	PTr-K	189	41390	1.2	21.1502	6.9	0.2159	7.6	0.0331	3.2	0.42	210	6.6	198.5	13.6	63.5	163.5	210	6.6	NA
Bagby1-17 <>	Bagby1	PTr-K	283	13588	1.6	20.4923	5.6	0.2247	6.1	0.0334	2.3	0.38	211.8	4.8	205.8	11.3	138.2	131.7	211.8	4.8	NA
Bagby1-47 <>	Bagby1	PTr-K	330	41674	1.8	19.5694	4.1	0.2369	4.5	0.0336	1.8	0.4	213.2	3.7	215.9	8.8	245.3	95.2	213.2	3.7	NA
Bagby1-34 <>	Bagby1	PTr-K	388	7344	3.5	20.7189	4.6	0.2245	6.8	0.0337	5	0.74	213.9	10.6	205.6	12.7	112.3	109	213.9	10.6	NA
Bagby1-2 <>	Bagby1	PTr-K	181	5942	1.9	20.6106	5.2	0.2285	6	0.0342	3	0.5	216.5	6.3	208.9	11.2	124.6	121.5	216.5	6.3	NA
Bagby1-45 <>	Bagby1	PTr-K	386	19030	1.8	20.3359	3.6	0.2318	4.1	0.0342	2	0.49	216.7	4.3	211.7	7.9	156.1	84.2	216.7	4.3	NA
Bagby1-4 <>	Bagby1	PTr-K	539	25780	1.8	19.9924	1.6	0.2364	2.3	0.0343	1.6	0.7	217.3	3.4	215.5	4.4	195.9	37.8	217.3	3.4	NA
Bagby1-12 <>	Bagby1	PTr-K	154	7442	2.3	20.9895	7.9	0.2255	8.5	0.0343	3.1	0.37	217.6	6.7	206.5	15.9	81.5	187.7	217.6	6.7	NA
Bagby1-18 <>	Bagby1	PTr-K	617	14965	2.8	19.9241	2	0.2378	2.2	0.0344	0.9	0.41	217.8	1.9	216.6	4.3	203.8	46.6	217.8	1.9	NA
Bagby1-43 <>	Bagby1	PTr-K	371	15512	1.8	20.3435	3.9	0.238	4.7	0.0351	2.7	0.56	222.5	5.8	216.8	9.3	155.3	91.9	222.5	5.8	NA
Bagby1-56 <>	Bagby1	PTr-K	265	11032	2.2	20.9291	4	0.2315	4.3	0.0351	1.7	0.38	222.7	3.6	211.5	8.3	88.4	95	222.7	3.6	NA
Bagby1-36 <>	Bagby1	PTr-K	234	18257	0.8	20.0118	4.4	0.2449	4.9	0.0356	2.2	0.45	225.2	4.9	222.5	9.9	193.6	102.8	225.2	4.9	NA
Bagby1-57 <>	Bagby1	PTr-K	249	7993	1.3	19.5626	7.7	0.2601	7.9	0.0369	1.9	0.24	233.6	4.4	234.7	16.6	246.2	177.6	233.6	4.4	NA
Bagby1-14 <>	Bagby1	PTr-K	74	4053	1.7	21.1362	11.8	0.2425	12.1	0.0372	2.5	0.21	235.3	5.9	220.4	24	65	282.8	235.3	5.9	NA
Bagby1-25 <>	Bagby1	PTr-K	81	4675	2.4	20.4595	13.8	0.269	15.5	0.0399	7	0.45	252.3	17.2	241.9	33.3	141.9	325.5	252.3	17.2	NA
Bagby1-55 <>	Bagby1	PTr-K	498	19024	2.1	19.3818	1.4	0.2936	2	0.0413	1.5	0.74	260.8	3.8	261.4	4.6	267.5	31	260.8	3.8	NA
Bagby1-26 <>	Bagby1	PTr-K	176	9202	2	20.491	6.4	0.2818	9.1	0.0419	6.4	0.71	264.5	16.6	252.1	20.3	138.3	151.2	264.5	16.6	NA
Bagby1-1 <>	Bagby1	PTr-K	49	3835	1.9	22.2437	14.1	0.2645	14.2	0.0427	1.6	0.11	269.4	4.2	238.3	30.1	-58	344.7	269.4	4.2	NA
Bagby1-44 <>	Bagby1	PTr-K	358	14685	2.5	19.5128	3.6	0.3087	4.3	0.0437	2.3	0.54	275.7	6.3	273.2	10.4	252	84	275.7	6.3	NA
Bagby1-15 <>	Bagby1	PTr-K	236	31388	1.2	17.5887	5.7	0.4575	6.3	0.0584	2.7	0.43	365.7	9.6	382.5	20.1	485.9	125.9	365.7	9.6	NA
Bagby1-42 <>	Bagby1	PTr-K	513	38347	1.6	18.567	1.2	0.4599	1.8	0.0619	1.3	0.73	387.4	5	384.2	5.8	365.1	27.5	387.4	5	NA
Bagby1-20 <>	Bagby1	PTr-K	108	19083	1.1	14.1288	1.2	1.5543	2	0.1593	1.6	0.8	952.7	14.3	952.2	12.4	951	24.6	951	24.6	100.179
Bagby1-32 <>	Bagby1	PTr-K	248	55412	1.9	14.0054	1.1	1.547	4	0.1571	3.8	0.96	940.9	33.4	949.3	24.5	968.9	21.9	968.9	21.9	97.1101
Bagby1-19 <>	Bagby1	PTr-K	160	30161	3	13.9562	1.4	1.3517	3.8	0.1368	3.5	0.93	826.7	27.4	868.3	22.3	976.1	29.4	976.1	29.4	84.6942
Bagby1-27 <>	Bagby1	PTr-K	105	21019	1.5	13.6881	1.5	1.7014	1.9	0.1689	1.1	0.6	1006.1	10.6	1009.1	12.1	1015.5	30.5	1015.5	30.5	99.0743
Bagby1-13 <>	Bagby1	PTr-K	70	13821	0.7	13.639	3	1.7994	3.6	0.178	2.1	0.58	1056	20.3	1045.2	23.7	1022.8	60.1	1022.8	60.1	103.246
Bagby1-22 <>	Bagby1	PTr-K	56	15569	0.6	13.3191	2.4	1.948	4.7	0.1882	4	0.85	1111.5	40.7	1097.7	31.3	1070.7	48.7	1070.7	48.7	103.811
Bagby1-6 <>	Bagby1	PTr-K	58	12587	1.9	12.9433	3.1	2.065	3.3	0.1938	1.3	0.38	1142.2	13.2	1137.3	22.8	1127.9	61.6	1127.9	61.6	101.268
Bagby1-21 <>	Bagby1	PTr-K	47	3750	1	12.3749	9.2	1.9815	11	0.1778	6	0.54	1055.2	58.2	1109.2	74.4	1216.8	182.1	1216.8	182.1	86.7193
Bagby1-24 <>	Bagby1	PTr-K	172	32145	1.2	10.9886	0.6	2.9879	3.4	0.2381	3.3	0.99	1376.9	41.1	1404.5	25.6	1446.7	10.9	1446.7	10.9	95.1752
Bagby1-48 <>	Bagby1	PTr-K	189	58456	3	10.7969	0.5	3.2872	4	0.2574	3.9	0.99	1476.6	52	1478	30.9	1480.1	8.6	1480.1	8.6	99.7635
Bagby1-58 <>	Bagby1	PTr-K	257	84151	2.4	9.1893	0.3	4.7021	1.7	0.3134	1.7	0.99	1757.3	26.4	1767.6	14.6	1779.8	4.8	1779.8	4.8	98.7358
Bagby1-53 <>	Bagby1	PTr-K	133	23294	1.8	9.1665	0.7	3.9958	5.7	0.2656	5.6	0.99	1518.7	76	1633.3	46	1784.3	12.3	1784.3	12.3	85.1146
Bagby1-30 <>	Bagby1	PTr-K	87	64014	1.8	8.8605	0.5	5.4191	2.4	0.3482	2.4	0.97	1926.2	39.3	1887.9	20.8	1846	9.8	1846	9.8	104.345
Bagby1-50 <>	Bagby1	PTr-K	177	72564	3.6	8.4302	1.2	5.6799	2.6	0.3473	2.3	0.89	1921.6	38.9	1928.3	22.6	1935.5	21.1	1935.5	21.1	99.2818
Bagby1-51 <>	Bagby1	PTr-K	174	139345	3.5	8.4186	1.9	5.6417	5	0.3445	4.7	0.93	1908.1	77	1922.5	43.4	1938	33.6	1938	33.6	98.4572
Bagby1-54 <>	Bagby1	PTr-K	76	72858	1.1	6.7579	0.4	8.6531	2.3	0.4241	2.2	0.98	2279.1	42.8	2302.2	20.6	2322.6	6.9	2322.6	6.9	98.1271
Bagby1-38 <>	Bagby1	PTr-K	160	135113	3.7	5.5458	0.2	12.3365	6.1	0.4962	6.1	1	2597.5	131	2630.4	57.6	2655.8	3.8	2655.8	3.8	97.8048
BC-31-2	BC-31	pre-Mz	126.217		2.08847														798.021	61.9151	NA	exclude	low concordance
BC-31-1	BC-31	pre-Mz	151.99		2.7817														483.072	13.8083	NA
BC-31-3	BC-31	pre-Mz	128.461		4.31423														971.364	27.5793	NA
BC-31-4	BC-31	pre-Mz	162.458		1.1079														978.995	44.1295	NA
BC-31-5	BC-31	pre-Mz	122.753		2.30945														997.566	18.4582	NA
BC-31-6	BC-31	pre-Mz	184.154		3.53786														1043.95	97.9959	NA
BC-31-7	BC-31	pre-Mz	802.022		4.67965														1050.29	27.4183	NA
BC-31-8	BC-31	pre-Mz	160.243		2.23702														1055.06	55.3549	NA
BC-31-9	BC-31	pre-Mz	232.332		1.78229														1062.88	13.6184	NA
BC-31-10	BC-31	pre-Mz	91.4731		1.70201														1079.8	29.6659	NA
BC-31-11	BC-31	pre-Mz	121.698		3.1287														1093.06	15.9319	NA
BC-31-12	BC-31	pre-Mz	115.688		2.7677														1093.09	33.2098	NA
BC-31-13	BC-31	pre-Mz	140.404		1.97298														1110.37	47.1274	NA
BC-31-14	BC-31	pre-Mz	83.2194		2.25413														1134.26	24.3951	NA
BC-31-15	BC-31	pre-Mz	84.2218		1.57462														1141.85	10.1001	NA
BC-31-16	BC-31	pre-Mz	391.515		2.13512														1149.71	23.706	NA
BC-31-17	BC-31	pre-Mz	261.45		6.78333														1164.25	29.79	NA
BC-31-18	BC-31	pre-Mz	76.4087		1.73892														1195.93	18.4716	NA
BC-31-19	BC-31	pre-Mz	267.121		1.94017														1196.98	31.4944	NA
BC-31-20	BC-31	pre-Mz	60.6451		2.40303														1207.81	5.66767	NA
BC-31-21	BC-31	pre-Mz	78.5191		0.967057														1211.96	15.6039	NA
BC-31-22	BC-31	pre-Mz	46.3369		0.98282														1214.44	11.6105	NA
BC-31-23	BC-31	pre-Mz	116.365		2.39631														1215.6	25.1027	NA
BC-31-24	BC-31	pre-Mz	173.009		1.62142														1224.05	8.99801	NA
BC-31-25	BC-31	pre-Mz	70.7324		1.40526														1249.05	10.9145	NA
BC-31-26	BC-31	pre-Mz	68.9319		2.10067														1282.26	16.3663	NA
BC-31-27	BC-31	pre-Mz	208.948		2.43666														1302.35	30.4305	NA
BC-31-28	BC-31	pre-Mz	52.2284		0.847787														1303.29	21.049	NA
BC-31-29	BC-31	pre-Mz	129.776		2.04314														1305.36	20.9096	NA
BC-31-30	BC-31	pre-Mz	142.865		2.20951														1309.35	35.1302	NA
BC-31-31	BC-31	pre-Mz	176.693		3.37779														1324.93	27.6918	NA
BC-31-32	BC-31	pre-Mz	75.006		3.22767														1329.03	19.2177	NA
BC-31-33	BC-31	pre-Mz	47.0732		2.09559														1332.96	16.8671	NA
BC-31-34	BC-31	pre-Mz	147.178		3.05241														1335.44	17.5043	NA
BC-31-35	BC-31	pre-Mz	150.724		2.2982														1338.12	24.5818	NA
BC-31-36	BC-31	pre-Mz	194.258		2.8651														1340.12	25.6774	NA
BC-31-37	BC-31	pre-Mz	84.481		2.2591														1363.98	15.8055	NA
BC-31-38	BC-31	pre-Mz	120.141		2.53295														1369.54	16.4265	NA
BC-31-39	BC-31	pre-Mz	88.7137		0.821409														1378.41	11.8563	NA
BC-31-40	BC-31	pre-Mz	174.926		3.13253														1385.07	31.3388	NA
BC-31-41	BC-31	pre-Mz	113.013		1.41851														1394.98	22.6575	NA
BC-31-42	BC-31	pre-Mz	114.806		1.99218														1395.88	36.7036	NA
BC-31-43	BC-31	pre-Mz	84.2824		2.15481														1396.24	16.6232	NA
BC-31-44	BC-31	pre-Mz	154.063		1.05928														1413.45	42.3201	NA
BC-31-45	BC-31	pre-Mz	246.802		3.25451														1414.17	44.2099	NA
BC-31-46	BC-31	pre-Mz	87.8242		2.12294														1414.76	29.3443	NA
BC-31-47	BC-31	pre-Mz	57.8992		2.10042														1424.33	13.5941	NA
BC-31-48	BC-31	pre-Mz	301.335		1.93036														1425.06	24.8987	NA
BC-31-49	BC-31	pre-Mz	96.0887		3.26306														1434.77	25.4582	NA
BC-31-50	BC-31	pre-Mz	323.011		3.99273														1451.04	23.9673	NA
BC-31-51	BC-31	pre-Mz	117.078		1.65813														1458.2	20.1146	NA
BC-31-52	BC-31	pre-Mz	234.759		1.77865														1459.02	24.4298	NA
BC-31-53	BC-31	pre-Mz	106.847		1.67744														1464.21	38.5999	NA
BC-31-54	BC-31	pre-Mz	93.0012		2.1898														1478.38	16.7202	NA
BC-31-55	BC-31	pre-Mz	111.728		3.15997														1485.35	19.1175	NA
BC-31-56	BC-31	pre-Mz	315.899		2.70085														1535.2	12.9088	NA
BC-31-57	BC-31	pre-Mz	88.2863		2.53718														1568.61	44.68	NA
BC-31-58	BC-31	pre-Mz	66.0035		0.800619														1639.86	31.2107	NA
BC-31-59	BC-31	pre-Mz	132.124		1.08725														1650.02	35.803	NA
BC-31-60	BC-31	pre-Mz	461.88		2.35925														1660.88	35.92	NA
BC-31-61	BC-31	pre-Mz	45.2717		2.30613														1690.19	24.3215	NA
BC-31-62	BC-31	pre-Mz	69.6426		1.11149														1690.73	27.8696	NA
BC-31-63	BC-31	pre-Mz	115.001		2.11033														1728.06	15.4692	NA
BC-31-64	BC-31	pre-Mz	268.176		1.75506														1728.92	46.5853	NA
BC-31-65	BC-31	pre-Mz	568.961		2.52065														1729.2	58.9399	NA
BC-31-66	BC-31	pre-Mz	74.5937		0.641927														1757.28	38.2091	NA
BC-31-67	BC-31	pre-Mz	121.813		1.67551														1762.64	20.527	NA
BC-31-68	BC-31	pre-Mz	167.662		1.3772														1771.15	28.4387	NA
BC-31-69	BC-31	pre-Mz	89.431		1.86408														1778.01	24.2406	NA
BC-31-70	BC-31	pre-Mz	27.5505		1.06963														1780.95	16.3064	NA
BC-31-71	BC-31	pre-Mz	219.379		3.59091														1787.78	36.2206	NA
BC-31-72	BC-31	pre-Mz	116.911		3.19647														1800.99	51.4806	NA
BC-31-73	BC-31	pre-Mz	141.744		4.01857														1802.73	65.8618	NA
BC-31-74	BC-31	pre-Mz	149.131		2.46361														1805.9	35.7622	NA
BC-31-75	BC-31	pre-Mz	176.445		1.61611														1816.7	36.0595	NA
BC-31-76	BC-31	pre-Mz	79.2292		1.9508														1823.46	18.3856	NA
BC-31-77	BC-31	pre-Mz	131.302		1.14836														1832.85	49.6931	NA
BC-31-78	BC-31	pre-Mz	210.231		1.8398														2515.9	17.9908	NA
BC-31-79	BC-31	pre-Mz	47.0588		1.81944														2625.84	56.5248	NA
BCE8-19	BCE-8	pre-Mz	299.605	54976.9	34.9865	13.266	1.00895	1.73168	4.63733	0.166611	4.52624	0.976045	993.413	41.6716	1020.37	29.858	1078.69	20.2422	1078.69	20.2422	92.0942	exclude	high U/Th
BCE8-29	BCE-8	pre-Mz	499.465	139854	14.5058	5.64941	0.302889	10.5906	4.55491	0.433932	4.54483	0.997787	2323.42	88.6658	2487.88	42.2839	2625.04	5.03728	2625.04	5.03728	88.5098	exclude	high U/Th
BCE8-53	BCE-8	pre-Mz	146.038	27004.1	3.98382	8.27953	0.864439	4.13627	1.14902	0.248378	0.756957	0.658787	1430.11	9.7086	1661.5	9.39571	1967.76	15.4136	1967.76	15.4136	72.6769	exclude	low concordance
BCE-39	BCE-8	pre-Mz	58.185	48832.9	1.43019	13.4212	1.04157	1.35593	1.63028	0.131985	1.25417	0.769298	799.182	9.42674	870.118	9.52754	1055.31	20.9961	2653.63	23.2692	75.7294	exclude	low concordance
BCE8-4	BCE-8	pre-Mz	75.9618	32525	0.780213	12.7962	1.54112	1.63839	4.64623	0.152054	4.3832	0.943387	912.465	37.2939	985.093	29.3042	1150.62	30.6022	2668.25	26.4357	79.3019	exclude	low concordance
BCE8-51	BCE-8	pre-Mz	128.069	26616.1	1.56132	5.49335	0.427054	8.487	5.09128	0.338135	5.07334	0.996476	1877.69	82.6468	2284.53	46.2789	2671.52	7.07094	2671.52	7.07094	70.2856	exclude	low concordance
BCE8-60	BCE-8	pre-Mz	23.2846	16619.6	2.62533	11.7952	0.681405	1.85887	1.23809	0.15902	1.0337	0.834921	951.331	9.14274	1066.58	8.17418	1310.49	13.2226	2692.69	52.8478	72.5934	exclude	low concordance
BCE8-73	BCE-8	pre-Mz	75.8835	14738.9	1.0952	11.5611	1.58024	2.16993	2.62466	0.181947	2.09564	0.798442	1077.6	20.7962	1171.46	18.2451	1349.3	30.4999	2742.55	57.3249	79.864	exclude	low concordance
BCE8-7	BCE-8	pre-Mz	140.639	24029.4	1.16104	11.1424	2.88957	2.25812	5.88778	0.182484	5.12994	0.871286	1080.53	51.035	1199.32	41.4574	1420.14	55.238	2760.47	52.6752	76.0859	exclude	low concordance
BCE8-25	BCE-8	pre-Mz	141.193	44825	6.16692	9.26981	0.745487	3.43869	4.69151	0.231186	4.6319	0.987294	1340.71	56.0695	1513.29	36.9209	1763.85	13.625	2922.94	54.6119	76.0106	exclude	low concordance
BCE8-82	BCE-8	pre-Mz	952.035	4438.11	6.02671	14.2481	0.537291	0.653982	1.46375	0.0675803	1.36157	0.930195	421.561	5.5562	510.926	5.87673	933.751	11.0233	421.561	5.5562	NA
BCE8-40	BCE-8	pre-Mz	87.985	7603.93	3.59224	13.3024	1.84141	1.50425	3.00921	0.145127	2.38003	0.790916	873.588	19.4445	932.109	18.3557	1073.19	36.9886	873.588	19.4445	81.4013
BCE8-22	BCE-8	pre-Mz	140.074	27280	2.31871	13.4964	1.83843	1.61533	4.86407	0.158117	4.50326	0.925821	946.304	39.6348	976.181	30.5138	1044.01	37.0997	946.304	39.6348	90.6417
BCE8-55	BCE-8	pre-Mz	129.56	20978.4	7.05249	13.7262	2.90549	1.6414	3.39917	0.163405	1.76423	0.519018	975.671	15.9738	986.253	21.451	1009.86	58.9474	975.671	15.9738	96.6149
BCE8-93	BCE-8	pre-Mz	120.147	28658.2	0.800539	13.655	1.1345	1.69482	5.82261	0.167848	5.71101	0.980834	1000.24	52.9139	1006.58	37.1994	1020.39	22.9684	1020.39	22.9684	98.025
BCE8-98	BCE-8	pre-Mz	129.471	32899.7	3.79273	13.4845	1.93058	1.88478	2.64255	0.184329	1.80443	0.682835	1090.58	18.1042	1075.75	17.5325	1045.83	38.9589	1045.83	38.9589	104.279
BCE8-59	BCE-8	pre-Mz	231.913	24413.5	3.66305	13.4555	2.11892	1.71338	2.91819	0.167206	2.00649	0.68758	996.699	18.5294	1013.55	18.7126	1050.16	42.7101	1050.16	42.7101	94.9091
BCE8-17	BCE-8	pre-Mz	153.632	42204.7	1.87278	13.3933	1.74476	1.85616	5.78233	0.180303	5.51282	0.95339	1068.63	54.289	1065.62	38.1743	1059.49	35.1366	1059.49	35.1366	100.863
BCE8-20	BCE-8	pre-Mz	422.963	93955.9	3.04929	13.3893	0.4818	1.89806	4.18725	0.184318	4.15944	0.993358	1090.52	41.731	1080.41	27.8529	1060.09	9.69655	1060.09	9.69655	102.871
BCE8-1	BCE-8	pre-Mz	247.586	37785.3	2.36639	13.3825	1.2305	1.78983	5.9127	0.173719	5.78324	0.978105	1032.57	55.18	1041.76	38.5352	1061.12	24.779	1061.12	24.779	97.3092
BCE8-95	BCE-8	pre-Mz	76.7217	17120.8	1.64723	13.3721	2.15009	1.84437	2.63446	0.178874	1.52234	0.577855	1060.82	14.8905	1061.42	17.3471	1062.68	43.2582	1062.68	43.2582	99.8249
BCE8-94	BCE-8	pre-Mz	164.556	35655.7	2.58037	13.3437	1.31875	1.84281	1.62604	0.178343	0.951257	0.585015	1057.91	9.2811	1060.87	10.7031	1066.96	26.5316	1066.96	26.5316	99.1519
BCE8-76	BCE-8	pre-Mz	115.275	27194.9	1.78183	13.3397	1.4394	1.88494	2.23376	0.182365	1.70816	0.764702	1079.88	16.9839	1075.8	14.8203	1067.57	28.9512	1067.57	28.9512	101.154
BCE8-87	BCE-8	pre-Mz	82.6192	18264.6	2.13516	13.2957	3.52452	1.98233	3.68656	0.191155	1.08095	0.293213	1127.63	11.1825	1109.51	24.8862	1074.2	70.8193	1074.2	70.8193	104.973
BCE8-67	BCE-8	pre-Mz	62.5766	11899.4	1.69146	13.2466	3.98036	2.00347	4.77139	0.192481	2.63115	0.551443	1134.8	27.378	1116.69	32.3282	1081.59	79.8762	1081.59	79.8762	104.92
BCE8-21	BCE-8	pre-Mz	137.975	18825.4	0.884963	13.1522	2.12443	1.89689	4.46154	0.180942	3.92327	0.879355	1072.12	38.7511	1080	29.6721	1095.95	42.5298	1095.95	42.5298	97.826
BCE8-72	BCE-8	pre-Mz	101.996	27806.9	3.76382	12.9895	2.00185	1.95569	2.34131	0.184243	1.21421	0.518605	1090.12	12.1777	1100.4	15.7313	1120.82	39.913	1120.82	39.913	97.2601
BCE8-78	BCE-8	pre-Mz	221.154	52233.7	4.60514	12.8693	1.1486	1.79735	2.27288	0.167759	1.96131	0.862915	999.752	18.1634	1044.5	14.8294	1139.32	22.8269	1139.32	22.8269	87.7497
[truncated: 6,180 more rows]

## Sheet: PlotDat4
Source sheet	Sheet1	0	0
Plot name	ProbDens3	1	0
Plot Type	16	2	0
1st free col	5	3	0
Sigma Level	1	4	0
Absolute Errs	TRUE	5	0
Symbol Type	1	6	0
Inverse Plot	FALSE	7	0
Color Plot	TRUE	8	0
3D plot	FALSE	9	0
Linear	FALSE	10	0
Data Range	G1:H179	11	0
Filled Symbols	FALSE	12	0
ConcAge	FALSE	13	0
ConcSwap	FALSE	14	0
1st Symbol-row	1	15	0
		16	0
		17	0
		18	0
		19	0
		20	0
		21	0
		22	0
		23	0
		24	0
		25	0
		26	0
		27	0
		28	0
		29	0
		30	0
		31	0
		32	0
		33	0
		34	0
		35	0
		36	0
		37	0
		38	0
		39	0
		40	0
		41	0
		42	0
		43	0
		44	0
		45	0
		46	0
		47	0
		48	0
		49	0
		50	0
		51	0
		52	0
		53	0
		54	0
		55	0
		56	0
		57	0
		58	0
		59	0
		60	0
		61	0
		62	0
		63	0
		64	0
		65	0
		66	0
		67	0
		68	0
		69	0
		70	0
		71	0
		72	0
		73	0
		74	0
		75	0
		76	0
		77	0
		78	0
		79	0
		80	0
		81	0
		82	0
		83	0
		84	0
		85	0
		86	0
		87	0
		88	0
		89	0
		90	0
		91	6.37937e-09
		92	7.64347e-09
		93	9.1423e-09
		94	1.09162e-08
		95	1.30119e-08
		96	1.54833e-08
		97	1.83924e-08
		98	2.18104e-08
		99	2.58192e-08
		100	3.05122e-08
		101	3.59962e-08
		102	4.23927e-08
		103	4.98401e-08
		104	5.8495e-08
		105	6.85347e-08
		106	8.01595e-08
		107	9.35947e-08
		108	1.09094e-07
		109	1.26941e-07
		110	1.47453e-07
		111	1.70986e-07
		112	1.97933e-07
		113	2.28733e-07
		114	2.6387e-07
		115	3.03882e-07
		116	3.49359e-07
		117	4.00951e-07
		118	4.5937e-07
		119	5.25395e-07
		120	5.99877e-07
		121	6.83739e-07
		122	7.77984e-07
		123	8.83697e-07
		124	1.00205e-06
		125	1.13429e-06
		126	1.28179e-06
		127	1.44596e-06
		128	1.62836e-06
		129	1.83062e-06
		130	2.05445e-06
		131	2.30169e-06
		132	2.57424e-06
		133	2.87412e-06
		134	3.20341e-06
		135	3.56428e-06
		136	3.95899e-06
		137	4.38984e-06
		138	4.85921e-06
		139	5.36951e-06
		140	5.92319e-06
		141	6.52272e-06
		142	7.17058e-06
		143	7.86923e-06
		144	8.6211e-06
		145	9.42855e-06
		146	1.02939e-05
		147	1.12193e-05
		148	1.22069e-05
		149	1.32586e-05
		150	1.43761e-05
		151	1.5561e-05
		152	1.68146e-05
		153	1.81448e-05
		154	1.95418e-05
		155	2.10111e-05
		156	2.25535e-05
		157	2.41692e-05
		158	2.58587e-05
		159	2.76222e-05
		160	2.946e-05
		161	3.13723e-05
		162	3.33597e-05
		163	3.54231e-05
		164	3.75639e-05
		165	3.97971e-05
		166	4.21035e-05
		167	4.4498e-05
		168	4.69868e-05
		169	4.95781e-05
		170	5.22824e-05
		171	5.51125e-05
		172	5.80845e-05
		173	6.1225e-05
		174	6.45466e-05
		175	6.80806e-05
		176	7.18582e-05
		177	7.5915e-05
		178	8.02966e-05
		179	8.50385e-05
		180	9.02003e-05
		181	9.58442e-05
		182	0.000102016
		183	0.000108796
		184	0.000116275
		185	0.000124549
		186	0.000133765
		187	0.000144191
		188	0.000156194
		189	0.000170702
		190	0.000189635
		191	0.000217226
		192	0.000262583
		193	0.000344279
		194	0.000498004
		195	0.000787375
		196	0.00131585
		197	0.00223411
		198	0.00373209
		199	0.00600216
		200	0.00916468
		201	0.013166
		202	0.0176943
		203	0.022185
		204	0.0259644
		205	0.0284878
		206	0.0295449
		207	0.0293121
		208	0.0282343
		209	0.0268162
		210	0.0254348
		211	0.0242591
		212	0.0232931
		213	0.0224841
		214	0.0218081
		215	0.0212939
		216	0.0210064
		217	0.0210115
		218	0.0213117
		219	0.021788
		220	0.0222567
		221	0.0226304
		222	0.0229639
		223	0.0234622
		224	0.0247765
		225	0.0251071
		226	0.022187
		227	0.0193106
		228	0.0170437
		229	0.0149862
		230	0.0132649
		231	0.0119411
		232	0.0109266
		233	0.0100608
		234	0.00922521
		235	0.00842197
		236	0.00775999
		237	0.00736103
		238	0.00724557
		239	0.00728398
		240	0.00728197
		241	0.00714913
		242	0.00696952
		243	0.00689169
		244	0.00698186
		245	0.00719553
		246	0.00744296
		247	0.00764607
		248	0.00775084
		249	0.00772131
		250	0.00753953
		251	0.00721155
		252	0.00676814
		253	0.00625596
		254	0.00572471
		255	0.00521654
		256	0.00475962
		257	0.00436526
		258	0.00402971
		259	0.00374037
		260	0.00348347
		261	0.00324936
		262	0.00303382
		263	0.00283639
		264	0.0026578
		265	0.00249768
		266	0.00235343
		267	0.00222012
		268	0.00209122
		269	0.00195994
		270	0.00182085
		271	0.00167112
		272	0.00151116
		273	0.00134445
		274	0.00117655
		275	0.00101379
		276	0.000861936
		277	0.00072522
		278	0.000605865
		279	0.000504211
		280	0.000419159
		281	0.000348744
		282	0.00029068
		283	0.000242807
		284	0.000203221
		285	0.000170397
		286	0.000143142
		287	0.000120509
		288	0.000101744
		289	8.622e-05
		290	7.34229e-05
		291	6.28797e-05
		292	5.41896e-05
		293	4.70336e-05
		294	4.10999e-05
		295	3.61619e-05
		296	3.20104e-05
		297	2.84782e-05
		298	2.54591e-05
		299	2.28412e-05
		300	2.05479e-05
		301	1.85199e-05
		302	1.67069e-05
		303	1.50809e-05
		304	1.36186e-05
		305	1.22933e-05
		306	1.10887e-05
		307	9.98403e-06
		308	8.98779e-06
		309	8.07868e-06
		310	7.24969e-06
		311	6.49455e-06
		312	5.80757e-06
		313	5.18357e-06
		314	4.61318e-06
		315	4.10272e-06
		316	3.64119e-06
		317	3.22487e-06
		318	2.8502e-06
		319	2.51379e-06
		320	2.21245e-06
		321	1.9384e-06
		322	1.69937e-06
		323	1.48664e-06
		324	1.29774e-06
		325	1.13043e-06
		326	9.82574e-07
		327	8.52231e-07
		328	7.37596e-07
		329	6.37014e-07
		330	5.48969e-07
		331	4.72081e-07
		332	4.05093e-07
		333	3.46866e-07
		334	2.96372e-07
		335	2.52687e-07
		336	2.1498e-07
		337	1.82507e-07
		338	1.54608e-07
		339	1.30694e-07
		340	1.10242e-07
		341	9.27911e-08
		342	7.79356e-08
		343	6.53182e-08
		344	5.46263e-08
		345	4.55867e-08
		346	3.79616e-08
		347	3.15442e-08
		348	2.61555e-08
		349	2.1641e-08
		350	1.78673e-08
		351	1.47201e-08
		352	1.21013e-08
		353	9.9271e-09
		354	8.12609e-09
		355	6.63758e-09
		356	0
		357	0
		358	0
		359	0
		360	0
		361	0
		362	0
		363	0
		364	0
		365	0
		366	0
		367	0
		368	0
		369	0
		370	0
		371	0
		372	0
		373	0
		374	0
		375	0
		376	0
		377	0
		378	0
		379	0
		380	0
		381	0
		382	0
		383	0
		384	0
		385	0
		386	0
		387	0
		388	0
		389	0
		390	0
		391	0
		392	0
		393	0
		394	0
		395	0
		396	0
		397	0
		398	0
		399	0
		400	0
		401	0
		402	0
		403	0
		404	0
		405	0
		406	0
		407	0
		408	0
		409	0
		410	0
		411	0
		412	0
		413	5.73878e-09
		414	1.75488e-08
		415	3.28875e-08
		416	6.08683e-08
		417	1.11117e-07
		418	1.99825e-07
		419	3.53567e-07
		420	6.14833e-07
		421	1.04968e-06
		422	1.7578e-06
		423	2.88505e-06
		424	4.63774e-06
		425	7.29752e-06
		426	1.12344e-05
		427	1.69144e-05
		428	2.48974e-05
		429	3.58209e-05
		430	5.03641e-05
		431	6.91916e-05
		432	9.28752e-05
		433	0.000121801
		434	0.000156072
		435	0.000195412
		436	0.000239108
		437	0.000285983
		438	0.000334427
		439	0.000382495
		440	0.000428047
		441	0.000468941
		442	0.00050323
		443	0.000529354
		444	0.000546276
		445	0.000553572
		446	0.000551426
		447	0.000540569
		448	0.000522153
		449	0.000497597
		450	0.000468418
		451	0.000436092
		452	0.00040194
		453	0.00036707
		454	0.000332349
		455	0.000298424
		456	0.000265752
		457	0.000234653
		458	0.00020535
		459	0.000178003
		460	0.000152733
		461	0.00012963
		462	0.000108755
		463	9.0132e-05
		464	7.37485e-05
		465	5.95464e-05
		466	4.74249e-05
		467	3.72442e-05
		468	2.88334e-05
		469	2.2e-05
		470	1.65414e-05
		471	1.22543e-05
		472	8.94394e-06
		473	6.4265e-06
		474	4.55292e-06
		475	3.17711e-06
		476	2.18373e-06
		477	1.4784e-06
		478	9.85856e-07
		479	6.47529e-07
		480	4.1892e-07
		481	2.6695e-07
		482	1.67554e-07
		483	1.03587e-07
		484	6.30785e-08
		485	3.78341e-08
		486	2.23518e-08
		487	1.30067e-08
		488	7.45502e-09
		489	0
		490	0
		491	0
		492	0
		493	0
		494	0
		495	0
		496	0
		497	0
		498	0
		499	0
		500	0
		501	0
		502	0
		503	0
		504	0
		505	0
		506	0
		507	0
		508	0
		509	0
		510	0
		511	0
		512	0
		513	0
		514	0
		515	0
		516	0
		517	0
		518	0
		519	0
		520	0
		521	0
		522	0
		523	0
		524	0
		525	0
		526	0
		527	0
		528	0
		529	0
		530	0
		531	0
		532	0
		533	0
		534	0
		535	0
		536	0
		537	0
		538	0
		539	0
		540	0
		541	0
		542	0
		543	0
		544	0
		545	0
		546	0
		547	0
		548	0
		549	0
		550	0
		551	0
		552	0
		553	0
		554	0
		555	0
		556	0
		557	0
		558	0
		559	0
		560	0
		561	0
		562	0
		563	0
		564	0
		565	0
		566	0
		567	0
		568	0
		569	0
		570	0
		571	0
		572	0
		573	0
		574	0
		575	0
		576	0
		577	0
		578	0
		579	0
		580	0
		581	0
		582	0
		583	0
		584	0
		585	0
		586	0
		587	0
		588	0
		589	0
		590	0
		591	0
		592	0
		593	0
		594	0
		595	0
		596	0
		597	0
		598	0
		599	0
		600	0
		601	0
		602	0
		603	0
		604	0
		605	0
		606	0
		607	0
		608	0
		609	0
		610	0
		611	0
		612	0
		613	0
		614	0
		615	0
		616	0
		617	0
		618	0
		619	0
		620	0
		621	0
		622	0
		623	0
		624	0
		625	0
		626	0
		627	0
		628	0
		629	0
		630	0
		631	0
		632	0
		633	0
		634	0
		635	0
		636	0
		637	0
		638	0
		639	0
		640	0
		641	0
		642	0
		643	0
		644	0
		645	0
		646	0
		647	0
		648	0
		649	0
		650	0
		651	0
		652	0
		653	0
		654	0
		655	0
		656	0
		657	0
		658	0
		659	0
		660	0
		661	0
		662	0
		663	0
		664	0
		665	0
		666	0
		667	0
		668	0
		669	0
		670	0
		671	0
		672	0
		673	0
		674	0
		675	0
		676	0
		677	0
		678	0
		679	0
		680	0
		681	0
		682	0
		683	0
		684	0
		685	0
		686	0
		687	0
		688	0
		689	0
		690	0
		691	0
		692	0
		693	0
		694	0
		695	0
		696	0
		697	0
		698	0
		699	0
		700	0
		701	0
		702	0
		703	0
		704	0
		705	0
		706	0
		707	0
		708	0
		709	0
		710	0
		711	0
		712	6.73543e-09
		713	1.46766e-08
		714	1.89038e-08
		715	2.42899e-08
		716	3.11335e-08
		717	3.98043e-08
		718	5.07578e-08
		719	6.45534e-08
		720	8.18749e-08
		721	1.03555e-07
		722	1.30603e-07
		723	1.64237e-07
		724	2.05921e-07
		725	2.57403e-07
		726	3.20767e-07
		727	3.98476e-07
		728	4.93437e-07
		729	6.09054e-07
		730	7.49297e-07
		731	9.1877e-07
		732	1.12278e-06
		733	1.36743e-06
		734	1.65964e-06
		735	2.0073e-06
		736	2.41925e-06
		737	2.90541e-06
		738	3.47679e-06
		739	4.14557e-06
		740	4.92506e-06
		741	5.82975e-06
		742	6.87528e-06
		743	8.07837e-06
		744	9.45676e-06
		745	1.10291e-05
		746	1.28146e-05
		747	1.48333e-05
		748	1.71053e-05
		749	1.96506e-05
		750	2.24892e-05
		751	2.56401e-05
		752	2.91212e-05
		753	3.29489e-05
		754	3.71375e-05
		755	4.16988e-05
		756	4.66417e-05
		757	5.19713e-05
		758	5.76889e-05
		759	6.37913e-05
		760	7.02705e-05
		761	7.71133e-05
		762	8.4301e-05
		763	9.18095e-05
		764	9.96087e-05
		765	0.000107663
		766	0.000115932
		767	0.000124368
		768	0.00013292
		769	0.000141534
		770	0.000150149
		771	0.000158704
		772	0.000167134
		773	0.000175374
		774	0.000183357
		775	0.000191019
		776	0.000198296
		777	0.000205127
		778	0.000211456
		779	0.00021723
		780	0.000222402
		781	0.000226932
		782	0.000230785
		783	0.000233934
		784	0.000236361
		785	0.000238054
		786	0.000239009
		787	0.000239229
		788	0.000238727
		789	0.00023752
		790	0.000235632
		791	0.000233095
		792	0.000229944
		793	0.000226217
		794	0.00022196
		795	0.000217219
		796	0.00021204
		797	0.000206474
		798	0.000200571
		799	0.000194381
		800	0.000187951
		801	0.000181329
		802	0.00017456
		803	0.000167688
		804	0.000160753
		805	0.000153793
		806	0.000146841
		807	0.000139931
		808	0.00013309
		809	0.000126344
		810	0.000119716
		811	0.000113225
		812	0.000106889
		813	0.000100721
		814	9.47357e-05
		815	8.89418e-05
		816	8.33479e-05
		817	7.79604e-05
		818	7.27842e-05
		819	6.78228e-05
		820	6.30781e-05
		821	5.85512e-05
		822	5.42418e-05
		823	5.01488e-05
		824	4.62703e-05
		825	4.26035e-05
		826	3.91448e-05
		827	3.58901e-05
		828	3.28347e-05
		829	2.99732e-05
		830	2.73001e-05
		831	2.48089e-05
		832	2.24933e-05
		833	2.03464e-05
		834	1.8361e-05
		835	1.65299e-05
		836	1.48456e-05
		837	1.33004e-05
		838	1.18868e-05
		839	1.05971e-05
		840	9.42366e-06
		841	8.35909e-06
		842	7.39598e-06
		843	6.52713e-06
		844	5.74556e-06
		845	5.04452e-06
		846	4.41753e-06
		847	3.85839e-06
		848	3.3612e-06
		849	2.92039e-06
		850	2.5307e-06
		851	2.18722e-06
		852	1.88052e-06
		853	1.61724e-06
		854	1.38705e-06
		855	1.1864e-06
		856	1.01204e-06
		857	8.60961e-07
		858	7.30455e-07
		859	6.18055e-07
		860	5.21535e-07
		861	4.38897e-07
		862	3.68353e-07
		863	3.08312e-07
		864	2.57359e-07
		865	2.14245e-07
		866	1.77871e-07
		867	1.47273e-07
		868	1.21608e-07
		869	1.00144e-07
		870	8.22456e-08
		871	6.73631e-08
		872	5.50244e-08
		873	4.4824e-08
		874	3.64158e-08
		875	2.95047e-08
		876	2.38405e-08
		877	1.92116e-08
		878	1.54396e-08
		879	1.23745e-08
		880	9.89113e-09
		881	7.88472e-09
		882	6.26829e-09
		883	0
		884	0
		885	0
		886	0
		887	0
		888	0
		889	0
		890	0
		891	0
		892	0
		893	0
		894	0
		895	0
		896	0
		897	0
		898	0
		899	0
		900	0
		901	0
		902	0
		903	0
		904	0
		905	0
		906	0
		907	0
		908	0
		909	0
		910	0
		911	0
		912	0
		913	0
		914	0
		915	0
		916	0
		917	0
		918	0
		919	0
		920	0
		921	0
		922	0
		923	0
		924	0
		925	0
		926	0
		927	0
		928	0
		929	0
		930	0
		931	0
		932	0
		933	0
		934	0
		935	0
		936	0
		937	0
		938	0
		939	0
		940	0
		941	0
		942	0
		943	0
		944	0
		945	0
		946	0
		947	0
		948	0
		949	0
		950	0
		951	0
		952	0
		953	0
		954	0
		955	0
		956	0
		957	0
		958	0
		959	0
		960	0
		961	0
		962	0
		963	0
		964	0
		965	0
		966	0
		967	0
		968	0
		969	0
		970	0
		971	0
		972	0
		973	0
		974	0
		975	0
		976	0
		977	0
		978	0
		979	0
		980	0
		981	0
		982	0
		983	0
		984	0
		985	0
		986	0
		987	0
		988	0
		989	0
		990	0
		991	0
		992	0
		993	0
		994	0
		995	0
		996	0
		997	0
		998	0
		999	0
		1000	0
		1001	0
		1002	0
		1003	0
		1004	0
		1005	0
		1006	0
		1007	0
		1008	0
		1009	0
		1010	0
		1011	0
		1012	0
		1013	0
		1014	0
		1015	0
		1016	0
		1017	0
		1018	0
		1019	0
		1020	0
		1021	0
		1022	0
		1023	0
		1024	0
		1025	0
		1026	0
		1027	0
		1028	0
		1029	0
		1030	0
		1031	0
		1032	0
		1033	0
		1034	0
		1035	0
		1036	0
		1037	0
		1038	0
		1039	0
		1040	0
		1041	0
		1042	0
		1043	0
		1044	0
		1045	0
		1046	0
		1047	0
		1048	0
		1049	0
		1050	0
		1051	0
		1052	0
		1053	0
		1054	0
		1055	0
		1056	0
		1057	0
		1058	0
		1059	0
		1060	0
		1061	0
		1062	0
		1063	0
		1064	0
		1065	0
		1066	0
		1067	0
		1068	0
		1069	0
		1070	0
		1071	0
		1072	0
		1073	0
		1074	0
		1075	0
		1076	0
		1077	0
		1078	0
		1079	0
		1080	0
		1081	0
		1082	0
		1083	0
		1084	0
		1085	0
		1086	0
		1087	0
		1088	0
		1089	0
		1090	0
		1091	0
		1092	0
		1093	0
		1094	0
		1095	0
		1096	0
		1097	0
		1098	0
		1099	0
		1100	0
		1101	0
		1102	0
		1103	0
		1104	0
		1105	0
		1106	0
		1107	0
		1108	0
		1109	0
		1110	0
		1111	0
		1112	0
		1113	0
		1114	0
		1115	0
		1116	0
		1117	0
		1118	0
		1119	0
		1120	0
		1121	0
		1122	0
		1123	0
		1124	0
		1125	0
		1126	0
		1127	0
		1128	0
		1129	0
		1130	0
		1131	0
		1132	0
		1133	0
		1134	0
		1135	0
		1136	0
		1137	0
		1138	0
		1139	0
		1140	0
		1141	0
		1142	0
		1143	0
		1144	0
		1145	0
		1146	0
		1147	0
		1148	0
		1149	0
		1150	0
		1151	0
		1152	0
		1153	0
		1154	0
		1155	0
		1156	0
		1157	0
		1158	0
		1159	0
		1160	0
		1161	0
		1162	0
		1163	0
		1164	0
		1165	0
		1166	0
		1167	0
		1168	0
		1169	0
		1170	0
		1171	0
		1172	0
		1173	0
		1174	0
		1175	0
		1176	0
		1177	0
		1178	0
		1179	0
		1180	0
		1181	0
		1182	0
		1183	0
		1184	0
		1185	0
		1186	0
		1187	0
		1188	0
		1189	0
		1190	0
		1191	0
		1192	0
		1193	0
		1194	0
		1195	0
		1196	0
		1197	0
		1198	0
		1199	0
		1200	0
		1201	0
		1202	0
		1203	0
		1204	0
		1205	0
		1206	0
		1207	0
		1208	0
		1209	0
		1210	0
		1211	0
		1212	0
		1213	0
		1214	0
		1215	0
		1216	0
		1217	0
		1218	0
		1219	0
		1220	0
		1221	0
		1222	0
		1223	0
		1224	0
		1225	0
		1226	0
		1227	0
		1228	0
		1229	0
		1230	0
		1231	0
		1232	0
		1233	0
		1234	0
		1235	0
		1236	0
		1237	0
		1238	0
		1239	0
		1240	0
		1241	0
		1242	0
		1243	0
		1244	0
		1245	0
		1246	0
		1247	0
		1248	0
		1249	0
		1250	0
		1251	0
		1252	0
		1253	0
		1254	0
		1255	0
		1256	0
		1257	0
		1258	0
		1259	0
		1260	0
		1261	0
		1262	0
		1263	0
		1264	0
		1265	0
		1266	0
		1267	0
		1268	0
		1269	0
		1270	0
		1271	0
		1272	0
		1273	0
		1274	0
		1275	0
		1276	0
		1277	0
		1278	0
		1279	0
		1280	0
		1281	0
		1282	0
		1283	0
		1284	0
		1285	0
		1286	0
		1287	0
		1288	0
		1289	0
		1290	0
		1291	0
		1292	0
		1293	0
		1294	0
		1295	0
		1296	0
		1297	0
		1298	0
		1299	0
		1300	0
		1301	0
		1302	0
		1303	0
		1304	0
		1305	0
		1306	0
		1307	0
		1308	0
		1309	0
		1310	0
		1311	0
		1312	0
		1313	0
		1314	0
		1315	0
		1316	0
		1317	0
		1318	0
		1319	0
		1320	0
		1321	0
		1322	0
		1323	0
		1324	0
		1325	0
		1326	0
		1327	0
		1328	0
		1329	0
		1330	0
		1331	0
		1332	0
		1333	0
		1334	0
		1335	0
		1336	0
		1337	0
		1338	0
		1339	0
		1340	0
		1341	0
		1342	0
		1343	0
		1344	0
		1345	0
		1346	0
		1347	0
		1348	0
		1349	0
		1350	0
		1351	0
		1352	0
		1353	0
		1354	0
		1355	0
		1356	0
		1357	0
		1358	0
		1359	0
		1360	0
		1361	0
		1362	0
		1363	0
		1364	0
		1365	0
		1366	0
		1367	0
		1368	0
		1369	0
		1370	0
		1371	0
		1372	0
		1373	0
		1374	0
		1375	0
		1376	0
		1377	0
		1378	0
		1379	0
		1380	0
		1381	0
		1382	0
		1383	0
		1384	0
		1385	0
		1386	0
		1387	0
		1388	0
		1389	0
		1390	0
		1391	0
		1392	0
		1393	0
		1394	0
		1395	0
		1396	0
		1397	0
		1398	0
		1399	0
		1400	0
		1401	0
		1402	0
		1403	0
		1404	0
		1405	0
		1406	0
		1407	0
		1408	0
		1409	0
		1410	0
		1411	0
		1412	0
		1413	0
		1414	0
		1415	0
		1416	0
		1417	0
		1418	0
		1419	0
		1420	0
		1421	0
		1422	0
		1423	0
		1424	0
		1425	0
		1426	0
		1427	0
		1428	0
		1429	0
		1430	0
		1431	0
		1432	0
		1433	0
		1434	0
		1435	0
		1436	0
		1437	0
		1438	0
		1439	0
		1440	0
		1441	0
		1442	0
		1443	0
		1444	0
		1445	0
		1446	0
		1447	0
		1448	0
		1449	0
		1450	0
		1451	0
		1452	0
		1453	0
		1454	0
		1455	0
		1456	0
		1457	0
		1458	0
		1459	0
		1460	0
		1461	0
		1462	0
		1463	0
		1464	0
		1465	0
		1466	0
		1467	0
		1468	0
		1469	0
		1470	0
		1471	0
		1472	0
		1473	0
		1474	0
		1475	0
		1476	0
		1477	0
		1478	0
		1479	0
		1480	0
		1481	0
		1482	0
		1483	0
		1484	0
		1485	0
		1486	0
		1487	5.93779e-09
		1488	8.26482e-09
		1489	1.14415e-08
		1490	1.57533e-08
		1491	2.15725e-08
		1492	2.93813e-08
		1493	3.97998e-08
		1494	5.36205e-08
		1495	7.18492e-08
		1496	9.5753e-08
		1497	1.26918e-07
		1498	1.67315e-07
		1499	2.19375e-07
		1500	2.86074e-07
		1501	3.71032e-07
		1502	4.78612e-07
		1503	6.14039e-07
		1504	7.83518e-07
		1505	9.94357e-07
		1506	1.25509e-06
		1507	1.57561e-06
		1508	1.96727e-06
		1509	2.44297e-06
		1510	3.01726e-06
		1511	3.70636e-06
		1512	4.52817e-06
		1513	5.50222e-06
		1514	6.64957e-06
		1515	7.99263e-06
		1516	9.55489e-06
		1517	1.13606e-05
		1518	1.34344e-05
		1519	1.58007e-05
		1520	1.8483e-05
		1521	2.15097e-05
		1522	2.48914e-05
		1523	2.86493e-05
		1524	3.27969e-05
		1525	3.73429e-05
		1526	4.22906e-05
		1527	4.76373e-05
		1528	5.33731e-05
		1529	5.94812e-05
		1530	6.59367e-05
		1531	7.27073e-05
		1532	7.97529e-05
		1533	8.70263e-05
		1534	9.4474e-05
		1535	0.000102037
		1536	0.000109652
		1537	0.000117254
		1538	0.000124777
		1539	0.000132157
		1540	0.000139333
		1541	0.00014625
		1542	0.000152862
		1543	0.000159132
		1544	0.000165036
		1545	0.00017056
		1546	0.000175705
		1547	0.000180487
		1548	0.000184933
		1549	0.000189081
		1550	0.00019298
		1551	0.000196686
		1552	0.000200257
		1553	0.000203751
		1554	0.000207223
		1555	0.000210718
		1556	0.000214269
		1557	0.000217893
		1558	0.000221589
		1559	0.000225331
		1560	0.000229076
		1561	0.000232754
		1562	0.000236277
		1563	0.000239537
		1564	0.000242413
		1565	0.000244772
		1566	0.00024648
		1567	0.0002474
		1568	0.000247409
		1569	0.000246395
		1570	0.000244267
		1571	0.00024096
		1572	0.000236437
		1573	0.000230693
		1574	0.000223758
		1575	0.000215689
		1576	0.00020658
		1577	0.000196546
		1578	0.00018573
		1579	0.000174289
		1580	0.000162393
		1581	0.000150218
		1582	0.000137939
		1583	0.000125726
		1584	0.000113736
		1585	0.000102112
		1586	9.09768e-05
		1587	8.04342e-05
		1588	7.05645e-05
		1589	6.14254e-05
		1590	5.30532e-05
		1591	4.54635e-05
		1592	3.86536e-05
		1593	3.26049e-05
		1594	2.72856e-05
		1595	2.26533e-05
		1596	1.86583e-05
		1597	1.52458e-05
		1598	1.23582e-05
		1599	9.93777e-06
		1600	7.92763e-06
		1601	6.27358e-06
		1602	4.92496e-06
		1603	3.83531e-06
		1604	2.96285e-06
		1605	2.27051e-06
		1606	1.72601e-06
		1607	1.30157e-06
		1608	9.7363e-07
		1609	7.22471e-07
		1610	5.26397e-07
		1611	3.8445e-07
		1612	2.78516e-07
		1613	2.00145e-07
		1614	1.42667e-07
		1615	1.00876e-07
		1616	7.0751e-08
		1617	4.92225e-08
		1618	3.39687e-08
		1619	2.32529e-08
		1620	1.57892e-08
		1621	1.06348e-08
		1622	7.10524e-09
		1623	0
		1624	0
		1625	0
		1626	0
		1627	0
		1628	0
		1629	0
		1630	0
		1631	0
		1632	0
		1633	0
		1634	0
		1635	0
		1636	0
		1637	0
		1638	0
		1639	0
		1640	0
		1641	0
		1642	0
		1643	0
		1644	0
		1645	0
		1646	0
		1647	0
		1648	0
		1649	0
		1650	0
		1651	0
		1652	0
		1653	0
		1654	0
		1655	0
		1656	0
		1657	0
		1658	0
		1659	0
		1660	0
		1661	0
		1662	0
		1663	0
		1664	0
		1665	0
		1666	0
		1667	6.78749e-09
		1668	1.11887e-08
		1669	1.82205e-08
		1670	2.93119e-08
		1671	4.65836e-08
		1672	7.31356e-08
		1673	1.1343e-07
		1674	1.73795e-07
		1675	2.63057e-07
		1676	3.9334e-07
		1677	5.81021e-07
		1678	8.47856e-07
		1679	1.22224e-06
		1680	1.7406e-06
		1681	2.44876e-06
		1682	3.4033e-06
		1683	4.6726e-06
		1684	6.33758e-06
		1685	8.49168e-06
		1686	1.12401e-05
		1687	1.46978e-05
		1688	1.89862e-05
		1689	2.42288e-05
		1690	3.05444e-05
		1691	3.80396e-05
		1692	4.68001e-05
		1693	5.68805e-05
		1694	6.82945e-05
		1695	8.10053e-05
		1696	9.49177e-05
		1697	0.000109872
		1698	0.000125641
		1699	0.000141933
		1700	0.000158403
		1701	0.000174636
		1702	0.000190201
		1703	0.000204646
		1704	0.000217524
		1705	0.000228415
		1706	0.000236953
		1707	0.000242842
		1708	0.000245878
		1709	0.000245958
		1710	0.000243089
		1711	0.000237388
		1712	0.000229075
		1713	0.000218463
		1714	0.000205939
		1715	0.000191946
		1716	0.000176958
		1717	0.000161461
		1718	0.000145928
		1719	0.000130806
		1720	0.000116494
		1721	0.000103339
		1722	9.16265e-05
		1723	8.15775e-05
		1724	7.33518e-05
		1725	6.70506e-05
		1726	6.27223e-05
		1727	6.03695e-05
		1728	5.99553e-05
		1729	6.14097e-05
		1730	6.46345e-05
		1731	6.95076e-05
		1732	7.58859e-05
		1733	8.36063e-05
		1734	9.24874e-05
		1735	0.000102336
		1736	0.000112927
		1737	0.000124033
		1738	0.000135407
		1739	0.000146795
		1740	0.000157935
		1741	0.000168565
		1742	0.00017843
		1743	0.000187288
		1744	0.000194921
		1745	0.000201138
		1746	0.000205786
		1747	0.000208757
		1748	0.000209991
		1749	0.000209478
		1750	0.000207264
		1751	0.000203443
		1752	0.000198175
		1753	0.000191646
		1754	0.000184093
		1755	0.000175781
		1756	0.000167002
		1757	0.00015806
		1758	0.000149263
		1759	0.000140913
		1760	0.000133298
		1761	0.000126681
		1762	0.000121293
		1763	0.000117326
		1764	0.000114925
		1765	0.000114186
		1766	0.000115152
		1767	0.000117808
		1768	0.000122084
		1769	0.000127855
		1770	0.000134944
		1771	0.000143125
		1772	0.000152131
		1773	0.000161663
		1774	0.000171397
		1775	0.000180995
		1776	0.000190118
		1777	0.000198438
		1778	0.00020565
		1779	0.00021148
		1780	0.0002157
		1781	0.000218136
		1782	0.00021867
		1783	0.000217247
		1784	0.000213876
		1785	0.000208625
		1786	0.00020162
		1787	0.000193038
		1788	0.000183093
		1789	0.000172033
		1790	0.00016012
		1791	0.000147629
		1792	0.000134829
		1793	0.000121976
		1794	0.000109307
		1795	9.70268e-05
		1796	8.53123e-05
		1797	7.42972e-05
		1798	6.4098e-05
		1799	5.47755e-05
		1800	4.63657e-05
		1801	3.88756e-05
		1802	3.22869e-05
		1803	2.6561e-05
		1804	2.16437e-05
		1805	1.74698e-05
		1806	1.39674e-05
		1807	1.10614e-05
		1808	8.67708e-06
		1809	6.74228e-06
		1810	5.18931e-06
		1811	3.95623e-06
		1812	2.9876e-06
		1813	2.23477e-06
		1814	1.65581e-06
		1815	1.21523e-06
		1816	8.83439e-07
		1817	6.36155e-07
		1818	4.53752e-07
		1819	3.20586e-07
		1820	2.24356e-07
		1821	1.55525e-07
		1822	1.06791e-07
		1823	7.26332e-08
		1824	4.89335e-08
		1825	3.26547e-08
		1826	2.15851e-08
		1827	1.4133e-08
		1828	9.16601e-09
		1829	5.88839e-09
		1830	0
		1831	0
		1832	0
		1833	0
		1834	0
		1835	0
		1836	0
		1837	0
		1838	0
		1839	0
		1840	0
		1841	0
		1842	0
		1843	0
		1844	0
		1845	0
		1846	0
		1847	0
		1848	0
		1849	0
		1850	0
		1851	0
		1852	0
		1853	0
		1854	0
		1855	0
		1856	0
		1857	0
		1858	0
		1859	0
		1860	0
		1861	0
		1862	0
		1863	0
		1864	0
		1865	0
		1866	0
		1867	0
		1868	0
		1869	0
		1870	0
		1871	0
		1872	0
		1873	0
		1874	0
		1875	0
		1876	0
		1877	0
		1878	0
		1879	0
		1880	0
		1881	0
		1882	0
		1883	0
		1884	0
		1885	0
		1886	0
		1887	0
		1888	0
		1889	0
		1890	0
		1891	0
		1892	0
		1893	0
		1894	0
		1895	0
		1896	0
		1897	0
		1898	0
		1899	0
		1900	0
		1901	0
		1902	0
		1903	0
		1904	0
		1905	0
		1906	0
		1907	0
		1908	0
		1909	0
		1910	0
		1911	0
		1912	0
		1913	0
		1914	0
		1915	0
		1916	0
		1917	0
		1918	0
		1919	0
		1920	0
		1921	0
		1922	0
		1923	0
		1924	0
		1925	0
		1926	0
		1927	0
		1928	0
		1929	0
		1930	0
		1931	0
		1932	0
		1933	0
		1934	0
		1935	0
		1936	0
		1937	0
		1938	0
		1939	0
		1940	0
		1941	0
		1942	0
		1943	0
		1944	0
		1945	0
		1946	0
		1947	0
		1948	0
		1949	0
		1950	0
		1951	0
		1952	0
		1953	0
		1954	0
		1955	0
		1956	0
		1957	0
		1958	0
		1959	0
		1960	0
		1961	0
		1962	0
		1963	0
		1964	0
		1965	0
		1966	0
		1967	0
		1968	0
		1969	0
		1970	0
		1971	0
		1972	0
		1973	0
		1974	0
		1975	0
		1976	0
		1977	0
		1978	0
		1979	0
		1980	0
		1981	0
		1982	0
		1983	0
		1984	0
		1985	0
		1986	0
		1987	0
		1988	0
		1989	0
		1990	0
		1991	0
		1992	0
		1993	0
		1994	0
		1995	0
		1996	0
		1997	0
		1998	0
		1999	0
[truncated: 1 more rows]
